# Supplementary material for: Quantitative Analysis of Vortical Blood Flow in the Thoracic Aorta Using 4D Phase Contrast MRI
Source: PLoS One. 2015 Sep 29;10(9):e0139025. doi: 10.1371/journal.pone.0139025 (PMC4587936; doi:10.1371/journal.pone.0139025)
Supplement: S3 Data — (XLSX) [file pone.0139025.s003.xlsx]

## Sheet: 0
P1					P2					P3					P4					P5					P6					P7					P8					P9							min	max	avg
min	max	avg	ccw [%]	cw [%]	min	max	avg	ccw [%]	cw [%]	min	max	avg	ccw [%]	cw [%]	min	max	avg	ccw [%]	cw [%]	min	max	avg	ccw [%]	cw [%]	min	max	avg	ccw [%]	cw [%]	min	max	avg	ccw [%]	cw [%]	min	max	avg	ccw [%]	cw [%]	min	max	avg	ccw [%]	cw [%]	0	0	-45.71	41.6994	-0.393556
-26.9571	35.8283	0.8209	0.0892495	0.0425963	-49.6034	36.2521	-1.3964	0.143376	0.186025	-57.299	38.2199	0.230994	0.143495	0.103954	-52.5795	44.8959	-0.97256	0.116138	0.156349	-39.4622	50.0019	-1.33913	0.0701754	0.132757	-62.1222	59.7788	-1.10261	0.155932	0.187223	-32.6529	38.1432	0.01142	0.0520937	0.0481057	-36.7647	37.6869	0.733422	0.141816	0.102264	-53.949	34.4874	-0.528042	0.0939908	0.106061	1	0.4	-43.0048	39.1923	-0.370885
-25.9278	36.1996	0.762054	0.0878972	0.0368492	-46.1171	32.7046	-1.58186	0.123714	0.18905	-52.2424	33.9746	-0.0193303	0.127551	0.104911	-50.3078	43.079	-0.635842	0.115873	0.144444	-37.1378	47.1984	-1.56672	0.065724	0.137471	-58.2831	55.48	-0.438504	0.157497	0.171056	-31.723	36.1016	0.131266	0.0463609	0.0438684	-32.5023	34.7846	0.609017	0.126203	0.0923757	-52.8021	33.2084	-0.598039	0.085773	0.101695	2	0.8	-40.5311	38.723	-0.355277
-24.8985	36.5709	0.714909	0.0848546	0.0338066	-42.6309	35.3188	-1.78161	0.110405	0.190563	-47.5941	34.6549	-0.293251	0.108737	0.105548	-49.3023	43.9027	-0.291159	0.113492	0.134656	-34.8134	44.3948	-1.80344	0.0597015	0.141922	-54.4439	54.0422	0.184476	0.163755	0.153325	-30.793	34.2149	0.232431	0.0461117	0.0383848	-28.6482	33.1368	0.484104	0.105126	0.0895134	-51.6552	32.2706	-0.643964	0.0793529	0.104006	3	1.2	-38.5293	38.8857	-0.331096
-23.8692	36.9423	0.647531	0.0828262	0.035835	-39.1446	38.1423	-1.9504	0.104053	0.195402	-42.9459	35.3351	-0.540468	0.0870536	0.10236	-48.2967	44.7264	0.0510766	0.119312	0.125132	-33.317	41.5913	-2.03949	0.0555119	0.15292	-50.6048	52.6044	0.848733	0.168709	0.133246	-29.863	33.1544	0.334546	0.0510967	0.0353938	-28.2146	35.7307	0.357572	0.0921155	0.0887328	-50.5083	31.7445	-0.68896	0.075244	0.101181	4	1.6	-37.5319	39.8088	-0.318002
-22.8399	37.3136	0.572955	0.0770791	0.0388776	-42.9766	41.3258	-2.12324	0.107078	0.202662	-38.2977	36.0153	-0.798536	0.0707908	0.103635	-47.6903	45.5501	0.379979	0.125397	0.116138	-32.272	38.7878	-2.27295	0.0539408	0.161299	-47.2605	51.1666	1.4851	0.172621	0.118644	-28.933	33.7031	0.441247	0.0655533	0.0346461	-28.1557	42.056	0.21285	0.0887328	0.0965392	-49.3614	32.3607	-0.759417	0.0739599	0.105547	5	2	-37.9901	41.0138	-0.295242
-21.8106	37.6849	0.519029	0.0730223	0.0422583	-48.0311	44.6064	-2.29479	0.11101	0.202359	-33.8556	36.6956	-1.06676	0.0634566	0.114796	-48.0814	46.3738	0.708263	0.132275	0.109259	-31.8299	35.9842	-2.49851	0.0526316	0.16994	-51.361	49.7288	2.13737	0.17914	0.108214	-28.003	36.1637	0.561396	0.0777667	0.0331505	-30.7236	48.6465	0.093281	0.0934166	0.107989	-48.2144	33.2406	-0.816458	0.0729327	0.110426	6	2.4	-39.2139	43.148	-0.278705
-20.7813	38.0562	0.457763	0.0709939	0.0466531	-53.3682	47.8871	-2.45586	0.11706	0.200242	-32.5971	37.3758	-1.31751	0.0637755	0.132015	-48.4726	48.2981	1.03861	0.142063	0.10291	-31.5752	33.1807	-2.74298	0.051846	0.180937	-55.4615	51.3933	2.75501	0.191656	0.0998696	-27.073	38.6242	0.673563	0.084995	0.0371386	-35.7772	55.4355	-0.0481359	0.0967994	0.131148	-47.8189	38.0812	-0.868791	0.079096	0.119671	7	2.8	-42.505	46.229	-0.260234
-23.0709	38.4275	0.39559	0.0726842	0.0513861	-59.9066	51.1677	-2.63954	0.122202	0.206292	-34.5173	38.0561	-1.58191	0.0660077	0.14764	-48.8637	51.1674	1.38414	0.149206	0.0931217	-35.1355	34.0504	-2.97474	0.0528934	0.190626	-59.562	56.523	3.40431	0.200782	0.0868318	-26.1431	41.0847	0.789084	0.0882353	0.0436191	-40.8308	62.573	-0.180705	0.103825	0.143378	-54.515	43.0109	-0.938329	0.0852594	0.126862	8	3.2	-46.2583	49.7847	-0.248238
-25.9657	38.7988	0.341677	0.0791075	0.0594997	-67.2147	54.4484	-2.83605	0.124622	0.211736	-36.4374	38.7746	-1.84886	0.0717474	0.160077	-49.2548	54.0367	1.71579	0.156349	0.0888889	-39.1325	37.8325	-3.21987	0.0560356	0.197958	-63.6625	61.7504	4.03729	0.22399	0.0816167	-26.9954	44.7694	0.889844	0.0907278	0.0500997	-46.4509	69.7105	-0.30732	0.112152	0.156128	-61.2111	47.9406	-1.00664	0.0945044	0.133025	9	3.6	-50.8092	53.806	-0.229297
-28.8606	39.1701	0.288667	0.0875592	0.0665991	-74.6457	57.729	-3.01818	0.129159	0.217786	-43.6105	40.472	-2.11102	0.0765306	0.168048	-49.6459	57.0232	2.05255	0.165608	0.0880952	-43.4478	41.6147	-3.44685	0.0599633	0.208955	-67.763	68.285	4.66154	0.243807	0.0797914	-29.1588	50.2415	0.999159	0.0934696	0.0570788	-52.2428	76.848	-0.431945	0.123081	0.169919	-67.9072	52.8703	-1.05759	0.101438	0.138932	10	4	-55.6235	57.9607	-0.215692
-31.7555	39.5414	0.230743	0.0939824	0.0736984	-82.0767	61.0097	-3.2258	0.138838	0.227163	-51.2134	42.1693	-2.36913	0.0825893	0.178571	-50.4746	60.2135	2.36549	0.177778	0.0902116	-47.7631	45.3968	-3.68374	0.0631055	0.217596	-71.8636	75.8162	5.29593	0.258931	0.0813559	-32.8269	55.7136	1.10765	0.0937188	0.0625623	-58.0348	83.9855	-0.561289	0.130627	0.180588	-74.6033	57.8	-1.10108	0.11171	0.143811	11	4.4	-59.6974	57.319	-0.488577
-32.8469	38.3041	-0.0287539	0.0851927	0.076403	-91.7981	58.2725	-3.87944	0.131276	0.22807	-58.4231	39.3852	-3.28162	0.0688776	0.200893	-46.6408	55.651	2.07182	0.170899	0.094709	-49.2147	41.9847	-3.86629	0.065724	0.226761	-80.6211	77.8783	4.52837	0.248761	0.0904824	-33.7236	53.1293	0.812002	0.114158	0.0844965	-66.7838	87.8562	-0.256992	0.133229	0.171741	-77.2246	63.4092	-0.496295	0.125835	0.137904	12	4.8	-67.5087	59.379	-0.76812
-33.9384	37.0668	-0.290099	0.0780933	0.0807978	-101.52	55.9175	-4.53049	0.122505	0.227465	-65.6328	36.601	-4.21076	0.0586735	0.217156	-43.0564	57.2272	1.75614	0.168519	0.106085	-51.2062	39.5465	-4.05458	0.065724	0.225975	-89.3786	80.5375	3.76179	0.242503	0.134289	-67.4675	66.7693	0.52371	0.139831	0.132602	-75.5328	91.7269	0.0406145	0.134791	0.165496	-79.846	69.0185	0.0905942	0.13585	0.132512	13	5.2	-76.2859	64.9453	-1.04524
-35.0299	35.8295	-0.533556	0.071332	0.0892495	-111.331	54.77	-5.21625	0.117665	0.224138	-72.8425	36.474	-5.12988	0.0478316	0.239158	-47.4116	60.6346	1.44772	0.162698	0.119048	-53.8612	42.2119	-4.25573	0.0652003	0.22231	-98.1361	84.2257	2.99914	0.230769	0.170274	-101.211	100.136	0.24425	0.155284	0.165254	-84.2818	95.5977	0.331031	0.138954	0.161072	-82.4673	74.6277	0.706074	0.143297	0.127632	14	5.6	-85.3301	72.044	-1.3252
-36.1213	34.5922	-0.792929	0.0659229	0.0980392	-121.863	53.7052	-5.87225	0.115547	0.226558	-80.0522	38.7092	-6.06654	0.0440051	0.253827	-52.5844	64.042	1.13927	0.164286	0.132275	-56.6533	44.8774	-4.41453	0.065724	0.220477	-107.622	89.1814	2.20534	0.226076	0.193742	-134.955	133.504	-0.0405774	0.164257	0.181954	-93.0308	99.4684	0.613249	0.141296	0.164195	-85.0886	90.3165	1.30218	0.153826	0.121212	15	6	-94.5059	80.5303	-1.60578
-37.2128	33.3549	-1.05348	0.056119	0.106153	-132.394	54.8464	-6.5606	0.11343	0.226558	-87.2619	41.2676	-6.9567	0.0411352	0.267219	-58.2462	67.4495	0.830104	0.160847	0.145767	-60.0255	47.5428	-4.60646	0.0712228	0.221524	-117.224	97.3285	1.43844	0.22425	0.211213	-168.699	166.871	-0.32394	0.171486	0.198654	-101.78	103.339	0.912077	0.144158	0.169659	-87.7099	112.773	1.86854	0.157422	0.11813	16	6.4	-103.777	90.1882	-1.8858
-38.3042	32.1176	-1.31978	0.0483435	0.115957	-142.925	57.8909	-7.21468	0.11101	0.22807	-94.8253	44.932	-7.90087	0.0398597	0.273916	-63.9081	70.8569	0.522166	0.165608	0.160317	-63.5469	52.9491	-4.80263	0.079602	0.231212	-126.825	110.269	0.67639	0.221121	0.231551	-202.443	200.238	-0.626232	0.17672	0.210867	-110.887	107.21	1.21919	0.147281	0.167317	-90.3312	135.23	2.47422	0.165896	0.116076	17	6.8	-113.667	100.347	-2.16651
-39.3957	30.9484	-1.58368	0.045977	0.123056	-153.457	61.9314	-7.89959	0.111615	0.232002	-104.838	48.5963	-8.82309	0.0382653	0.285395	-69.5699	74.2643	0.213833	0.172222	0.171958	-67.6957	60.3963	-4.99212	0.0892904	0.235664	-136.426	123.21	-0.0802805	0.219817	0.24824	-236.187	233.605	-0.911664	0.177218	0.214606	-120.322	112.381	1.51735	0.154827	0.164715	-95.111	157.789	3.06066	0.174628	0.114792	18	7.2	-124.249	111.366	-2.44203
-40.4872	33.0727	-1.82308	0.045977	0.133536	-164.759	65.972	-8.58205	0.11101	0.236842	-116.617	52.2607	-9.719	0.0366709	0.295281	-75.2317	77.8013	-0.0959008	0.174339	0.185979	-72.1105	67.8435	-5.15801	0.100288	0.23933	-146.027	136.15	-0.864234	0.221121	0.272751	-269.931	266.972	-1.19233	0.182453	0.2166	-129.757	121.8	1.80086	0.165235	0.168878	-103.32	180.425	3.65546	0.183616	0.118644	19	7.6	-135.187	122.59	-2.72206
-41.5786	35.1969	-2.08236	0.0466531	0.14165	-176.357	71.3149	-9.26798	0.112825	0.242589	-128.714	55.925	-10.6556	0.0341199	0.302934	-80.8935	81.8727	-0.398256	0.177513	0.203968	-76.8405	75.2906	-5.3412	0.111024	0.244305	-157.899	149.091	-1.61587	0.227119	0.294654	-303.675	300.339	-1.47865	0.188435	0.221087	-139.192	131.218	2.09108	0.174603	0.176164	-111.53	203.061	4.25032	0.19697	0.125578	20	8	-146.495	133.858	-3.00501
-42.6701	37.3211	-2.35226	0.0480054	0.151792	-187.954	77.0139	-9.93767	0.11706	0.249849	-140.874	59.5894	-11.563	0.0334821	0.308673	-86.5553	85.944	-0.7145	0.181481	0.223016	-81.9904	82.7378	-5.54146	0.119141	0.25216	-172.624	162.076	-2.39479	0.229987	0.3103	-337.419	333.706	-1.74965	0.194417	0.227567	-148.627	140.637	2.38141	0.185532	0.185272	-119.739	225.697	4.82683	0.207756	0.136877	21	8.4	-140.858	130.072	-2.85547
-39.3323	35.3	-2.34483	0.0469912	0.150101	-186.569	76.1975	-9.89734	0.117665	0.246824	-138.451	66.1587	-11.4172	0.0341199	0.302296	-82.5298	85.0689	-0.396484	0.18545	0.221429	-81.5445	79.6472	-5.17023	0.122021	0.243781	-174.322	164.561	-2.25484	0.228162	0.300652	-303.963	312.356	-1.79785	0.192672	0.235294	-142.499	134.727	2.6633	0.190736	0.171481	-118.508	216.631	4.91626	0.208783	0.135336	22	8.8	-135.636	126.519	-2.71518
-35.9945	33.2789	-2.34377	0.0439486	0.152806	-187.451	75.381	-9.82956	0.12069	0.246219	-136.472	72.728	-11.2839	0.0497449	0.303571	-79.067	85.0761	-0.114507	0.187831	0.221693	-81.5648	76.5567	-4.79444	0.124378	0.236711	-176.02	167.047	-2.11135	0.230769	0.294394	-270.507	291.005	-1.84199	0.197159	0.240778	-136.371	130.037	2.89978	0.202446	0.164975	-117.278	207.565	4.98306	0.213405	0.139445	23	9.2	-130.572	124.852	-2.57433
-32.8081	31.2578	-2.33261	0.0432725	0.150778	-188.651	74.6861	-9.7508	0.121597	0.244707	-134.621	79.2973	-11.1652	0.0577168	0.302615	-75.6043	94.3215	0.210916	0.186772	0.215608	-81.7885	73.4662	-4.44248	0.130401	0.228332	-178.331	169.533	-2.0085	0.23103	0.293611	-237.051	270.066	-1.88745	0.200648	0.244018	-130.243	132.545	3.14536	0.212594	0.168358	-116.047	198.499	5.06175	0.215973	0.140729	24	9.6	-125.901	123.952	-2.41934
-30.002	29.2367	-2.34103	0.0402299	0.15213	-189.851	76.1075	-9.67852	0.125227	0.245009	-132.769	85.98	-11.0293	0.0634566	0.298469	-72.5988	104.477	0.533053	0.191005	0.21455	-82.4089	70.3757	-4.07781	0.135899	0.218905	-182.264	172.019	-1.83782	0.228162	0.293351	-203.595	252.321	-1.88196	0.202642	0.245264	-124.115	135.623	3.37695	0.223263	0.173042	-115.502	189.433	5.16237	0.223421	0.143297	25	10	-121.934	123.707	-2.27678
-27.3816	27.2156	-2.33294	0.0388776	0.154496	-191.051	80.471	-9.61465	0.127949	0.246824	-130.917	93.4857	-10.8877	0.0682398	0.298151	-73.2116	114.633	0.815015	0.193651	0.215344	-83.6685	68.5178	-3.70203	0.142969	0.213668	-186.197	175.394	-1.71507	0.228944	0.293611	-170.139	234.576	-1.90947	0.21012	0.248006	-117.987	138.7	3.6141	0.233672	0.177466	-116.851	180.367	5.24168	0.233693	0.146636	26	10.4	-121.833	123.886	-2.13373
-27.7879	25.1945	-2.33629	0.0371873	0.155849	-194.327	84.8345	-9.536	0.133091	0.243799	-129.324	100.991	-10.788	0.073023	0.293048	-73.8244	124.789	1.13063	0.201323	0.214021	-85.1366	69.8057	-3.34146	0.153443	0.206337	-190.13	179.446	-1.56175	0.231551	0.296741	-162.098	216.831	-1.95725	0.211864	0.253739	-115.674	141.778	3.86454	0.247723	0.18267	-118.199	171.301	5.32195	0.24114	0.149204	27	10.8	-129.261	130.527	-1.98234
-28.1943	23.2962	-2.32868	0.0395538	0.160243	-201.178	89.198	-9.47776	0.133696	0.243497	-132.106	108.497	-10.6554	0.0771684	0.28699	-75.3291	134.945	1.45126	0.205026	0.218254	-87.1922	71.0937	-2.98374	0.164703	0.202933	-194.063	183.497	-1.40697	0.242503	0.301695	-199.107	257.126	-1.98511	0.212612	0.25673	-118.941	144.855	4.14843	0.263336	0.186053	-127.238	162.235	5.39694	0.248588	0.152029	28	11.2	-140.491	139.55	-1.83822
-29.9129	21.6829	-2.32401	0.0412441	0.160243	-208.545	93.5615	-9.42829	0.136721	0.245614	-147.785	121.284	-10.5115	0.0838648	0.277742	-80.876	145.1	1.75983	0.212434	0.221958	-89.8316	72.3817	-2.6114	0.175439	0.201362	-207.981	187.549	-1.3089	0.246675	0.307953	-236.116	300.322	-2.0001	0.214855	0.258724	-125.215	147.933	4.39752	0.276347	0.193078	-138.159	166.137	5.48289	0.253724	0.160247	29	11.6	-153.257	149.539	-1.69417
-33.391	20.3493	-2.31061	0.045977	0.157539	-216.185	97.925	-9.34939	0.140048	0.246219	-163.465	138.203	-10.39	0.0899235	0.273278	-86.4229	155.256	2.04988	0.222487	0.228307	-92.4711	73.6697	-2.24217	0.184603	0.199267	-230.44	192.364	-1.19424	0.257627	0.316037	-273.125	343.517	-2.03696	0.222582	0.261715	-133.629	151.01	4.65323	0.288056	0.197762	-150.186	173.56	5.5727	0.257833	0.168207	30	12	-166.395	160.07	-1.54579
-36.8691	19.5639	-2.31646	0.0500338	0.157201	-223.825	102.288	-9.28961	0.141863	0.251059	-179.144	155.122	-10.2493	0.0978954	0.273597	-92.8516	165.412	2.36187	0.233333	0.235979	-95.1106	77.969	-1.88472	0.194292	0.198481	-254.352	198.394	-1.0712	0.269622	0.326728	-310.134	386.713	-2.03602	0.228814	0.264706	-142.043	154.088	4.92191	0.301067	0.205048	-163.227	181.085	5.65142	0.262969	0.171289	31	12.4	-159.117	154.816	-1.38395
-40.6184	22.4725	-2.46815	0.0412441	0.153144	-220.916	101.635	-9.26271	0.140048	0.262553	-179.128	160.14	-9.70387	0.103954	0.273597	-88.1885	166.037	2.35152	0.233333	0.238889	-91.2701	79.0288	-1.26445	0.202409	0.195077	-250.246	193.964	-0.856768	0.262321	0.335593	-268.31	344.729	-1.61234	0.226321	0.26346	-137.409	147.909	4.60159	0.293	0.199844	-155.964	177.425	5.75963	0.260657	0.171803	32	12.8	-153.378	149.822	-1.21481
-44.3677	26.6172	-2.6231	0.0419202	0.142664	-218.007	100.981	-9.23475	0.147005	0.268603	-179.111	165.157	-9.17682	0.112883	0.276148	-89.87	166.662	2.39322	0.23545	0.240212	-89.4618	80.0886	-0.646637	0.212097	0.192197	-246.138	190.578	-0.654372	0.256584	0.353325	-226.485	302.745	-1.13634	0.225823	0.262213	-138.263	141.73	4.2846	0.287536	0.193078	-148.701	173.839	5.86092	0.262455	0.173087	33	13.2	-148.059	144.943	-1.0557
-48.117	30.9294	-2.79395	0.0449628	0.127113	-215.098	100.327	-9.20901	0.158197	0.271022	-179.095	170.175	-8.64701	0.121811	0.274554	-91.5532	167.288	2.38366	0.239947	0.237566	-87.8531	81.1484	-0.0412184	0.217858	0.188531	-242.031	188.037	-0.521556	0.252673	0.363494	-188.232	260.76	-0.62775	0.225823	0.258724	-139.117	135.551	3.96299	0.285454	0.185532	-141.437	170.268	5.99256	0.262969	0.171803	34	13.6	-145.961	140.192	-0.8916
-51.8663	35.2417	-2.94215	0.051048	0.132522	-212.189	99.6738	-9.19711	0.178766	0.278584	-179.078	175.193	-8.12415	0.130421	0.270089	-93.2364	167.913	2.39163	0.240476	0.235979	-86.2444	82.2082	0.576176	0.222833	0.18408	-237.924	186.653	-0.332112	0.252673	0.370013	-178.963	218.776	-0.144095	0.22682	0.254487	-139.971	129.372	3.64924	0.286495	0.176685	-134.174	166.696	6.09818	0.261428	0.170776	35	14	-144.925	135.527	-0.731151
-56.5452	39.5539	-3.1012	0.0574713	0.143002	-209.298	99.0202	-9.18669	0.198125	0.288566	-180.2	180.211	-7.59469	0.140625	0.266263	-98.214	168.658	2.40115	0.239153	0.232275	-84.6358	83.7505	1.18195	0.228332	0.182509	-233.817	185.444	-0.187301	0.251108	0.37914	-173.875	176.791	0.348787	0.228315	0.249252	-140.825	123.193	3.33608	0.288837	0.167838	-126.911	163.124	6.22156	0.256805	0.167694	36	14.4	-145.263	134.696	-0.564517
-62.7457	44.0954	-3.2455	0.0659229	0.153482	-206.812	98.3665	-9.13256	0.219903	0.296431	-184.112	185.493	-7.06277	0.149235	0.259885	-108.283	170.234	2.37467	0.242063	0.231746	-83.0271	85.3986	1.8047	0.235664	0.179366	-230.678	184.995	0.016236	0.25502	0.383572	-170.061	167.112	0.810006	0.229561	0.244267	-141.679	117.014	3.02567	0.290658	0.162113	-119.972	159.553	6.32889	0.24602	0.165639	37	14.8	-147.173	135.55	-0.394345
-69.2575	48.662	-3.40392	0.076741	0.162272	-204.325	97.7128	-9.12205	0.239262	0.303993	-190.128	191.049	-6.5208	0.156569	0.255102	-118.353	171.81	2.41169	0.245503	0.230688	-81.4184	87.0467	2.43076	0.240377	0.176486	-230.571	184.712	0.224016	0.256845	0.388787	-173.798	172.144	1.27706	0.232552	0.236042	-143.396	110.835	2.72107	0.295602	0.160552	-113.311	155.981	6.43307	0.241911	0.165126	38	15.2	-151.087	137.236	-0.224964
-75.8021	53.2286	-3.54658	0.0895876	0.172414	-201.839	97.0592	-9.10098	0.253781	0.308227	-203.085	196.606	-5.99089	0.168048	0.248724	-128.422	173.75	2.43711	0.253439	0.233069	-80.0865	88.6948	3.03137	0.246138	0.168107	-230.463	184.985	0.417233	0.261017	0.388005	-183.886	183.739	1.76339	0.235793	0.231555	-149.547	104.656	2.40307	0.301327	0.163154	-106.651	152.41	6.56159	0.240627	0.162815	39	15.6	-156.343	140.265	-0.0531664
-82.3468	57.7952	-3.6924	0.0987153	0.176809	-199.353	96.4055	-9.06788	0.262855	0.31337	-223.417	202.162	-5.442	0.174426	0.242028	-138.492	176.408	2.44109	0.257143	0.240741	-78.8435	90.3429	3.64497	0.250327	0.16287	-230.356	191.512	0.620226	0.26884	0.385658	-197.575	199.857	2.26581	0.231805	0.232802	-156.718	98.4774	2.08415	0.303929	0.165235	-99.9903	149.424	6.66753	0.237031	0.163328	40	16	-162.639	144.219	0.115769
-88.8915	62.3618	-3.83278	0.111224	0.180527	-196.866	98.8084	-9.03715	0.272535	0.314277	-246.187	207.718	-4.91724	0.181441	0.231186	-148.561	179.066	2.45716	0.263492	0.24709	-77.6005	91.991	4.24223	0.255302	0.158157	-234.183	201.089	0.814233	0.274055	0.384094	-211.531	217.354	2.75553	0.234297	0.24327	-165.581	92.831	1.77144	0.300807	0.17018	-94.3528	146.756	6.7885	0.234206	0.171032	41	16.4	-155.072	139.843	0.19049
-91.1793	62.608	-3.71977	0.117985	0.180527	-192.915	96.22	-9.03863	0.272837	0.311252	-234.091	201.761	-4.61248	0.180804	0.226403	-141.63	175.14	2.58703	0.259524	0.248677	-73.1033	88.118	4.30368	0.256874	0.157371	-215.472	197.335	1.02565	0.267536	0.384876	-201.013	203.805	2.99221	0.230558	0.239282	-161.876	89.2554	1.61416	0.290658	0.161593	-84.3704	144.34	6.56255	0.228814	0.178223	42	16.8	-148.397	135.905	0.275821
-93.467	63.0182	-3.58832	0.123056	0.178499	-188.964	94.7007	-9.0486	0.275257	0.310042	-221.995	195.803	-4.29279	0.180485	0.220344	-135.903	171.215	2.75729	0.256878	0.253439	-74.0995	84.2449	4.35638	0.258968	0.158942	-198.096	194.403	1.21165	0.263103	0.387484	-190.494	191.439	3.23286	0.226072	0.234048	-158.17	86.4012	1.48287	0.289878	0.156648	-74.388	141.924	6.37106	0.227016	0.176939	43	17.2	-142.193	132.528	0.351234
-95.8713	63.6299	-3.45721	0.12407	0.175794	-185.013	94.6091	-9.07546	0.279492	0.310042	-211.047	189.846	-3.98523	0.181122	0.214286	-130.59	167.29	2.93241	0.253439	0.258201	-75.4856	80.3718	4.41492	0.260801	0.159204	-182.883	194.727	1.34259	0.25528	0.393481	-179.976	179.171	3.49523	0.221336	0.229312	-154.465	83.5469	1.34092	0.288056	0.15795	-64.4055	139.56	6.15295	0.223934	0.174628	44	17.6	-136.884	129.472	0.427893
-98.5118	64.2416	-3.33491	0.12407	0.172076	-181.211	94.5175	-9.10872	0.282517	0.308832	-200.725	183.888	-3.65907	0.181441	0.207908	-125.276	163.364	3.08745	0.254233	0.259259	-76.8716	77.9152	4.47613	0.262896	0.160775	-171.01	195.879	1.48172	0.25189	0.398957	-169.457	166.903	3.77495	0.214855	0.224327	-150.759	81.3157	1.19539	0.285714	0.166276	-58.1354	137.225	5.93809	0.218798	0.169235	45	18	-135.056	126.869	0.513657
-101.152	64.8533	-3.20633	0.129479	0.165991	-177.583	94.4258	-9.07986	0.284332	0.309135	-190.404	177.931	-3.35209	0.183036	0.208227	-127.692	160.291	3.22293	0.253175	0.261111	-78.2577	77.4182	4.52477	0.266824	0.160513	-161.668	197.429	1.66569	0.253716	0.395567	-158.939	154.635	4.04129	0.210369	0.217846	-147.053	79.943	1.04366	0.282332	0.175904	-72.7531	134.89	5.76285	0.219055	0.165383	46	18.4	-133.923	124.563	0.588511
-103.793	65.465	-3.08828	0.134212	0.16261	-173.956	94.3342	-9.08152	0.281912	0.307018	-180.082	171.973	-3.03323	0.18463	0.205357	-133.169	157.935	3.36145	0.255291	0.266402	-79.6437	76.9213	4.57713	0.268657	0.163132	-155.425	199.401	1.82486	0.257366	0.390352	-148.42	143.91	4.29129	0.214108	0.216351	-143.45	78.5703	0.910153	0.279209	0.185792	-87.3708	132.554	5.53474	0.215973	0.163842	47	18.8	-133.712	123.731	0.669741
-106.433	66.0768	-2.9598	0.136917	0.158553	-170.328	94.2425	-9.09524	0.284936	0.30732	-170.471	166.016	-2.71723	0.188457	0.200255	-138.647	155.579	3.52008	0.262698	0.268254	-81.0298	76.4243	4.64161	0.270228	0.16575	-156.532	202.457	1.97868	0.259974	0.389309	-137.902	145.363	4.5748	0.218345	0.216351	-140.076	77.1976	0.75992	0.277127	0.192298	-101.989	130.219	5.32484	0.21546	0.158706	48	19.2	-133.584	123.751	0.745434
-109.074	66.6885	-2.85304	0.137931	0.154834	-166.7	94.1509	-9.10644	0.284029	0.308832	-161.607	160.058	-2.39974	0.19611	0.195472	-144.124	154.769	3.70336	0.269841	0.268519	-82.4159	78.6339	4.70127	0.272846	0.166012	-157.639	205.513	2.10933	0.266493	0.383051	-127.384	149.144	4.84144	0.225573	0.212114	-136.703	76.5524	0.584316	0.275306	0.197762	-116.606	128.247	5.12842	0.217001	0.154083	49	19.6	-133.563	124	0.838321
-111.714	67.3002	-2.71731	0.14165	0.15382	-163.073	94.0592	-9.13887	0.285541	0.311857	-153.716	154.1	-2.04921	0.203444	0.19324	-149.601	154.363	3.84172	0.274868	0.271164	-83.8019	81.3769	4.75071	0.275727	0.166798	-158.746	208.569	2.32905	0.281617	0.375228	-116.865	152.926	5.12663	0.230558	0.210867	-133.33	76.328	0.452176	0.276347	0.204007	-131.224	126.977	4.94999	0.217514	0.148177	50	20	-134.58	124.901	0.906631
-114.636	67.9119	-2.60969	0.142326	0.15213	-159.49	94.1415	-9.13441	0.288566	0.31337	-150.089	148.143	-1.73847	0.209821	0.191645	-155.078	158.506	4.02051	0.280952	0.268254	-85.188	84.1199	4.80219	0.279654	0.166274	-164.352	212.38	2.50897	0.297523	0.372881	-106.584	156.707	5.30401	0.235045	0.211615	-129.957	76.4468	0.290722	0.276086	0.204267	-145.842	125.752	4.71584	0.220339	0.14869	51	20.4	-129.725	119.677	0.984337
-114.441	63.4567	-2.32572	0.14334	0.149087	-160.28	91.1342	-8.69307	0.290986	0.30974	-139.795	144.958	-1.48497	0.20727	0.191964	-149.37	152.005	4.02079	0.27619	0.264815	-82.7446	82.2885	4.76251	0.281225	0.165226	-159.741	207.712	2.43951	0.294133	0.373664	-100.066	140.927	5.19683	0.235543	0.208126	-123.881	73.4838	0.39348	0.273484	0.198803	-137.204	121.13	4.54968	0.220339	0.146636	52	20.8	-125.084	114.991	1.06497
-114.249	59.0013	-2.0298	0.150101	0.146383	-161.071	88.1268	-8.26004	0.293103	0.306413	-130.071	142.769	-1.21338	0.202168	0.192602	-143.662	148.729	4.03969	0.271958	0.263757	-80.301	80.4569	4.72124	0.283582	0.164441	-156.482	203.044	2.33017	0.292568	0.372621	-93.5487	125.415	5.07786	0.232802	0.205135	-117.805	70.8714	0.508204	0.272964	0.193859	-128.567	116.508	4.41082	0.221109	0.144838	53	21.2	-120.881	110.796	1.13766
-114.196	54.5459	-1.74462	0.156187	0.142664	-161.861	85.341	-7.83941	0.295826	0.30369	-122.486	140.66	-0.978572	0.200255	0.191008	-137.954	146.114	4.06753	0.269577	0.261905	-77.8574	78.6253	4.67876	0.285677	0.164179	-154.89	198.957	2.25382	0.290743	0.376793	-87.0311	111.517	4.95158	0.232303	0.203141	-111.728	69.5156	0.59617	0.270362	0.186313	-119.929	111.886	4.25372	0.219569	0.142527	54	21.6	-117.19	107.604	1.23549
-114.143	50.115	-1.43262	0.164976	0.140636	-162.651	83.3635	-7.37532	0.297943	0.299153	-118.794	138.55	-0.70069	0.199298	0.190051	-132.246	143.5	4.09388	0.262434	0.259259	-75.4138	76.7937	4.64301	0.283582	0.164703	-153.959	195.425	2.18762	0.294394	0.376532	-80.5134	104.392	4.86653	0.233051	0.199651	-105.652	69.0298	0.718093	0.270882	0.180328	-111.337	107.263	4.11887	0.220596	0.140473	55	22	-113.672	105.734	1.31495
-114.09	51.2004	-1.14062	0.168019	0.136241	-163.544	81.8459	-6.94389	0.298851	0.296733	-116.196	136.676	-0.433852	0.197704	0.190689	-126.538	141.071	4.12175	0.260582	0.255026	-72.9703	74.9622	4.60408	0.28044	0.167059	-153.027	191.893	2.09495	0.297001	0.369231	-73.9957	101.556	4.73115	0.232054	0.1999	-99.6914	69.4749	0.824234	0.2688	0.178246	-102.991	102.929	3.97676	0.215716	0.139188	56	22.4	-111.256	104.831	1.39908
-114.036	52.2857	-0.855762	0.167005	0.134212	-164.78	81.5661	-6.50278	0.300968	0.293406	-114.299	135.792	-0.132384	0.196429	0.192602	-128.785	139.249	4.14636	0.258995	0.255026	-70.5857	73.1306	4.55884	0.276774	0.166798	-152.096	188.361	1.98978	0.298044	0.362712	-67.4781	101.57	4.61252	0.230309	0.199651	-94.5958	71.2778	0.9365	0.26776	0.180068	-94.645	100.246	3.83867	0.212635	0.136877	57	22.8	-109.293	104.444	1.47654
-113.983	53.3711	-0.576896	0.168019	0.131846	-166.016	81.3625	-6.06022	0.302178	0.288566	-112.401	134.908	0.136408	0.196747	0.19037	-133.176	137.426	4.12539	0.25582	0.248942	-68.5242	71.299	4.53765	0.271275	0.161299	-151.165	184.829	1.90338	0.30352	0.349935	-62.5713	104.23	4.4833	0.227069	0.198405	-89.5003	73.8793	1.04688	0.264377	0.177205	-86.299	98.6903	3.69293	0.204674	0.131741	58	23.2	-108.821	104.338	1.55814
-113.93	54.4565	-0.286338	0.167681	0.128127	-167.251	81.1588	-5.61579	0.304598	0.286146	-110.504	134.154	0.427182	0.198023	0.191008	-137.706	135.604	4.14824	0.256878	0.245767	-66.4627	70.1731	4.50559	0.265515	0.154229	-150.234	181.375	1.83533	0.310821	0.340808	-66.9753	107.408	4.32788	0.217846	0.196411	-84.4048	76.6247	1.14082	0.262555	0.175644	-81.9256	98.0847	3.54039	0.202619	0.126862	59	23.6	-109.998	104.791	1.64321
-113.877	55.8588	0.00205946	0.169371	0.125423	-170.988	82.5344	-5.16811	0.309437	0.282517	-108.606	134.435	0.669484	0.195153	0.190051	-144.139	133.782	4.161	0.255291	0.240476	-64.4012	69.3808	4.48248	0.262111	0.145588	-149.303	179.249	1.77249	0.32073	0.337158	-72.3141	111.031	4.2104	0.211366	0.195663	-79.3092	79.3702	1.24754	0.252407	0.175124	-87.0447	97.479	3.41156	0.199281	0.124294	60	24	-111.687	106.191	1.72727
-113.824	57.2813	0.271584	0.169033	0.122042	-175.146	85.2708	-4.73013	0.31337	0.279794	-107.908	135.14	0.93976	0.197066	0.187819	-150.573	138.296	4.20229	0.250794	0.239947	-62.3397	68.5886	4.43785	0.260016	0.142184	-148.372	177.122	1.74687	0.329074	0.332986	-77.8973	114.654	4.06154	0.207378	0.193669	-76.9578	82.4962	1.34848	0.240958	0.173562	-92.1638	96.8733	3.26723	0.196456	0.124294	61	24.4	-106.002	102.609	1.86097
-113.477	56.5971	0.633448	0.177147	0.112576	-171.514	81.2108	-4.14909	0.316092	0.281609	-100.368	135.783	1.31017	0.194196	0.183992	-139.569	134.021	4.03177	0.250529	0.238095	-59.605	66.5829	4.38128	0.257659	0.137732	-139.814	170.145	1.44557	0.321773	0.332464	-75.4005	105.44	4.0701	0.20987	0.183948	-71.4341	80.251	1.71584	0.238355	0.165756	-82.8401	93.4488	3.30967	0.194658	0.116846	62	24.8	-101.04	100.015	1.99635
-113.129	55.9129	0.993096	0.187289	0.108857	-167.881	77.3864	-3.60511	0.318512	0.279492	-92.8283	136.426	1.64704	0.195153	0.182398	-128.565	130.245	3.88172	0.248413	0.239683	-62.7475	65.0404	4.31735	0.255564	0.132757	-131.257	164.207	1.20266	0.311604	0.332725	-72.9034	102.381	4.07043	0.210867	0.173978	-66.5184	78.0055	2.1067	0.230809	0.154567	-73.5266	90.5359	3.35325	0.193374	0.110683	63	25.2	-96.1872	97.8906	2.13133
-112.781	55.2287	1.33525	0.200473	0.106491	-164.248	76.6185	-3.03789	0.320024	0.281912	-85.2882	137.069	1.96412	0.197066	0.177934	-117.561	127.085	3.72056	0.246032	0.241799	-66.5568	63.6082	4.26459	0.252684	0.127782	-122.7	158.339	0.942487	0.307432	0.33455	-70.4064	99.5852	4.10093	0.213858	0.161515	-61.6026	75.8378	2.48022	0.227947	0.145719	-64.5404	87.6439	3.41173	0.192861	0.103493	64	25.6	-91.8822	95.9411	2.26815
-112.434	54.7257	1.69716	0.208587	0.101082	-162.485	77.1661	-2.43905	0.322444	0.285239	-77.7481	137.712	2.29409	0.200574	0.175064	-106.557	123.926	3.54181	0.244709	0.241799	-70.3662	62.176	4.22083	0.25216	0.122283	-116.804	152.47	0.650002	0.295958	0.332986	-67.9093	96.7896	4.12542	0.216351	0.14656	-57.0833	73.7527	2.85708	0.224044	0.131148	-55.5541	84.7519	3.46599	0.19209	0.0983564	65	26	-88.4539	94.4545	2.40634
-112.086	54.2503	2.05116	0.216024	0.0953347	-160.799	78.2392	-1.8627	0.326376	0.287659	-70.208	140.742	2.63808	0.200574	0.171237	-95.5526	121.872	3.36697	0.242857	0.237831	-74.1755	60.7438	4.17012	0.252422	0.115737	-118.064	146.722	0.4101	0.28605	0.326728	-65.4123	93.994	4.14162	0.219093	0.131854	-53.2199	71.6677	3.2299	0.222222	0.119178	-46.5679	81.8599	3.51186	0.187468	0.0932203	66	26.4	-86.237	93.0887	2.54319
-111.881	53.7749	2.40255	0.22211	0.0929682	-159.113	79.6861	-1.30561	0.326376	0.288264	-62.6679	143.884	2.98561	0.205676	0.166135	-92.4573	119.893	3.2037	0.240212	0.235714	-77.9849	59.3316	4.10481	0.251637	0.111286	-119.553	141.479	0.167306	0.279531	0.319948	-63.1736	91.1984	4.16797	0.217099	0.123131	-49.6893	69.5826	3.6057	0.21988	0.106948	-39.6127	78.9679	3.55663	0.181561	0.088341	67	26.8	-84.9521	91.873	2.66936
-111.793	53.5594	2.75304	0.228533	0.0892495	-157.427	81.133	-0.761702	0.327889	0.289171	-55.1278	147.027	3.32253	0.204401	0.161352	-92.2275	118.811	3.01978	0.238095	0.23254	-81.7942	58.0398	4.03847	0.251637	0.107096	-121.829	136.237	-0.119939	0.273272	0.315515	-61.3592	88.4028	4.16304	0.220837	0.113161	-46.7212	67.5712	3.98689	0.220921	0.0905543	-36.2897	76.0759	3.62214	0.176168	0.085773	68	27.2	-85.0221	91.0981	2.80895
-111.705	53.8836	3.10857	0.231913	0.0872211	-155.741	82.5799	-0.177225	0.325771	0.286449	-54.4953	150.17	3.65065	0.202487	0.156569	-93.8214	117.852	2.86945	0.235714	0.22672	-85.6035	59.3403	3.98953	0.24509	0.10343	-124.282	131.578	-0.371886	0.271708	0.317862	-59.9874	85.6072	4.19292	0.21984	0.107926	-43.9992	65.6881	4.34961	0.220661	0.0746812	-35.564	73.1839	3.66894	0.175912	0.0793529	69	27.6	-85.6681	90.6191	2.94982
-111.618	54.2078	3.46102	0.23428	0.0858688	-154.056	84.0867	0.388644	0.324561	0.284029	-54.7127	153.313	3.99001	0.207589	0.153061	-95.4154	117.43	2.69363	0.233069	0.223016	-89.4129	62.2415	3.95242	0.242734	0.100812	-126.858	126.95	-0.596864	0.271969	0.313429	-62.6364	82.9798	4.21031	0.218096	0.0989531	-41.2771	64.0718	4.7383	0.227947	0.0632319	-35.0271	70.2919	3.71094	0.179764	0.0770416	70	28	-86.887	90.2427	3.08347
-111.53	54.6961	3.80914	0.23597	0.0824882	-152.37	85.8675	0.961624	0.323654	0.278282	-57.0386	156.455	4.32994	0.211735	0.151467	-97.0093	117.008	2.49597	0.230952	0.217196	-93.2222	65.1428	3.8911	0.23933	0.0984551	-129.434	122.602	-0.854343	0.270404	0.308475	-67.9084	80.5568	4.2349	0.212363	0.0882353	-38.5549	62.4555	5.12717	0.236014	0.058548	-34.9158	67.3999	3.75569	0.184129	0.0742167	71	28.4	-82.5067	86.5703	3.07462
-108.021	54.4193	3.99156	0.237999	0.0835024	-146.762	83.736	1.03362	0.321234	0.278584	-57.3323	152.933	4.3115	0.213967	0.150191	-94.3163	113.062	2.40762	0.228836	0.210582	-87.9556	63.0327	3.93905	0.241686	0.0950511	-123.331	116.677	-0.757442	0.261278	0.29987	-62.2106	76.336	4.29302	0.205882	0.0770189	-34.04	57.316	4.94502	0.227687	0.0515222	-28.5916	61.6206	3.50763	0.1849	0.0724191	72	28.8	-78.9029	83.0431	3.06951
-104.511	54.25	4.17809	0.238337	0.0824882	-141.355	81.6043	1.11559	0.319117	0.279189	-58.319	149.41	4.31	0.211097	0.145089	-91.6232	109.116	2.27179	0.229101	0.204497	-82.6887	60.9224	3.98666	0.240639	0.0913852	-118.006	111.035	-0.634812	0.250326	0.281356	-56.5122	72.5186	4.3362	0.197408	0.0730309	-29.5249	52.3857	4.79021	0.218839	0.046318	-27.5867	56.1463	3.27186	0.181561	0.0701079	73	29.2	-76.3262	80.1058	3.06092
-101.002	54.0807	4.35961	0.239013	0.0821501	-136.311	79.6736	1.18055	0.317302	0.278887	-61.3937	145.887	4.28037	0.212691	0.142538	-88.93	105.639	2.14945	0.233333	0.200794	-77.4217	58.812	4.03953	0.244305	0.088243	-112.68	105.685	-0.506369	0.23807	0.2691	-51.1065	68.7699	4.4027	0.19342	0.0707876	-28.8629	51.492	4.61505	0.212074	0.0429352	-29.2286	50.9128	3.02742	0.178737	0.0675398	74	29.6	-74.0934	77.7849	3.05222
-97.4918	54.6156	4.5478	0.241041	0.081812	-131.267	78.0548	1.23965	0.313975	0.279492	-65.1478	142.364	4.25136	0.21301	0.138712	-86.2368	102.611	2.00778	0.234127	0.201587	-72.1547	56.7017	4.10844	0.247709	0.0840534	-107.355	100.335	-0.376866	0.221643	0.269622	-46.1954	65.0212	4.46006	0.196909	0.0700399	-29.5228	50.8283	4.42834	0.205829	0.0450169	-31.4698	49.5337	2.80345	0.178223	0.0665126	75	30	-71.9001	76.0154	3.04115
-93.9821	56.6068	4.73146	0.242732	0.0807978	-126.223	76.7233	1.30793	0.310647	0.280702	-68.9019	138.841	4.22314	0.211735	0.137755	-83.5436	99.5818	1.88366	0.232275	0.202646	-66.8877	54.5914	4.15901	0.252684	0.079602	-102.029	94.9844	-0.272669	0.219817	0.265711	-41.2843	64.1902	4.53241	0.207378	0.0710369	-30.4549	50.1646	4.24818	0.197502	0.0460578	-33.7938	48.4547	2.55723	0.174114	0.0680534	76	30.4	-69.8341	75.2899	3.03537
-90.4724	58.5979	4.91032	0.24307	0.0811359	-121.179	75.9385	1.38512	0.30853	0.280097	-72.6561	135.318	4.21571	0.210778	0.134247	-80.8505	96.553	1.7455	0.230688	0.207143	-61.6208	52.4811	4.19974	0.255041	0.074365	-97.701	90.1895	-0.123205	0.225293	0.266493	-36.3732	70.9343	4.58754	0.215105	0.0732802	-31.5362	49.7982	4.07353	0.19516	0.0478793	-36.1177	47.7984	2.3241	0.172573	0.075244	77	30.8	-68.7915	75.1783	3.02824
-86.9627	60.657	5.09238	0.243408	0.081812	-116.645	75.6056	1.4554	0.308227	0.280097	-76.4102	131.963	4.19611	0.208227	0.132015	-81.335	93.5243	1.63898	0.228571	0.208466	-56.3538	50.3707	4.2526	0.259754	0.0696517	-93.6171	86.2657	0.0038098	0.236767	0.266232	-36.7403	77.6786	4.65361	0.222084	0.0795115	-32.6176	53.0235	3.87415	0.195941	0.0546448	-38.4417	47.5165	2.08715	0.171546	0.0850026	78	31.2	-68.4073	75.2576	3.02659
-83.453	62.8222	5.2776	0.24307	0.081812	-112.215	75.2728	1.53294	0.303993	0.277677	-80.1643	128.692	4.17309	0.204082	0.128508	-84.3531	90.4956	1.54612	0.229365	0.208201	-51.0868	48.2604	4.31739	0.259492	0.0665096	-89.5332	83.8694	0.122502	0.244589	0.269361	-40.3959	84.4227	4.70679	0.225573	0.083998	-33.699	56.2488	3.71095	0.19516	0.0634921	-40.7656	47.2345	1.85188	0.169492	0.0942476	79	31.6	-68.4895	75.5467	3.00954
-79.9433	64.9875	5.4529	0.242732	0.081812	-107.785	74.94	1.5859	0.303085	0.275257	-83.9185	125.422	4.13654	0.202487	0.128189	-87.3712	87.4668	1.36102	0.230688	0.210317	-45.8198	46.1501	4.38302	0.260539	0.0646766	-89.6463	82.7125	0.233712	0.252412	0.276923	-44.0515	91.1669	4.79169	0.224826	0.0889831	-34.7803	59.5929	3.53136	0.197502	0.0723393	-43.0896	47.4822	1.60975	0.166667	0.104777	80	32	-68.6474	75.9287	2.99642
-76.4336	67.1528	5.63942	0.240365	0.0821501	-103.355	74.6856	1.65988	0.30006	0.274047	-87.6726	122.151	4.08467	0.201212	0.125957	-90.3892	84.6736	1.23226	0.229894	0.210317	-40.5528	44.0672	4.44276	0.264205	0.0631055	-90.4415	81.5557	0.348523	0.261538	0.282399	-47.7071	97.9111	4.82867	0.22657	0.0934696	-35.8616	63.2577	3.36637	0.196461	0.0801457	-45.4136	47.9038	1.36521	0.164355	0.112738	81	32.4	-66.925	73.3378	2.92798
-75.6348	65.6359	5.61423	0.241041	0.081812	-96.328	72.6447	1.59718	0.292498	0.273442	-86.3148	117.584	4.13055	0.201849	0.117028	-86.033	82.9116	1.26206	0.224339	0.204497	-39.1606	41.7719	4.26333	0.258445	0.0599633	-91.7269	81.0723	0.615053	0.259452	0.270926	-47.4853	91.7047	4.55369	0.225573	0.0942173	-34.3087	59.5462	3.07456	0.187874	0.0785844	-45.3324	47.168	1.24116	0.16076	0.105804	82	32.8	-65.3896	71.0196	2.85592
-74.836	64.1187	5.58884	0.240365	0.081474	-89.3013	70.9119	1.52443	0.286751	0.27193	-84.9566	113.018	4.16866	0.202806	0.115115	-81.6765	81.6132	1.2816	0.215873	0.197619	-37.7687	40.4212	4.10193	0.253993	0.0586541	-93.0124	80.5889	0.837025	0.263103	0.257888	-47.2634	86.2381	4.27753	0.222582	0.0942173	-34.4402	55.8343	2.79414	0.183971	0.0801457	-45.2511	46.4321	1.12913	0.156651	0.101181	83	33.2	-63.9105	68.8785	2.79125
-74.0373	62.6016	5.55891	0.240027	0.0801217	-82.5632	70.0067	1.44999	0.277374	0.268905	-83.5985	108.451	4.23598	0.205357	0.110651	-77.3199	80.6535	1.31721	0.20873	0.186508	-36.3767	39.3421	3.91953	0.250065	0.0583922	-94.2978	80.1056	1.07718	0.264668	0.248501	-47.0414	80.7714	4.02542	0.221834	0.0927218	-34.7899	52.1224	2.52878	0.176425	0.0835285	-45.1698	45.8521	1.00822	0.152286	0.096302	84	33.6	-62.4323	67.0887	2.72061
-73.2386	61.2088	5.53724	0.239013	0.0794456	-75.8329	71.1058	1.3647	0.268603	0.267998	-82.2404	103.884	4.30758	0.20727	0.109375	-72.9633	79.6937	1.35938	0.202381	0.182804	-34.9847	38.7049	3.74705	0.241686	0.0589159	-95.5832	79.6222	1.3129	0.270404	0.228422	-46.8195	75.3048	3.73557	0.218843	0.0934696	-35.1397	48.6601	2.23121	0.176685	0.088993	-45.0885	45.6136	0.889853	0.143554	0.0916795	85	34	-61.0335	65.4919	2.64999
-72.5764	59.9585	5.51291	0.238675	0.0801217	-69.1026	72.2513	1.28582	0.261041	0.270417	-80.8823	99.7687	4.35339	0.209821	0.107462	-68.8821	78.7339	1.38967	0.194974	0.182011	-33.5927	38.3476	3.58092	0.23514	0.0594396	-96.8687	79.1389	1.51709	0.274837	0.215645	-46.5975	69.8382	3.47096	0.215105	0.0924726	-35.4894	45.395	1.96376	0.173562	0.0934166	-45.3095	45.9953	0.775378	0.136877	0.0898819	86	34.4	-60.3155	64.3744	2.58425
-71.9262	58.8774	5.48588	0.239013	0.0804598	-62.3723	73.5879	1.20354	0.251966	0.265578	-79.5242	96.4783	4.42653	0.213967	0.104911	-64.8133	78.6605	1.43448	0.193651	0.180159	-36.2053	37.9903	3.40631	0.223619	0.0581304	-98.1541	78.6555	1.75006	0.281617	0.208344	-46.3755	65.9258	3.1999	0.209372	0.0944666	-35.8391	42.7751	1.6908	0.174343	0.0983607	-47.6293	46.4186	0.660719	0.127889	0.0914227	87	34.8	-60.2542	63.9537	2.51464
-71.2761	57.9905	5.4614	0.241041	0.0804598	-55.8196	75.204	1.13421	0.241682	0.261343	-78.7307	96.0006	4.46754	0.218431	0.103635	-60.7921	78.7617	1.46495	0.195503	0.174868	-42.0073	38.2751	3.23853	0.216549	0.0589159	-99.4396	78.1722	1.98349	0.28631	0.202608	-47.0325	62.8949	2.93772	0.202891	0.0962114	-36.8467	40.3871	1.40637	0.168098	0.103044	-50.3436	47.8968	0.537558	0.120699	0.0952748	88	35.2	-61.4029	64.4407	2.4409
-70.6259	57.5077	5.43193	0.241717	0.0797836	-51.5101	76.8202	1.05127	0.231397	0.256503	-78.0871	96.3316	4.53146	0.221939	0.101403	-60.7975	78.8642	1.49444	0.19709	0.172751	-47.8092	39.1052	3.05988	0.210003	0.0576067	-100.84	77.6888	2.18803	0.298044	0.2	-50.0035	62.1144	2.66629	0.1999	0.0994516	-39.8943	38.8692	1.12893	0.164455	0.11007	-53.0579	52.6652	0.415916	0.117617	0.102979	89	35.6	-63.3882	66.1404	2.36735
-69.9757	58.482	5.39263	0.240703	0.0787694	-50.1739	78.4363	0.97761	0.223533	0.254386	-77.4436	96.6985	4.59388	0.226084	0.101722	-64.9262	79.6298	1.51977	0.199471	0.169841	-53.6112	39.9352	2.88967	0.202147	0.0560356	-102.273	78.9349	2.40583	0.311604	0.206519	-52.9746	63.486	2.37396	0.196162	0.10344	-43.1813	40.1386	0.847103	0.166276	0.118137	-55.9337	59.5225	0.305698	0.119158	0.109399	90	36	-66.0404	69.1914	2.30106
-69.3255	59.5491	5.36082	0.239351	0.0780933	-53.0087	80.0609	0.903371	0.215366	0.254083	-76.8	97.7012	4.6664	0.224809	0.101722	-69.3808	80.8059	1.54811	0.202116	0.166402	-59.4131	41	2.73121	0.192459	0.0583922	-103.706	87.0079	2.63639	0.318905	0.213559	-57.382	65.3005	2.12535	0.190429	0.109172	-46.5319	44.5348	0.558651	0.164195	0.124902	-58.8157	66.7627	0.179225	0.121469	0.115562	91	36.4	-63.9904	66.0546	2.25079
-67.1009	59.8156	5.26208	0.239689	0.076741	-52.5767	78.5723	0.911807	0.207804	0.251361	-72.8103	96.0067	4.73129	0.223852	0.0978954	-73.0217	71.713	1.51427	0.198942	0.158466	-58.1747	40.2378	2.65961	0.189317	0.0641529	-96.2511	79.2584	2.51553	0.311082	0.205476	-55.3981	65.2709	1.98132	0.182203	0.107926	-46.1108	41.7299	0.547403	0.15821	0.113453	-54.4696	61.8871	0.133793	0.108885	0.112481	92	36.8	-62.1425	63.2853	2.20949
-64.8763	60.0821	5.16225	0.238675	0.0757268	-53.1863	77.0836	0.910229	0.205989	0.245917	-68.8205	94.4538	4.83143	0.222577	0.0931122	-76.6625	62.62	1.4829	0.200529	0.149735	-56.9361	41.2351	2.5973	0.188531	0.067557	-88.7959	72.9155	2.4184	0.300652	0.191917	-53.6493	65.2412	1.83919	0.174975	0.10668	-46.232	38.925	0.557189	0.149362	0.104346	-50.1233	57.0112	0.0865013	0.101181	0.106061	93	37.2	-60.6058	61.9819	2.16527
-62.6517	60.3485	5.06871	0.237999	0.0733604	-56.1645	75.5948	0.919637	0.208409	0.232607	-64.8307	92.9434	4.93155	0.221301	0.0883291	-80.3033	61.5391	1.46516	0.201323	0.138095	-55.6976	42.6837	2.52857	0.188793	0.069128	-81.3406	71.0524	2.28648	0.283703	0.185137	-51.9004	65.4203	1.67543	0.171236	0.109671	-46.3532	36.12	0.5766	0.142337	0.0936768	-46.2104	52.1353	0.0352624	0.0965588	0.0993837	94	37.6	-59.2674	60.8165	2.12348
-60.569	60.615	4.97007	0.236984	0.0703178	-59.8015	74.1061	0.915863	0.210224	0.225045	-60.8409	91.5073	5.01887	0.219069	0.0816327	-83.9441	60.763	1.43901	0.201323	0.123016	-54.4591	44.222	2.46136	0.189578	0.0701754	-73.8854	69.6847	2.19297	0.272229	0.178357	-50.2673	65.7204	1.53935	0.17323	0.115404	-46.8785	33.315	0.583097	0.136872	0.0861306	-42.7613	47.4153	-0.00930173	0.0937339	0.0965588	95	38	-58.3409	60.5457	2.08373
-58.5997	60.8815	4.86716	0.234956	0.0672752	-63.7183	72.6174	0.917403	0.214459	0.219903	-57.0355	90.824	5.12238	0.218431	0.0784439	-87.5849	59.987	1.43284	0.202381	0.117989	-53.2205	46.0702	2.40881	0.187222	0.0720084	-67.8936	68.484	2.08594	0.270926	0.175228	-49.6363	66.0205	1.39715	0.172732	0.116899	-48.0675	35.3789	0.589564	0.128285	0.0824876	-39.3121	44.6481	-0.0676507	0.0955316	0.0983564	96	38.4	-58.6536	60.378	2.04437
-56.6304	61.1482	4.76471	0.23428	0.0659229	-68.0771	71.1287	0.917317	0.216576	0.216576	-53.8097	90.5485	5.21436	0.214923	0.0727041	-91.2258	59.211	1.40817	0.205026	0.116402	-51.982	47.9184	2.3325	0.185651	0.0741032	-67.7633	67.2833	1.98624	0.274055	0.176793	-51.4836	66.3206	1.27498	0.172233	0.121635	-49.9975	37.4763	0.60163	0.127244	0.0814468	-36.9131	42.3671	-0.100581	0.0937339	0.107858	97	38.8	-59.1575	60.3382	1.99709
-54.661	61.5271	4.6593	0.230561	0.0649087	-72.897	69.64	0.907135	0.223533	0.208106	-50.5838	90.65	5.31435	0.211097	0.0711097	-94.8666	58.9069	1.38289	0.206349	0.121164	-50.7435	49.7968	2.27886	0.18277	0.0824823	-67.8405	66.0825	1.86255	0.274316	0.185398	-53.7966	66.6207	1.10486	0.171735	0.124128	-52.2786	39.5737	0.608632	0.128806	0.0822274	-34.75	40.2462	-0.144778	0.0937339	0.114022	98	39.2	-59.8321	60.4803	1.95234
-52.6917	61.9061	4.55899	0.230561	0.0645707	-77.9888	68.1513	0.897851	0.23049	0.205989	-47.358	90.953	5.41098	0.212054	0.0691964	-98.5074	59.8588	1.369	0.210847	0.12328	-49.5049	51.8545	2.20981	0.174915	0.0879811	-68.0277	64.8818	1.74939	0.274055	0.19322	-56.6224	66.9207	0.954138	0.16999	0.127866	-55.2011	41.6711	0.619137	0.133229	0.0921155	-32.5868	38.1253	-0.198252	0.0986133	0.119158	99	39.6	-60.7977	61.382	1.9115
-50.7385	62.285	4.46126	0.228195	0.0642326	-83.6862	66.6626	0.900102	0.236842	0.203872	-44.1322	91.3668	5.4997	0.209503	0.0672832	-102.148	60.8107	1.33613	0.213492	0.127513	-48.2664	53.9121	2.14576	0.168631	0.0950511	-68.2149	69.7221	1.65486	0.280574	0.204433	-60.1123	67.2208	0.826444	0.170987	0.135593	-58.3685	44.4531	0.614322	0.139995	0.104346	-31.5125	36.0044	-0.235067	0.10452	0.12378	100	40	-62.1755	63.0642	1.86479
-49.1936	62.6639	4.35563	0.226166	0.0632184	-89.3943	65.1738	0.910428	0.244404	0.206594	-41.0346	92.2612	5.61487	0.207908	0.0640944	-105.819	61.7625	1.30923	0.221164	0.135185	-47.0278	55.9697	2.06851	0.166012	0.10055	-68.8355	80.7043	1.53775	0.285267	0.219557	-63.6022	67.5208	0.655362	0.172483	0.143819	-61.5356	47.6378	0.611865	0.143378	0.116055	-33.137	33.8835	-0.280498	0.107345	0.126091	101	40.4	-60.2176	60.1145	1.81281
-46.4533	60.0254	4.23752	0.219405	0.0608519	-87.7121	61.4452	0.753671	0.243799	0.203569	-40.2142	89.1007	5.54192	0.209184	0.0605867	-102.716	55.483	1.18867	0.220106	0.137831	-43.1736	53.6184	2.14841	0.162084	0.0942655	-69.3473	78.3934	1.41871	0.27927	0.21043	-63.1058	62.8817	0.651594	0.171984	0.140329	-55.427	47.8033	0.593781	0.133489	0.108509	-33.8085	32.2795	-0.219004	0.102465	0.11736	102	40.8	-58.314	57.4691	1.75766
-43.8092	57.5215	4.1176	0.213658	0.0578093	-86.0575	57.8743	0.586327	0.242287	0.200847	-39.522	86.2867	5.47926	0.209503	0.0564413	-99.6439	51.126	1.053	0.216138	0.139418	-39.3194	51.2671	2.2125	0.153967	0.0869338	-70.066	76.0824	1.32019	0.275098	0.203911	-62.6094	58.2425	0.628641	0.170239	0.139581	-49.3185	47.9688	0.565876	0.129066	0.107728	-34.4801	30.8529	-0.144455	0.0968156	0.109142	103	41.2	-56.5895	55.1835	1.70166
-41.1651	55.0329	3.99003	0.207235	0.0534145	-85.8056	54.6612	0.423147	0.241984	0.196007	-38.8298	83.6506	5.41895	0.208865	0.0535714	-96.5715	48.6355	0.897245	0.214815	0.139418	-35.4652	49.1632	2.2869	0.150563	0.0816968	-70.9934	73.7715	1.18715	0.274837	0.201565	-62.113	53.6033	0.613646	0.169242	0.133848	-43.2099	48.2029	0.569366	0.126203	0.111371	-35.1517	29.9301	-0.0715171	0.0937339	0.100411	104	41.6	-54.8749	53.295	1.64862
-38.6108	52.5442	3.87521	0.202502	0.0513861	-85.5537	51.4481	0.272199	0.241077	0.196915	-38.1376	81.0145	5.34649	0.21014	0.0487883	-93.499	46.145	0.770065	0.213228	0.141799	-31.611	47.1163	2.35094	0.146373	0.0780309	-71.9207	71.4606	1.07003	0.275619	0.202608	-61.6167	49.4432	0.601566	0.166999	0.130857	-37.1014	48.8621	0.543265	0.120999	0.114494	-35.8233	31.6209	0.00779699	0.0896251	0.0934771	105	42	-53.8545	51.6181	1.59266
-36.0752	50.0556	3.75419	0.195402	0.0480054	-86.0295	49.5525	0.112007	0.245312	0.196915	-37.5634	78.3783	5.28576	0.208546	0.0459184	-90.4265	43.6546	0.631069	0.210053	0.142063	-29.5416	45.4593	2.41848	0.147421	0.0733176	-72.848	69.1497	0.943537	0.273012	0.202868	-61.1203	45.4798	0.568197	0.164506	0.130608	-34.5911	49.5213	0.530547	0.118918	0.117356	-36.4948	33.3118	0.0901664	0.0896251	0.0893683	106	42.4	-53.1938	50.3003	1.53901
-33.5397	47.7791	3.63256	0.193374	0.0436105	-86.7251	49.0318	-0.0523834	0.248034	0.194495	-37.0353	76.1267	5.21644	0.205995	0.0420918	-87.3541	41.1641	0.494026	0.201323	0.145238	-28.7434	43.8903	2.4896	0.147159	0.0688662	-73.7754	66.8388	0.808794	0.276923	0.205997	-60.6239	42.2546	0.5758	0.166002	0.134098	-33.7807	50.6148	0.52928	0.12152	0.119438	-37.1664	35.0026	0.157022	0.0896251	0.0850026	107	42.8	-52.5371	50.1841	1.48404
-31.0041	45.8719	3.51791	0.188979	0.0429344	-87.4206	48.6164	-0.212102	0.249244	0.191168	-36.5073	73.9068	5.15883	0.203763	0.0398597	-84.2816	40.4671	0.363408	0.196296	0.148942	-27.9453	45.1896	2.56	0.15161	0.0641529	-74.7027	64.5278	0.702127	0.278488	0.215124	-60.1275	44.645	0.55014	0.16675	0.139083	-32.9704	51.7385	0.494945	0.125943	0.125423	-37.8749	36.6934	0.221115	0.0916795	0.0837185	108	43.2	-52.1973	50.8235	1.42774
-28.4685	43.9646	3.38841	0.181542	0.0402299	-89.0852	50.8196	-0.371321	0.249849	0.18905	-35.9792	71.6868	5.09347	0.201849	0.0376276	-81.2091	41.2288	0.218305	0.190212	0.154497	-27.1471	47.8495	2.62744	0.153967	0.0581304	-75.63	62.2169	0.600881	0.287614	0.219035	-59.6312	48.2792	0.534365	0.168245	0.145065	-33.5082	52.9821	0.458387	0.130367	0.129846	-39.1168	38.3843	0.299719	0.0973292	0.0878274	109	43.6	-52.2189	51.5969	1.37406
-25.933	42.4863	3.28407	0.179851	0.0395538	-90.7976	53.413	-0.52721	0.249546	0.191773	-35.4511	69.4669	5.03259	0.202806	0.0401786	-78.1367	42.0163	0.0840608	0.186772	0.156878	-26.349	50.5093	2.70017	0.157371	0.0560356	-76.5574	59.906	0.469621	0.294394	0.228683	-59.1348	51.9134	0.506701	0.166002	0.151296	-37.2522	54.5862	0.435047	0.140515	0.131408	-40.3588	40.0751	0.381464	0.0991269	0.0911659	110	44	-52.3293	52.7313	1.32185
-23.3975	41.2809	3.17246	0.175794	0.0425963	-93.3092	56.5359	-0.670153	0.246219	0.191773	-34.923	67.2467	4.96524	0.202487	0.0414541	-75.0641	44.4097	-0.0565408	0.184656	0.162434	-25.5508	53.169	2.76531	0.162084	0.0526316	-77.4845	57.6602	0.337401	0.29987	0.234941	-58.6383	56.3237	0.489421	0.165753	0.160768	-40.9959	56.1899	0.430461	0.1465	0.138954	-41.6006	41.7657	0.46302	0.100668	0.0924499	111	44.4	-50.2434	49.4142	1.20598
-22.6157	39.6047	2.88873	0.169709	0.0473293	-90.0918	53.7774	-0.675658	0.242287	0.183303	-34.1825	62.6398	4.742	0.199617	0.0427296	-69.9492	41.1382	-0.0586175	0.176455	0.155556	-24.7907	52.872	2.6319	0.157109	0.0573449	-74.9401	51.8432	0.12792	0.27927	0.229726	-56.7242	51.7428	0.44972	0.156281	0.145813	-38.2196	52.0052	0.416066	0.135831	0.129586	-40.6767	39.1041	0.331746	0.0934771	0.0850026	112	44.8	-48.6008	46.4224	1.08451
-24.715	37.9286	2.63382	0.161596	0.0520622	-87.7611	51.159	-0.681771	0.237447	0.175741	-33.442	60.6645	4.50185	0.192602	0.0478316	-64.8343	37.8668	-0.0715192	0.17037	0.14709	-24.0306	52.575	2.48652	0.151872	0.0578686	-72.6177	46.0262	-0.107242	0.259974	0.229987	-54.81	47.1618	0.395884	0.14656	0.137338	-35.4433	47.8206	0.392803	0.126984	0.125683	-39.7527	36.5989	0.210223	0.0847458	0.0821777	113	45.2	-47.5645	43.7579	0.966086
-26.8144	36.633	2.37669	0.154496	0.0591616	-86.4763	50.3561	-0.703495	0.233212	0.162129	-36.9312	58.6892	4.25886	0.190051	0.0516582	-59.7195	34.5954	-0.0718023	0.164021	0.140212	-23.2704	52.5438	2.35457	0.146112	0.0576067	-70.2953	40.4891	-0.299851	0.241199	0.226597	-53.0777	42.7217	0.356283	0.138584	0.131854	-32.667	43.636	0.349846	0.121259	0.12178	-38.8288	34.1568	0.0736711	0.079096	0.0762712	114	45.6	-47.1898	41.9955	0.850737
-28.9138	35.3435	2.10531	0.153482	0.0655849	-86.3307	50.0035	-0.708036	0.224743	0.160315	-41.8177	56.7139	4.02668	0.189413	0.0548469	-54.6046	31.839	-0.0693508	0.158466	0.13836	-25.1959	52.5975	2.22252	0.145064	0.0562975	-67.973	38.0447	-0.499786	0.223729	0.219817	-51.9375	40.0103	0.30795	0.133101	0.128863	-30.0303	39.5941	0.3221	0.114754	0.119178	-37.9049	33.8129	-0.0507605	0.0729327	0.0747304	115	46	-47.3024	41.3414	0.735783
-31.0604	34.054	1.83706	0.150101	0.0706558	-86.8096	49.6508	-0.728922	0.216273	0.161525	-46.7043	54.7386	3.76947	0.18463	0.0644133	-49.4897	33.4737	-0.0499241	0.15291	0.137302	-27.2732	52.651	2.08644	0.14585	0.0594396	-65.6506	36.5683	-0.694698	0.204172	0.215645	-50.7973	40.0146	0.26877	0.128863	0.12662	-30.9553	35.8153	0.301137	0.108509	0.114754	-36.981	35.1064	-0.167287	0.0670262	0.0737031	116	46.4	-47.5866	41.2181	0.620526
-33.2237	33.2252	1.56921	0.147059	0.0757268	-87.7053	49.2982	-0.742337	0.213249	0.164852	-51.5908	53.4905	3.54297	0.184311	0.0698342	-44.3749	35.639	-0.0496194	0.146296	0.134921	-29.4944	52.7046	1.95524	0.147421	0.0628437	-63.3282	37.1453	-0.893545	0.200261	0.222164	-49.6571	40.019	0.227558	0.127866	0.129362	-32.3552	33.041	0.277258	0.107728	0.110851	-36.5499	36.3999	-0.30201	0.0618901	0.0721623	117	46.8	-48.1253	42.4407	0.505564
-35.3869	33.5865	1.31428	0.141988	0.0824882	-88.6336	48.9456	-0.767732	0.212644	0.168482	-56.4773	57.0896	3.3086	0.180166	0.0742985	-41.0094	37.8342	-0.054865	0.143386	0.136772	-32.1053	52.7582	1.81627	0.14873	0.0665096	-61.0059	39.1275	-1.07936	0.197132	0.224511	-48.575	40.0233	0.197044	0.130359	0.137587	-33.7552	34.9082	0.242513	0.107468	0.106948	-36.1791	37.6933	-0.426677	0.0600924	0.0747304	118	47.2	-49.3053	44.0149	0.390473
-37.5502	34.2229	1.05485	0.140297	0.0895876	-90.5975	48.593	-0.761757	0.209316	0.176346	-61.3639	61.116	3.05892	0.171556	0.0774872	-40.9293	40.5076	-0.0539021	0.142328	0.141005	-35.0552	52.8118	1.69034	0.149254	0.0699136	-58.6835	42.7262	-1.28992	0.197392	0.232855	-48.6043	40.3399	0.154109	0.135593	0.14332	-35.1552	36.7754	0.209251	0.104606	0.108509	-35.8083	39.0414	-0.547638	0.0652286	0.0898819	119	47.6	-50.8378	46.0769	0.271761
-39.7134	34.8594	0.789226	0.138269	0.0973631	-92.7437	48.2404	-0.788597	0.217483	0.180278	-66.9792	65.4977	2.81844	0.165816	0.0790816	-42.2419	43.1811	-0.0739915	0.140212	0.144444	-38.1891	52.8654	1.56066	0.14873	0.0748887	-56.3611	46.3249	-1.49497	0.194524	0.248761	-49.3189	44.441	0.122572	0.141326	0.145563	-36.5551	38.6427	0.189901	0.10981	0.105907	-35.4374	40.6394	-0.677386	0.0703647	0.103236	120	48	-53.1341	48.1871	0.1554
-41.8763	35.4955	0.514015	0.132522	0.104462	-94.8896	47.8876	-0.782125	0.219601	0.18542	-72.678	70.3159	2.55676	0.165816	0.0813138	-46.18	45.8541	-0.0581114	0.142328	0.151587	-41.5098	52.9189	1.42109	0.149777	0.0822205	-55.99	49.923	-1.68841	0.192699	0.259192	-51.4636	48.5416	0.080594	0.144816	0.153539	-38.1353	40.5097	0.159206	0.120479	0.10981	-35.4847	42.2373	-0.804418	0.0742167	0.123267	121	48.4	-50.7021	46.1916	0.0945493
-40.3771	33.4613	0.388199	0.128127	0.102772	-93.5392	45.291	-1.02301	0.217483	0.18542	-70.8943	65.0353	2.41864	0.162628	0.0790816	-43.2949	44.4399	-0.153998	0.134392	0.145767	-41.0197	51.935	1.41366	0.14585	0.0748887	-51.1366	47.5765	-1.56	0.183051	0.249283	-46.0973	47.7355	0.0380349	0.131605	0.145813	-35.8878	39.5842	0.168419	0.116315	0.102264	-34.072	40.6655	-0.838994	0.065999	0.11813	122	48.8	-48.8087	44.6423	0.0336226
-38.8779	32.2868	0.252505	0.122718	0.102772	-92.7854	45.0072	-1.27226	0.212039	0.183606	-69.1105	59.7547	2.27929	0.161033	0.078125	-42.2309	43.4267	-0.24628	0.127513	0.142063	-40.5296	51.1571	1.3959	0.13878	0.0665096	-48.01	45.2299	-1.43059	0.176271	0.243286	-41.4344	46.9294	0.0136931	0.121635	0.135842	-33.6404	38.895	0.18903	0.111371	0.0960187	-32.6594	39.0938	-0.878682	0.0608629	0.114022	123	49.2	-47.3088	43.3182	-0.0310452
-37.3787	31.451	0.12293	0.120352	0.102434	-92.3777	44.9954	-1.52651	0.205384	0.182093	-67.3268	54.4742	2.14224	0.162628	0.0765306	-42.8063	42.4135	-0.352825	0.120635	0.135714	-40.0395	50.7453	1.38998	0.13459	0.0607489	-45.8935	42.8834	-1.30374	0.168188	0.231291	-37.317	46.1233	-0.0214082	0.110917	0.130857	-31.3929	39.2556	0.197856	0.106948	0.0921155	-31.2468	37.522	-0.927929	0.0559836	0.110683	124	49.6	-46.054	42.3605	-0.0894425
-35.8794	31.4853	-0.0133178	0.115619	0.103448	-92.303	45.1213	-1.75107	0.200544	0.179976	-65.543	49.7442	1.96488	0.16773	0.0774872	-43.7427	41.4003	-0.422708	0.114286	0.128836	-39.5494	50.3334	1.36561	0.13171	0.0578686	-43.7771	40.5368	-1.16891	0.162712	0.220339	-34.099	45.3172	-0.0453454	0.102193	0.128863	-29.7085	40.8926	0.235665	0.104085	0.0921155	-29.8839	36.4138	-0.969779	0.0562404	0.11171	125	50	-45.0777	41.4852	-0.14744
-34.9207	31.5196	-0.137613	0.108181	0.104462	-92.9778	45.2472	-1.992	0.192075	0.175136	-63.7593	45.0499	1.83558	0.163584	0.0816327	-44.6791	40.3871	-0.517038	0.10291	0.122751	-39.0593	49.9216	1.36066	0.122545	0.0531553	-41.6607	38.5709	-1.03258	0.159844	0.21043	-31.6116	44.511	-0.0724947	0.0994516	0.124626	-28.4427	42.741	0.252236	0.103565	0.0981004	-28.5883	35.4189	-1.02371	0.0564972	0.112224	126	50.4	-44.2598	41.5997	-0.201733
-34.8526	31.5539	-0.250463	0.10311	0.105477	-93.9395	45.3731	-2.21384	0.19026	0.171204	-62.1581	45.1702	1.70453	0.156569	0.0829082	-45.6155	39.3739	-0.609246	0.100794	0.127513	-38.6088	49.5098	1.35106	0.118617	0.0523697	-39.5443	39.0717	-0.916297	0.157497	0.199218	-29.1241	43.7049	-0.0939464	0.100199	0.122881	-27.2027	45.4636	0.268982	0.109029	0.105126	-27.2926	35.1759	-1.05638	0.0559836	0.113508	127	50.8	-44.3387	42.3786	-0.263021
-34.7845	31.5882	-0.378775	0.0956728	0.104462	-95.0109	45.499	-2.46081	0.183908	0.174834	-61.0076	46.5995	1.54685	0.154974	0.0896046	-46.5519	38.5606	-0.699081	0.0989418	0.128571	-38.3605	49.0979	1.34389	0.119403	0.0526316	-40.7949	43.2917	-0.797379	0.161669	0.19661	-28.6948	42.8988	-0.112789	0.0982054	0.123131	-27.0543	48.3377	0.298496	0.118918	0.119958	-26.7888	35.5339	-1.1076	0.058038	0.116076	128	51.2	-45.1501	43.5743	-0.325653
-34.7163	31.6225	-0.497095	0.0838404	0.104801	-96.3098	45.6249	-2.70317	0.178463	0.178161	-59.8572	48.9125	1.40153	0.151467	0.0975765	-47.4883	38.0193	-0.794745	0.101058	0.131217	-38.1122	48.8995	1.33815	0.12176	0.0547264	-44.8852	47.7346	-0.682416	0.166623	0.197132	-28.9136	42.0927	-0.153514	0.102193	0.124128	-27.0194	51.2119	0.3233	0.138173	0.132449	-29.0485	38.0507	-1.16292	0.0626605	0.123267	129	51.6	-45.9732	44.8702	-0.383323
-34.6482	31.6568	-0.624933	0.0750507	0.105477	-97.6087	45.7507	-2.94599	0.172111	0.180278	-58.7068	51.2965	1.26434	0.151148	0.110013	-48.4247	37.4779	-0.887506	0.0994709	0.131481	-37.8639	49.0563	1.32535	0.12464	0.0560356	-49.0592	52.6537	-0.534263	0.173403	0.198175	-29.1324	41.2866	-0.192122	0.109172	0.130359	-26.9845	54.0861	0.346081	0.14676	0.143898	-31.3301	40.5675	-1.20086	0.067283	0.131998	130	52	-46.8915	46.5371	-0.443662
-34.6194	31.6907	-0.756036	0.0699797	0.106491	-98.9069	45.876	-3.18384	0.169994	0.184211	-57.5562	54.2146	1.12825	0.149235	0.121492	-49.3605	36.9364	-0.969279	0.0986772	0.137302	-37.6155	49.2127	1.29501	0.132757	0.060487	-53.5904	57.8957	-0.42519	0.18279	0.202347	-29.5585	42.9642	-0.221058	0.116899	0.139332	-27.1174	56.9597	0.387539	0.157169	0.156648	-33.6991	43.0837	-1.24836	0.0737031	0.139188	131	52.4	-44.7784	43.5371	-0.471169
-32.4384	28.6731	-0.804651	0.0659229	0.107505	-94.8106	41.6954	-3.28106	0.162432	0.187235	-55.2899	51.6689	1.16177	0.153699	0.120217	-45.4377	34.9103	-0.949416	0.0878307	0.128042	-37.3033	45.5646	1.19542	0.126473	0.0573449	-50.3019	54.062	-0.44898	0.176793	0.194263	-29.2681	39.0598	-0.247391	0.112662	0.132851	-26.6785	55.0579	0.361555	0.147541	0.145719	-31.4771	41.1419	-1.22777	0.0737031	0.1302	132	52.8	-43.1445	40.5807	-0.502988
-30.2971	25.6557	-0.8713	0.0601758	0.104801	-90.7143	37.7346	-3.38001	0.15971	0.190865	-53.0237	49.1233	1.19161	0.160714	0.120536	-41.515	32.8841	-0.926216	0.0801587	0.116402	-37.0349	41.9166	1.08832	0.124378	0.0591778	-47.0134	50.2448	-0.490181	0.171838	0.188005	-29.0516	35.3108	-0.273909	0.107428	0.131107	-27.0928	53.1561	0.349226	0.136092	0.138694	-32.5579	39.2002	-1.21443	0.0729327	0.125321	133	53.2	-41.6915	38.0054	-0.527262
-28.1634	22.6381	-0.926026	0.0530764	0.103448	-86.618	33.8827	-3.4713	0.16092	0.193285	-50.841	47.234	1.23027	0.161033	0.118622	-37.5923	30.8579	-0.89692	0.0690476	0.10582	-36.7665	38.2685	0.989623	0.122021	0.0612726	-43.7249	46.5813	-0.501305	0.162451	0.178357	-28.8368	34.0737	-0.309896	0.103938	0.128614	-29.0421	51.2542	0.334341	0.126464	0.130367	-33.6386	37.2584	-1.19415	0.0713919	0.11736	134	53.6	-40.3763	36.1247	-0.551353
-26.1862	19.6206	-0.967495	0.0480054	0.104462	-82.5218	32.8278	-3.56322	0.157895	0.196007	-49.5078	45.6492	1.26806	0.153699	0.115434	-33.6695	28.8317	-0.883742	0.0592593	0.0981481	-36.4981	37.0157	0.884046	0.12176	0.0665096	-40.6402	42.9178	-0.518839	0.149413	0.171317	-28.6219	33.5906	-0.352371	0.102692	0.125872	-31.0221	49.3524	0.329932	0.114754	0.113453	-34.7194	35.3166	-1.15855	0.0680534	0.108885	135	54	-39.4154	35.3665	-0.580381
-24.5205	16.6031	-1.02074	0.040906	0.103448	-78.5553	32.2788	-3.65576	0.15487	0.203267	-48.1746	48.7876	1.28708	0.151148	0.114796	-30.0847	26.8056	-0.851357	0.0544974	0.092328	-36.5204	38.4595	0.762412	0.12176	0.0699136	-37.6752	41.4305	-0.530534	0.132986	0.166884	-30.1702	33.1076	-0.383516	0.0987039	0.117896	-33.088	47.4506	0.312722	0.107208	0.105907	-35.9493	33.3748	-1.14375	0.0677966	0.106061	136	54.4	-39.3432	36.4393	-0.609631
-22.9163	16.0798	-1.08031	0.0388776	0.10311	-74.7092	31.7297	-3.75578	0.150938	0.208106	-46.8413	58.2636	1.32706	0.146684	0.112564	-33.3305	24.7794	-0.829378	0.055291	0.094709	-36.7077	39.9032	0.651852	0.122545	0.0759361	-34.7103	41.6363	-0.573576	0.122034	0.160365	-32.1393	32.6246	-0.418694	0.0974576	0.117896	-35.2398	45.5488	0.312929	0.106167	0.103825	-37.4943	37.3882	-1.12078	0.0703647	0.105547	137	54.8	-39.9343	37.6353	-0.637008
-22.0241	15.8416	-1.13048	0.0382015	0.100406	-71.1057	31.1807	-3.85378	0.14882	0.213249	-46.1478	67.8732	1.36679	0.143495	0.110332	-36.5763	22.7532	-0.819126	0.0592593	0.0949735	-36.8949	41.347	0.552546	0.123593	0.0801257	-33.8364	42.4322	-0.601713	0.122034	0.161147	-34.5614	32.1416	-0.44779	0.0937188	0.114905	-37.3916	43.647	0.296188	0.107728	0.104346	-40.8702	41.5016	-1.0957	0.0788392	0.105547	138	55.2	-41.1334	38.9641	-0.6661
-22.0256	16.188	-1.1825	0.0402299	0.100744	-69.64	30.884	-3.95257	0.144586	0.220508	-45.6452	77.4828	1.39883	0.139987	0.115753	-39.8221	20.7801	-0.796931	0.0626984	0.0939153	-37.0822	42.7908	0.432722	0.126735	0.0885048	-35.0802	43.228	-0.622523	0.125684	0.162973	-37.0675	31.6586	-0.471987	0.0947159	0.117398	-39.5435	42.0498	0.2831	0.114754	0.106948	-44.2943	45.6149	-1.08304	0.0860298	0.110426	139	55.6	-42.6847	40.9537	-0.690498
-22.153	17.1082	-1.23484	0.040906	0.0990534	-69.4241	32.5584	-4.05398	0.140351	0.227465	-45.3709	87.0924	1.44442	0.139987	0.120536	-43.0679	21.8189	-0.781543	0.0674603	0.0968254	-37.7172	44.2345	0.333686	0.126735	0.0953129	-37.2464	44.0585	-0.653828	0.1309	0.168188	-39.7696	31.1756	-0.498411	0.0977069	0.117398	-41.6953	40.8082	0.272898	0.125943	0.113453	-47.7183	49.7282	-1.04288	0.0947612	0.120442	140	56	-44.6418	43.4771	-0.725332
-22.2802	18.3378	-1.28665	0.0446247	0.0993915	-69.2301	36.7144	-4.14736	0.139141	0.234725	-45.2251	96.6991	1.46385	0.140306	0.121173	-46.3124	24.1118	-0.762901	0.0732804	0.101058	-38.4516	45.6775	0.21076	0.124902	0.106049	-42.5712	45.6548	-0.683871	0.138983	0.17236	-42.7182	30.692	-0.535041	0.101446	0.122881	-43.8465	39.5663	0.240691	0.141296	0.1223	-51.1409	53.84	-1.02747	0.102722	0.125835	141	56.4	-41.9422	39.9885	-0.771618
-21.8715	18.0762	-1.32906	0.035497	0.0960108	-65.466	33.2955	-4.19765	0.132486	0.233212	-42.0785	89.6825	1.20435	0.134885	0.123087	-42.0701	22.3153	-0.736205	0.0650794	0.0944444	-37.8628	42.3485	0.259568	0.122545	0.101597	-41.074	41.77	-0.801726	0.12412	0.166362	-38.3361	26.657	-0.548717	0.0922233	0.119641	-42.3148	36.7444	0.142146	0.126724	0.112672	-46.4059	49.007	-0.93726	0.0957884	0.120442	142	56.8	-39.4616	37.1788	-0.817273
-22.6898	17.8147	-1.37197	0.0283976	0.0949966	-61.7018	29.8767	-4.24137	0.124017	0.233817	-38.9321	82.6659	0.926286	0.129145	0.125	-37.8278	20.908	-0.718081	0.0568783	0.089418	-37.274	39.0195	0.302941	0.120189	0.100026	-39.5767	38.6441	-0.926465	0.110039	0.164537	-34.2886	26.8747	-0.565392	0.0857428	0.116899	-40.7831	34.3377	0.0624837	0.11033	0.104866	-42.08	44.4678	-0.823883	0.0903955	0.115819	143	57.2	-37.3837	35.2207	-0.862009
-23.6242	17.5531	-1.41671	0.0240027	0.0936444	-58.2651	28.7178	-4.2863	0.11585	0.230188	-35.7856	75.6492	0.675796	0.125319	0.129783	-33.5855	20.9161	-0.680104	0.0547619	0.0886243	-36.6852	35.6905	0.348551	0.118094	0.0966222	-38.0794	37.6249	-1.07234	0.10352	0.164798	-31.5096	28.3986	-0.568955	0.0787637	0.113908	-39.3608	32.5075	-0.0325242	0.0947177	0.103305	-39.5579	39.9287	-0.725487	0.0885978	0.112481	144	57.6	-36.2837	34.4067	-0.912778
-25.4488	17.2915	-1.45816	0.020622	0.0835024	-54.9222	28.4549	-4.33933	0.108893	0.228373	-33.6076	68.6326	0.3914	0.125638	0.133929	-33.2616	20.9242	-0.661239	0.0539683	0.089418	-36.0964	34.9393	0.376619	0.117046	0.0929563	-36.5822	42.4268	-1.19587	0.100391	0.163755	-31.1103	29.9224	-0.587646	0.0770189	0.110668	-38.0341	30.9497	-0.123054	0.0863908	0.104346	-37.4899	36.119	-0.617731	0.079096	0.108115	145	58	-35.6939	34.0302	-0.960667
-28.0407	17.0299	-1.4992	0.0189317	0.0770791	-51.5793	28.1927	-4.38642	0.103146	0.224138	-33.2271	61.616	0.128285	0.123087	0.140306	-33.7081	21.897	-0.647082	0.0616402	0.0957672	-35.5077	35.9276	0.423967	0.118356	0.0892904	-35.0849	47.2288	-1.32388	0.0988266	0.167405	-31.5996	31.4462	-0.601468	0.0785145	0.109172	-36.7074	30.1567	-0.225841	0.0819672	0.102004	-35.7901	32.7769	-0.514356	0.0770416	0.104006	146	58.4	-35.4457	33.875	-1.00844
-30.7838	16.7795	-1.54139	0.0169033	0.0740365	-48.4696	27.9305	-4.4503	0.091954	0.224138	-32.8466	54.825	-0.124808	0.11926	0.145089	-34.1547	23.5258	-0.617204	0.071164	0.104497	-34.9189	36.9159	0.467228	0.120189	0.0879811	-34.3513	52.0831	-1.46269	0.10013	0.176793	-33.6416	32.9701	-0.609266	0.0792622	0.109172	-35.3807	29.3637	-0.327471	0.0837887	0.105907	-34.4643	30.4816	-0.410066	0.0767848	0.0998973	147	58.8	-35.6209	34.7306	-1.05788
-33.5838	16.5294	-1.57426	0.015213	0.0740365	-46.3603	27.685	-4.48478	0.0771325	0.221113	-32.4661	48.3982	-0.406484	0.114796	0.152423	-34.6013	27.4615	-0.595308	0.0777778	0.114021	-34.3301	37.9043	0.505114	0.121236	0.0911233	-36.2521	57.4204	-1.60498	0.107692	0.189309	-35.7411	34.4939	-0.628008	0.083998	0.10668	-34.0541	28.8566	-0.422223	0.0905543	0.114494	-33.199	33.8259	-0.310017	0.0749872	0.0973292	148	59.2	-36.638	35.7836	-1.10816
-36.3838	16.2792	-1.61612	0.0131846	0.0736984	-47.7596	27.5739	-4.53237	0.0741077	0.222323	-35.3722	42.1059	-0.675087	0.111607	0.154018	-35.0478	31.722	-0.574504	0.0854497	0.124868	-33.8278	38.8926	0.545024	0.123854	0.0911233	-38.1529	62.7576	-1.74792	0.118644	0.201304	-37.9581	36.3123	-0.639214	0.0882353	0.109671	-32.7274	29.2331	-0.529851	0.0986209	0.119698	-32.5125	37.1757	-0.203399	0.075244	0.096302	149	59.6	-37.9361	37.3151	-1.15398
-39.1837	16.0291	-1.65964	0.0148749	0.0780933	-50.2549	27.4629	-4.57475	0.0713854	0.22323	-39.2815	39.4377	-0.936335	0.104273	0.158801	-35.4944	36.0266	-0.556545	0.0949735	0.132804	-33.4685	39.8809	0.589704	0.127258	0.0924326	-40.0538	68.0948	-1.87709	0.127771	0.217992	-40.175	38.1668	-0.648504	0.0907278	0.114158	-31.6876	30.2119	-0.624653	0.104606	0.13427	-31.826	40.5255	-0.0980001	0.0742167	0.0921931	150	60	-39.8888	39.4881	-1.20209
-41.9828	15.7784	-1.70316	0.0165652	0.0831643	-52.7497	27.3515	-4.6266	0.0756201	0.225045	-43.9105	40.4346	-1.20509	0.100765	0.159439	-35.9409	40.35	-0.518445	0.104497	0.143122	-33.5005	40.8688	0.632687	0.127258	0.0958366	-41.9533	73.4299	-1.98716	0.140808	0.23103	-42.3908	40.0201	-0.669056	0.0954636	0.122881	-35.432	33.2857	-0.733481	0.117616	0.14676	-31.1388	43.8738	-0.00851404	0.0744735	0.0898819	151	60.4	-39.2234	36.4743	-1.215
-40.2838	12.6092	-1.71205	0.00912779	0.0720081	-53.2961	25.4406	-4.64891	0.0659407	0.225348	-44.6565	38.1604	-1.31086	0.096301	0.15338	-36.359	36.5844	-0.674689	0.097619	0.14127	-32.3731	39.6944	0.6067	0.124902	0.0947892	-42.8806	68.2516	-1.93155	0.130117	0.226597	-39.3092	36.0166	-0.6371	0.0882353	0.115902	-33.823	31.1954	-0.658101	0.111892	0.136612	-30.0293	40.316	0.0315326	0.0724191	0.0819209	152	60.8	-39.3173	33.9732	-1.22275
-38.5848	10.6136	-1.71416	0.0010142	0.0689655	-53.9504	23.5297	-4.66992	0.0586812	0.223835	-45.6891	39.0516	-1.41251	0.0921556	0.146684	-37.1904	32.8188	-0.829422	0.0886243	0.139418	-31.4964	38.52	0.585578	0.119403	0.0890285	-44.1074	63.0733	-1.87301	0.125424	0.222686	-36.2275	32.0132	-0.604204	0.0854935	0.111914	-35.8536	29.105	-0.572346	0.110851	0.133229	-30.7562	37.0339	0.0852371	0.0701079	0.0719055	153	61.2	-39.5818	32.0685	-1.23018
-36.9787	9.40283	-1.72231	0	0.0676133	-54.6048	21.7355	-4.68028	0.0553539	0.225348	-47.6739	40.6457	-1.50209	0.0867347	0.143176	-38.2129	30.348	-1.00053	0.0809524	0.13254	-30.6197	37.3456	0.576168	0.116261	0.0816968	-45.3343	57.895	-1.8086	0.118905	0.213038	-33.1458	28.259	-0.594898	0.0862413	0.110419	-38.1825	29.2332	-0.481315	0.111632	0.128545	-31.4831	33.7519	0.14221	0.0657422	0.0642013	154	61.6	-39.9305	30.7925	-1.23697
-35.3837	8.29929	-1.72751	0	0.0703178	-55.2592	20.0839	-4.69341	0.0556564	0.22807	-50.1135	42.2397	-1.58716	0.0876913	0.139668	-39.2354	30.7596	-1.16412	0.0804233	0.132011	-29.743	36.1711	0.545597	0.113119	0.0819586	-46.5612	52.7167	-1.73163	0.118644	0.202608	-30.0642	26.6568	-0.564942	0.083001	0.110169	-40.8045	29.7359	-0.399146	0.114494	0.128025	-32.2101	30.4699	0.189578	0.0629173	0.0626605	155	62	-40.4022	30.2612	-1.24831
-33.7886	8.3293	-1.73509	0	0.0723462	-55.9135	21.7655	-4.72168	0.0565638	0.228978	-52.6064	43.8338	-1.68138	0.0892857	0.140306	-40.2579	31.1711	-1.33975	0.0783069	0.136508	-29.0803	34.9967	0.532799	0.112071	0.0837916	-47.788	47.5384	-1.65926	0.119687	0.201043	-27.5641	25.4668	-0.553279	0.087986	0.109172	-43.684	32.0615	-0.314097	0.119438	0.127765	-32.937	27.1878	0.236915	0.0626605	0.059322	156	62.4	-41.585	30.5885	-1.25377
-32.1936	8.35931	-1.73414	0	0.0750507	-56.6447	23.6087	-4.73694	0.0562613	0.233212	-55.7345	45.4279	-1.74307	0.0870536	0.143495	-41.2804	31.5826	-1.51357	0.0791005	0.143915	-32.0493	33.9792	0.523016	0.108929	0.0856245	-49.0149	47.7865	-1.58808	0.123598	0.196349	-27.1202	24.2768	-0.533237	0.0897308	0.110917	-46.5634	36.0294	-0.234044	0.124122	0.125943	-33.6639	24.2464	0.276152	0.0629173	0.0557268	157	62.8	-42.8215	31.7026	-1.2592
-30.5986	8.67506	-1.73318	0	0.0801217	-57.4349	25.7017	-4.75664	0.0559589	0.238959	-58.8627	47.022	-1.84608	0.0838648	0.150829	-42.6796	31.9941	-1.66053	0.0785714	0.147354	-35.0184	35.2212	0.499689	0.106572	0.0892904	-50.2418	50.0255	-1.51078	0.127249	0.199478	-26.7241	23.8745	-0.506978	0.0917248	0.116152	-49.4429	39.9972	-0.147187	0.126203	0.136352	-34.3908	22.8124	0.32888	0.0724191	0.0518747	158	63.2	-44.2588	33.5446	-1.2688
-29.0036	11.2872	-1.74129	0.0020284	0.091616	-58.2251	28.0917	-4.7649	0.0568663	0.238355	-61.9908	48.6161	-1.9475	0.0889668	0.161671	-44.336	32.5879	-1.82248	0.0822751	0.156878	-37.9874	36.4799	0.491199	0.108143	0.0947892	-51.4686	52.2644	-1.45486	0.134289	0.200261	-27.7129	24.6453	-0.486324	0.0922233	0.119392	-52.3224	43.965	-0.0726658	0.129586	0.142077	-35.2821	23.9641	0.379623	0.0731895	0.0541859	159	63.6	-46.2396	36.2214	-1.27864
-29.6388	13.8994	-1.74583	0.00946586	0.0990534	-59.2524	30.4818	-4.78162	0.0583787	0.240169	-65.1189	50.2101	-2.05347	0.0921556	0.166773	-45.9924	33.4651	-1.97502	0.0846561	0.162169	-41.1878	40.1568	0.469416	0.111024	0.100812	-52.6955	54.5034	-1.37184	0.143677	0.203911	-30.8605	28.3179	-0.477334	0.0979561	0.125872	-55.2019	47.9329	0.00287993	0.135311	0.148061	-36.208	27.0251	0.425095	0.0762712	0.0572676	160	64	-48.4959	39.3611	-1.2833
-32.1736	16.9131	-1.74195	0.0162272	0.108857	-60.3699	32.871	-4.79935	0.0577737	0.23654	-68.3775	51.8025	-2.14193	0.0950255	0.169962	-48.0142	34.3424	-2.12236	0.0904762	0.16746	-44.3873	45.0507	0.456927	0.11338	0.104739	-53.9211	56.7408	-1.30471	0.155932	0.205476	-34.0068	32.7638	-0.454023	0.103938	0.131854	-58.08	51.8992	0.0838928	0.142857	0.153786	-37.1331	31.8668	0.473799	0.0811505	0.0600924	161	64.4	-46.0404	37.1575	-1.27456
-31.0527	15.2902	-1.75083	0.0118323	0.104801	-57.5837	31.6086	-4.53071	0.0505142	0.23049	-64.6857	46.2273	-2.26805	0.0924745	0.169324	-45.9546	35.9249	-2.02363	0.0925926	0.166138	-42.2976	42.7688	0.432181	0.110762	0.101859	-49.8023	52.7454	-1.33951	0.145502	0.201043	-32.4485	29.9967	-0.472659	0.0964606	0.126122	-55.4618	49.8321	0.0718607	0.141556	0.14598	-35.0769	30.0237	0.410299	0.0716487	0.056754	162	64.8	-43.7706	35.0282	-1.26894
-29.9319	13.8201	-1.76392	0.00946586	0.10311	-54.7974	30.3463	-4.28641	0.0517241	0.222928	-61.2674	40.6522	-2.42557	0.0876913	0.176339	-43.895	37.5073	-1.91517	0.0910053	0.16455	-40.699	40.4869	0.402099	0.104739	0.100026	-45.6835	48.7501	-1.35024	0.144198	0.195306	-31.0485	27.2297	-0.487385	0.0912263	0.117896	-52.8436	47.7649	0.0673382	0.136612	0.137653	-33.7689	28.6966	0.338762	0.0588084	0.0557268	163	65.2	-42.1858	33.454	-1.26258
-28.811	12.5782	-1.76049	0.00777552	0.0956728	-52.0112	29.0839	-4.02887	0.0529341	0.214459	-58.1816	35.0771	-2.57585	0.0825893	0.186862	-41.8354	39.0898	-1.80506	0.092328	0.166138	-39.1004	38.2832	0.376391	0.103168	0.0945274	-44.9693	44.7547	-1.3993	0.137158	0.18957	-29.737	26.4255	-0.503496	0.0827517	0.110668	-50.2253	45.9306	0.0567426	0.133229	0.135311	-34.801	29.8628	0.276724	0.0493066	0.0539291	164	65.6	-40.9367	32.3556	-1.2568
-27.8395	12.1894	-1.76335	0.00709939	0.0909398	-49.2249	29.0762	-3.78489	0.0574713	0.205989	-55.0958	30.9068	-2.74118	0.0800383	0.192283	-40.0492	40.6722	-1.70297	0.0931217	0.163228	-38.9453	36.1971	0.368927	0.0992406	0.0892904	-44.6536	40.7594	-1.43842	0.129074	0.189309	-28.4254	25.9394	-0.519802	0.078016	0.106431	-47.6071	44.261	0.0681945	0.130887	0.126724	-36.5895	31.1986	0.202299	0.047509	0.0518747	165	66	-40.2887	32.131	-1.24728
-28.2243	12.2329	-1.7591	0.00574713	0.0862069	-46.4387	29.277	-3.5343	0.0641258	0.19873	-52.0101	33.3394	-2.8864	0.0774872	0.198661	-38.3693	42.2547	-1.59211	0.0944444	0.162963	-39.6466	34.3271	0.345262	0.0995025	0.0861482	-44.3379	36.764	-1.47782	0.120469	0.188266	-30.2047	25.8068	-0.516076	0.0760219	0.105434	-44.9889	42.5913	0.0695686	0.124382	0.119178	-38.378	32.5858	0.125426	0.0529019	0.0552131	166	66.4	-39.9934	32.3978	-1.24111
-30.2347	12.3078	-1.77628	0.00540906	0.0838404	-43.7589	29.4777	-3.28084	0.0719903	0.205687	-49.2929	35.7721	-3.00997	0.0704719	0.204719	-37.0936	43.8371	-1.50045	0.100265	0.165608	-40.3479	33.0466	0.3096	0.0997643	0.0853627	-44.0222	35.3589	-1.51488	0.111082	0.185137	-32.6533	26.7118	-0.534755	0.0735294	0.100449	-42.3707	40.9217	0.0723232	0.119698	0.112672	-40.1665	34.1464	0.0652379	0.0600924	0.0606061	167	66.8	-40.042	33.4642	-1.23639
-32.2451	12.5618	-1.77116	0.00540906	0.0824882	-41.1879	29.6785	-3.02965	0.0822747	0.208711	-48.3585	38.2047	-3.16784	0.0688776	0.206633	-36.3051	45.4196	-1.39995	0.107672	0.172487	-41.0491	35.159	0.282598	0.101335	0.0845771	-43.7065	37.3302	-1.56109	0.109518	0.183051	-35.3631	27.8653	-0.553583	0.0697906	0.0972084	-40.2074	39.2521	0.0841195	0.116836	0.111892	-41.955	35.7069	-0.0109204	0.0680534	0.0675398	168	67.2	-40.4478	34.8836	-1.23332
-34.2555	12.9462	-1.77762	0.00608519	0.0848546	-38.617	29.8792	-2.77421	0.0901391	0.217786	-47.9625	40.6374	-3.3376	0.0679209	0.209503	-36.1493	47.002	-1.30002	0.118519	0.180159	-41.7504	37.2714	0.26182	0.10343	0.0871956	-43.3908	41.4142	-1.60511	0.112125	0.183833	-38.6071	29.9523	-0.56532	0.0697906	0.0969591	-39.5538	37.5825	0.0777783	0.116055	0.113713	-43.7435	37.2675	-0.0795614	0.0780688	0.0808937	169	67.6	-41.8323	36.6934	-1.22551
-36.2659	13.5009	-1.7748	0.00676133	0.0882353	-36.0461	30.2672	-2.51536	0.100423	0.221718	-48.3539	43.07	-3.47636	0.0707908	0.214286	-41.5285	48.5845	-1.20219	0.127249	0.18836	-42.4517	39.3838	0.239672	0.107096	0.0919089	-44.1922	46.6334	-1.64853	0.111604	0.185658	-41.8784	32.5459	-0.579442	0.0745264	0.0977069	-40.2424	37.4269	0.0662816	0.117877	0.116576	-45.532	38.8281	-0.13882	0.085773	0.0924499	170	68	-44.519	38.8831	-1.21949
-38.2749	14.2005	-1.77457	0.010142	0.091954	-33.6818	32.757	-2.26779	0.112523	0.224743	-52.9192	45.5011	-3.62405	0.0717474	0.218431	-48.0501	50.1655	-1.09704	0.140212	0.19418	-43.1522	41.495	0.210964	0.112857	0.0966222	-49.8287	51.8496	-1.67954	0.112647	0.189048	-45.8645	35.222	-0.589776	0.081007	0.100947	-41.5011	38.3689	0.0586288	0.119958	0.12204	-47.3984	40.3879	-0.212201	0.0924499	0.0991269	171	68.4	-42.9963	36.4499	-1.23273
-35.4647	13.1982	-1.71056	0.00608519	0.0882353	-33.3412	30.9793	-2.33332	0.104356	0.228373	-52.6101	42.4296	-3.67153	0.065051	0.221939	-50.1792	46.733	-1.10722	0.127778	0.190212	-40.9367	39.2966	0.182152	0.106049	0.0932181	-47.2255	46.6853	-1.60209	0.106389	0.185658	-44.8374	33.1467	-0.523857	0.0737787	0.0889831	-37.3152	36.2596	-0.0280377	0.105907	0.120479	-45.0563	39.3207	-0.300147	0.087057	0.0986133	172	68.8	-41.5272	34.5126	-1.24757
-32.6837	12.59	-1.64779	0.0040568	0.0851927	-33.0645	30.5014	-2.38211	0.099516	0.232002	-52.301	39.3581	-3.71297	0.0570791	0.224809	-52.3083	45.2788	-1.12232	0.120899	0.181217	-38.7213	37.2242	0.1441	0.101074	0.0895522	-44.6224	41.521	-1.51572	0.0996089	0.18279	-44.0539	31.1224	-0.464517	0.0720339	0.082004	-33.1962	34.7642	-0.154615	0.101743	0.119178	-42.7932	38.2536	-0.372192	0.0808937	0.100411	173	69.2	-40.2314	32.6933	-1.26425
-29.9914	11.9818	-1.58135	0.00270453	0.086545	-33.0952	30.6117	-2.44648	0.0986086	0.23412	-51.992	36.2866	-3.74872	0.0538903	0.223852	-54.4374	44.0201	-1.1384	0.112698	0.174868	-36.5058	35.2557	0.0996394	0.0950511	0.0877193	-42.0193	36.3566	-1.44409	0.0985658	0.17236	-43.5339	29.0982	-0.412625	0.0712861	0.0775174	-29.9778	33.442	-0.245585	0.0967994	0.118657	-40.5301	37.1864	-0.460614	0.0749872	0.101695	174	69.6	-39.2569	31.1567	-1.27749
-27.2992	11.5227	-1.5202	0.0020284	0.0835024	-33.2054	30.722	-2.50335	0.0973987	0.2317	-51.6829	33.2151	-3.80315	0.049426	0.22449	-56.5665	42.9822	-1.13228	0.0968254	0.162698	-34.2904	33.2873	0.0656115	0.0937418	0.0837916	-40.4471	32.6249	-1.37774	0.0967405	0.166362	-43.0139	27.074	-0.344374	0.0777667	0.0740279	-28.54	32.8633	-0.334737	0.092636	0.119698	-38.267	36.1193	-0.547218	0.0695942	0.104777	175	70	-38.9645	30.2034	-1.29334
-24.607	11.237	-1.45435	0.00135227	0.081812	-33.3156	31	-2.56504	0.0967937	0.232305	-51.3738	30.1436	-3.86004	0.0487883	0.230548	-58.6956	42.4932	-1.14951	0.0910053	0.151587	-32.0749	31.3188	0.0348964	0.091647	0.0798638	-43.0475	32.1297	-1.28778	0.102477	0.160887	-43.0618	25.5067	-0.284754	0.0837488	0.0737787	-27.9191	32.9493	-0.460016	0.0887328	0.125423	-36.5849	35.0521	-0.613496	0.0644581	0.10529	176	70.4	-38.951	29.4806	-1.31172
-21.9784	10.9514	-1.39566	0.0010142	0.0787694	-33.6899	31.3211	-2.63166	0.0949788	0.231095	-51.0648	27.0721	-3.92589	0.0497449	0.227997	-60.8247	42.3865	-1.15262	0.0859788	0.148148	-30.0098	29.3503	-0.0181791	0.0871956	0.0822205	-45.9534	31.6344	-1.21607	0.112125	0.16193	-43.1694	25.3979	-0.228986	0.0864905	0.0705384	-28.4875	33.2268	-0.544753	0.090294	0.13375	-35.3808	33.985	-0.691681	0.0603493	0.105033	177	70.8	-39.6563	29.6626	-1.3194
-21.1964	10.6657	-1.32914	0.000338066	0.0730223	-35.8209	31.6423	-2.69374	0.0949788	0.230188	-50.7667	28.1646	-3.96983	0.046875	0.225446	-62.9538	42.8532	-1.16797	0.0812169	0.139947	-28.0579	28.1459	-0.0689704	0.083006	0.0877193	-49.1992	31.1391	-1.11834	0.124641	0.164276	-43.6218	27.8274	-0.15231	0.0924726	0.0722832	-29.7772	33.5043	-0.623852	0.0874317	0.140515	-35.5124	33.0209	-0.750477	0.0585516	0.101952	178	71.2	-40.8843	30.6035	-1.33945
-23.1056	10.3801	-1.27002	0.000338066	0.0757268	-38.2042	31.9634	-2.75842	0.0964912	0.22565	-50.9675	30.4067	-4.03804	0.0503827	0.222577	-65.0829	43.32	-1.17914	0.0809524	0.134656	-26.106	29.0761	-0.102911	0.0811731	0.0908615	-52.445	30.6439	-1.04392	0.136115	0.167145	-44.47	31.9881	-0.106504	0.0979561	0.0740279	-31.3966	33.8405	-0.721734	0.0871715	0.142597	-36.1805	33.8124	-0.834352	0.0585516	0.102465	179	71.6	-42.3182	32.258	-1.35077
-25.2141	10.8219	-1.20338	0.00236646	0.0780933	-40.5876	34.3021	-2.8182	0.0967937	0.22565	-51.1682	32.8256	-4.0692	0.0554847	0.222895	-67.3269	43.7867	-1.17787	0.078836	0.133598	-25.0393	30.5698	-0.133517	0.0741032	0.0955748	-55.6908	30.1486	-0.966071	0.146023	0.169231	-45.6766	36.1487	-0.055955	0.101446	0.0805085	-33.3118	34.669	-0.82646	0.0884725	0.145719	-36.8486	37.0495	-0.906312	0.0624037	0.102465	180	72	-44.0053	34.4031	-1.36681
-27.3218	12.7849	-1.13879	0.0125085	0.0794456	-42.9801	37.9094	-2.87253	0.0989111	0.225045	-51.3682	35.3821	-4.14483	0.051977	0.215242	-69.7561	44.2526	-1.19264	0.0814815	0.134921	-25.9908	32.0628	-0.178671	0.0725321	0.0984551	-58.9341	31.1478	-0.890223	0.156975	0.168449	-46.9205	40.3068	0.013048	0.10668	0.083998	-35.2253	35.4962	-0.910404	0.0934166	0.151184	-37.5504	40.285	-0.986236	0.0642013	0.106831	181	72.4	-42.1267	32.4161	-1.3335
-27.0241	12.7481	-1.14719	0.00642326	0.0750507	-39.3978	36.6527	-2.7643	0.0913491	0.218391	-49.1518	33.0306	-3.9815	0.0481505	0.204719	-66.3759	42.1475	-1.27277	0.0746032	0.134392	-27.1611	31.1811	-0.0789294	0.0727939	0.0895522	-54.5816	28.5923	-0.883625	0.14472	0.163233	-47.1411	36.6182	-0.0453776	0.0992024	0.0775174	-32.4679	32.4141	-0.87586	0.0892532	0.141556	-35.8388	38.3603	-0.951948	0.0603493	0.102722	182	72.8	-41.0528	30.6377	-1.29165
-26.7263	12.8856	-1.15952	0.00507099	0.0665991	-37.8771	35.3959	-2.6483	0.0877193	0.215366	-46.9354	30.679	-3.77583	0.0430485	0.199298	-62.9956	40.0424	-1.34755	0.0706349	0.138095	-28.3314	30.2994	0.0318274	0.0714847	0.0851008	-50.2291	27.4739	-0.874831	0.138722	0.159061	-47.3617	32.9296	-0.0671453	0.0947159	0.0720339	-32.7777	29.5975	-0.862521	0.0905543	0.136872	-36.241	36.4356	-0.920992	0.0544427	0.0991269	183	73.2	-40.0925	28.9166	-1.25627
-26.4286	13.0232	-1.17028	0.0040568	0.0544287	-36.3564	34.1391	-2.54144	0.0852995	0.213551	-44.7189	28.3275	-3.62717	0.0398597	0.190051	-59.6154	37.9373	-1.42562	0.0690476	0.141005	-29.5017	29.4177	0.137769	0.0712228	0.0793401	-46.2222	26.4639	-0.856185	0.122295	0.156714	-47.5823	29.4725	-0.107681	0.0932203	0.0707876	-33.0876	26.9569	-0.825799	0.0913349	0.130107	-37.3194	34.5109	-0.889983	0.0526451	0.0968156	184	73.6	-39.2196	27.6996	-1.21969
-26.1308	13.1607	-1.17325	0.00473293	0.0551048	-34.8357	32.9475	-2.43098	0.0840895	0.207804	-42.5453	27.2035	-3.45636	0.0382653	0.186543	-56.2352	35.8322	-1.51183	0.0656085	0.143386	-30.6719	28.536	0.247536	0.0735795	0.0772454	-42.7352	26.8459	-0.844095	0.116819	0.153585	-47.8029	27.8012	-0.162679	0.0924726	0.0705384	-33.3975	24.3163	-0.790001	0.0897736	0.124902	-38.6215	32.653	-0.855538	0.0498202	0.0945044	185	74	-38.6471	27.7847	-1.18108
-25.8331	13.2982	-1.17685	0.00439486	0.0530764	-33.315	31.7905	-2.30149	0.084997	0.205384	-40.7247	28.0866	-3.294	0.0392219	0.183992	-52.8549	35.9448	-1.58559	0.0677249	0.141534	-31.8422	28.8967	0.348867	0.0764598	0.0772454	-41.3984	27.4004	-0.848159	0.119166	0.151239	-48.0235	28.2066	-0.201713	0.0909771	0.0725324	-33.7073	24.5263	-0.746596	0.0895134	0.123341	-40.1246	31.9118	-0.824154	0.0464818	0.0929635	186	74.4	-38.2659	28.6687	-1.14816
-25.5353	13.7082	-1.1858	0.00473293	0.0534145	-31.7943	30.6334	-2.20247	0.0837871	0.206594	-38.904	28.9696	-3.14608	0.0411352	0.181441	-49.4747	38.6256	-1.67199	0.0703704	0.146032	-33.0125	30.3805	0.444977	0.0845771	0.0759361	-41.3538	28.1843	-0.838633	0.124902	0.151499	-48.2442	29.6946	-0.240107	0.0914756	0.0757727	-34.0172	25.4467	-0.708217	0.0892532	0.118657	-42.0573	32.375	-0.785129	0.0467386	0.0932203	187	74.8	-38.2873	29.5822	-1.10967
-25.2376	14.1613	-1.20226	0.0040568	0.0557809	-30.2735	29.4763	-2.08339	0.0828796	0.201452	-40.2208	29.8527	-2.98464	0.0446429	0.173788	-46.0944	41.3063	-1.7423	0.0738095	0.151323	-34.1827	31.8644	0.557686	0.0919089	0.0746269	-41.5959	28.9682	-0.832562	0.132464	0.153846	-48.4648	31.1826	-0.278967	0.0904786	0.0852443	-34.5257	26.5904	-0.668372	0.088993	0.117616	-43.9899	32.8381	-0.752241	0.0521315	0.0929635	188	75.2	-38.6931	30.6681	-1.07488
-24.9398	14.6144	-1.21324	0.0040568	0.0591616	-28.8168	28.3192	-1.95961	0.084997	0.19873	-42.0445	30.7357	-2.82582	0.0513393	0.166135	-44.7054	44.1983	-1.82691	0.0791005	0.156614	-35.4962	33.3482	0.654682	0.104216	0.0767217	-41.8379	29.7521	-0.81368	0.136636	0.159583	-49.323	32.6706	-0.318492	0.0912263	0.0917248	-35.1514	29.0732	-0.641305	0.0913349	0.118657	-45.9226	33.3013	-0.72959	0.0564972	0.096302	189	75.6	-40.5141	31.7702	-1.03822
-24.6421	15.0675	-1.22241	0.00473293	0.0608519	-27.4609	27.2033	-1.84649	0.0883243	0.18784	-44.2011	31.6188	-2.65552	0.0669643	0.166454	-50.2198	47.1949	-1.91735	0.0822751	0.163228	-36.9529	34.832	0.767685	0.114952	0.079602	-42.08	30.5359	-0.8039	0.147588	0.164537	-55.4376	34.1586	-0.367579	0.0954636	0.0999501	-35.777	31.5559	-0.605187	0.0957585	0.126464	-47.8552	33.7644	-0.693239	0.0629173	0.0968156	190	76	-42.9996	33.2985	-1.00273
-24.3442	15.5203	-1.23208	0.00845166	0.0682894	-26.4946	28.2941	-1.71905	0.0916515	0.188143	-46.3565	32.6696	-2.50294	0.075574	0.16773	-56.4741	50.1899	-2.00288	0.0902116	0.166402	-38.4079	36.3146	0.870534	0.127258	0.0851008	-47.1343	32.6866	-0.802209	0.153325	0.175489	-61.548	35.7498	-0.414184	0.0987039	0.106929	-36.4511	34.0357	-0.570856	0.103044	0.130367	-49.786	34.2263	-0.650928	0.0690806	0.0960452	191	76.4	-40.6694	32.1874	-0.969369
-23.7382	15.0841	-1.25478	0.00574713	0.0638945	-25.7098	27.2124	-1.77293	0.0852995	0.186025	-45.448	30.3694	-2.43353	0.0644133	0.161033	-54.1567	48.7345	-1.99708	0.0820106	0.160582	-35.1956	34.2622	0.845053	0.118094	0.0806494	-46.4734	33.2111	-0.779926	0.143155	0.16897	-56.1287	35.928	-0.228714	0.0954636	0.0994516	-32.6175	33.8986	-0.542979	0.0965392	0.118137	-46.5569	30.9865	-0.559438	0.0636877	0.0834617	192	76.8	-38.482	31.2765	-0.936791
-23.1321	14.648	-1.28209	0.00439486	0.0628803	-25.2599	26.1306	-1.82694	0.0771325	0.185118	-45.1563	28.2558	-2.34881	0.0554847	0.156569	-51.8394	47.2792	-1.99449	0.0772487	0.156085	-32.267	32.2098	0.800256	0.107358	0.0738413	-45.8125	34.0899	-0.771848	0.135854	0.16193	-50.7094	36.8039	-0.0698332	0.0967099	0.0954636	-28.8338	34.3245	-0.47363	0.0876919	0.10929	-43.3278	27.7467	-0.46374	0.0598356	0.0739599	193	77.2	-36.6445	30.4363	-0.908693
-22.5261	14.2119	-1.30785	0.00642326	0.0625423	-24.9471	25.0488	-1.8676	0.0747126	0.184211	-44.8646	26.5347	-2.28092	0.049426	0.15338	-49.5221	45.8238	-1.99558	0.0730159	0.155556	-29.3507	30.4019	0.756799	0.0932181	0.0680806	-45.1516	34.9686	-0.764192	0.129857	0.160887	-47.7908	37.6798	0.0966837	0.0984546	0.0932203	-25.255	34.7505	-0.446582	0.0837887	0.100442	-40.3924	24.5069	-0.368989	0.0536723	0.0634309	194	77.6	-35.6148	29.8048	-0.88069
-21.92	13.7758	-1.34356	0.00912779	0.0669371	-24.9611	24.0843	-1.92303	0.069268	0.184211	-44.6192	24.8136	-2.20579	0.046875	0.14477	-47.2047	44.3685	-1.98569	0.0708995	0.156614	-26.4344	30.3549	0.718573	0.0858864	0.0638911	-44.4906	35.8474	-0.771123	0.122555	0.159061	-47.2555	38.5557	0.262691	0.0982054	0.0909771	-25.674	35.1764	-0.414079	0.0775436	0.100703	-37.9735	21.2671	-0.264193	0.0446841	0.05547	195	78	-34.8513	30.1044	-0.845858
-21.5412	14.9048	-1.368	0.0118323	0.0757268	-25.5457	27.2269	-1.97008	0.0650333	0.180883	-44.9179	23.0926	-2.13802	0.044324	0.136798	-44.8874	42.9131	-1.97788	0.0719577	0.158201	-23.9161	30.4382	0.697431	0.0853627	0.0594396	-43.8297	37.2044	-0.765016	0.124381	0.16193	-46.7202	39.7811	0.432601	0.0999501	0.0899801	-26.7491	35.6023	-0.35806	0.0723393	0.102264	-35.5547	19.7766	-0.165692	0.0446841	0.0536723	196	78.4	-35.0287	30.8819	-0.815855
-21.209	16.8869	-1.39331	0.0138607	0.0828262	-26.1619	31.898	-2.02807	0.0680581	0.180278	-45.2165	21.7208	-2.05663	0.0430485	0.129145	-42.5701	41.4578	-1.97745	0.0695767	0.161905	-27.0576	30.5866	0.664077	0.0869338	0.0547264	-43.1688	38.9719	-0.760715	0.125163	0.160104	-46.4682	41.136	0.60128	0.103938	0.0882353	-28.2599	36.0282	-0.334245	0.0806661	0.107468	-35.1466	19.2506	-0.0576416	0.0508475	0.0539291	197	78.8	-35.6297	31.8961	-0.784058
-20.8768	18.8691	-1.41956	0.0169033	0.0946586	-26.778	36.6674	-2.07233	0.0710829	0.181488	-45.5152	20.4762	-1.99673	0.0433673	0.125638	-40.6453	40.0024	-1.95302	0.0748677	0.164021	-30.199	30.7351	0.633699	0.0869338	0.0555119	-42.5078	40.7395	-0.763879	0.128814	0.156454	-46.3806	42.4909	0.774754	0.113161	0.086989	-29.9186	36.4541	-0.305454	0.0947177	0.113453	-37.8458	20.6305	0.046009	0.0626605	0.0582948	198	79.2	-37.1775	33.2737	-0.750585
-20.9352	21.0535	-1.45735	0.0196078	0.10311	-27.3941	41.8537	-2.12405	0.0735027	0.185723	-45.8139	19.8438	-1.91522	0.0462372	0.129783	-45.0614	38.547	-1.94251	0.0804233	0.165344	-33.5561	32.8313	0.602928	0.0913852	0.0560356	-41.8469	42.507	-0.757048	0.132464	0.163755	-46.2931	43.8458	0.954531	0.122881	0.0832502	-31.5774	36.88	-0.25848	0.107468	0.124642	-42.1195	22.101	0.141935	0.0675398	0.0618901	199	79.6	-39.3811	35.1101	-0.721538
-21.9918	23.3363	-1.50241	0.0240027	0.11021	-28.0103	47.04	-2.18683	0.0753176	0.186933	-46.1125	23.0251	-1.84511	0.0535714	0.136798	-50.5479	37.0917	-1.95384	0.092328	0.166667	-37.7032	35.1456	0.564463	0.0945274	0.0617963	-43.4927	44.2745	-0.736685	0.140808	0.169492	-46.3149	45.2007	1.13375	0.132104	0.0832502	-33.3929	37.3059	-0.203761	0.123601	0.13453	-46.8633	23.5715	0.236581	0.079096	0.0644581	200	80	-42.2076	37.1514	-0.684003
-23.0483	25.6175	-1.52699	0.0263692	0.115619	-29.6514	52.2233	-2.23776	0.0801573	0.194495	-46.4108	26.7802	-1.76513	0.0647321	0.138074	-56.0302	36.9072	-1.92891	0.104762	0.166667	-41.8469	37.4582	0.541203	0.100026	0.0665096	-48.3122	46.041	-0.72401	0.14811	0.174707	-46.4929	46.5532	1.30354	0.142822	0.0847458	-36.4721	37.7369	-0.164568	0.138434	0.141556	-51.6033	25.0448	0.346597	0.0893683	0.0657422	201	80.4	-39.5503	35.61	-0.709619
-23.5958	24.2115	-1.57489	0.0236646	0.116295	-28.6715	49.9719	-2.24068	0.0798548	0.192075	-45.7008	25.7344	-1.93843	0.0625	0.140625	-50.8705	35.8886	-1.79471	0.0949735	0.157672	-37.7169	36.0049	0.51744	0.0903378	0.0641529	-47.093	45.2081	-0.715932	0.142112	0.16558	-42.8274	41.9689	1.24091	0.133848	0.0772682	-32.9605	36.1283	-0.133086	0.127505	0.135051	-46.5168	25.3729	0.252811	0.0824345	0.067283	202	80.8	-37.155	34.292	-0.732079
-24.39	22.8736	-1.61171	0.0209601	0.116633	-28.7319	47.7205	-2.24792	0.0813672	0.195402	-44.9908	24.6887	-2.11684	0.059949	0.14477	-46.7811	36.1402	-1.63883	0.0862434	0.152381	-33.587	34.5515	0.494013	0.0785546	0.0591778	-45.8738	44.3752	-0.705771	0.135072	0.158018	-39.1618	37.3847	1.19884	0.126869	0.0695414	-29.4489	34.5196	-0.126196	0.117616	0.128025	-41.4303	26.3737	0.165714	0.0780688	0.0667694	203	81.2	-36.1252	33.2929	-0.751991
-25.8544	21.6933	-1.65411	0.0192698	0.118661	-30.0001	45.4691	-2.24734	0.0798548	0.196915	-47.677	23.6429	-2.28889	0.0554847	0.151467	-46.5811	36.3918	-1.46816	0.0814815	0.147354	-29.6079	33.0982	0.471658	0.0717465	0.0555119	-44.6546	43.5423	-0.708543	0.126206	0.151499	-35.4962	33.929	1.16811	0.118644	0.0677966	-28.9121	34.4818	-0.121114	0.111111	0.119438	-36.3438	27.388	0.080471	0.0708783	0.0706215	204	81.6	-35.8227	32.6959	-0.774099
-27.3188	20.6529	-1.69127	0.015551	0.120014	-31.9374	43.2178	-2.25145	0.084997	0.197822	-51.9275	22.9456	-2.43845	0.0577168	0.158482	-46.3812	36.7894	-1.33143	0.0822751	0.143651	-26.2704	31.6448	0.447099	0.0638911	0.0521079	-43.4354	42.7094	-0.696851	0.124902	0.149674	-32.0132	31.3023	1.12269	0.108425	0.0625623	-31.8637	36.5989	-0.118372	0.105126	0.113453	-31.2573	28.4022	-0.00886385	0.0703647	0.0755008	205	82	-36.3516	32.2668	-0.800065
-28.8289	19.6125	-1.73877	0.015213	0.119337	-34.7093	40.9664	-2.26106	0.0916515	0.201149	-56.4673	22.2843	-2.60556	0.0688776	0.16486	-46.8483	37.2715	-1.19984	0.0867725	0.139153	-23.3723	30.6628	0.420607	0.0607489	0.0507986	-42.2161	41.8765	-0.70655	0.119426	0.150456	-29.9086	29.5949	1.08192	0.10319	0.0588235	-35.3886	38.716	-0.0869418	0.103044	0.10929	-29.4249	29.4165	-0.10439	0.0688238	0.0839753	206	82.4	-38.3455	32.5536	-0.81904
-30.4553	18.5722	-1.77784	0.0131846	0.118323	-38.446	39.3822	-2.26313	0.100423	0.209014	-61.0071	22.9972	-2.7594	0.078125	0.169324	-47.5091	37.7535	-1.03713	0.089418	0.139418	-23.774	29.6883	0.395603	0.0591778	0.0515842	-40.997	41.4506	-0.711318	0.115515	0.148892	-31.9313	31.8749	1.02784	0.105184	0.0575773	-38.9134	40.833	-0.0570136	0.100703	0.107208	-32.0763	30.4308	-0.188968	0.068567	0.0911659	207	82.8	-40.947	32.9203	-0.839246
-32.1288	17.5596	-1.8166	0.0125085	0.116633	-42.6299	37.8677	-2.2641	0.107985	0.216878	-65.5469	24.249	-2.9212	0.0825893	0.170599	-48.1698	38.2355	-0.895007	0.0965608	0.137831	-25.1187	28.7137	0.37517	0.0620581	0.0528934	-41.9373	41.1073	-0.698265	0.115254	0.147849	-34.4525	34.155	0.998047	0.105434	0.0608175	-42.4383	42.9501	-0.048862	0.101223	0.104606	-36.1006	31.445	-0.282392	0.0698511	0.095018	208	83.2	-44.0444	33.4008	-0.857811
-33.8022	16.748	-1.85553	0.015213	0.115957	-47.1385	36.3691	-2.27732	0.11464	0.223835	-70.419	25.525	-3.07699	0.0876913	0.174107	-49.4295	39.5004	-0.740388	0.106878	0.137302	-26.4634	27.7392	0.367163	0.0686043	0.0547264	-43.9379	40.7641	-0.709412	0.121252	0.150196	-36.9736	36.435	0.945716	0.107677	0.0630608	-46.4347	45.0672	-0.00748807	0.101743	0.103825	-41.8004	32.4593	-0.36604	0.0770416	0.0988701	209	83.6	-47.4861	35.1426	-0.877368
-35.4757	15.9365	-1.89727	0.015551	0.117309	-51.8177	37.2423	-2.28472	0.123109	0.232305	-75.4148	30.2559	-3.2393	0.096301	0.176339	-52.0609	45.8847	-0.589218	0.118783	0.141005	-27.8081	26.803	0.352242	0.0720084	0.0547264	-46.6487	40.7882	-0.684739	0.129074	0.155932	-39.4948	38.7151	0.896464	0.111665	0.0655533	-50.7786	47.1842	-0.00478825	0.103565	0.104866	-47.8761	33.4736	-0.444981	0.087057	0.100411	210	84	-45.0243	33.7064	-0.840385
-37.1475	15.3598	-1.94672	0.0169033	0.119675	-56.4934	42.3079	-2.29487	0.129159	0.237145	-80.4066	34.9848	-3.40729	0.104911	0.179209	-55.3126	52.5636	-0.455599	0.12963	0.148677	-29.3674	26.7447	0.351716	0.076198	0.0597015	-49.358	41.1053	-0.687661	0.138983	0.163233	-42.0141	40.9924	0.861742	0.118893	0.0725324	-55.1193	49.2992	0.0152235	0.10981	0.106948	0	0	0	0	0	211	84.4	-42.6882	32.0688	-0.827051
-34.9462	14.6602	-1.89615	0.015551	0.116633	-53.0932	41.1309	-2.1407	0.127042	0.226255	-76.5735	35.1641	-3.26587	0.102041	0.17602	-50.3749	49.9653	-0.482839	0.124339	0.141799	-27.6618	25.8898	0.284877	0.0693899	0.0573449	-48.7649	37.6778	-0.77622	0.129335	0.152803	-40.3762	37.1627	0.728083	0.102941	0.0682951	-52.4031	46.9687	0.105354	0.0999219	0.0947177	0	0	0	0	0	212	84.8	-40.4347	30.637	-0.809981
-33.2145	14.4397	-1.85336	0.0158891	0.113928	-49.6929	39.9539	-1.99352	0.124017	0.212341	-72.7404	35.3434	-3.11824	0.0982143	0.171556	-45.496	47.5571	-0.522211	0.118519	0.134392	-26.172	25.0349	0.258073	0.0620581	0.0549882	-48.1718	34.901	-0.837847	0.122034	0.14837	-38.7382	33.7743	0.604053	0.0877368	0.0660518	-49.6868	44.7281	0.173219	0.0965392	0.0850898	0	0	0	0	0	213	85.2	-38.4158	29.8149	-0.79035
-31.4828	14.2997	-1.80835	0.0131846	0.110548	-46.6447	38.7769	-1.84756	0.118572	0.19994	-69.7051	35.5227	-2.96065	0.0975765	0.168686	-40.7431	45.203	-0.550875	0.109259	0.131746	-25.5166	24.1801	0.214019	0.0557738	0.0531553	-47.5786	36.7353	-0.913178	0.113429	0.145502	-37.1003	31.1291	0.470846	0.0765204	0.0653041	-46.9705	42.4875	0.282594	0.093937	0.0819672	0	0	0	0	0	214	85.6	-36.7923	29.0984	-0.770162
-29.7724	14.3079	-1.7456	0.015551	0.105477	-43.8	37.5999	-1.69578	0.119177	0.19147	-66.7864	35.702	-2.81667	0.0969388	0.168048	-36.3941	42.849	-0.577271	0.102116	0.128836	-26.9488	23.7965	0.170732	0.0526316	0.0549882	-47.4171	38.8997	-0.979049	0.104824	0.139505	-35.4623	28.484	0.329455	0.0712861	0.0628116	-44.5497	40.2469	0.382717	0.0936768	0.078064	0	0	0	0	0	215	86	-35.9198	28.7242	-0.748177
-28.815	14.5277	-1.69413	0.0158891	0.101082	-41.3466	36.6418	-1.52615	0.122202	0.187235	-63.9853	35.8813	-2.68101	0.0956633	0.162946	-35.7105	40.495	-0.606125	0.0984127	0.127249	-28.3809	26.0629	0.144941	0.0515842	0.0555119	-48.6122	41.0641	-1.04615	0.0996089	0.139765	-34.1556	25.8388	0.197462	0.0650548	0.0633101	-42.2721	38.0063	0.477565	0.100182	0.074421	0	0	0	0	0	216	86.4	-35.7983	28.36	-0.732328
-28.5617	14.7474	-1.653	0.0182556	0.0993915	-40.0049	35.7735	-1.37591	0.12069	0.183001	-61.3826	36.0605	-2.53569	0.0956633	0.160395	-38.2985	38.1409	-0.641138	0.0931217	0.12672	-29.8131	28.3294	0.0950743	0.0521079	0.0573449	-51.1132	43.2285	-1.12201	0.096219	0.145763	-32.9715	23.1937	0.0659084	0.0628116	0.0663011	-40.0395	35.7657	0.575812	0.104606	0.0723393	0	0	0	0	0	217	86.8	-36.2489	28.1692	-0.720734
-28.8561	15.0271	-1.60539	0.0189317	0.097025	-40.0198	34.9052	-1.20885	0.135209	0.179673	-60.2355	36.2398	-2.42068	0.0953444	0.160077	-40.8866	36.3075	-0.701743	0.0989418	0.129365	-31.7055	30.5958	0.0423207	0.0565593	0.06232	-54.7621	45.3929	-1.19782	0.0946545	0.154889	-31.7873	21.4958	-0.065066	0.060319	0.0705384	-37.9873	33.5583	0.670618	0.116576	0.0739006	0	0	0	0	0	218	87.2	-37.4393	28.882	-0.701685
-29.3978	15.526	-1.55281	0.020622	0.0926302	-40.2887	34.0369	-1.07295	0.14882	0.181791	-65.0527	36.4191	-2.28483	0.0975765	0.162309	-43.4747	36.4194	-0.712692	0.102116	0.136243	-33.7909	33.3247	0.00952094	0.06232	0.0693899	-58.411	47.5572	-1.24605	0.0954368	0.158018	-30.6031	24.4218	-0.198478	0.0600698	0.0760219	-35.9352	32.233	0.743127	0.127244	0.0801457	0	0	0	0	0	219	87.6	-38.9499	29.8455	-0.683121
-30.2334	16.0249	-1.49847	0.0229885	0.0912779	-41.3786	33.1686	-0.909983	0.162432	0.179976	-69.8699	37.4044	-2.12759	0.104273	0.160395	-46.0628	36.8089	-0.758916	0.106085	0.136508	-35.8764	36.0605	-0.0391609	0.0670333	0.0767217	-62.7104	49.7216	-1.33612	0.0975228	0.16219	-30.5349	27.4227	-0.319402	0.0595713	0.082004	-33.8831	31.9978	0.841549	0.132188	0.0892532	0	0	0	0	0	220	88	-41.0087	31.2554	-0.66183
-31.289	16.6517	-1.4384	0.025693	0.091616	-43.7945	32.4869	-0.748829	0.173624	0.181186	-74.6823	39.6989	-1.96184	0.110332	0.158482	-48.6474	37.1978	-0.795417	0.111111	0.142593	-38.1509	38.7956	-0.0684122	0.0759361	0.083006	-67.3512	51.8825	-1.41609	0.105085	0.167666	-33.3318	30.5161	-0.452699	0.0620638	0.0912263	-31.8307	34.0688	0.925218	0.140255	0.0967994	0	0	0	0	0	221	88.4	-38.9819	30.4482	-0.649841
-29.8797	17.2953	-1.35638	0.0226504	0.081474	-44.222	31.0514	-0.768026	0.169389	0.178161	-69.5803	38.8291	-1.79827	0.107462	0.151786	-43.8648	36.2233	-0.844195	0.101852	0.146032	-36.9519	39.8236	-0.180309	0.0683425	0.0832679	-66.5064	46.7584	-1.36929	0.095176	0.159583	-29.8785	29.692	-0.457506	0.0510967	0.0852443	-29.9536	34.3604	0.92541	0.13453	0.0915951	0	0	0	0	0	222	88.8	-37.267	29.8719	-0.641974
-28.4703	17.9391	-1.25381	0.0219743	0.0750507	-46.6307	31.6946	-0.778227	0.166062	0.176951	-64.4783	37.9592	-1.62817	0.104911	0.148916	-39.4182	35.2487	-0.899497	0.0944444	0.149206	-35.9434	40.8515	-0.316357	0.0617963	0.0856245	-65.6616	41.6343	-1.3568	0.0897001	0.153846	-26.6733	28.8678	-0.440972	0.0486042	0.0782652	-28.1272	34.652	0.896061	0.128545	0.090294	0	0	0	0	0	223	89.2	-35.7237	29.6323	-0.624709
-27.0609	18.5828	-1.15818	0.0209601	0.07167	-49.5427	35.156	-0.795304	0.163037	0.175439	-59.3762	37.1151	-1.43069	0.106186	0.143814	-35.6887	34.2742	-0.925322	0.0873016	0.153968	-34.9349	41.8794	-0.438377	0.0581304	0.0898141	-64.8167	36.6955	-1.32199	0.0894394	0.149153	-23.7099	28.0436	-0.43962	0.0500997	0.0745264	-26.3834	34.9436	0.887105	0.127765	0.090294	0	0	0	0	0	224	89.6	-34.7851	30.1211	-0.612508
-25.6516	19.2264	-1.06282	0.0219743	0.0693036	-52.5126	38.6174	-0.813434	0.161525	0.172414	-54.2742	36.663	-1.26265	0.103316	0.138393	-33.7273	33.2996	-0.981129	0.0873016	0.159788	-33.9264	42.9074	-0.579333	0.0528934	0.0919089	-64.2502	37.8858	-1.26276	0.0985658	0.148892	-22.7852	27.2552	-0.424493	0.0538385	0.0737787	-25.9387	35.2352	0.874054	0.125683	0.0879521	0	0	0	0	0	225	90	-34.7652	30.6138	-0.599573
-24.4124	19.8701	-0.96936	0.0236646	0.0655849	-55.4826	42.0788	-0.814812	0.161222	0.171506	-51.9262	36.2109	-1.0849	0.103635	0.135842	-32.693	32.3251	-1.02169	0.0886243	0.164815	-34.245	43.9353	-0.700294	0.0510605	0.0960985	-63.8861	39.076	-1.23325	0.114211	0.15176	-23.137	26.5009	-0.42433	0.0578265	0.0677966	-27.1045	35.5268	0.852473	0.125683	0.0861306	0	0	0	0	0	226	90.4	-35.351	31.2107	-0.585944
-23.6996	20.5138	-0.870599	0.0267072	0.0682894	-58.4526	45.5402	-0.840129	0.162432	0.167574	-51.693	35.7587	-0.887556	0.104273	0.132972	-32.0545	31.3505	-1.06729	0.0939153	0.167725	-35.2886	44.9633	-0.818369	0.0552501	0.104478	-63.5219	41.1175	-1.19157	0.126988	0.158801	-25.1781	25.7467	-0.42486	0.0625623	0.0677966	-28.2703	35.9053	0.826874	0.12256	0.0892532	0	0	0	0	0	227	90.8	-37.1429	32.1619	-0.572525
-26.478	21.1575	-0.777178	0.0297498	0.0689655	-61.4226	49.0016	-0.839846	0.162734	0.169389	-51.4599	35.6162	-0.707398	0.106505	0.131378	-35.2204	31.077	-1.10323	0.0970899	0.167989	-36.3321	46.0108	-0.942857	0.0599633	0.113119	-63.1578	43.2586	-1.16953	0.134811	0.166623	-30.484	26.9847	-0.416096	0.0695414	0.0740279	-29.7317	36.3507	0.803421	0.128285	0.0905543	0	0	0	0	0	228	91.2	-39.1089	33.6727	-0.560524
-29.4693	21.8012	-0.678826	0.0348208	0.0689655	-64.3926	52.463	-0.854904	0.162432	0.171809	-51.2269	36.1465	-0.534874	0.108418	0.129464	-39.1155	32.0094	-1.14848	0.10291	0.169312	-37.3757	47.3414	-1.06928	0.0625818	0.118094	-62.7936	46.1808	-1.13635	0.143677	0.172621	-35.79	30.3158	-0.41131	0.0770189	0.0785145	-31.8167	36.7962	0.789308	0.132449	0.0928962	0	0	0	0	0	229	91.6	-41.151	35.9394	-0.551807
-32.5232	22.4449	-0.589889	0.0439486	0.0747126	-67.3626	55.9244	-0.865131	0.164247	0.174834	-50.9938	39.9123	-0.358468	0.113202	0.125	-43.0105	32.9605	-1.19204	0.110582	0.173545	-38.4192	48.672	-1.20146	0.0683425	0.124902	-62.4295	52.3723	-1.11446	0.149413	0.178879	-41.3874	33.9265	-0.404715	0.0862413	0.0854935	-34.2326	37.2417	0.759907	0.137393	0.0947177	0	0	0	0	0	230	92	-27.8613	22.0065	-0.353623
-35.5742	23.0886	-0.50002	0.0557809	0.0770791	-70.3303	59.382	-0.876287	0.168784	0.181186	-50.7578	43.6748	-0.160314	0.119898	0.117347	-46.9005	33.9926	-1.24035	0.117989	0.174074	0	0	0	0	0	0	0	0	0	0	-47.1892	37.921	-0.405637	0.0954636	0.0944666	0	0	0	0	0	0	0	0	0	0	231	92.4	-25.7054	21.0488	-0.307192
-33.2197	23.6113	-0.41932	0.0554429	0.0736984	-68.898	55.5018	-0.858205	0.16092	0.170296	-44.8905	41.2683	0.0184595	0.116071	0.105548	-41.0423	34.9707	-1.13525	0.107937	0.164021	0	0	0	0	0	0	0	0	0	0	-43.2982	34.0866	-0.37042	0.0874875	0.0852443	0	0	0	0	0	0	0	0	0	0	232	92.8	-23.7461	20.1291	-0.25676
-30.8652	24.134	-0.346802	0.0530764	0.0709939	-67.4656	51.8466	-0.832742	0.154265	0.163037	-39.4806	38.8619	0.216853	0.117347	0.09375	-36.4962	36.0673	-1.02283	0.1	0.15291	0	0	0	0	0	0	0	0	0	0	-39.4071	30.2523	-0.325315	0.0755234	0.078016	0	0	0	0	0	0	0	0	0	0	233	93.2	-22.3836	19.2135	-0.209284
-28.5107	24.6846	-0.267158	0.0507099	0.07167	-66.0332	48.1996	-0.833392	0.147308	0.158197	-34.2386	36.4555	0.419635	0.116709	0.0845026	-37.1542	37.1638	-0.915325	0.0955026	0.146296	0	0	0	0	0	0	0	0	0	0	-35.5161	26.418	-0.287313	0.0653041	0.0732802	0	0	0	0	0	0	0	0	0	0	234	93.6	-21.988	18.5726	-0.161487
-26.1562	25.2768	-0.190059	0.051048	0.0672752	-64.6009	44.5527	-0.812396	0.141561	0.154567	-36.6243	34.2424	0.604112	0.115434	0.0797194	-38.8854	38.2604	-0.816041	0.0880952	0.142328	0	0	0	0	0	0	0	0	0	0	-31.625	24.8209	-0.239003	0.0575773	0.0667996	0	0	0	0	0	0	0	0	0	0	235	94	-21.6794	18.6288	-0.11373
-23.8017	25.8689	-0.105548	0.0520622	0.0601758	-63.1685	40.9057	-0.780608	0.137629	0.152753	-39.7665	35.2458	0.771428	0.115434	0.0720663	-40.6438	39.3569	-0.707353	0.0867725	0.133333	0	0	0	0	0	0	0	0	0	0	-27.734	26.2821	-0.201486	0.050349	0.0605683	0	0	0	0	0	0	0	0	0	0	236	94.4	-21.3837	18.9125	-0.0648137
-21.4472	26.461	-0.0360866	0.0537525	0.0574713	-61.7361	37.2587	-0.76151	0.129764	0.145796	-43.0252	38.2957	0.970289	0.118622	0.0644133	-42.4022	40.4534	-0.597053	0.0949735	0.128042	0	0	0	0	0	0	0	0	0	0	-23.8429	27.7433	-0.158963	0.0453639	0.0508475	0	0	0	0	0	0	0	0	0	0	237	94.8	-21.838	19.2088	-0.0181616
-20.9309	27.0531	0.0415665	0.0588235	0.0544287	-60.3038	33.6118	-0.755474	0.131276	0.142771	-46.2839	41.4594	1.1598	0.129145	0.0669643	-44.1606	41.55	-0.491655	0.107937	0.120899	0	0	0	0	0	0	0	0	0	0	-24.8627	29.2046	-0.117688	0.0423729	0.0498504	0	0	0	0	0	0	0	0	0	0	238	95.2	-22.6402	19.6126	0.027524
-22.0413	27.6453	0.106234	0.0608519	0.0540906	-58.8714	29.9648	-0.77079	0.138536	0.143073	-49.5426	45.182	1.36821	0.139987	0.067602	-45.919	43.0209	-0.383079	0.116931	0.121693	0	0	0	0	0	0	0	0	0	0	-27.3879	30.7001	-0.0728602	0.0433699	0.0481057	0	0	0	0	0	0	0	0	0	0	239	95.6	-23.5527	20.4256	0.0734981
-23.3123	28.2374	0.190809	0.0679513	0.0540906	-57.439	27.7782	-0.761255	0.149728	0.144586	-52.8012	48.9047	1.5178	0.154974	0.0762117	-48.4006	46.1275	-0.259055	0.129365	0.125132	0	0	0	0	0	0	0	0	0	0	-30.0211	32.7823	-0.0268151	0.0471087	0.0456132	0	0	0	0	0	0	0	0	0	0	240	96	-20.8482	18.1462	0.119924
-24.6379	29.4777	0.278858	0.0726842	0.0520622	-56.0059	30.6639	-0.731703	0.163037	0.149425	-56.0532	52.6236	1.70892	0.173788	0.0854592	-50.9368	50.5502	-0.176759	0.14127	0.134656	0	0	0	0	0	0	0	0	0	0	0	0	0	0	0	0	0	0	0	0	0	0	0	0	0	241	96.4	-19.5536	17.0957	0.0946715
-23.8246	29.0055	0.327634	0.0645707	0.0415822	-53.127	29.8251	-0.816361	0.153358	0.148518	-48.0089	49.519	1.57738	0.165497	0.0876913	-51.0216	45.5121	-0.236611	0.129365	0.128042	0	0	0	0	0	0	0	0	0	0	0	0	0	0	0	0	0	0	0	0	0	0	0	0	0	242	96.8	-18.9579	16.079	0.0683438
-23.5554	28.5334	0.378315	0.0605139	0.0341447	-50.248	29.0065	-0.881333	0.145493	0.14882	-45.6233	46.6974	1.44973	0.15625	0.0902423	-51.1947	40.474	-0.33162	0.125926	0.125661	0	0	0	0	0	0	0	0	0	0	0	0	0	0	0	0	0	0	0	0	0	0	0	0	0	243	97.2	-18.3904	15.1328	0.0430915
-23.5389	28.0613	0.43016	0.0601758	0.0314402	-47.3691	28.4322	-0.942244	0.138234	0.150333	-43.2376	44.2662	1.30398	0.150829	0.0899235	-51.3678	35.436	-0.404067	0.122222	0.125132	0	0	0	0	0	0	0	0	0	0	0	0	0	0	0	0	0	0	0	0	0	0	0	0	0	244	97.6	-17.9535	14.6861	0.0206368
-23.8142	27.8038	0.492432	0.0567951	0.0294118	-44.4902	28.0154	-0.995311	0.130974	0.151845	-41.736	41.835	1.15643	0.141582	0.0892857	-51.5409	34.5207	-0.467821	0.120106	0.126984	0	0	0	0	0	0	0	0	0	0	0	0	0	0	0	0	0	0	0	0	0	0	0	0	0	245	98	-17.5577	14.5501	-0.00963965
-24.0895	27.6574	0.545099	0.0615281	0.0280595	-41.8348	27.649	-1.06036	0.131276	0.162129	-40.3806	39.4038	0.998858	0.136798	0.0915179	-51.714	36.2405	-0.570358	0.114021	0.133862	0	0	0	0	0	0	0	0	0	0	0	0	0	0	0	0	0	0	0	0	0	0	0	0	0	246	98.4	-17.5277	14.4634	-0.0394771
-24.4777	27.5416	0.601874	0.0652468	0.0267072	-41.5397	27.5205	-1.14794	0.130974	0.170599	-39.8449	37.1368	0.839465	0.13361	0.0902423	-51.8872	37.9718	-0.648691	0.11455	0.137566	0	0	0	0	0	0	0	0	0	0	0	0	0	0	0	0	0	0	0	0	0	0	0	0	0	247	98.8	-18.0492	14.5356	-0.0641334
-25.0977	27.618	0.660247	0.0706558	0.0280595	-43.4823	28.1598	-1.20178	0.133696	0.173019	-41.8027	35.3392	0.688219	0.130102	0.0940689	-52.0603	39.7031	-0.723887	0.116667	0.143122	0	0	0	0	0	0	0	0	0	0	0	0	0	0	0	0	0	0	0	0	0	0	0	0	0	248	99.2	-18.9211	15.075	-0.0927962
-25.7176	29.6239	0.709463	0.0760649	0.0324544	-45.523	30.8508	-1.2919	0.137024	0.175741	-46.816	33.766	0.540279	0.13074	0.0991709	-52.2334	41.4344	-0.793009	0.113228	0.146561	0	0	0	0	0	0	0	0	0	0	0	0	0	0	0	0	0	0	0	0	0	0	0	0	0	249	99.6	-19.817	16.1587	-0.119427
-26.3375	32.727	0.766619	0.081812	0.0361731	-47.5638	33.5418	-1.34093	0.140956	0.183606	-52.0455	35.9936	0.371542	0.136798	0.101722	-52.4065	43.1656	-0.872073	0.112963	0.151058	0	0	0	0	0	0	0	0	0	0	0	0	0	0	0	0	0	0	0	0	0	0	0	0	0
[truncated: 7 more columns]

## Sheet: 1
P1					P2					P3					P4					P5					P6					P7					P8					P9							min	max	avg
min	max	avg	ccw [%]	cw [%]	min	max	avg	ccw [%]	cw [%]	min	max	avg	ccw [%]	cw [%]	min	max	avg	ccw [%]	cw [%]	min	max	avg	ccw [%]	cw [%]	min	max	avg	ccw [%]	cw [%]	min	max	avg	ccw [%]	cw [%]	min	max	avg	ccw [%]	cw [%]	min	max	avg	ccw [%]	cw [%]	0	0	-43.3036	37.6301	-0.421616
-35.1143	15.9068	-1.50129	0.0136742	0.0796671	-33.623	27.2749	-0.269715	0.124288	0.118234	-54.2213	55.1688	-0.0451515	0.101341	0.0971684	-53.7295	44.7024	-0.439477	0.0661442	0.0758621	-34.9382	34.3009	-0.302692	0.0561828	0.0916667	-55.2782	41.648	-0.773633	0.199574	0.20715	-36.0263	63.5435	0.994171	0.0937689	0.069268	-39.1669	13.7304	-1.13735	0.00860969	0.0609056	-47.6347	42.3949	-0.319403	0.0706215	0.090113	1	0.4	-40.4094	35.3726	-0.432855
-32.893	14.7201	-1.50462	0.0118906	0.0763971	-32.3198	25.5712	-0.388293	0.111467	0.118946	-50.5299	55.0386	-0.166128	0.0926975	0.0956781	-49.8836	40.2743	-0.413211	0.0630094	0.0636364	-33.5456	33.9396	-0.129394	0.0599462	0.083871	-52.6999	40.1451	-0.917454	0.182765	0.198627	-30.9928	55.1897	1.03299	0.0928615	0.0562613	-37.9253	15.4994	-0.993881	0.00924745	0.0596301	-42.8945	37.9755	-0.415705	0.0672316	0.0864407	2	0.8	-38.3157	34.2096	-0.437932
-30.7663	14.1744	-1.49213	0.00951249	0.0749108	-31.3273	25.2865	-0.499104	0.09651	0.119658	-47.7585	54.9737	-0.262847	0.0879285	0.0959762	-46.0377	35.8462	-0.38335	0.060815	0.0605016	-32.1924	33.5783	0.0519385	0.0709677	0.0782258	-50.1215	38.6422	-1.05952	0.164536	0.194129	-28.102	51.734	1.07325	0.0943739	0.053539	-37.0487	17.3355	-0.849653	0.015625	0.0551658	-41.4864	36.3154	-0.519977	0.0618644	0.0813559	3	1.2	-37.5241	34.4959	-0.445719
-29.0337	13.7953	-1.48684	0.00951249	0.07283	-31.6393	26.8807	-0.609768	0.0975783	0.121083	-46.4007	54.9089	-0.377624	0.0894188	0.099851	-42.1918	31.4181	-0.351126	0.062069	0.0655172	-31.0304	33.2169	0.21678	0.0817204	0.0755376	-47.634	39.4826	-1.17373	0.149621	0.188684	-25.4443	53.4108	1.11642	0.0955838	0.0562613	-37.7573	22.6303	-0.729277	0.0344388	0.0634566	-46.5856	34.7193	-0.616307	0.0533898	0.0836158	4	1.6	-37.801	35.1461	-0.457132
-27.8246	14.1911	-1.47792	0.0115933	0.0716409	-32.1504	28.894	-0.725508	0.0982906	0.122863	-45.9107	54.8441	-0.478948	0.0846498	0.0977645	-38.346	26.99	-0.330143	0.0677116	0.0695925	-29.8684	32.8556	0.372369	0.0956989	0.0784946	-45.2906	41.5802	-1.33006	0.129261	0.1875	-27.4331	55.0876	1.15925	0.0961887	0.0683606	-41.7008	28.7487	-0.591036	0.0558036	0.0711097	-51.6847	33.1231	-0.7122	0.0454802	0.0853107	5	2	-39.7158	36.1731	-0.463823
-27.3555	16.7532	-1.47102	0.0124851	0.0746136	-33.1456	31.4184	-0.822738	0.10933	0.143519	-45.663	54.7793	-0.585542	0.0825633	0.10462	-34.5001	22.5619	-0.300491	0.069279	0.0742947	-31.1478	32.4943	0.526271	0.107527	0.0811828	-44.8054	44.3928	-1.47078	0.118845	0.187737	-36.9093	56.7643	1.22112	0.106776	0.0704779	-47.132	34.8672	-0.464359	0.0771684	0.0816327	-56.7838	31.527	-0.80687	0.0463277	0.0838983	6	2.4	-43.1872	38.259	-0.476055
-27.3543	20.0963	-1.46152	0.014566	0.0814507	-34.6775	34.0791	-0.939742	0.116097	0.158476	-46.139	54.7144	-0.694922	0.0852459	0.113264	-30.7412	26.1913	-0.272095	0.0714734	0.0793103	-40.1482	32.133	0.708993	0.121774	0.086828	-48.7924	47.2054	-1.65039	0.109612	0.184186	-46.3856	58.4411	1.25199	0.115245	0.077435	-52.5632	40.9857	-0.321985	0.0959821	0.0896046	-61.8829	30.4849	-0.90483	0.0437853	0.080226	7	2.8	-46.9939	41.0649	-0.48309
-27.7421	23.6189	-1.45668	0.0151605	0.0882878	-36.2095	36.7398	-1.02839	0.122863	0.171652	-46.7052	54.6496	-0.798117	0.0885246	0.123696	-27.1726	30.1179	-0.245707	0.0721003	0.0805643	-49.5714	33.8379	0.866249	0.131452	0.0897849	-53.9609	50.018	-1.78005	0.10393	0.180398	-55.8619	60.1179	1.29065	0.122202	0.0889292	-58.5962	47.1041	-0.189549	0.111607	0.103316	-67.1255	33.3799	-1.00622	0.0389831	0.0742938	8	3.2	-51.3266	44.682	-0.492925
-28.1299	27.1415	-1.45119	0.0157551	0.0888823	-37.897	39.4006	-1.13697	0.133191	0.178775	-47.8436	54.5848	-0.888227	0.090313	0.132042	-27.0274	34.0444	-0.222744	0.0758621	0.0896552	-58.9945	37.6657	1.02747	0.143011	0.0951613	-59.1293	52.8306	-1.93981	0.0991951	0.165246	-65.3381	61.7947	1.33901	0.130067	0.091954	-64.8412	53.2226	-0.0478858	0.125319	0.111607	-72.7381	41.4527	-1.11599	0.0378531	0.0714689	9	3.6	-55.9843	48.4004	-0.499519
-28.5363	30.6641	-1.44197	0.0184304	0.0933413	-39.5969	42.0613	-1.23633	0.142094	0.190527	-48.982	54.52	-0.975626	0.0929955	0.143666	-29.6295	37.971	-0.183668	0.0836991	0.0956113	-68.4177	41.8382	1.20865	0.152957	0.101075	-64.4453	56.2106	-2.08936	0.103456	0.169744	-74.8144	63.4715	1.35426	0.139746	0.099516	-71.0862	59.3411	0.0856825	0.135204	0.123724	-78.3507	49.5255	-1.21731	0.0392655	0.0731638	10	4	-60.922	52.6131	-0.507196
-29.2524	34.1867	-1.43278	0.0237812	0.0954221	-42.7627	44.722	-1.33491	0.149929	0.196581	-50.6228	56.1222	-1.07094	0.0959762	0.153204	-32.2316	41.8975	-0.166512	0.0909091	0.102194	-77.8408	46.0107	1.38311	0.161559	0.106452	-70.0025	59.8096	-2.25186	0.108191	0.180398	-84.2906	67.7112	1.40223	0.150938	0.104658	-77.3311	65.4595	0.227138	0.143495	0.13648	-83.9633	57.5983	-1.32023	0.0426554	0.079096	11	4.4	-59.1308	51.1809	-0.785055
-28.1323	33.2569	-1.51678	0.0219976	0.0972057	-51.6913	38.6786	-2.18046	0.130342	0.206197	-47.821	48.8791	-1.35122	0.0825633	0.149627	-31.0089	37.4672	-0.342678	0.0808777	0.0974922	-82.2709	43.7254	1.15577	0.155376	0.102419	-65.7924	58.228	-2.65223	0.0918561	0.191525	-75.898	69.2231	1.06538	0.151543	0.107381	-69.9006	64.8705	-0.0920887	0.140306	0.144133	-79.662	66.2989	-1.15119	0.0474576	0.0731638	12	4.8	-58.599	50.7483	-1.06474
-28.8254	32.327	-1.59302	0.0181332	0.097503	-61.6865	33.071	-3.00164	0.109687	0.212607	-48.0111	41.636	-1.6428	0.0754098	0.149925	-29.7862	35.1655	-0.554942	0.069906	0.0981191	-86.7009	45.3104	0.935586	0.146505	0.101613	-61.5823	56.6464	-3.05254	0.0963542	0.213542	-72.5241	73.298	0.739226	0.156685	0.121597	-62.4701	64.2815	-0.417087	0.138074	0.154974	-75.8048	74.9995	-0.995431	0.0632768	0.0841808	13	5.2	-60.7617	51.5873	-1.34665
-29.5184	31.3972	-1.67859	0.0157551	0.0969084	-72.7693	29.3057	-3.83812	0.0961538	0.214387	-55.2507	40.0009	-1.94377	0.0670641	0.147839	-28.5634	36.1458	-0.748624	0.0664577	0.105016	-91.131	47.4931	0.707052	0.136559	0.0994624	-57.3721	55.0647	-3.42503	0.107008	0.233665	-82.5303	77.3728	0.375342	0.164852	0.142771	-55.3948	63.8053	-0.733897	0.137755	0.164541	-74.3253	83.7001	-0.834247	0.0686441	0.0988701	14	5.6	-64.7577	53.2281	-1.6285
-30.2114	30.4674	-1.75662	0.0157551	0.0966112	-83.985	28.0462	-4.69118	0.0808405	0.215456	-66.0863	42.183	-2.23663	0.0590164	0.149329	-27.39	37.1261	-0.935211	0.0664577	0.113793	-95.5611	49.6757	0.483081	0.130108	0.0935484	-65.1057	53.4831	-3.81823	0.107244	0.246686	-92.5366	81.4477	0.032214	0.169389	0.159407	-49.0971	64.2226	-1.04334	0.138393	0.180804	-72.8458	92.4007	-0.690554	0.0771186	0.111017	15	6	-70.1512	55.14	-1.90906
-30.9044	29.5376	-1.83419	0.0151605	0.098692	-95.2651	28.7467	-5.50943	0.0698006	0.216168	-80.9267	44.365	-2.50873	0.0500745	0.152906	-27.7985	38.3233	-1.13325	0.0667712	0.126332	-99.9912	51.9503	0.255052	0.122043	0.0932796	-75.5587	52.0736	-4.23248	0.108428	0.264205	-102.543	85.5225	-0.330413	0.169389	0.176951	-45.5981	64.6398	-1.34594	0.133929	0.189732	-72.7755	101.101	-0.542199	0.0872881	0.117797	16	6.4	-77.9492	57.9795	-2.18598
-31.5975	28.6078	-1.91063	0.0136742	0.103151	-106.545	29.4472	-6.34957	0.0633903	0.222578	-98.0637	46.547	-2.7646	0.04769	0.154694	-31.5586	39.5619	-1.31373	0.0727273	0.139185	-105.364	54.6368	0.0399465	0.114785	0.091129	-87.3934	58.5588	-4.62278	0.109612	0.277225	-112.549	89.5974	-0.684726	0.170296	0.185723	-52.5199	65.0571	-1.67469	0.129464	0.200574	-75.9518	109.802	-0.393068	0.090678	0.120904	17	6.8	-86.3372	61.2349	-2.46308
-32.2905	27.678	-1.99397	0.0130797	0.104637	-117.825	30.1476	-7.18388	0.0562678	0.22614	-115.527	48.7998	-3.03701	0.0459016	0.157079	-35.6881	40.8006	-1.51476	0.0774295	0.152978	-110.818	57.3232	-0.182268	0.109677	0.0927419	-99.2281	68.7158	-5.0317	0.111032	0.281013	-122.555	93.6722	-1.01431	0.173624	0.19389	-59.7633	65.4744	-1.99211	0.12787	0.204401	-83.3393	118.502	-0.217737	0.0954802	0.134181	18	7.2	-95.0272	64.643	-2.74256
-32.9835	26.8289	-2.07588	0.0121879	0.106421	-129.105	30.8481	-8.01773	0.0530627	0.233974	-132.991	51.27	-3.29693	0.0533532	0.162146	-40.0429	42.0393	-1.70258	0.084326	0.164263	-116.271	60.0097	-0.418662	0.109409	0.103763	-111.763	78.8727	-5.42998	0.112216	0.290246	-132.562	98.0594	-1.35565	0.179068	0.19873	-67.0199	66.6556	-2.32271	0.128827	0.210459	-92.506	127.203	-0.0629405	0.100565	0.14209	19	7.6	-103.948	68.7504	-3.02352
-33.6765	26.0635	-2.15623	0.0121879	0.10761	-140.47	31.5485	-8.86092	0.0495014	0.244302	-150.455	53.7401	-3.59157	0.0593145	0.167809	-44.4933	43.2779	-1.90718	0.0887147	0.1721	-121.899	63.2133	-0.630756	0.108333	0.110753	-124.626	89.0297	-5.81213	0.115294	0.299479	-142.568	107.941	-1.70668	0.181791	0.202057	-74.2765	68.0356	-2.6186	0.13074	0.219707	-103.068	135.904	0.0723793	0.110734	0.15	20	8	-113.101	72.9072	-3.30308
-34.4958	25.298	-2.23268	0.0115933	0.113258	-151.877	32.249	-9.70008	0.0502137	0.256766	-168.807	56.3656	-3.89598	0.0706408	0.174963	-48.9437	44.5166	-2.08663	0.0940439	0.17931	-128.559	66.7065	-0.862582	0.112634	0.118011	-137.488	99.1867	-6.22919	0.119792	0.305161	-152.574	117.823	-2.02653	0.180581	0.208106	-81.5331	69.4155	-2.9224	0.138074	0.229273	-113.631	144.604	0.228341	0.129944	0.15565	21	8.4	-115.077	74.5437	-3.51245
-33.6287	22.7501	-2.28578	0.00891795	0.109691	-154.19	32.1386	-10.1034	0.0391738	0.257479	-167.836	53.5982	-4.04194	0.0670641	0.184501	-53.9779	42.6822	-2.26827	0.0968652	0.185266	-134.595	67.942	-0.8742	0.111559	0.113978	-136.914	108.392	-6.71131	0.110085	0.304924	-155.327	125.083	-2.97447	0.177556	0.243799	-86.4173	70.2251	-2.61644	0.142219	0.22449	-112.809	148.082	0.263752	0.133616	0.172881	22	8.8	-117.481	76.2852	-3.71465
-32.7616	20.2022	-2.33453	0.00743163	0.111177	-156.503	32.0282	-10.5065	0.0359687	0.26567	-166.865	50.8308	-4.17339	0.0652757	0.190164	-60.1078	40.8478	-2.45252	0.1	0.187147	-140.63	69.1775	-0.889737	0.108602	0.109946	-139.096	117.596	-7.18624	0.109375	0.316288	-158.08	132.588	-3.89747	0.182698	0.263763	-91.3015	71.083	-2.26127	0.152105	0.219707	-111.987	152.213	0.269792	0.140678	0.188701	23	9.2	-120.42	78.3967	-3.9312
-31.8944	17.6543	-2.38323	0.00624257	0.111474	-158.883	31.9178	-10.9326	0.0377493	0.275641	-165.894	48.0634	-4.30852	0.0634873	0.195529	-69.0486	42.1045	-2.66598	0.102821	0.188401	-146.666	70.4131	-0.891216	0.108871	0.105376	-142.984	126.801	-7.66266	0.111269	0.317945	-160.833	140.092	-4.84127	0.186328	0.271627	-96.4142	72.1788	-1.9802	0.160077	0.217156	-111.165	156.345	0.284845	0.149153	0.19209	24	9.6	-123.852	80.9489	-4.1394
-31.0273	15.1064	-2.43862	0.00356718	0.111474	-161.288	31.8074	-11.334	0.0402422	0.282764	-166.302	45.2961	-4.42871	0.0628912	0.194337	-77.9894	47.328	-2.8654	0.105643	0.194044	-153.113	71.6485	-0.914291	0.111559	0.1	-148.087	136.006	-8.13544	0.117188	0.326231	-163.586	147.597	-5.78103	0.183908	0.281609	-102.08	73.2746	-1.64627	0.170281	0.214923	-111.195	160.476	0.289239	0.156497	0.191808	25	10	-128.125	83.5585	-4.34636
-30.1601	12.5585	-2.48798	0.00237812	0.111177	-163.694	32.096	-11.7374	0.045584	0.285969	-168.648	42.596	-4.56724	0.061997	0.19076	-89.1326	52.6016	-3.04667	0.11442	0.198433	-159.887	72.8841	-0.915004	0.116398	0.102419	-154.442	145.211	-8.62467	0.119792	0.332386	-166.339	155.102	-6.70374	0.185723	0.282214	-107.745	74.3703	-1.32974	0.184949	0.213967	-113.081	164.608	0.295246	0.164689	0.191808	26	10.4	-135.148	86.3247	-4.55737
-29.293	10.0106	-2.53727	0.000297265	0.111474	-166.145	32.4326	-12.1566	0.0498575	0.287037	-173.197	40.0602	-4.71202	0.0628912	0.187779	-101.898	57.8752	-3.24963	0.122884	0.20815	-166.66	74.1196	-0.934445	0.120968	0.103763	-161.63	154.416	-9.10126	0.126184	0.337358	-182.798	162.606	-7.62146	0.183303	0.290381	-113.41	76.6634	-1.02323	0.19611	0.211097	-121.3	168.739	0.319531	0.173729	0.191525	27	10.8	-145.28	89.2421	-4.77441
-29.8522	7.47158	-2.59154	0	0.113258	-168.605	32.7693	-12.5749	0.0551994	0.297009	-180.706	37.5244	-4.85085	0.0634873	0.185991	-116.123	63.1489	-3.45339	0.12884	0.211912	-173.434	75.3551	-0.936322	0.126882	0.110753	-168.819	164.56	-9.59554	0.130919	0.34517	-208.996	170.111	-8.56747	0.18542	0.294011	-119.076	79.1116	-0.723665	0.205038	0.209184	-141.912	173.127	0.324041	0.185028	0.191243	28	11.2	-156.016	92.8506	-4.98613
-32.3889	5.13563	-2.64269	0	0.116825	-171.065	33.3059	-12.9855	0.0587607	0.303419	-190.93	39.9222	-4.99824	0.0661699	0.18003	-131.086	68.4225	-3.63283	0.133542	0.215047	-180.208	76.5906	-0.960668	0.131989	0.11828	-176.007	175.502	-10.0805	0.142756	0.347538	-235.194	177.615	-9.49185	0.189655	0.297036	-124.741	81.5598	-0.399175	0.21588	0.208546	-162.525	177.601	0.316279	0.192655	0.190395	29	11.6	-166.941	96.9895	-5.19701
-35.0438	5.03224	-2.69264	0	0.120987	-173.525	34.7232	-13.3881	0.0616097	0.313746	-202.002	43.0418	-5.12361	0.0706408	0.179732	-146.049	73.6961	-3.83602	0.137304	0.219122	-186.981	77.9672	-0.980642	0.138172	0.125269	-183.196	186.444	-10.5526	0.154593	0.350616	-262.131	185.12	-10.4487	0.194192	0.299456	-130.407	84.8053	-0.0811863	0.227041	0.209821	-183.137	182.075	0.330534	0.199153	0.187571	30	12	-178.98	101.733	-5.40161
-37.769	6.67395	-2.74416	0	0.12069	-175.986	37.1066	-13.7987	0.0683761	0.321937	-214.816	47.6518	-5.23372	0.0792846	0.180328	-161.191	78.9698	-4.03438	0.142006	0.217555	-193.755	79.6552	-0.989139	0.145968	0.130376	-196.704	197.386	-11.0124	0.164299	0.355824	-290.775	192.624	-11.3569	0.202359	0.301875	-136.072	88.979	0.235727	0.234375	0.209821	-203.749	186.549	0.319114	0.20565	0.189831	31	12.4	-174.85	100.466	-5.28146
-37.6359	7.7455	-2.69278	0	0.116528	-176.741	39.642	-13.9219	0.0690883	0.329772	-193.164	46.5273	-5.42866	0.0733234	0.188376	-165.357	84.5855	-4.05376	0.139812	0.217555	-195.036	81.5908	-0.811834	0.151075	0.121237	-196.222	191.907	-10.8906	0.158381	0.350852	-279.03	185.509	-11.0072	0.192075	0.297338	-129.529	86.7095	0.420849	0.231186	0.207908	-200.94	179.98	0.852874	0.201977	0.187853	32	12.8	-170.977	99.6203	-5.16025
-37.5028	8.81705	-2.64026	0	0.110583	-177.759	42.6347	-14.0289	0.0694444	0.327991	-171.512	45.4028	-5.61729	0.0706408	0.2	-169.523	90.7955	-4.08665	0.138558	0.218809	-196.316	83.5264	-0.60003	0.16129	0.116935	-195.739	186.742	-10.7317	0.161222	0.346354	-267.901	180.558	-10.6944	0.184815	0.297943	-124.41	84.6505	0.587052	0.232143	0.204401	-198.131	173.457	1.36996	0.201977	0.185593	33	13.2	-168.691	99.6529	-5.03741
-37.3697	9.88859	-2.59203	0	0.109096	-178.777	45.7335	-14.1479	0.0730057	0.323718	-149.86	44.2782	-5.81879	0.0703428	0.210134	-173.689	97.0055	-4.10354	0.141066	0.22163	-197.597	85.4621	-0.404736	0.166129	0.114785	-195.775	184.531	-10.5636	0.164062	0.343277	-257.363	176.017	-10.362	0.184211	0.297036	-130.446	82.8667	0.766788	0.235969	0.203125	-197.34	171.094	1.88907	0.201695	0.181921	34	13.6	-166.895	100.23	-4.92234
-37.2365	10.9601	-2.53877	0.00148633	0.115636	-179.794	48.8322	-14.2528	0.0744302	0.31802	-128.208	43.1537	-6.01465	0.0727273	0.219672	-178.281	103.242	-4.14869	0.145455	0.223197	-198.878	87.3977	-0.246857	0.169355	0.112097	-197.819	183.415	-10.415	0.170928	0.335701	-246.826	173.668	-10.0271	0.184815	0.292801	-137.254	81.5046	0.955735	0.240753	0.201531	-197.76	169.892	2.38702	0.197175	0.178814	35	14	-165.259	101.53	-4.80583
-37.1034	12.0317	-2.49691	0.00267539	0.118014	-180.812	51.9309	-14.3801	0.0754986	0.305912	-106.556	42.0292	-6.20776	0.0748137	0.231297	-184.306	109.888	-4.21079	0.154859	0.222257	-200.158	89.3333	-0.0514397	0.175538	0.109409	-199.863	185.02	-10.2864	0.180398	0.329545	-236.288	174.703	-9.67641	0.186025	0.289776	-144.061	80.1426	1.13518	0.242985	0.201531	-198.18	168.69	2.92209	0.189831	0.174859	36	14.4	-165.2	103.711	-4.69192
-36.9703	13.1184	-2.44657	0.00505351	0.119203	-181.83	55.1836	-14.4886	0.0804843	0.306624	-97.3135	40.9046	-6.38989	0.0766021	0.245306	-191.367	116.535	-4.23405	0.161755	0.224765	-201.439	91.3296	0.139532	0.177419	0.10672	-201.907	190.312	-10.1394	0.18892	0.327178	-226.508	179.158	-9.37666	0.19389	0.284936	-150.869	79.37	1.27985	0.246173	0.196429	-198.6	167.489	3.42851	0.19435	0.168644	37	14.8	-168.948	106.529	-4.56994
-36.8372	14.3095	-2.393	0.00951249	0.119203	-183.058	58.7006	-14.6047	0.0883191	0.304843	-103.6	43.687	-6.57699	0.0801788	0.24769	-200.526	123.181	-4.27201	0.171473	0.226332	-202.72	93.3743	0.355833	0.181183	0.106183	-204.327	195.881	-9.97167	0.19768	0.329309	-232.764	183.637	-9.04281	0.200544	0.279794	-157.677	78.6918	1.44403	0.249681	0.193559	-199.02	167.297	3.93189	0.2	0.163277	38	15.2	-173.213	110.011	-4.45838
-36.704	15.5779	-2.33563	0.0172414	0.120095	-184.573	62.2176	-14.7182	0.0954416	0.30698	-109.887	47.7363	-6.76983	0.0819672	0.251565	-211.626	129.827	-4.33883	0.183699	0.229781	-204	95.419	0.555429	0.187366	0.10914	-206.817	202.458	-9.82746	0.208333	0.327178	-241.389	189.435	-8.76489	0.203872	0.280399	-164.484	80.1864	1.64702	0.256696	0.189413	-199.44	167.242	4.42696	0.20678	0.162994	39	15.6	-178.226	114.371	-4.34079
-39.0162	18.5937	-2.28614	0.0273484	0.119501	-186.089	65.7345	-14.8277	0.10755	0.30698	-116.173	52.0565	-6.96237	0.085842	0.250075	-224.824	136.491	-4.40217	0.194044	0.235737	-205.281	97.4637	0.740186	0.193548	0.109946	-211.488	210.497	-9.69434	0.21946	0.329782	-250.014	195.233	-8.4237	0.210526	0.278887	-171.292	86.0788	1.86188	0.261161	0.186543	-199.861	167.188	4.92724	0.216949	0.162429	40	16	-183.616	118.797	-4.22095
-42.9853	21.64	-2.2306	0.0324019	0.120987	-187.605	69.2515	-14.943	0.126425	0.310897	-122.515	56.693	-7.14398	0.0921013	0.23994	-238.239	143.411	-4.45862	0.201254	0.240439	-206.562	99.5083	0.921516	0.194892	0.112366	-216.904	218.537	-9.5322	0.231771	0.331913	-258.639	201.032	-8.10711	0.220206	0.276467	-178.099	91.9712	2.04802	0.262755	0.18463	-200.995	167.133	5.4574	0.230508	0.163277	41	16.4	-178.226	116.458	-4.11772
-49.1772	22.2165	-2.32701	0.0326992	0.114744	-183.028	64.0244	-15.7558	0.122507	0.323362	-115.032	55.4566	-7.04882	0.0921013	0.241729	-233.074	145.741	-3.83827	0.20094	0.238245	-204.769	98.8029	0.99644	0.197581	0.120161	-206.713	213.437	-9.493	0.226799	0.33428	-254.547	194.276	-7.73849	0.221113	0.279492	-173.893	91.427	2.47944	0.264031	0.179209	-183.803	162.742	5.66601	0.227684	0.162994	42	16.8	-173.426	114.329	-4.02444
-55.4592	22.793	-2.4227	0.0312128	0.110285	-178.797	58.7971	-16.5682	0.122507	0.332977	-111.106	54.3117	-6.95603	0.0974665	0.242623	-227.909	148.404	-3.25322	0.197179	0.236364	-203.172	98.5944	1.05846	0.202151	0.123925	-197.642	208.338	-9.46584	0.218277	0.339252	-250.455	187.52	-7.41742	0.218693	0.286449	-169.686	91.2094	2.9097	0.269133	0.170918	-166.61	158.996	5.89523	0.226271	0.161864	43	17.2	-169.232	112.567	-3.92636
-61.9547	23.3695	-2.52202	0.0294293	0.100178	-175.349	54.1101	-17.3741	0.125	0.337607	-109.978	54.2606	-6.84861	0.102534	0.244411	-223.075	151.44	-2.64758	0.201881	0.235423	-201.626	98.3858	1.13179	0.207527	0.123925	-189.403	203.448	-9.43276	0.211884	0.349195	-246.805	180.807	-7.09919	0.218693	0.294918	-165.479	92.0285	3.34389	0.273278	0.163265	-149.418	155.25	6.11139	0.226271	0.161864	44	17.6	-165.193	112.154	-3.82669
-68.4501	23.9459	-2.60915	0.0309156	0.100178	-171.902	58.7867	-18.1956	0.128205	0.339387	-109.504	54.3372	-6.72746	0.106408	0.239046	-218.529	154.477	-2.04471	0.204702	0.238558	-200.08	98.1773	1.19346	0.210484	0.129032	-181.165	198.978	-9.38252	0.20786	0.354403	-243.606	176.085	-6.78496	0.216576	0.300665	-161.272	92.8476	3.77653	0.270727	0.155931	-132.225	151.75	6.33418	0.230226	0.158192	45	18	-161.794	111.977	-3.71934
-74.9455	24.5224	-2.69345	0.0332937	0.100773	-168.55	63.4633	-18.9884	0.132479	0.341524	-109.991	54.9435	-6.62641	0.114158	0.237854	-213.983	157.513	-1.45153	0.20627	0.238558	-198.534	97.9688	1.27477	0.212634	0.133065	-174.29	194.508	-9.33671	0.206913	0.360559	-243.443	172.024	-6.45863	0.213854	0.302178	-157.066	94.5968	4.2164	0.27264	0.14764	-115.347	148.251	6.58991	0.232768	0.155085	46	18.4	-158.846	111.911	-3.61169
-81.4409	25.0988	-2.77782	0.0428062	0.103448	-166.199	68.1399	-19.8046	0.135328	0.347578	-111.03	55.5905	-6.50344	0.125484	0.23845	-209.437	160.55	-0.832953	0.20815	0.238871	-196.988	98.2529	1.35169	0.214516	0.137903	-168.285	190.038	-9.32054	0.203598	0.359375	-244.749	167.962	-6.11884	0.214156	0.30853	-152.859	96.8157	4.67696	0.272321	0.139668	-98.6249	144.753	6.82429	0.234746	0.152542	47	18.8	-156.009	112.013	-3.50586
-87.9364	25.6753	-2.8736	0.0541023	0.104043	-163.847	72.8165	-20.6229	0.141026	0.35292	-113.072	56.6818	-6.40725	0.138599	0.239642	-204.891	163.975	-0.233605	0.209718	0.238245	-195.442	98.6717	1.42101	0.214516	0.144624	-162.28	185.758	-9.22533	0.202888	0.357008	-246.055	164.252	-5.7952	0.212946	0.30732	-148.652	99.0346	5.12989	0.273597	0.131059	-81.9025	141.254	7.05417	0.235876	0.145763	48	19.2	-154.102	112.499	-3.40514
-94.4318	26.2518	-2.96414	0.0668847	0.105232	-161.496	77.8058	-21.4343	0.143875	0.356838	-119.45	57.7732	-6.28406	0.147243	0.239344	-200.851	167.461	0.337857	0.210031	0.239812	-193.896	99.1642	1.50036	0.21586	0.149731	-159.806	182.105	-9.20267	0.201705	0.359848	-247.361	162.318	-5.45854	0.213854	0.305203	-144.445	101.254	5.57055	0.269452	0.124043	-65.1801	138.36	7.28873	0.239548	0.139831	49	19.6	-155.327	113.244	-3.30386
-100.927	27.2053	-3.06805	0.0766944	0.106718	-167.963	83.057	-22.251	0.149929	0.357906	-132.988	58.8646	-6.17934	0.154694	0.237854	-197.484	170.946	0.967289	0.215987	0.239498	-192.35	100.528	1.56899	0.216935	0.15457	-165.499	178.452	-9.16073	0.205492	0.361032	-248.668	160.384	-5.12437	0.214459	0.30732	-140.238	103.932	6.01213	0.270089	0.115434	-51.827	135.827	7.50027	0.241525	0.133333	50	20	-158.76	114.637	-3.20869
-107.423	31.5031	-3.15781	0.0862069	0.107907	-177.028	88.3083	-23.0662	0.162037	0.362892	-146.527	59.9559	-6.0691	0.159165	0.235171	-194.118	174.432	1.53875	0.221003	0.239185	-190.805	101.891	1.64502	0.218011	0.159677	-171.437	174.799	-9.13337	0.209991	0.36411	-249.974	160.335	-4.79708	0.216878	0.3049	-136.032	106.801	6.43054	0.273597	0.110969	-55.5008	133.712	7.73109	0.245198	0.124576	51	20.4	-154.326	111.836	-3.14624
-110.378	31.7744	-3.46686	0.0862069	0.112961	-175.288	84.888	-23.2753	0.165954	0.366097	-146.086	58.0801	-6.00626	0.153502	0.232787	-183.098	175.127	1.99016	0.218495	0.235423	-188.46	101.745	1.67879	0.212903	0.158065	-166.059	168.905	-8.8759	0.206676	0.361506	-241.101	157.035	-4.48543	0.210526	0.300968	-122.54	102.513	6.49467	0.275829	0.107143	-55.9267	126.453	7.62995	0.248023	0.115819	52	20.8	-150.243	109.206	-3.07581
-113.401	32.4663	-3.77396	0.0870987	0.117717	-173.602	81.4676	-23.4765	0.169872	0.370014	-145.645	56.5897	-5.96553	0.149031	0.235171	-172.079	175.822	2.44621	0.217241	0.231348	-186.116	101.598	1.72558	0.21129	0.157527	-160.681	163.012	-8.60273	0.208807	0.363163	-232.229	154.482	-4.13397	0.208106	0.297036	-109.047	98.2253	6.57917	0.274235	0.102041	-59.3875	119.193	7.5195	0.25	0.111017	53	21.2	-146.285	106.838	-3.00822
-116.541	34.0085	-4.08015	0.088585	0.120987	-171.917	78.1484	-23.6924	0.173433	0.373932	-145.205	55.3159	-5.91409	0.139791	0.234873	-161.059	176.517	2.87985	0.22069	0.223824	-184.781	101.451	1.76083	0.21129	0.15672	-155.303	157.644	-8.30082	0.215672	0.366241	-223.356	152.374	-3.79952	0.202964	0.290684	-95.5549	94.1475	6.63352	0.274235	0.0959821	-62.8484	111.934	7.43884	0.255085	0.10678	54	21.6	-142.599	104.845	-2.93886
-119.68	36.3558	-4.37704	0.0906659	0.126635	-172.167	75.249	-23.8991	0.174145	0.377137	-144.764	54.623	-5.86535	0.136513	0.235768	-150.039	177.212	3.34385	0.220063	0.216928	-183.929	101.43	1.80401	0.209409	0.156183	-149.925	152.806	-8.02548	0.21875	0.371212	-214.512	150.942	-3.47821	0.19873	0.287054	-82.0625	90.2995	6.69626	0.273597	0.0902423	-66.3092	104.691	7.35131	0.260169	0.100847	55	22	-139.78	103.177	-2.87996
-122.82	38.9174	-4.67619	0.0891795	0.130499	-173.779	72.3496	-24.1125	0.178419	0.378205	-144.323	53.9628	-5.85334	0.133234	0.236364	-139.485	177.907	3.78553	0.22069	0.210658	-183.077	101.531	1.84512	0.208871	0.156452	-144.616	149.732	-7.77575	0.224905	0.374053	-211.577	149.99	-3.17341	0.195402	0.286449	-68.5701	86.4516	6.77278	0.269133	0.0867347	-69.7701	97.7531	7.26809	0.264124	0.0940678	56	22.4	-138.011	102.422	-2.81515
-125.96	41.8737	-4.99723	0.0876932	0.134661	-175.391	69.4502	-24.3216	0.184117	0.381766	-143.882	54.0445	-5.80967	0.132936	0.233681	-128.998	178.602	4.21765	0.222571	0.202821	-182.225	101.829	1.91246	0.21129	0.159946	-139.915	148.372	-7.51617	0.22964	0.373343	-208.642	149.523	-2.83513	0.192982	0.283424	-63.8526	86.5647	6.82649	0.266263	0.0845026	-73.2309	91.5372	7.18694	0.264407	0.090113	57	22.8	-137.014	102.353	-2.75036
-129.099	44.83	-5.31032	0.0870987	0.139715	-177.003	66.6403	-24.5193	0.188746	0.383191	-143.441	56.8596	-5.7829	0.128763	0.23696	-118.51	179.297	4.65328	0.226019	0.199373	-181.374	102.156	1.96999	0.21371	0.162903	-139.879	147.417	-7.2422	0.234138	0.370265	-205.707	149.504	-2.5076	0.1951	0.284332	-61.4178	89.155	6.87892	0.256696	0.0835459	-76.6918	85.3213	7.10691	0.266949	0.0844633	58	23.2	-136.334	102.65	-2.68069
-132.239	47.7864	-5.61142	0.087396	0.142985	-178.615	64.1743	-24.7456	0.193376	0.381766	-143	62.3271	-5.74238	0.128465	0.235171	-108.435	179.992	5.11308	0.230094	0.195298	-180.522	102.483	2.02526	0.216129	0.16371	-142.288	146.751	-6.97373	0.241951	0.367424	-202.772	149.485	-2.16094	0.19994	0.282819	-58.9831	91.7452	6.96598	0.252232	0.080676	-80.1526	79.1054	7.00345	0.266949	0.0793785	59	23.6	-135.742	103.499	-2.61602
-135.378	50.7427	-5.91471	0.0897741	0.145957	-180.228	66.3574	-24.9547	0.194088	0.381766	-142.559	67.7946	-5.70728	0.131446	0.241431	-99.1211	180.688	5.58027	0.233542	0.190596	-179.67	102.81	2.0605	0.216667	0.166935	-144.696	146.337	-6.72304	0.249053	0.369318	-199.837	149.533	-1.8269	0.203569	0.280399	-56.574	94.3355	7.02901	0.24713	0.0787628	-83.6135	72.8895	6.91266	0.267232	0.0740113	60	24	-135.352	104.459	-2.54692
-138.518	53.6991	-6.21537	0.0909631	0.14893	-182.045	68.7026	-25.1335	0.198006	0.378917	-142.119	73.2621	-5.67825	0.132936	0.241431	-91.0247	181.383	6.01171	0.240125	0.187774	-178.818	103.136	2.10599	0.21828	0.168817	-147.105	145.923	-6.40466	0.257102	0.373343	-196.902	150.185	-1.50654	0.206897	0.283122	-54.5584	96.9258	7.09109	0.241071	0.0746173	-87.0743	66.9178	6.8073	0.268362	0.0728814	61	24.4	-129.704	100.247	-2.41224
-134.361	53.5756	-5.91318	0.0927467	0.148038	-178.694	69.3411	-24.4361	0.198362	0.378917	-136.387	67.9314	-5.46244	0.128465	0.237258	-85.8649	174.029	6.06004	0.239812	0.183072	-174.59	99.4215	2.06488	0.218548	0.164516	-141.427	140.166	-6.0473	0.257339	0.369555	-180.767	143.139	-1.31699	0.204174	0.278282	-50.0874	90.191	6.91814	0.239796	0.0672832	-85.1611	64.4294	6.42275	0.266667	0.0717514	62	24.8	-124.062	96.8811	-2.27283
-130.204	53.8815	-5.61967	0.0957194	0.146849	-175.39	69.9796	-23.7344	0.201567	0.376425	-130.655	67.1553	-5.23569	0.124292	0.233681	-80.7051	167.751	6.15158	0.240752	0.179937	-170.362	95.9159	2.02648	0.219355	0.162366	-135.748	134.409	-5.73324	0.258286	0.3634	-164.631	136.245	-1.0962	0.205384	0.267393	-45.6164	83.4559	6.74762	0.240115	0.0567602	-83.2476	63.1378	6.03811	0.265537	0.069209	63	25.2	-118.573	94.1052	-2.13691
-126.046	56.447	-5.30929	0.0980975	0.146254	-172.085	70.618	-23.037	0.20406	0.374288	-124.923	66.3793	-5.02116	0.118331	0.2307	-75.5454	161.472	6.21546	0.24232	0.174295	-166.134	95.0084	1.98994	0.217473	0.160215	-130.07	128.672	-5.42083	0.256866	0.358191	-149.869	129.432	-0.906689	0.201149	0.260133	-41.1454	77.0717	6.5854	0.240753	0.049426	-81.3342	61.8461	5.67191	0.263842	0.0666667	64	25.6	-113.161	91.5893	-1.99439
-121.889	59.0123	-5.00741	0.100476	0.145363	-168.78	71.2565	-22.3254	0.205128	0.373932	-119.192	66.5312	-4.80109	0.114456	0.226528	-70.3856	155.193	6.28217	0.24326	0.174922	-161.906	94.1009	1.96022	0.217204	0.156989	-124.391	123.499	-5.07811	0.26018	0.351326	-135.814	122.97	-0.68618	0.198125	0.251059	-36.6743	71.1853	6.4069	0.242666	0.0446429	-79.4208	60.5545	5.29936	0.257627	0.0655367	65	26	-108.182	89.3086	-1.8567
-117.88	61.5778	-4.71004	0.105826	0.142093	-165.475	71.895	-21.6144	0.207621	0.372151	-113.46	66.7512	-4.60816	0.112668	0.223249	-65.5506	150.648	6.33929	0.242947	0.175549	-157.678	93.1934	1.9207	0.21586	0.152688	-120.418	118.641	-4.75523	0.263968	0.347064	-123.462	116.509	-0.452967	0.193285	0.237145	-32.2033	65.2989	6.24615	0.246811	0.0408163	-77.5073	59.2629	4.92437	0.251412	0.0629944	66	26.4	-104.757	87.3881	-1.7136
-114.222	64.1432	-4.39303	0.107313	0.141498	-162.497	72.5334	-20.8858	0.207621	0.371083	-107.728	66.9712	-4.39569	0.112966	0.219374	-70.4746	148.496	6.40601	0.245768	0.175862	-153.45	92.34	1.88506	0.215591	0.150269	-118.594	113.783	-4.41578	0.266098	0.339962	-112.518	110.047	-0.254192	0.194192	0.224743	-27.7323	60.2076	6.08613	0.249043	0.0420918	-75.5939	57.9712	4.54498	0.244068	0.0615819	67	26.8	-102.723	86.554	-1.58247
-114.852	66.7086	-4.08577	0.108205	0.141498	-165.029	73.1719	-20.1723	0.207621	0.369302	-101.996	67.8471	-4.18426	0.109091	0.216095	-75.3985	147.853	6.46816	0.244514	0.179937	-149.411	92.7193	1.84493	0.214247	0.148387	-117.535	108.925	-4.09318	0.27107	0.339015	-103.345	103.586	-0.0563238	0.19873	0.210829	-23.2612	59.2372	5.88963	0.253827	0.0424107	-73.6805	58.938	4.14686	0.228814	0.0627119	68	27.2	-101.315	85.8628	-1.44141
-115.481	69.274	-3.77268	0.111772	0.140606	-167.985	73.8104	-19.4795	0.209046	0.366453	-96.2647	69.3428	-3.96455	0.105812	0.214009	-80.3225	147.21	6.51574	0.248903	0.178997	-145.783	93.0985	1.81895	0.212366	0.144086	-116.898	104.067	-3.74759	0.276042	0.337121	-94.1724	97.1241	0.165383	0.204477	0.205989	-23.1618	58.3095	5.71861	0.253827	0.0430485	-71.767	60.529	3.77294	0.20339	0.0649718	69	27.6	-101.841	85.3155	-1.30523
-116.111	71.8394	-3.47081	0.11415	0.140606	-170.941	74.5896	-18.7885	0.208689	0.364316	-96.6569	71.4504	-3.74747	0.104322	0.213711	-85.2464	146.567	6.57467	0.247649	0.178997	-142.156	93.4778	1.78187	0.210215	0.140591	-116.769	99.7008	-3.40803	0.283381	0.330492	-90.5383	90.6625	0.365121	0.208409	0.201754	-28.3004	57.3818	5.5389	0.253508	0.044324	-69.8536	62.1706	3.40718	0.193503	0.0731638	70	28	-102.77	84.9735	-1.16457
-116.741	74.4048	-3.1476	0.116231	0.140012	-173.896	75.697	-18.0635	0.208689	0.360755	-98.2182	74.2656	-3.52869	0.100447	0.209538	-90.1704	145.924	6.62317	0.247649	0.175235	-139.265	93.857	1.7412	0.206989	0.136828	-116.639	95.8815	-3.05557	0.286222	0.329545	-88.6239	84.201	0.568927	0.212341	0.198427	-33.439	56.4542	5.36373	0.25287	0.0459184	-67.9402	64.0764	3.01713	0.188983	0.0819209	71	28.4	-100.577	81.253	-1.19949
-117.096	74.5456	-2.9983	0.116231	0.140309	-174.267	73.1544	-17.7453	0.206553	0.360043	-93.825	69.9966	-3.48368	0.0965723	0.212221	-87.9282	138.288	6.28618	0.244514	0.171473	-134.353	92.9219	1.87654	0.204839	0.132258	-111.634	90.0774	-3.18965	0.279119	0.325284	-87.0521	77.2333	0.549933	0.205687	0.18542	-32.9034	54.965	5.24178	0.252551	0.0411352	-66.1353	60.0953	2.66714	0.183616	0.090113	72	28.8	-98.4885	77.5693	-1.23167
-117.45	74.7306	-2.82986	0.115933	0.139417	-174.837	70.6116	-17.4187	0.204416	0.358974	-89.4314	65.7273	-3.42902	0.0959762	0.218182	-85.6857	130.651	5.96142	0.240752	0.168966	-130.178	91.9868	1.98881	0.2	0.126344	-106.628	84.2732	-3.33654	0.272254	0.321496	-85.4804	70.2655	0.516581	0.199032	0.171506	-32.3752	53.4758	5.12936	0.251913	0.0385842	-64.3304	56.4023	2.33297	0.174294	0.0949153	73	29.2	-96.4292	73.9906	-1.26763
-117.805	74.9155	-2.65755	0.115042	0.137634	-175.407	68.0688	-17.1745	0.195513	0.358974	-85.0378	61.458	-3.37008	0.0986587	0.216393	-83.4432	123.015	5.62652	0.238871	0.166458	-126.003	91.0516	2.11532	0.192473	0.120699	-101.622	79.4135	-3.43475	0.266572	0.314157	-83.9086	63.2978	0.500706	0.198125	0.158197	-32.1101	51.9866	5.01228	0.25	0.0353954	-62.5256	52.7092	1.97341	0.165537	0.0980226	74	29.6	-94.7184	70.9269	-1.29728
-118.16	75.1005	-2.48702	0.114744	0.137039	-175.978	65.526	-16.8711	0.190171	0.358262	-83.781	59.9652	-3.31461	0.100447	0.216095	-81.2007	115.378	5.30456	0.236991	0.163636	-121.827	90.1165	2.23974	0.19086	0.114516	-96.6158	75.7004	-3.57639	0.258523	0.307055	-82.3369	56.33	0.49936	0.199335	0.148215	-31.845	50.4975	4.90091	0.243941	0.0344388	-60.7207	49.7279	1.62898	0.161582	0.105367	75	30	-93.1822	68.5619	-1.33151
-118.515	75.2855	-2.32169	0.114447	0.137337	-176.548	62.9832	-16.5682	0.187322	0.356481	-83.5261	63.6092	-3.25319	0.104322	0.215201	-78.9582	107.742	4.95168	0.232602	0.162069	-117.652	89.1814	2.36541	0.186022	0.107796	-91.6098	72.7273	-3.70676	0.251657	0.298059	-80.7651	49.3623	0.490641	0.201452	0.140653	-31.5799	49.0083	4.78384	0.247768	0.0379464	-59.4858	47.1587	1.27465	0.155085	0.111017	76	30.4	-91.7383	66.4088	-1.36283
-118.87	75.4704	-2.15231	0.11415	0.136147	-177.119	60.4404	-16.2471	0.178775	0.354701	-83.2711	67.2533	-3.1875	0.10611	0.219672	-76.7157	100.105	4.63288	0.229154	0.156113	-113.477	88.2463	2.48248	0.180108	0.1	-86.6039	70.6094	-3.83946	0.241714	0.293087	-79.1934	42.3945	0.464058	0.202662	0.135814	-31.3148	47.5191	4.64683	0.245217	0.0392219	-59.0808	45.6408	0.934638	0.15	0.115819	77	30.8	-90.8482	65.5867	-1.39928
-119.225	75.6828	-1.98061	0.113853	0.13585	-177.689	57.8976	-15.9478	0.168803	0.352208	-83.0161	70.8973	-3.13791	0.110879	0.219672	-74.4732	92.4685	4.28306	0.226019	0.146708	-109.301	87.3111	2.60297	0.176882	0.0930108	-84.1422	68.4915	-3.95336	0.234375	0.289773	-80.0614	44.9061	0.41161	0.202359	0.130672	-31.0497	46.0299	4.53642	0.240434	0.0459184	-58.6758	46.5955	0.592129	0.141243	0.120056	78	31.2	-90.5959	65.496	-1.43639
-119.58	76.1487	-1.80732	0.11415	0.137931	-178.259	55.3548	-15.6708	0.161681	0.351496	-82.7612	74.5529	-3.08051	0.115648	0.223845	-72.2307	84.832	3.93863	0.218182	0.141379	-105.126	86.376	2.73214	0.172581	0.0932796	-84.2494	66.3736	-4.09601	0.221828	0.287169	-83.9352	52.4865	0.411472	0.200544	0.127647	-30.7846	44.5407	4.4037	0.237245	0.051977	-58.4374	48.799	0.241232	0.128814	0.124011	79	31.6	-90.5158	66.128	-1.4706
-119.935	76.6146	-1.63895	0.112366	0.139417	-178.83	52.812	-15.3731	0.154915	0.348647	-82.5062	78.4941	-3.03191	0.120417	0.227124	-69.9882	82.0058	3.62717	0.21442	0.138558	-101.038	85.4409	2.85947	0.172043	0.0943548	-85.5181	64.2557	-4.23998	0.214962	0.288116	-87.809	60.77	0.386156	0.196612	0.127949	-30.5195	43.7565	4.28437	0.234375	0.0605867	-58.4989	51.0025	-0.108626	0.126554	0.129379	80	32	-91.1922	68.0685	-1.50069
-120.29	77.0805	-1.46467	0.110583	0.138823	-180.54	52.227	-15.0573	0.149217	0.343305	-82.2512	82.4353	-2.96316	0.123994	0.228018	-71.1041	84.6184	3.31168	0.214107	0.136364	-97.0931	84.6931	2.98777	0.172043	0.0946237	-87.5274	63.4841	-4.38656	0.213778	0.29143	-91.6828	69.0534	0.357868	0.19389	0.130369	-31.6806	45.819	4.16493	0.229592	0.0688776	-58.5603	53.206	-0.456788	0.123729	0.133898	81	32.4	-88.1195	64.9504	-1.53527
-119.714	75.055	-1.46228	0.111474	0.136445	-174.952	51.8501	-14.9007	0.149217	0.345798	-76.419	78.3535	-2.82169	0.120417	0.228912	-72.7076	75.5053	2.80558	0.210972	0.130721	-91.4945	82.5691	2.97246	0.170161	0.0930108	-86.0333	63.2446	-4.1478	0.214252	0.278883	-82.3538	66.5041	0.322141	0.18784	0.129764	-31.7742	41.8695	3.8604	0.228635	0.0663265	-57.6279	49.6027	-0.44558	0.121186	0.131921	82	32.8	-85.1363	62.3	-1.55179
-119.137	73.0294	-1.43702	0.111772	0.136147	-169.363	52.9571	-14.7214	0.146011	0.348647	-70.5865	74.8772	-2.65468	0.114456	0.225931	-74.4718	66.7666	2.37335	0.20815	0.125705	-85.8957	80.4449	2.94481	0.168548	0.0943548	-84.539	63.7385	-3.9127	0.214489	0.272017	-73.0241	64.968	0.302713	0.185723	0.132789	-32.0831	37.9197	3.55181	0.224171	0.065051	-57.1264	45.999	-0.412981	0.120339	0.132203	83	33.2	-83.0581	60.022	-1.57541
-118.561	71.0038	-1.41018	0.11088	0.135256	-163.775	54.2312	-14.5206	0.144231	0.348291	-68.3982	71.4008	-2.53535	0.115946	0.221759	-76.3617	59.0288	1.93005	0.204702	0.123197	-80.2969	78.3208	2.92758	0.169892	0.0938172	-83.0447	64.2324	-3.68076	0.217093	0.268939	-68.0089	64.641	0.27876	0.177556	0.136721	-32.4519	33.9699	3.24079	0.221301	0.0631378	-56.6248	43.3691	-0.408972	0.122034	0.129096	84	33.6	-81.3366	58.5229	-1.59796
-117.985	68.9781	-1.39542	0.11088	0.134661	-158.186	55.5054	-14.3129	0.14245	0.349715	-66.8827	70.0447	-2.41179	0.118927	0.21699	-78.2517	52.4792	1.46515	0.20094	0.124451	-74.6981	76.3731	2.9119	0.173118	0.094086	-81.5504	64.7263	-3.43009	0.216146	0.265625	-65.5318	64.3139	0.241605	0.175439	0.135511	-32.8208	31.3362	2.93766	0.212054	0.0615434	-56.1233	42.9497	-0.387734	0.120621	0.126271	85	34	-79.9651	58.4167	-1.6217
-117.408	66.9525	-1.36966	0.111177	0.134958	-152.598	56.7795	-14.132	0.138533	0.35114	-68.5164	75.2072	-2.26331	0.122802	0.215201	-80.1416	50.9751	0.990686	0.194357	0.126332	-69.0994	74.4466	2.88835	0.173925	0.0959677	-80.056	65.2202	-3.18842	0.222775	0.263021	-63.0546	63.9869	0.223211	0.179673	0.138234	-33.1897	29.6522	2.63671	0.197385	0.0634566	-55.6218	42.5303	-0.380858	0.122599	0.122881	86	34.4	-78.9013	58.4838	-1.6381
-116.832	66.4592	-1.34702	0.111177	0.136742	-148.003	58.0537	-13.9306	0.135684	0.354701	-71.4769	80.3698	-2.1141	0.129657	0.214903	-82.0316	49.471	0.551333	0.182445	0.130408	-63.5006	72.5202	2.86715	0.171774	0.0967742	-79.0106	65.7141	-2.93628	0.228693	0.265388	-60.5774	63.6598	0.186844	0.184513	0.140351	-33.5585	27.9683	2.34039	0.19037	0.0717474	-55.1202	42.1382	-0.360654	0.122881	0.117232	87	34.8	-78.4018	58.8904	-1.65857
-116.256	66.5909	-1.32257	0.112069	0.135553	-143.732	59.3278	-13.7412	0.136396	0.356125	-74.4373	85.5324	-1.94053	0.135022	0.215797	-83.9215	47.9669	0.0744911	0.178997	0.142633	-57.9018	70.6096	2.84734	0.173387	0.0943548	-78.0502	66.2081	-2.7271	0.233191	0.267756	-62.7723	64.4851	0.170307	0.188143	0.146098	-33.9274	27.4049	2.03427	0.182079	0.0809949	-54.6187	41.888	-0.322221	0.123729	0.114972	88	35.2	-78.5111	59.3819	-1.6795
-115.68	66.7226	-1.30123	0.113555	0.13585	-140.836	60.602	-13.5463	0.133547	0.357906	-77.3978	90.6949	-1.79732	0.139791	0.214009	-86.2235	46.4628	-0.373621	0.174922	0.161442	-52.303	68.7294	2.81323	0.173656	0.0922043	-77.0897	66.702	-2.48422	0.236742	0.269886	-68.6562	65.5477	0.152147	0.19268	0.147005	-34.2963	27.338	1.72492	0.173151	0.0883291	-54.1172	41.6378	-0.303106	0.122881	0.114124	89	35.6	-78.9634	59.9357	-1.70276
-115.103	66.8543	-1.2756	0.113853	0.135256	-139.261	61.8761	-13.3707	0.133191	0.35933	-80.3582	95.8575	-1.64308	0.148137	0.214307	-89.6325	44.9587	-0.80683	0.177116	0.167398	-46.7043	66.8492	2.77785	0.177419	0.0919355	-76.1293	67.1959	-2.2303	0.244792	0.27036	-75.201	66.6102	0.114633	0.196915	0.145191	-34.6651	27.8318	1.4061	0.16486	0.0950255	-53.6156	41.3875	-0.296929	0.124576	0.110734	90	36	-79.84	60.7792	-1.71947
-114.527	66.986	-1.25132	0.115339	0.136445	-138.86	63.1502	-13.1704	0.13141	0.358262	-83.5978	101.153	-1.49191	0.154694	0.211624	-93.0414	44.5079	-1.27287	0.179624	0.173981	-41.7378	64.969	2.74057	0.177688	0.0905914	-76.0266	68.5813	-1.96702	0.247159	0.268703	-82.6213	67.7918	0.0999598	0.201452	0.152753	-35.034	28.7364	1.1108	0.15912	0.104911	-53.1141	41.1373	-0.273037	0.128531	0.112712	91	36.4	-76.879	58.5271	-1.72308
-112.551	65.5916	-1.39946	0.112663	0.138228	-136.015	62.8094	-13.0009	0.126068	0.35755	-76.8888	97.1525	-1.35339	0.151714	0.205365	-87.0104	43.0206	-1.44572	0.176489	0.170219	-42.3825	60.4659	2.52474	0.173925	0.0865591	-75.2984	66.0066	-1.88621	0.242898	0.268229	-80.0307	64.7331	0.0705222	0.202359	0.153962	-30.3028	27.4853	1.20611	0.149235	0.0924745	-51.4317	39.4789	-0.223471	0.125989	0.110169	92	36.8	-74.9523	56.6404	-1.72612
-110.628	64.4336	-1.56456	0.111474	0.137931	-133.914	62.4685	-12.7788	0.121439	0.353989	-75.9633	93.152	-1.21257	0.151416	0.196721	-80.9791	42.5866	-1.63718	0.171787	0.166771	-43.0271	55.9628	2.29818	0.170968	0.0801075	-74.5701	64.3233	-1.78477	0.234375	0.2616	-77.624	61.7933	0.0283262	0.205384	0.155172	-27.4611	27.2229	1.31489	0.139987	0.0803571	-50.4032	37.8205	-0.198616	0.124294	0.105932	93	37.2	-74.1293	55.0793	-1.72862
-109.203	63.3444	-1.70814	0.10761	0.137931	-131.813	62.1276	-12.5846	0.122151	0.349003	-78.3943	89.1515	-1.08205	0.153204	0.189866	-75.0511	42.1526	-1.83387	0.165517	0.161755	-43.7853	52.1204	2.09246	0.16371	0.0790323	-73.8418	62.7912	-1.68293	0.230114	0.253551	-75.2174	58.8535	-0.00138971	0.205082	0.16092	-29.9939	28.7188	1.39981	0.141263	0.0711097	-49.8635	36.4538	-0.156881	0.123729	0.103672	94	37.6	-73.69	53.5844	-1.73258
-107.794	62.7184	-1.86075	0.105232	0.138228	-130.62	61.7867	-12.3946	0.12037	0.345085	-80.8253	85.151	-0.940112	0.154694	0.185991	-70.2421	41.7186	-2.0588	0.157053	0.161442	-44.9618	48.3431	1.87127	0.157796	0.0755376	-73.1135	61.2864	-1.56977	0.225616	0.244318	-72.8108	55.9137	-0.0246165	0.205989	0.162129	-32.6762	30.2146	1.49976	0.147321	0.0628189	-50.1668	35.1274	-0.115691	0.125989	0.102542	95	38	-73.4761	52.1097	-1.73617
-106.384	62.1384	-2.01281	0.103746	0.138823	-129.502	61.4459	-12.1963	0.119658	0.341168	-83.2563	81.1505	-0.785053	0.150224	0.18003	-66.4188	41.2846	-2.24507	0.146708	0.160502	-46.1383	44.5659	1.63732	0.155914	0.0744624	-72.7274	59.7816	-1.47074	0.222538	0.235085	-70.6006	52.9739	-0.0696663	0.205384	0.162734	-35.3585	31.7105	1.59706	0.151786	0.0522959	-50.8994	33.9363	-0.0803269	0.130226	0.0980226	96	38.4	-73.7958	50.7708	-1.74372
-104.975	61.8073	-2.17566	0.101665	0.141498	-128.554	61.105	-12.0032	0.118946	0.341168	-85.6872	77.15	-0.653089	0.151118	0.174963	-66.1966	40.8506	-2.4418	0.142633	0.157994	-47.3148	40.872	1.41875	0.159677	0.0776882	-72.4027	58.2768	-1.37883	0.219223	0.220407	-68.9087	50.0341	-0.10008	0.207502	0.165457	-38.0408	33.2064	1.68548	0.158801	0.0436862	-52.0826	33.6354	-0.0450426	0.131921	0.0951977	97	38.8	-74.7497	49.6116	-1.7491
-103.565	62.156	-2.32183	0.0980975	0.141201	-129.296	60.7641	-11.8165	0.116453	0.338675	-88.1182	73.1495	-0.513173	0.1538	0.168107	-69.2662	40.5821	-2.64612	0.142006	0.163323	-49.0836	37.9497	1.19113	0.158065	0.0827957	-72.078	56.772	-1.28576	0.212831	0.210938	-67.3515	47.0943	-0.134181	0.207199	0.166062	-40.7231	34.7023	1.77595	0.16199	0.0446429	-53.2658	33.3344	0.00863384	0.129096	0.0963277	98	39.2	-76.105	48.6649	-1.7527
-102.156	62.5108	-2.48696	0.0951249	0.142985	-130.929	60.4232	-11.6183	0.117877	0.336538	-90.5492	69.149	-0.386744	0.1538	0.163934	-74.4093	40.4988	-2.83878	0.142006	0.17116	-51.0649	35.2504	0.981724	0.157258	0.0870968	-71.7533	55.2672	-1.17982	0.205019	0.209754	-65.7942	44.578	-0.165305	0.209921	0.167877	-43.4054	36.1981	1.86087	0.169005	0.0538903	-54.8839	34.1084	0.0590074	0.128249	0.0980226	99	39.6	-77.906	48.4464	-1.75618
-100.747	63.471	-2.65073	0.0933413	0.143876	-133.832	60.0823	-11.4221	0.11859	0.332265	-92.9801	65.1485	-0.231005	0.156781	0.160954	-80.7246	40.4156	-3.04498	0.140125	0.177429	-53.724	33.7143	0.764063	0.153495	0.0932796	-71.4286	53.7624	-1.08582	0.200284	0.210701	-64.9709	43.5628	-0.198707	0.210829	0.168784	-46.0877	37.694	1.95517	0.177615	0.0625	-56.6594	38.1665	0.108453	0.128814	0.10452	100	40	-80.7289	49.4104	-1.75539
-105.241	64.4311	-2.80947	0.0900713	0.144768	-138.075	59.7414	-11.228	0.12037	0.329772	-95.4109	61.1479	-0.0697535	0.158569	0.159463	-87.1411	40.3324	-3.2168	0.142633	0.182445	-57.3477	38.41	0.535772	0.151613	0.0989247	-71.1038	52.2575	-0.979217	0.200284	0.210464	-64.8838	46.9586	-0.239646	0.211736	0.170599	-48.77	39.1898	2.04963	0.187181	0.0695153	-58.5875	42.2246	0.158922	0.133051	0.111017	101	40.4	-78.1218	46.8245	-1.82168
-105.154	59.6217	-3.09593	0.0865042	0.144768	-138.371	56.1888	-11.3023	0.116097	0.326211	-86.7578	51.614	-0.114941	0.156781	0.154694	-86.2904	41.0049	-3.24886	0.142947	0.183072	-54.8631	40.9501	0.432792	0.147312	0.0962366	-66.6274	48.1146	-1.09725	0.193655	0.202888	-62.3038	44.8627	-0.15979	0.206594	0.15971	-47.8706	36.5904	1.92357	0.183355	0.0669643	-54.8578	42.4729	0.267551	0.126836	0.10226	102	40.8	-75.9318	44.6864	-1.88479
-105.068	54.9642	-3.38676	0.0838288	0.146254	-139.699	53.2707	-11.3769	0.112179	0.321581	-78.1047	43.7654	-0.140104	0.154993	0.152906	-86.0099	41.6774	-3.24863	0.144514	0.182132	-53.2146	43.9581	0.32634	0.139785	0.0927419	-63.1507	44.5475	-1.23977	0.189631	0.193419	-59.8867	42.7668	-0.0835223	0.199335	0.150938	-46.9713	34.5057	1.80015	0.17889	0.0644133	-51.2809	42.7213	0.386142	0.123164	0.0915254	103	41.2	-73.9536	43.3477	-1.94775
-104.982	50.3067	-3.66742	0.0814507	0.14566	-141.027	50.4943	-11.458	0.110399	0.320869	-69.4515	40.1413	-0.191457	0.154396	0.149627	-85.7294	42.3499	-3.26442	0.143574	0.184013	-52.5339	46.9888	0.22084	0.134946	0.0908602	-59.7223	41.0365	-1.36272	0.18679	0.184659	-57.7047	40.8694	0.00526735	0.18905	0.143678	-46.0719	34.9727	1.67426	0.173151	0.0695153	-48.3595	42.9697	0.513988	0.121469	0.0861582	104	41.6	-72.4005	42.5364	-2.00509
-104.896	45.6492	-3.95363	0.0775862	0.146552	-142.355	47.883	-11.5292	0.111823	0.323362	-63.2692	40.5159	-0.177299	0.15082	0.143666	-85.4489	43.0224	-3.27553	0.141379	0.188401	-52.3023	50.0195	0.108872	0.131452	0.0889785	-56.7984	38.0029	-1.47666	0.182292	0.183949	-55.5226	38.9924	0.0773516	0.182396	0.138234	-45.1726	35.5247	1.54526	0.164541	0.0778061	-45.8395	43.2181	0.635034	0.119209	0.0810734	105	42	-71.5164	42.0001	-2.06842
-104.81	41.1111	-4.23692	0.0746136	0.147444	-143.683	45.314	-11.6156	0.110755	0.321225	-59.8597	42.6938	-0.199545	0.15082	0.14456	-85.4208	43.6949	-3.29763	0.139812	0.192163	-52.7172	53.0502	0.0267512	0.131989	0.0905914	-55.5014	35.4786	-1.61264	0.17732	0.184422	-53.3406	37.1154	0.144441	0.179068	0.137931	-44.2732	36.0766	1.42902	0.160714	0.0813138	-44.0412	43.4665	0.746282	0.116949	0.0742938	106	42.4	-71.7757	42.0754	-2.13424
-105.213	36.8937	-4.52552	0.0692628	0.149227	-145.762	42.7451	-11.6913	0.108974	0.320869	-60.6191	45.7684	-0.225081	0.14307	0.14158	-86.1358	44.4203	-3.32556	0.140752	0.196552	-54.7752	56.0808	-0.0922646	0.132796	0.0916667	-55.5231	33.4888	-1.72491	0.17661	0.184896	-51.1846	38.938	0.221839	0.178463	0.144888	-43.3739	36.6285	1.29882	0.156569	0.0896046	-43.3945	43.7148	0.855809	0.118362	0.070904	107	42.8	-72.5613	43.0268	-2.19921
-106.08	35.9812	-4.81073	0.0662901	0.150713	-147.905	40.1761	-11.7634	0.108618	0.319088	-62.5617	50.8277	-0.266192	0.140686	0.144858	-86.8508	45.5113	-3.3426	0.142006	0.200627	-59.4621	59.1115	-0.189513	0.136022	0.0986559	-55.5448	32.0172	-1.85643	0.168561	0.189867	-49.1067	42.4724	0.296411	0.169994	0.15608	-42.4745	37.1805	1.16405	0.158801	0.09375	-43.0658	43.9632	0.975563	0.122034	0.0661017	108	43.2	-73.7224	44.756	-2.2608
-106.947	36.2245	-5.10418	0.0627229	0.151902	-150.048	38.4351	-11.8395	0.106838	0.319088	-65.3072	56.6513	-0.264575	0.139195	0.145455	-88.6947	46.6022	-3.35411	0.143574	0.202508	-65.2733	62.1422	-0.296221	0.138978	0.104301	-55.5666	34.7605	-1.97063	0.159328	0.194129	-47.1677	46.0445	0.351819	0.172111	0.159407	-41.7596	37.7324	1.03124	0.158163	0.100128	-42.7372	44.2116	1.09891	0.124011	0.0624294	109	43.6	-75.126	47.3992	-2.32613
-108.381	36.4678	-5.38899	0.0579667	0.152497	-152.191	43.5634	-11.8916	0.107906	0.317308	-68.0527	63.6326	-0.330894	0.145156	0.145455	-91.7025	47.8909	-3.39379	0.146708	0.204389	-71.0845	65.1729	-0.42958	0.142473	0.110753	-56.021	37.5038	-2.09034	0.15483	0.200994	-45.2287	49.6166	0.462766	0.175741	0.165759	-41.0637	38.2843	0.904898	0.158801	0.106824	-42.4086	44.4599	1.22238	0.129661	0.0587571	110	44	-77.9049	50.133	-2.38165
-110.499	36.8278	-5.67291	0.053805	0.156361	-154.334	49.0453	-11.9743	0.105057	0.313746	-74.6446	70.6135	-0.329294	0.147243	0.147839	-95.5554	49.5276	-3.39221	0.151097	0.208464	-77.4414	68.2032	-0.527795	0.144624	0.117473	-56.8882	40.2468	-2.20295	0.153646	0.212121	-49.021	53.1883	0.524395	0.183001	0.167272	-40.3676	38.8361	0.789488	0.164541	0.110651	-42.3933	44.7082	1.35069	0.134181	0.0550847	111	44.4	-75.8254	47.9933	-2.43641
-107.894	34.2234	-5.76103	0.0484542	0.155767	-149.997	48.3961	-11.8853	0.0982906	0.316595	-77.2542	69.1871	-0.423668	0.149329	0.146647	-90.4859	47.5406	-3.47153	0.146708	0.207837	-74.9493	65.5811	-0.544852	0.14328	0.117473	-55.8286	38.2647	-2.15878	0.143703	0.207386	-48.3884	50.4712	0.399675	0.179976	0.167574	-36.5545	36.178	0.756649	0.157844	0.100765	-41.0764	42.0978	1.16122	0.120056	0.0522599	112	44.8	-73.8445	45.8953	-2.49166
-105.574	31.6191	-5.8528	0.0434007	0.155172	-145.661	48.1215	-11.813	0.0950855	0.315171	-79.8638	67.7607	-0.487875	0.150522	0.145156	-85.4164	45.5536	-3.5488	0.141693	0.205643	-72.4573	62.9589	-0.567956	0.141935	0.116935	-55.3716	36.2827	-2.12342	0.143466	0.202888	-47.7558	47.754	0.280826	0.180278	0.163339	-32.7415	33.5199	0.707373	0.15051	0.0876913	-39.7596	39.4875	0.980727	0.10791	0.0516949	113	45.2	-72.193	43.8324	-2.54837
-103.529	29.0148	-5.94146	0.0371581	0.155172	-141.324	47.8861	-11.7232	0.0943732	0.314103	-82.4733	66.3344	-0.573284	0.152906	0.146945	-80.3469	43.5666	-3.63897	0.134483	0.205643	-69.966	60.3367	-0.610157	0.141667	0.120968	-56.4201	34.3006	-2.0907	0.141809	0.201705	-48.2315	45.0368	0.179753	0.176649	0.160617	-29.0034	30.8619	0.66559	0.140944	0.0768495	-38.4427	37.1538	0.797135	0.0974576	0.0545198	114	45.6	-70.9082	41.9275	-2.60388
-102.022	26.4105	-6.02804	0.0312128	0.155172	-136.988	47.6508	-11.6425	0.0911681	0.314103	-85.6351	65.3545	-0.647379	0.151714	0.143368	-75.2774	41.5796	-3.72066	0.125392	0.202508	-67.6106	57.7146	-0.65917	0.133871	0.127419	-57.4687	32.3186	-2.04842	0.144413	0.200521	-48.8912	43.2411	0.0646548	0.176346	0.158802	-27.155	28.2038	0.647813	0.128827	0.0679209	-37.1258	34.8741	0.598827	0.0875706	0.0587571	115	46	-70.1343	40.6639	-2.65194
-100.714	23.8061	-6.10934	0.0267539	0.155172	-133.515	47.4154	-11.572	0.0904558	0.313746	-89.0247	64.4982	-0.687315	0.153204	0.146945	-70.2079	39.6895	-3.80172	0.114107	0.200313	-65.2551	55.0924	-0.678605	0.128763	0.129839	-58.5172	30.5832	-2.0188	0.157197	0.200047	-49.5508	43.5273	-0.033843	0.172414	0.156382	-28.6147	28.7686	0.614302	0.115753	0.0621811	-35.8089	32.5943	0.419827	0.0788136	0.0644068	116	46.4	-69.5397	39.8297	-2.70449
-100.332	21.2018	-6.20518	0.0219976	0.153686	-130.38	47.18	-11.4975	0.0893875	0.316952	-92.4143	63.9678	-0.753861	0.151714	0.146051	-65.4091	37.8706	-3.88239	0.112539	0.203448	-62.9789	53.0472	-0.697421	0.124194	0.134946	-59.5658	29.4581	-1.98135	0.160038	0.196733	-50.2105	43.8134	-0.143305	0.173019	0.155172	-30.0744	31.6136	0.575723	0.103954	0.0612245	-34.4921	30.3145	0.244859	0.0757062	0.0731638	117	46.8	-69.1608	39.254	-2.7553
-100.448	18.5975	-6.2902	0.0181332	0.154578	-127.401	46.9446	-11.4137	0.0915242	0.318376	-96.4692	64.6322	-0.823593	0.148733	0.148733	-60.7559	36.0517	-3.96283	0.106583	0.210972	-61.1801	51.2532	-0.721816	0.119355	0.137903	-60.6143	28.51	-1.94053	0.162642	0.191998	-50.8702	44.0996	-0.254877	0.169389	0.1585	-31.5341	34.4586	0.549804	0.100128	0.0602679	-33.1752	28.7391	0.0600113	0.0824859	0.0813559	118	47.2	-69.1648	39.2839	-2.8146
-101.184	15.9932	-6.3841	0.0154578	0.152497	-125.755	46.7941	-11.3237	0.0911681	0.317664	-101.242	65.7294	-0.879043	0.149627	0.149329	-56.7332	34.2328	-4.05013	0.103135	0.217868	-59.3813	50.0057	-0.765355	0.119624	0.142473	-61.6629	27.9082	-1.91929	0.161458	0.189157	-51.5299	44.3857	-0.381155	0.163642	0.163339	-32.9938	37.7648	0.517517	0.0956633	0.0589923	-32.0012	30.7409	-0.146115	0.0855932	0.089548	119	47.6	-69.8816	40.427	-2.86631
-102.661	13.3889	-6.47435	0.0118906	0.148038	-125.466	47.0351	-11.2448	0.0943732	0.316952	-106.015	68.4588	-0.956416	0.153502	0.149031	-56.1308	36.4195	-4.12956	0.100627	0.22884	-57.5826	50.1224	-0.792528	0.117473	0.140323	-63.3842	29.4398	-1.8703	0.170218	0.190341	-52.1895	44.6718	-0.488684	0.164247	0.166667	-34.4535	41.1413	0.476699	0.0940689	0.059949	-31.0526	33.165	-0.316875	0.0884181	0.102825	120	48	-71.2001	42.3644	-2.91609
-105.383	11.9766	-6.56338	0.00862069	0.145363	-125.885	47.4114	-11.1702	0.0961538	0.318376	-110.787	72.3437	-1.03134	0.157675	0.152608	-57.989	40.6304	-4.21247	0.0981191	0.239812	-55.8692	50.6309	-0.828354	0.116398	0.140054	-65.1981	33.0612	-1.8286	0.180398	0.197206	-52.8486	44.9578	-0.574387	0.166667	0.169691	-35.9128	44.5174	0.450042	0.0927934	0.065051	-30.9278	35.7503	-0.486157	0.0912429	0.111017	121	48.4	-69.9982	40.7685	-2.90141
-104.884	10.9458	-6.52419	0.00118906	0.144174	-123.408	45.5453	-10.9996	0.0915242	0.31339	-111.682	73.8429	-1.15283	0.152906	0.151118	-56.7118	38.8879	-4.0728	0.0968652	0.23511	-54.1148	48.4075	-0.941644	0.112366	0.142473	-65.647	29.6074	-1.81736	0.168087	0.191761	-50.0078	43.0904	-0.509632	0.156685	0.162129	-33.3815	44.4211	0.371939	0.0870536	0.0644133	-30.1478	32.1686	-0.466625	0.0881356	0.107627	122	48.8	-69.2909	39.3033	-2.88718
-104.385	10.1863	-6.48248	0.000297265	0.142093	-121.626	43.6792	-10.8358	0.0840456	0.306624	-112.576	75.729	-1.29576	0.146945	0.15231	-55.4345	37.1454	-3.91795	0.0990596	0.231348	-52.3604	46.1949	-1.04386	0.107527	0.142204	-66.0959	26.539	-1.82575	0.160038	0.18821	-50.6496	41.223	-0.44344	0.154265	0.155172	-30.8502	44.3248	0.306625	0.0800383	0.0660077	-29.64	28.7078	-0.44621	0.0824859	0.0997175	123	49.2	-68.7319	38.376	-2.86803
-104.103	9.42677	-6.43791	0	0.14239	-120.264	41.8131	-10.6787	0.0779915	0.300926	-113.471	77.708	-1.43462	0.140686	0.15082	-54.4258	35.4029	-3.76747	0.0990596	0.224138	-50.643	43.9823	-1.14221	0.104839	0.14543	-66.5448	25.3075	-1.82223	0.151752	0.183712	-51.2915	39.3556	-0.359712	0.15124	0.150938	-28.7117	44.2286	0.23199	0.078125	0.0682398	-29.1321	28.1594	-0.401365	0.0799435	0.0974576	124	49.6	-68.3398	37.6876	-2.85647
-104.029	8.66728	-6.3998	0	0.140012	-118.902	40.0853	-10.5101	0.0705128	0.296652	-114.366	79.687	-1.58055	0.138003	0.150522	-53.6867	34.1301	-3.61498	0.0978056	0.22069	-49.4375	41.7697	-1.25503	0.103226	0.144086	-66.9937	25.5483	-1.79623	0.148674	0.185843	-52.2495	37.538	-0.32678	0.15124	0.148215	-26.7701	44.1323	0.158462	0.0749362	0.0688776	-28.6243	27.6305	-0.383173	0.0757062	0.0909605	125	50	-68.4859	37.4328	-2.84352
-103.955	7.90778	-6.35843	0	0.137634	-117.54	38.5886	-10.3547	0.0655271	0.291311	-115.653	81.666	-1.70037	0.130551	0.1538	-53.6851	36.0554	-3.48398	0.0984326	0.218495	-48.6099	39.557	-1.36369	0.103226	0.144086	-67.5648	25.9763	-1.80612	0.152225	0.190341	-53.5314	35.9355	-0.246862	0.149728	0.142771	-27.7179	44.1067	0.0763008	0.0720663	0.0704719	-28.1164	27.1016	-0.353893	0.070904	0.0864407	126	50.4	-69.0856	37.6149	-2.82706
-103.881	7.41714	-6.32037	0	0.134958	-117.174	37.092	-10.2023	0.0591168	0.288462	-117.397	83.645	-1.83153	0.127571	0.154993	-53.9627	38.1655	-3.31648	0.0978056	0.20721	-48.1828	37.3445	-1.46489	0.102957	0.140323	-68.3258	27.1951	-1.78923	0.151278	0.19839	-55.2198	36.2737	-0.202377	0.152148	0.136419	-30.018	44.3294	0.00395561	0.0707908	0.0746173	-27.6086	27.0716	-0.320283	0.0666667	0.0844633	127	50.8	-69.9728	38.1799	-2.80848
-104.584	7.36815	-6.28127	0	0.133175	-116.966	35.642	-10.0318	0.0551994	0.288105	-119.141	85.624	-1.99192	0.122206	0.156483	-54.6527	40.2757	-3.16336	0.0974922	0.2	-47.7606	35.1319	-1.55427	0.101075	0.141398	-69.0868	28.4138	-1.79237	0.157907	0.200994	-57.1616	39.0252	-0.115516	0.15124	0.136721	-32.3181	44.5521	-0.0631549	0.073023	0.0784439	-28.0843	27.586	-0.282618	0.0652542	0.0847458	128	51.2	-71.0084	39.4527	-2.78944
-105.311	7.9045	-6.24321	0	0.130797	-116.758	34.594	-9.87071	0.0541311	0.288105	-120.885	87.603	-2.09155	0.118331	0.157377	-55.4182	42.3858	-3.00885	0.0990596	0.194671	-47.7914	33.1448	-1.67129	0.1	0.144355	-69.8478	29.6326	-1.77682	0.163589	0.208807	-59.1034	44.1328	-0.0567989	0.15366	0.136116	-34.6182	44.7747	-0.14574	0.0742985	0.083227	-29.3421	30.9017	-0.240032	0.070339	0.0847458	129	51.6	-72.0826	40.8132	-2.77315
-106.039	8.44086	-6.19437	0	0.130797	-116.549	33.546	-9.72627	0.0559117	0.287037	-122.975	89.582	-2.21851	0.118033	0.160358	-56.1836	44.496	-2.87775	0.101567	0.193417	-47.8223	31.44	-1.77048	0.0989247	0.149194	-70.6087	30.8514	-1.76337	0.165956	0.216383	-61.0451	49.7477	0.0196932	0.155475	0.141258	-36.9183	44.9974	-0.217221	0.0787628	0.0876913	-30.6033	34.2173	-0.21005	0.0748588	0.0864407	130	52	-73.4029	42.3193	-2.75931
-106.765	9.27801	-6.15717	0	0.129905	-116.34	32.7956	-9.55786	0.0601852	0.285256	-125.444	91.5595	-2.35975	0.115946	0.162742	-56.9488	46.6056	-2.72212	0.104389	0.190282	-49.3619	30.4521	-1.85818	0.100269	0.153763	-71.3694	32.0701	-1.79674	0.171638	0.222538	-62.9861	55.3612	0.0852548	0.159407	0.145191	-39.2178	45.2197	-0.299099	0.0813138	0.0969388	-32.1925	37.532	-0.168109	0.080226	0.0841808	131	52.4	-70.4813	39.6733	-2.75698
-104.032	9.19731	-6.07305	0	0.133472	-112.701	32.173	-9.39622	0.0551994	0.287393	-118.454	82.6129	-2.577	0.113562	0.163934	-55.4275	45.0621	-2.67462	0.099373	0.18652	-47.5513	29.1446	-1.85672	0.0954301	0.148656	-69.5766	33.036	-1.78638	0.168561	0.213778	-59.0942	50.155	-0.0500571	0.143981	0.137931	-37.7472	42.569	-0.194453	0.0771684	0.0927934	-29.7485	33.1095	-0.204308	0.0669492	0.080791	132	52.8	-67.72	37.1911	-2.7506
-101.811	9.48545	-5.98592	0	0.136445	-109.314	31.5828	-9.24004	0.0562678	0.288105	-112.141	73.6663	-2.80333	0.107899	0.163338	-53.9062	43.5186	-2.61341	0.0952978	0.183072	-45.7406	27.8372	-1.84344	0.0922043	0.146505	-67.7838	34.1893	-1.77898	0.160985	0.204072	-55.2023	45.8354	-0.172045	0.135209	0.132184	-36.2765	39.9183	-0.0799184	0.0701531	0.0876913	-27.3044	28.687	-0.238349	0.0576271	0.0757062	133	53.2	-65.072	35.4527	-2.74313
-99.6878	10.0919	-5.89989	0.000297265	0.139715	-106.305	31.3273	-9.07716	0.0576923	0.286681	-106.373	64.7197	-3.01514	0.103428	0.1693	-52.3849	41.9751	-2.56161	0.0868339	0.178056	-43.93	26.5297	-1.82243	0.0873656	0.14543	-65.991	35.6019	-1.7742	0.154119	0.194129	-51.3104	44.1534	-0.273433	0.127344	0.131881	-34.8058	37.2677	0.0149602	0.0679209	0.0822704	-24.8604	27.4079	-0.279274	0.0556497	0.0686441	134	53.6	-62.6154	34.2583	-2.74568
-97.5648	10.8264	-5.80747	0.00178359	0.142093	-103.77	31.0741	-8.93103	0.0594729	0.2849	-101.853	55.8339	-3.24803	0.099851	0.176453	-50.8636	40.4316	-2.5247	0.0852665	0.173981	-42.1193	25.5637	-1.81035	0.0819892	0.144086	-64.1982	37.0701	-1.77141	0.147254	0.184422	-47.4185	42.4712	-0.421993	0.116455	0.137629	-33.3351	34.7158	0.12123	0.0695153	0.0771684	-22.4164	30.3382	-0.317388	0.0553672	0.0624294	135	54	-60.1716	33.1764	-2.74412
-95.4419	11.5676	-5.73156	0.00237812	0.145363	-101.236	30.821	-8.76822	0.0644587	0.288462	-97.332	46.9791	-3.4758	0.0968703	0.177645	-49.3424	38.8881	-2.46418	0.0811912	0.170219	-40.3087	24.6131	-1.80565	0.0771505	0.144086	-62.4053	38.7773	-1.75127	0.140152	0.182528	-43.5266	40.7891	-0.550071	0.107381	0.142468	-31.8644	32.4082	0.210785	0.0749362	0.0742985	-20.0872	33.744	-0.361121	0.0536723	0.0661017	136	54.4	-58.454	32.1605	-2.74108
-93.4053	12.4523	-5.6426	0.00475624	0.148633	-99.1308	30.5678	-8.59088	0.0655271	0.287037	-93.8181	38.1243	-3.70282	0.0941878	0.180328	-47.8211	37.3446	-2.4159	0.0777429	0.168652	-38.4981	23.6626	-1.79176	0.0736559	0.144624	-60.6125	40.5912	-1.77535	0.138258	0.185133	-39.6347	39.107	-0.669603	0.0934664	0.142771	-30.3937	30.1006	0.315836	0.0809949	0.0717474	-22.7718	37.4944	-0.396613	0.0519774	0.0793785	137	54.8	-57.2236	31.805	-2.74135
-91.9356	13.3371	-5.55805	0.00891795	0.153983	-97.4619	30.47	-8.44286	0.0698006	0.287749	-90.5563	32.3969	-3.92341	0.0921013	0.182414	-46.2998	35.8011	-2.36642	0.0742947	0.165517	-36.6874	23.9155	-1.78294	0.0747312	0.14328	-58.8197	42.4051	-1.75379	0.144176	0.18679	-35.7428	37.7017	-0.810268	0.0837871	0.141258	-31.7844	28.2173	0.4046	0.0934311	0.0723852	-25.7248	42	-0.439023	0.0553672	0.0875706	138	55.2	-56.4617	32.8209	-2.7409
-90.4659	15.313	-5.47599	0.0118906	0.155172	-95.793	30.6438	-8.28626	0.0730057	0.287749	-88.4211	36.7781	-4.15038	0.0888227	0.188077	-44.7785	34.2576	-2.31494	0.0742947	0.166458	-34.8768	24.5052	-1.77442	0.0768817	0.14328	-57.0269	44.219	-1.75247	0.148674	0.188447	-33.3842	36.5488	-0.941506	0.0862069	0.145191	-34.0881	26.5722	0.490105	0.0994898	0.0739796	-29.321	46.5506	-0.462248	0.0629944	0.0923729	139	55.6	-56.8606	34.2041	-2.7336
-88.9962	17.613	-5.38846	0.0160523	0.156064	-95.1469	30.8175	-8.13083	0.0790598	0.288105	-87.046	41.2294	-4.36959	0.076304	0.194635	-44.1656	32.7141	-2.25854	0.0777429	0.165517	-33.2006	25.0949	-1.75433	0.0849462	0.148387	-55.2341	46.0328	-1.72514	0.152225	0.190341	-35.9206	37.3481	-1.06522	0.0910466	0.150938	-36.3919	25.3667	0.602288	0.111288	0.0790816	-35.643	51.6207	-0.512574	0.0677966	0.0923729	140	56	-57.798	36.0954	-2.72524
-87.7352	19.9124	-5.30631	0.0187277	0.156064	-95.1117	31.4444	-7.96707	0.0829772	0.291311	-86.3904	45.679	-4.58312	0.0676602	0.199106	-44.9122	31.2516	-2.21003	0.0789969	0.16395	-32.9537	25.6843	-1.73946	0.0938172	0.152419	-53.4412	47.8459	-1.69174	0.160275	0.19768	-38.8348	39.4336	-1.18964	0.0992136	0.158802	-38.6947	26.8642	0.691351	0.125638	0.0867347	-42.1083	56.7427	-0.531113	0.0728814	0.0957627	141	56.4	-55.3908	34.575	-2.67523
-85.1827	18.6918	-5.17341	0.0178359	0.156064	-92.5068	31.0627	-7.84559	0.0811966	0.291311	-82.6349	40.7844	-4.62492	0.0587183	0.205067	-41.315	28.6333	-2.25086	0.0739812	0.160815	-31.8288	24.9261	-1.71495	0.0900538	0.154839	-51.3011	45.0858	-1.64557	0.153646	0.192945	-37.8177	37.626	-1.16407	0.0871143	0.149425	-35.9191	25.7148	0.756529	0.122449	0.0746173	-40.011	58.6503	-0.41418	0.070339	0.0892655	142	56.8	-53.6427	33.4253	-2.62125
-82.6303	17.4713	-5.04428	0.0178359	0.156064	-89.9019	30.681	-7.70022	0.0783476	0.289886	-78.8794	36.5055	-4.64488	0.0551416	0.207154	-40.894	26.3967	-2.27958	0.0645768	0.15674	-31.9073	24.1679	-1.69242	0.0865591	0.158065	-50.5693	42.3256	-1.57735	0.149621	0.188684	-36.8006	37.3196	-1.1696	0.0816697	0.140048	-33.1435	25.4022	0.80131	0.11352	0.0679209	-38.0584	60.5578	-0.284201	0.0666667	0.079661	143	57.2	-52.0135	32.8306	-2.56802
-80.6207	16.7231	-4.91243	0.0166468	0.152794	-87.297	30.2993	-7.552	0.0758547	0.288105	-75.3014	33.5125	-4.68936	0.0554396	0.213413	-40.4729	24.6731	-2.32624	0.0561129	0.152351	-32.0179	25.6312	-1.6658	0.0841398	0.163978	-49.9323	39.7077	-1.50251	0.147017	0.180634	-35.7835	37.0132	-1.1572	0.0804598	0.133394	-30.5904	25.4504	0.853339	0.106824	0.0634566	-36.1058	62.4654	-0.159947	0.0641243	0.0754237	144	57.6	-50.6446	33.9817	-2.50529
-78.9709	16.2005	-4.78399	0.0169441	0.150713	-84.692	29.9176	-7.39301	0.0751425	0.290954	-72.8256	40.8329	-4.70687	0.0614009	0.220268	-40.0519	23.9441	-2.34944	0.0473354	0.148276	-32.1657	27.8311	-1.63135	0.0814516	0.16586	-49.677	40.1724	-1.44525	0.14536	0.174242	-34.9179	36.7067	-1.13476	0.084997	0.127647	-28.3469	25.8567	0.931027	0.0975765	0.0580357	-34.1532	64.373	-0.0339559	0.060452	0.0669492	145	58	-50.0029	35.4994	-2.4493
-78.31	16.1065	-4.65215	0.0166468	0.149227	-82.0872	30.1348	-7.26445	0.0747863	0.292023	-70.9949	49.138	-4.71763	0.066766	0.223845	-41.1716	24.0546	-2.38981	0.0438871	0.147649	-32.3563	30.031	-1.60439	0.0817204	0.168011	-49.4216	40.6371	-1.36739	0.142992	0.172585	-37.0965	36.4003	-1.13715	0.084997	0.123109	-26.3874	26.7117	0.99207	0.083227	0.0513393	-32.2006	66.2805	0.0972443	0.059887	0.0641243	146	58.4	-49.7546	37.345	-2.40079
-78.5135	16.3615	-4.52333	0.0166468	0.147146	-79.4823	30.6505	-7.13776	0.0758547	0.290954	-69.8083	58.7181	-4.75005	0.0694486	0.225931	-43.1518	24.9945	-2.44513	0.0373041	0.145455	-32.6681	32.2309	-1.57847	0.080914	0.165323	-49.1662	41.1018	-1.31157	0.146307	0.174242	-39.3041	36.0938	-1.10827	0.0910466	0.126134	-25.0174	27.7656	1.04178	0.0758929	0.044324	-30.6795	68.1881	0.205645	0.0618644	0.0601695	147	58.8	-49.6093	39.2188	-2.3464
-78.7708	16.6844	-4.39224	0.0157551	0.144471	-76.8774	31.1663	-6.98791	0.0787037	0.288818	-69.0652	68.3299	-4.78427	0.0703428	0.228614	-45.1997	26.0886	-2.4808	0.0369906	0.14326	-32.98	34.4308	-1.54527	0.0803763	0.162903	-48.9108	41.5665	-1.25042	0.141335	0.178741	-41.5117	35.7874	-1.12068	0.0958863	0.129764	-23.6473	28.8196	1.0958	0.0778061	0.0420918	-29.5206	70.0957	0.348159	0.0675141	0.0601695	148	59.2	-49.938	41.1823	-2.29291
-79.8049	17.0438	-4.26193	0.0157551	0.141498	-74.2725	31.682	-6.85058	0.0815527	0.287749	-69.1634	77.9417	-4.81957	0.0786885	0.22772	-47.4128	27.7319	-2.51577	0.039185	0.144201	-33.2918	36.6307	-1.50747	0.0806452	0.159946	-48.6554	42.0311	-1.17415	0.144176	0.184186	-43.9827	35.4809	-1.11397	0.0989111	0.134906	-22.5787	30.0952	1.15471	0.083227	0.0430485	-30.2803	72.0032	0.452516	0.0759887	0.0621469	149	59.6	-50.6837	43.2637	-2.23794
-80.8838	17.593	-4.13261	0.0151605	0.139417	-71.6676	32.1977	-6.71551	0.082265	0.285256	-70.3061	87.5535	-4.82572	0.0837556	0.228614	-49.6258	29.8723	-2.56131	0.0423197	0.14953	-33.9558	38.8306	-1.47426	0.0822581	0.151613	-48.4	42.4958	-1.10416	0.150568	0.190341	-46.5116	35.498	-1.10236	0.101936	0.138838	-23.5684	31.4216	1.20706	0.0867347	0.0401786	-31.234	73.9108	0.567417	0.0833333	0.0629944	150	60	-52.0195	45.9718	-2.18296
-81.9621	18.1421	-4.00604	0.0154578	0.137337	-69.0627	32.7133	-6.58562	0.0833333	0.282764	-73.883	97.1613	-4.85834	0.0944858	0.232191	-51.8377	32.0119	-2.6143	0.046395	0.152665	-36.8735	41.0724	-1.4453	0.0841398	0.147312	-48.1438	43.7171	-1.026	0.15767	0.195076	-49.3209	39.8789	-1.08642	0.105263	0.147005	-24.9044	33.232	1.27379	0.0924745	0.0398597	-32.1875	75.8169	0.701638	0.0915254	0.0672316	151	60.4	-49.8827	43.4387	-2.20182
-80.3808	17.9988	-3.89079	0.0148633	0.136147	-66.6801	32.7578	-6.47445	0.0815527	0.287393	-72.4492	87.8904	-4.99673	0.085842	0.232191	-48.2988	30.7741	-2.72501	0.0394984	0.154545	-35.1356	38.6172	-1.46993	0.0798387	0.146237	-44.007	40.4351	-1.10037	0.145833	0.18608	-46.6378	38.4314	-0.983373	0.0977011	0.139141	-22.6691	33.3997	1.1948	0.0825893	0.03125	-32.6858	70.6441	0.629454	0.0861582	0.0661017	152	60.8	-48.0779	41.0542	-2.21687
-78.7994	17.8556	-3.7753	0.0154578	0.133175	-64.3724	32.8295	-6.3649	0.0801282	0.291311	-71.2965	78.6196	-5.18441	0.0813711	0.234575	-44.76	29.5363	-2.83347	0.0369906	0.159248	-33.3988	36.9871	-1.48065	0.0744624	0.146505	-42.1669	37.1531	-1.1209	0.133286	0.178977	-43.9547	36.9839	-0.874313	0.091954	0.131276	-20.4338	34.0515	1.11755	0.0742985	0.0274235	-33.5189	65.4713	0.564553	0.0799435	0.0632768	153	61.2	-46.365	38.7977	-2.23409
-77.2181	17.7124	-3.6638	0.0157551	0.131688	-62.0647	32.9011	-6.26823	0.0776353	0.291667	-70.3935	69.3487	-5.32302	0.0754098	0.239046	-41.2212	28.2985	-2.95839	0.0354232	0.161442	-31.7359	36.2551	-1.49412	0.0733871	0.147312	-40.83	34.0071	-1.17127	0.120265	0.173059	-41.2716	35.5364	-0.785128	0.0846945	0.123109	-18.1985	34.8211	1.06373	0.0685587	0.020727	-34.352	60.2985	0.493452	0.0771186	0.0629944	154	61.6	-45.0271	36.6682	-2.25302
-75.6368	17.5692	-3.54849	0.0154578	0.130202	-59.7569	32.9727	-6.15881	0.0783476	0.292023	-70.4173	60.0778	-5.50119	0.0700447	0.244113	-39.4319	27.4859	-3.07077	0.0332288	0.169906	-30.0731	35.5231	-1.49965	0.0693548	0.147849	-40.0732	31.1456	-1.22785	0.109375	0.169034	-38.6444	34.3266	-0.703478	0.0822747	0.115547	-15.9632	35.7875	0.995139	0.0628189	0.0140306	-35.2475	55.1258	0.437931	0.0759887	0.0632768	155	62	-44.6529	34.5454	-2.2695
-74.2286	17.4259	-3.43058	0.0157551	0.127527	-57.4492	33.0443	-6.04263	0.0762108	0.288105	-70.7789	50.8069	-5.64758	0.0709389	0.248882	-39.048	26.7183	-3.18885	0.0332288	0.177429	-30.1575	34.7911	-1.50514	0.0669355	0.146774	-40.0249	28.2841	-1.28822	0.10322	0.168324	-36.0456	33.1312	-0.608297	0.0780399	0.102843	-16.6833	36.7538	0.925795	0.0577168	0.0175383	-37.4598	49.953	0.359972	0.0793785	0.0624294	156	62.4	-44.8529	33.0473	-2.28701
-72.8589	17.2827	-3.31919	0.0166468	0.125149	-55.1415	33.1159	-5.94164	0.0747863	0.289886	-71.7877	44.3452	-5.81629	0.0706408	0.249776	-38.6642	25.9507	-3.30555	0.0360502	0.183072	-31.9539	34.059	-1.51855	0.0650538	0.142204	-40.2481	28.2356	-1.33586	0.107955	0.168797	-33.4469	31.9358	-0.511273	0.0771325	0.0922565	-19.7018	37.7201	0.855837	0.0554847	0.0239158	-39.8736	44.7802	0.309449	0.0830508	0.0644068	157	62.8	-45.2006	32.7027	-2.30775
-71.4893	17.1395	-3.19953	0.0175386	0.12396	-52.8338	33.1876	-5.861	0.0758547	0.287037	-72.7965	45.1501	-5.95371	0.0688525	0.249776	-38.2804	25.4589	-3.42694	0.0351097	0.188088	-33.7502	33.327	-1.52887	0.063172	0.142742	-41.1389	29.5723	-1.37914	0.110322	0.169744	-31.2588	32.1953	-0.431156	0.0798548	0.0871143	-22.7203	38.6865	0.788678	0.0538903	0.0331633	-42.5372	39.6074	0.221891	0.0881356	0.0655367	158	63.2	-46.1292	32.8061	-2.32518
-70.1197	16.9962	-3.09026	0.0184304	0.122473	-50.526	33.2592	-5.74672	0.0787037	0.287393	-75.4282	45.955	-6.12168	0.0688525	0.250373	-37.8965	25.2507	-3.53767	0.0382445	0.19373	-35.5466	32.595	-1.54862	0.061828	0.142204	-42.0296	31.0228	-1.43239	0.118371	0.178504	-32.6764	35.8653	-0.330272	0.0819722	0.0895342	-25.7388	39.8758	0.715144	0.0580357	0.044324	-45.2008	34.4346	0.165859	0.0926554	0.0683616	159	63.6	-47.3542	33.3718	-2.34092
-68.75	16.853	-2.97773	0.0208086	0.122176	-48.2749	33.3308	-5.65476	0.0808405	0.287749	-79.3059	46.76	-6.26615	0.0661699	0.250969	-38.6485	25.0425	-3.66291	0.0410658	0.196552	-37.3429	31.863	-1.56799	0.0626344	0.141398	-42.963	32.7861	-1.47397	0.130208	0.18679	-34.2807	39.7475	-0.236661	0.0831821	0.0922565	-28.7572	41.237	0.648346	0.0647321	0.0554847	-47.8644	32.7261	0.123552	0.100282	0.070904	160	64	-48.8062	34.5448	-2.36195
-67.3804	16.7125	-2.8569	0.0240785	0.121581	-46.1459	33.4024	-5.55014	0.0811966	0.28312	-83.1818	47.5645	-6.4257	0.0643815	0.24769	-40.911	25.1362	-3.79311	0.0410658	0.2	-39.1383	32.7607	-1.58646	0.0674731	0.143548	-44.0101	34.5482	-1.52054	0.138968	0.195312	-36.1876	43.9697	-0.158606	0.0901391	0.0977011	-31.7745	42.5975	0.575486	0.073023	0.0625	-50.5265	34.2115	0.0584405	0.104802	0.0731638	161	64.4	-47.0619	33.5058	-2.32271
-65.8234	16.2296	-2.80943	0.0193222	0.121581	-47.6392	33.349	-5.4193	0.0829772	0.276709	-79.8712	46.5795	-6.31371	0.0533532	0.245007	-39.6654	25.7418	-3.69813	0.0376176	0.194044	-36.9778	31.4314	-1.59414	0.0596774	0.139247	-42.2434	31.253	-1.5403	0.127367	0.185369	-34.3445	42.9194	-0.234676	0.0819722	0.0916515	-30.0336	41.0423	0.59737	0.0685587	0.0605867	-46.9583	33.0061	0.107917	0.100282	0.070339	162	64.8	-45.6361	32.54	-2.28112
-64.2666	15.7495	-2.77033	0.014566	0.12069	-49.289	33.2955	-5.29147	0.0790598	0.268875	-77.912	45.5946	-6.19862	0.0453055	0.242027	-38.4198	26.3475	-3.61234	0.0369906	0.189342	-34.8174	30.102	-1.59005	0.0526882	0.133602	-40.9746	28.6141	-1.54106	0.117424	0.176373	-32.7045	41.869	-0.301323	0.0719903	0.0913491	-28.2927	39.4871	0.625331	0.0701531	0.0596301	-44.0481	31.8008	0.149803	0.0997175	0.0680791	163	65.2	-44.6782	31.8283	-2.246
-62.7097	15.2694	-2.71565	0.00921522	0.120095	-50.9388	33.242	-5.16322	0.076567	0.259615	-77.4592	44.6097	-6.0781	0.0432191	0.240835	-37.1742	26.9532	-3.52525	0.0344828	0.189969	-32.6569	29.4616	-1.59759	0.0497312	0.127688	-39.7068	27.5726	-1.59238	0.107718	0.166667	-31.3012	40.8187	-0.384715	0.0665457	0.0901391	-27.0923	37.9319	0.640819	0.073023	0.0545281	-43.0644	30.5954	0.202122	0.0980226	0.0638418	164	65.6	-43.8817	31.3016	-2.20666
-61.1886	14.7941	-2.66769	0.00772889	0.118312	-52.5886	33.1886	-5.03045	0.0698006	0.256054	-78.174	43.6247	-5.96742	0.0438152	0.239046	-36.1198	27.9428	-3.44011	0.0357367	0.190282	-30.4965	28.9052	-1.59835	0.0454301	0.125806	-38.439	27.6587	-1.58759	0.101326	0.161458	-29.898	39.8338	-0.474942	0.0583787	0.0871143	-25.9504	36.3767	0.663832	0.0736607	0.0516582	-42.0807	29.3901	0.242799	0.0968927	0.0629944	165	66	-43.9548	30.8913	-2.16703
-59.7783	14.431	-2.61656	0.0059453	0.115339	-54.3772	33.1351	-4.9057	0.0644587	0.252137	-80.1044	42.6398	-5.83887	0.0456036	0.234873	-36.0291	29.1451	-3.33223	0.0360502	0.191536	-28.3794	28.3487	-1.61541	0.0424731	0.124731	-37.1713	28.2172	-1.60405	0.0975379	0.152699	-33.0011	39.0988	-0.544429	0.0565638	0.0880218	-25.6556	34.8214	0.669249	0.0711097	0.046875	-41.097	28.1847	0.284739	0.0929379	0.059887	166	66.4	-44.993	30.837	-2.12769
-58.368	14.068	-2.56955	0.00535077	0.113555	-56.4307	33.0817	-4.77125	0.0673077	0.248219	-82.2507	41.6549	-5.73209	0.0467958	0.231297	-35.9383	30.3474	-3.23791	0.0416928	0.19279	-30.1083	27.7923	-1.60962	0.0397849	0.122312	-36.5617	28.9945	-1.62623	0.0977746	0.153172	-38.9179	38.3639	-0.61497	0.0586812	0.0913491	-26.2479	33.2662	0.680454	0.0707908	0.0411352	-40.1133	29.9644	0.331985	0.0881356	0.0632768	167	66.8	-46.4632	30.9681	-2.08825
-56.9578	13.7049	-2.52012	0.00564804	0.11088	-58.5699	33.0282	-4.65701	0.0712251	0.239316	-84.397	40.67	-5.60159	0.052459	0.227124	-35.8476	31.5497	-3.15218	0.0482759	0.19373	-32.6329	27.2358	-1.60997	0.0395161	0.123118	-38.4102	30.0404	-1.64576	0.0991951	0.161458	-44.8346	37.6289	-0.697082	0.0620085	0.0946763	-27.3892	31.711	0.709261	0.0746173	0.0433673	-39.1295	33.144	0.380222	0.0836158	0.0621469	168	67.2	-48.1499	31.2185	-2.04685
-55.5475	13.3419	-2.47108	0.00505351	0.106421	-61.0174	32.9748	-4.51646	0.0751425	0.233974	-86.5433	39.685	-5.48116	0.0590164	0.223845	-36.3049	33.4405	-3.05548	0.0570533	0.197179	-35.1574	27.0647	-1.61332	0.0395161	0.123387	-40.2587	31.0863	-1.67279	0.10322	0.174006	-50.7514	36.894	-0.782222	0.0683606	0.101633	-29.4838	30.1558	0.733767	0.0774872	0.0436862	-38.2845	36.3237	0.43706	0.079661	0.0638418	169	67.6	-50.0205	31.7168	-2.00422
-54.1373	12.9788	-2.42099	0.0059453	0.103151	-63.4648	32.9213	-4.38072	0.0808405	0.224359	-88.6896	38.7001	-5.36149	0.0646796	0.225931	-38.1233	35.3654	-2.97187	0.0633229	0.197806	-37.6819	26.9341	-1.61794	0.0403226	0.122849	-42.1072	32.1322	-1.66969	0.10535	0.181345	-56.6681	36.1591	-0.855484	0.069873	0.104356	-31.5784	30.1266	0.753537	0.0825893	0.044324	-37.734	40.134	0.486717	0.0816384	0.0632768	170	68	-51.8901	32.7173	-1.96766
-52.7272	12.8831	-2.37666	0.00624257	0.100178	-65.9113	32.8672	-4.24905	0.0893875	0.219017	-90.8343	37.7149	-5.23434	0.0736215	0.225335	-39.9411	38.0368	-2.88996	0.0689655	0.20094	-40.2057	26.8031	-1.63703	0.0435484	0.124462	-43.9542	34.6804	-1.68617	0.113873	0.190341	-62.5826	35.4228	-0.934724	0.0747126	0.109195	-33.6722	32.0224	0.770635	0.088648	0.0455995	-37.1825	44.0247	0.528348	0.0822034	0.0624294	171	68.4	-50.0691	30.7177	-1.95443
-51.9844	12.2134	-2.41986	0.00475624	0.103448	-65.0222	30.5176	-4.273	0.0829772	0.206553	-87.3204	35.7315	-5.02822	0.0640835	0.214605	-39.8021	35.612	-2.84989	0.060815	0.194357	-39.9665	25.4013	-1.65614	0.0373656	0.120699	-40.3656	33.3434	-1.62418	0.107244	0.181108	-60.4502	33.4118	-0.946557	0.0716878	0.101028	-32.9951	29.3728	0.746963	0.083227	0.0449617	-32.7154	40.8557	0.461004	0.0765537	0.059322	172	68.8	-48.2684	29.2525	-1.94036
-51.2416	11.5437	-2.46752	0.00356718	0.106124	-64.1331	29.6273	-4.28957	0.079416	0.198362	-83.8065	33.7482	-4.78321	0.05693	0.205365	-39.6632	33.1871	-2.82835	0.0520376	0.188715	-39.7273	23.9994	-1.68264	0.0370968	0.116398	-36.7771	33.7698	-1.57961	0.10393	0.175426	-58.3177	32.6386	-0.96601	0.0683606	0.0989111	-32.5007	26.7231	0.730483	0.0778061	0.0449617	-28.2483	38.0353	0.403149	0.0689266	0.0573446	173	69.2	-46.7724	27.9391	-1.93031
-50.4989	10.874	-2.51661	0.00208086	0.108799	-63.244	29.6964	-4.30422	0.0754986	0.200142	-80.2926	31.773	-4.55238	0.0497765	0.199106	-39.5242	30.8644	-2.80722	0.0435737	0.175862	-39.4881	22.674	-1.70715	0.038172	0.115323	-33.2251	34.1962	-1.51389	0.0970644	0.174479	-56.1853	31.8654	-0.989495	0.0653358	0.100423	-32.5447	24.1746	0.691145	0.0762117	0.0452806	-25.9483	35.334	0.327008	0.0621469	0.0556497	174	69.6	-45.6547	27.2928	-1.91539
-49.7561	10.2043	-2.56099	0.000297265	0.110285	-62.3549	29.7654	-4.31811	0.0715812	0.195869	-76.9213	30.1483	-4.32936	0.0438152	0.191356	-39.3853	28.6673	-2.77028	0.0366771	0.165831	-39.5765	23.6702	-1.73629	0.0395161	0.112634	-30.4114	35.2642	-1.47157	0.0909091	0.174716	-54.0529	31.1793	-0.994564	0.0638234	0.103751	-33.1725	24.1035	0.667369	0.0768495	0.0440051	-25.2616	32.6326	0.275255	0.0610169	0.0548023	175	70	-44.8056	26.815	-1.90694
-49.0133	9.53464	-2.61085	0	0.113258	-61.4779	29.8345	-4.33466	0.0658832	0.194088	-73.7091	28.5236	-4.09058	0.0402385	0.182116	-39.2463	26.4701	-2.76108	0.0347962	0.155172	-39.7519	25.3352	-1.76985	0.0403226	0.110753	-28.9847	36.5741	-1.4188	0.0878314	0.175663	-51.9205	30.666	-1.02279	0.0635209	0.107985	-34.0712	24.0324	0.639999	0.0752551	0.0446429	-25.0754	30.3642	0.20618	0.059887	0.0587571	176	70.4	-44.3139	26.3803	-1.89703
-48.4091	8.86496	-2.65522	0	0.114744	-60.813	29.9035	-4.35638	0.0623219	0.194444	-70.4968	26.8989	-3.8696	0.0435171	0.176155	-39.4657	24.3814	-2.73059	0.0322884	0.149843	-39.9481	27.0002	-1.79181	0.0395161	0.111022	-29.7569	37.8839	-1.3702	0.0859375	0.171165	-49.7881	30.1527	-1.06316	0.0716878	0.114943	-35.258	24.094	0.627501	0.0752551	0.0449617	-24.8892	28.2429	0.136189	0.0562147	0.0579096	177	70.8	-44.1199	26.5116	-1.88625
-48.1124	8.19527	-2.69969	0	0.117122	-60.1481	29.9725	-4.37089	0.0587607	0.194444	-68.0041	25.6036	-3.65846	0.0467958	0.175559	-39.7837	22.3406	-2.69867	0.0297806	0.144828	-40.1443	28.6652	-1.81452	0.0416667	0.109677	-31.2836	39.4565	-1.32212	0.0871212	0.169508	-47.7582	30.5057	-1.09147	0.0798548	0.12069	-37.0273	27.042	0.604938	0.0758929	0.044324	-24.8172	26.8233	0.0746158	0.0596045	0.059887	178	71.2	-44.2939	27.5137	-1.87745
-47.8158	8.67733	-2.74922	0	0.120095	-59.4832	30.0416	-4.38614	0.0559117	0.201211	-66.7577	25.6581	-3.43645	0.0494784	0.173174	-40.2037	20.4061	-2.67577	0.0263323	0.142006	-40.3405	30.3301	-1.85204	0.0435484	0.112634	-33.7157	41.2588	-1.27211	0.0961174	0.170691	-46.1185	31.4405	-1.10043	0.0874168	0.127949	-39.0774	29.99	0.567301	0.0800383	0.0465561	-25.1327	29.821	0.00780692	0.059887	0.0680791	179	71.6	-44.7353	28.9354	-1.86814
-47.5191	9.39678	-2.79444	0	0.121879	-59.0143	30.1106	-4.39662	0.0516382	0.209046	-65.7576	28.8792	-3.21023	0.0575261	0.173472	-41.0847	18.5833	-2.65151	0.0316614	0.136677	-40.6943	31.9951	-1.88489	0.0467742	0.11586	-36.1477	43.0611	-1.23394	0.103693	0.172585	-44.4789	32.3753	-1.11245	0.092559	0.133999	-41.5799	33.1025	0.541218	0.0835459	0.0475128	-26.341	32.9142	-0.0704084	0.0661017	0.0723164	180	72	-45.991	30.544	-1.85615
-47.3555	10.1158	-2.84021	0.000297265	0.124257	-58.5719	30.1787	-4.41874	0.0491453	0.218305	-64.9826	32.0991	-2.98722	0.0691505	0.169896	-42.5441	18.06	-2.61582	0.0332288	0.134169	-42.886	34.0481	-1.91495	0.0481183	0.119355	-38.6279	44.8617	-1.1766	0.109848	0.174716	-44.9657	33.3084	-1.14069	0.0986086	0.140048	-44.3093	36.2191	0.506853	0.0908801	0.0516582	-29.6757	36.0054	-0.117981	0.070339	0.0745763	181	72.4	-43.5998	28.4064	-1.83381
-45.953	9.60286	-2.82747	0	0.124257	-56.9815	27.4033	-4.41688	0.0487892	0.223291	-58.4623	32.1643	-2.92196	0.0697466	0.174963	-41.0973	17.6607	-2.58265	0.0294671	0.129467	-39.3394	32.6919	-1.79007	0.0481183	0.116398	-38.8049	41.1083	-1.13832	0.0975379	0.165009	-41.8094	28.9715	-1.15461	0.0952813	0.135814	-40.3411	32.7719	0.499526	0.0860969	0.0491071	-29.6089	33.2833	-0.171868	0.0607345	0.0737288	182	72.8	-41.3896	26.563	-1.81499
-44.6839	9.0899	-2.81719	0	0.125149	-55.438	24.6279	-4.42231	0.0466524	0.22792	-52.6533	32.3179	-2.8777	0.071237	0.176751	-39.7102	17.3031	-2.54763	0.0272727	0.1279	-35.9494	31.3358	-1.67908	0.0465054	0.116129	-39.0135	37.3549	-1.09895	0.0913826	0.149858	-39.1426	27.1513	-1.14964	0.0852995	0.131276	-36.373	29.3247	0.493455	0.0835459	0.0462372	-29.5421	30.5611	-0.235889	0.0533898	0.0694915	183	73.2	-39.5737	25.5794	-1.79522
-43.9479	8.68115	-2.8088	0	0.124851	-54.085	21.9651	-4.41546	0.0462963	0.233262	-48.0389	32.7594	-2.83314	0.0724292	0.176751	-38.5652	17.0795	-2.51013	0.0260188	0.122257	-33.3883	29.9797	-1.56459	0.0454301	0.114516	-39.4221	34.2702	-1.049	0.0890152	0.145833	-36.4757	28.786	-1.17254	0.0783424	0.129764	-32.4048	25.8774	0.488814	0.0787628	0.0449617	-29.8357	30.8159	-0.292134	0.0449153	0.0675141	184	73.6	-38.156	25.0809	-1.77629
-43.3218	8.28201	-2.79925	0	0.12604	-52.828	19.4266	-4.41893	0.0434473	0.234687	-44.8359	33.244	-2.78156	0.0751118	0.175559	-37.4749	16.8558	-2.47489	0.0269592	0.120063	-30.8273	28.6236	-1.44215	0.0432796	0.11371	-39.8307	31.45	-1.00792	0.0875947	0.14465	-35.4613	31.8342	-1.19	0.0689655	0.124622	-28.4366	24.617	0.476706	0.0749362	0.0475128	-30.3872	31.3952	-0.348573	0.0429379	0.0655367	185	74	-37.2918	25.2245	-1.76186
-42.6957	7.88287	-2.78713	0	0.127229	-51.6674	20.1464	-4.42887	0.0430912	0.232906	-43.0299	33.7287	-2.76722	0.0766021	0.174665	-36.4449	16.6321	-2.44028	0.0294671	0.12884	-28.2662	27.2675	-1.31246	0.0430108	0.111559	-40.2393	29.8435	-0.964054	0.0961174	0.147254	-37.8098	35.5565	-1.2189	0.0620085	0.124017	-24.4684	23.9882	0.46004	0.0707908	0.0497449	-31.0047	31.9745	-0.397842	0.0426554	0.0638418	186	74.4	-37.5454	26.4794	-1.7405
-42.4316	7.69131	-2.78135	0	0.128419	-50.5068	22.2998	-4.42785	0.042735	0.242877	-49.9402	34.2133	-2.70788	0.0789866	0.1693	-35.5864	16.4084	-2.40637	0.0316614	0.136991	-25.9698	27.8521	-1.19304	0.0473118	0.112097	-40.6479	34.3631	-0.921309	0.103456	0.148911	-40.1583	39.5733	-1.23088	0.0595886	0.1219	-20.5003	23.3594	0.45369	0.0672832	0.0487883	-32.1675	32.5538	-0.449549	0.0451977	0.0683616	187	74.8	-39.0594	28.052	-1.72301
-42.3184	7.9519	-2.77174	0	0.129013	-49.4189	24.4532	-4.43317	0.042735	0.245014	-56.9281	34.9021	-2.67571	0.0813711	0.164531	-34.7279	16.259	-2.36308	0.0382445	0.142947	-27.4125	29.3064	-1.07989	0.0508065	0.112097	-41.2074	38.8827	-0.892998	0.114583	0.15625	-42.5068	43.59	-1.22438	0.0635209	0.120387	-23.6847	23.9901	0.443448	0.065051	0.0455995	-33.3304	33.1331	-0.509595	0.0468927	0.0711864	188	75.2	-41.0916	29.9621	-1.70184
-42.2051	8.21248	-2.76164	0	0.129905	-48.4122	26.6066	-4.42589	0.0466524	0.253561	-64.0592	35.6199	-2.62143	0.0831595	0.162742	-33.8694	17.7597	-2.3404	0.0451411	0.146708	-29.037	30.7606	-0.961553	0.0543011	0.112366	-45.3935	43.4023	-0.851396	0.132576	0.167377	-44.9969	47.6067	-1.24315	0.0659407	0.121295	-27.1325	25.9785	0.449851	0.0602679	0.0379464	-34.7188	33.7124	-0.560921	0.0485876	0.0810734	189	75.6	-43.1895	31.9632	-1.67817
-42.0919	8.47307	-2.75382	0	0.129905	-47.4054	28.7599	-4.43384	0.0477208	0.255698	-71.1903	36.4156	-2.57808	0.0879285	0.163934	-33.0676	19.7275	-2.28756	0.0532915	0.152351	-30.6615	32.4886	-0.832097	0.0591398	0.10914	-49.5796	47.9219	-0.803512	0.149148	0.176847	-47.7113	51.6234	-1.23862	0.0695705	0.125529	-30.641	27.9668	0.433811	0.0625	0.033801	-36.3572	34.2917	-0.60983	0.0536723	0.0878531	190	76	-45.3191	34.2905	-1.65598
-42.1758	8.73349	-2.74755	0	0.129905	-46.3993	30.9122	-4.42455	0.0487892	0.256054	-78.3186	39.8215	-2.52373	0.0929955	0.165127	-32.3115	21.6927	-2.24501	0.0595611	0.158307	-32.2846	34.3987	-0.720223	0.0637097	0.102957	-53.7628	52.4385	-0.766663	0.164062	0.183002	-50.4239	55.7958	-1.23901	0.0747126	0.134301	-34.2017	29.953	0.425043	0.0640944	0.0325255	-37.9936	34.8687	-0.662083	0.0584746	0.0943503	191	76.4	-43.824	31.8286	-1.6406
-41.2788	8.55491	-2.6984	0	0.128419	-46.923	30.0239	-4.35516	0.0537749	0.260684	-77.7091	39.4357	-2.4917	0.0921013	0.162742	-31.0923	21.6292	-2.25282	0.0520376	0.158934	-30.3139	32.6079	-0.674364	0.0596774	0.0943548	-49.951	48.5684	-0.712122	0.159328	0.173769	-48.1901	50.7866	-1.27129	0.0704779	0.126739	-35.1278	25.8665	0.405764	0.0640944	0.033801	-33.83	28.9845	-0.715275	0.0528249	0.0912429	192	76.8	-42.7617	30.2633	-1.62662
-40.5792	8.37632	-2.65359	0	0.128121	-47.4468	29.1357	-4.28532	0.0587607	0.269587	-77.1359	39.0499	-2.48927	0.0900149	0.159165	-33.2604	22.2874	-2.25189	0.0517241	0.158621	-28.6171	30.9225	-0.638185	0.0532258	0.0846774	-46.1392	44.6984	-0.643474	0.152225	0.165246	-45.9563	45.7773	-1.3102	0.0683606	0.122505	-36.0539	26.9555	0.396341	0.0653699	0.0331633	-29.6665	25.1667	-0.763986	0.0477401	0.0864407	193	77.2	-42.1844	29.143	-1.6057
-39.8795	8.21606	-2.60995	0	0.127824	-47.9705	28.2474	-4.21786	0.0630342	0.269943	-76.9144	38.7075	-2.46267	0.0926975	0.159762	-35.5184	22.9456	-2.23791	0.0554859	0.163636	-26.9202	29.2539	-0.589977	0.0443548	0.0774194	-45.571	40.8283	-0.567926	0.14607	0.159801	-43.7225	40.768	-1.34616	0.0662432	0.120387	-37.0324	30.319	0.38795	0.067602	0.0382653	-26.1308	23.0015	-0.806788	0.0403955	0.0785311	194	77.6	-41.8853	28.3223	-1.58871
-39.1799	8.72972	-2.56374	0	0.126338	-48.4943	27.3591	-4.15218	0.0669516	0.276353	-76.6929	38.7173	-2.43159	0.0938897	0.16006	-37.8572	23.6038	-2.23632	0.0595611	0.167398	-25.2234	27.9243	-0.547081	0.041129	0.0672043	-45.1823	36.9583	-0.51104	0.13518	0.145597	-41.4886	36.9395	-1.38844	0.061101	0.117362	-38.0341	33.6826	0.377132	0.0691964	0.0430485	-24.8151	20.9862	-0.845158	0.029661	0.0686441	195	78	-41.8873	27.9657	-1.56528
-38.4802	9.34802	-2.51416	0	0.125149	-49.0578	26.4708	-4.06287	0.0722934	0.275285	-76.4713	39.0083	-2.40104	0.0971684	0.158271	-40.1961	25.2523	-2.23304	0.0645768	0.169279	-23.5265	26.9379	-0.500877	0.0403226	0.0569892	-44.7936	33.1701	-0.435033	0.130682	0.141809	-41.9251	35.3713	-1.42976	0.0559589	0.11585	-39.0358	37.0461	0.368943	0.0797194	0.0475128	-23.4993	19.0866	-0.879664	0.0220339	0.0618644	196	78.4	-41.9173	28.9249	-1.54147
-37.8184	9.96633	-2.46513	0	0.124257	-49.6963	27.7394	-3.98827	0.0776353	0.274929	-76.2498	39.4779	-2.37853	0.101937	0.158271	-42.5349	27.0544	-2.23401	0.0677116	0.171473	-21.8296	29.4731	-0.442116	0.0422043	0.0548387	-44.4049	33.7241	-0.353278	0.126894	0.14607	-42.501	35.292	-1.45228	0.054144	0.116757	-40.0375	40.4096	0.360626	0.0838648	0.0535714	-22.1835	17.1871	-0.920227	0.0161017	0.0573446	197	78.8	-42.3604	30.7827	-1.52045
-37.5273	10.5846	-2.41884	0.00118906	0.125149	-50.3349	30.5792	-3.9194	0.0833333	0.276709	-76.109	40.1263	-2.34496	0.105812	0.159762	-44.8738	30.7121	-2.22866	0.0721003	0.173041	-23.3991	32.0771	-0.40944	0.0456989	0.0518817	-44.0162	37.3535	-0.279118	0.132339	0.147491	-43.0768	36.071	-1.47538	0.0538415	0.1219	-41.0392	43.7731	0.34735	0.0860969	0.0583546	-20.8677	15.7671	-0.955627	0.0132768	0.0590395	198	79.2	-43.3503	32.8329	-1.50732
-37.2362	11.2029	-2.38112	0.00118906	0.123662	-50.9734	33.5144	-3.85826	0.0883191	0.277066	-76.3492	41.3959	-2.31464	0.110581	0.16006	-47.2162	34.4026	-2.2421	0.0789969	0.170533	-25.3698	34.8598	-0.37348	0.0497312	0.0508065	-45.0182	40.9828	-0.207429	0.144176	0.149621	-43.6526	37.2465	-1.51222	0.0544465	0.127949	-42.0409	47.1367	0.32755	0.0892857	0.0628189	-22.2959	14.7545	-1.00415	0.0112994	0.0638418	199	79.6	-44.6757	34.9292	-1.4912
-36.945	11.8212	-2.33394	0.00326992	0.122771	-51.6119	36.6921	-3.77815	0.09651	0.279558	-76.5895	42.6656	-2.28904	0.112966	0.162444	-50.5149	38.0931	-2.24803	0.0852665	0.167398	-27.3405	37.6425	-0.341535	0.0526882	0.0491935	-47.198	44.6121	-0.142167	0.150568	0.153172	-44.2285	38.422	-1.55867	0.0553539	0.132184	-43.0426	50.5002	0.315516	0.0947066	0.0666454	-24.6106	13.9139	-1.04481	0.00875706	0.0711864	200	80	-46.0981	37.1329	-1.47623
-37.1213	12.9266	-2.29392	0.00653983	0.123068	-52.2495	39.8862	-3.70179	0.10114	0.278846	-76.8295	43.934	-2.26542	0.114754	0.163636	-53.8111	41.7805	-2.2317	0.0943574	0.169279	-29.3097	40.4223	-0.299718	0.055914	0.052957	-49.375	48.2387	-0.085541	0.159091	0.160275	-44.8032	39.5955	-1.60806	0.0577737	0.137931	-44.1904	53.8602	0.286956	0.0978954	0.0704719	-27.1933	13.5522	-1.0869	0.0124294	0.0771186	201	80.4	-44.6664	34.2479	-1.45978
-37.1405	11.3725	-2.24474	0.00267539	0.118014	-50.4334	38.652	-3.63232	0.0947293	0.270655	-76.536	42.3829	-2.09347	0.117735	0.158569	-51.2386	37.9056	-2.19734	0.0827586	0.164577	-27.5586	35.8558	-0.329655	0.0526882	0.0534946	-44.6775	45.1122	-0.163235	0.152699	0.160511	-42.9664	35.98	-1.61001	0.0544465	0.134604	-42.2094	48.5189	0.137657	0.091199	0.0711097	-29.2375	12.4513	-1.00494	0.00932203	0.0717514	202	80.8	-43.2913	32.1503	-1.44453
-37.1598	10.3011	-2.21	0.00118906	0.110583	-48.6173	37.4177	-3.56345	0.0890313	0.263533	-76.2424	42.4231	-1.90997	0.116542	0.157973	-48.6662	35.249	-2.16297	0.0724138	0.157994	-25.8074	31.2894	-0.361938	0.0505376	0.0591398	-39.9799	42.6124	-0.26803	0.148438	0.163116	-41.1749	32.3644	-1.59812	0.0499093	0.132789	-40.6922	43.1775	0.00130275	0.0784439	0.0704719	-31.2818	14.5178	-0.927612	0.0121469	0.0635593	203	81.2	-41.9436	30.6762	-1.43335
-37.1791	10.5222	-2.16569	0.000891795	0.0992866	-46.8011	36.1988	-3.48796	0.0865385	0.25641	-75.9489	42.4634	-1.73141	0.119225	0.153204	-46.1429	33.1538	-2.12004	0.0658307	0.153918	-24.0976	27.3027	-0.409183	0.0465054	0.0688172	-35.2824	42.3911	-0.379761	0.145833	0.165483	-39.4065	29.425	-1.60304	0.0483969	0.131276	-39.3075	37.8362	-0.151916	0.0640944	0.0685587	-33.326	16.7928	-0.851142	0.0175141	0.0579096	204	81.6	-41.1553	30.2514	-1.41683
-37.1984	11.5567	-2.12841	0.00326992	0.0948276	-44.985	35.3276	-3.42048	0.0804843	0.248932	-75.6554	42.5036	-1.55203	0.121311	0.151416	-43.8211	31.0586	-2.09252	0.0579937	0.147022	-23.2389	26.2875	-0.437601	0.0483871	0.0755376	-34.2068	43.4235	-0.464083	0.139205	0.168561	-37.9993	29.9874	-1.5879	0.045977	0.128554	-37.9228	32.4948	-0.298739	0.059949	0.0688776	-35.3702	19.623	-0.769759	0.0268362	0.050565	205	82	-40.9162	30.1242	-1.40031
-37.3308	12.6189	-2.08862	0.00445898	0.088585	-43.2272	34.4565	-3.34193	0.0776353	0.239672	-75.3618	42.7467	-1.37508	0.122206	0.147243	-41.4994	29.1187	-2.05229	0.0564263	0.141379	-24.7514	26.7827	-0.479101	0.05	0.0822581	-35.4621	44.8133	-0.555826	0.138021	0.175189	-36.5922	30.5497	-1.58122	0.0480944	0.128857	-36.6064	27.1535	-0.435345	0.0529337	0.067602	-37.4145	22.8778	-0.693326	0.0336158	0.0576271	206	82.4	-40.7546	30.2142	-1.38651
-37.6718	13.7531	-2.0328	0.00535077	0.0865042	-41.5454	33.5853	-3.27426	0.0733618	0.227208	-75.0683	43.4318	-1.18308	0.126975	0.144858	-39.2126	27.8218	-2.01226	0.0551724	0.137931	-26.2639	27.2779	-0.528351	0.0508065	0.0865591	-36.9841	46.2031	-0.676041	0.136364	0.180871	-35.1851	31.3988	-1.56598	0.0477919	0.125832	-35.4016	22.2519	-0.586683	0.0471939	0.0660077	-39.4587	26.204	-0.619155	0.0474576	0.0683616	207	82.8	-40.6595	31.0508	-1.37012
-38.2482	14.8872	-1.99121	0.00713436	0.0817479	-39.8637	32.7141	-3.20762	0.0712251	0.220085	-74.7747	44.8775	-1.00145	0.131744	0.143964	-37.1073	26.6907	-1.97699	0.0529781	0.133542	-27.7764	27.7731	-0.562585	0.0551075	0.0908602	-38.688	47.593	-0.764371	0.138494	0.184422	-33.778	32.807	-1.56464	0.0483969	0.129159	-34.1967	22.5842	-0.721437	0.0440051	0.0637755	-41.5029	29.5303	-0.540753	0.0584746	0.0768362	208	83.2	-40.9501	32.1078	-1.36304
-39.2895	16.0214	-1.95019	0.00802616	0.0805589	-38.1819	31.843	-3.1392	0.0683761	0.216168	-74.4812	47.1395	-0.816315	0.13532	0.143368	-36.1837	25.5596	-1.96467	0.0501567	0.13605	-29.2888	28.2906	-0.608765	0.0586022	0.0967742	-40.7698	49.2161	-0.880122	0.141572	0.190578	-32.7922	35.0664	-1.567	0.0493043	0.131276	-34.0169	22.9164	-0.872115	0.0382653	0.067602	-43.5471	32.9177	-0.46895	0.0629944	0.0833333	209	83.6	-41.532	34.0662	-1.35073
-40.3308	17.1555	-1.91421	0.00832342	0.0793698	-36.5002	31.2212	-3.06568	0.0698006	0.218305	-74.1877	49.4016	-0.63796	0.138003	0.142176	-36.2422	25.1154	-1.90991	0.0523511	0.138871	-30.8013	32.1061	-0.649968	0.0623656	0.102151	-43.2476	51.5165	-0.99128	0.146544	0.198153	-31.9489	39.1735	-1.57255	0.0508167	0.136419	-34.9379	23.2486	-1.01974	0.0353954	0.0704719	-45.5914	37.6573	-0.39529	0.0675141	0.0881356	210	84	-37.2669	31.7338	-1.301
-41.3707	18.2884	-1.87473	0.010107	0.0790725	-34.8183	30.718	-2.99243	0.0701567	0.224715	-73.8924	52.8145	-0.452226	0.144262	0.140984	-36.5309	25.2273	-1.86719	0.0554859	0.138245	-32.3124	35.9418	-0.699063	0.0655914	0.105376	-45.7238	55.6447	-1.08102	0.154119	0.204309	-34.676	43.3883	-1.55701	0.0550514	0.142468	-36.0777	23.5806	-1.18536	0.0366709	0.0778061	0	0	0	0	0	211	84.4	-35.6043	29.4278	-1.28189
-39.1326	16.6368	-1.87407	0.00832342	0.0781807	-32.8041	27.9756	-3.00423	0.0669516	0.217593	-69.7645	48.0023	-0.475034	0.139791	0.138301	-37.1218	25.1558	-1.81948	0.0548589	0.134796	-30.6583	33.0464	-0.614756	0.0615591	0.101882	-44.453	51.2903	-1.07521	0.143229	0.194839	-32.422	39.3338	-1.5726	0.0493043	0.134906	-34.0826	23.4091	-1.10164	0.0331633	0.0717474	0	0	0	0	0	212	84.8	-34.364	27.3769	-1.25237
-36.8944	14.9853	-1.87471	0.00772889	0.0772889	-30.7899	25.2332	-3.00917	0.0623219	0.215456	-66.4805	43.4573	-0.484154	0.137109	0.134128	-37.7128	25.2831	-1.77497	0.0561129	0.131975	-31.0633	30.151	-0.520631	0.0583333	0.0973118	-43.9189	48.7657	-1.03781	0.127604	0.187027	-30.203	35.2794	-1.56811	0.0453721	0.128554	-32.2131	23.2375	-1.00173	0.0318878	0.067602	0	0	0	0	0	213	85.2	-33.5228	25.7483	-1.22674
-34.8314	13.3337	-1.88072	0.00535077	0.0763971	-28.7757	22.4908	-3.01597	0.0605413	0.214387	-63.1965	40.9761	-0.497786	0.13532	0.129359	-38.3038	25.6403	-1.71479	0.0573668	0.129781	-31.89	28.4161	-0.434884	0.0545699	0.0916667	-43.3848	46.2411	-1.014	0.120975	0.176373	-30.9323	31.5711	-1.57835	0.0432547	0.122202	-30.3907	23.0659	-0.90415	0.0309311	0.0666454	0	0	0	0	0	214	85.6	-32.891	24.5503	-1.20154
-33.3461	11.6821	-1.88423	0.00297265	0.0805589	-26.8551	20.4325	-3.03364	0.0608974	0.213319	-60.7428	39.7323	-0.510017	0.131744	0.123994	-38.8947	26.1871	-1.65572	0.054232	0.124765	-32.7168	27.9986	-0.349695	0.0561828	0.0905914	-42.8507	44.059	-0.985456	0.116477	0.174006	-32.044	27.9525	-1.57802	0.0420448	0.114035	-28.5684	22.909	-0.817102	0.0309311	0.0656888	0	0	0	0	0	215	86	-32.6371	23.7984	-1.17508
-31.9238	10.0305	-1.8864	0.000297265	0.0832342	-26.7081	20.8748	-3.03469	0.0637464	0.213319	-58.474	38.5963	-0.513535	0.126677	0.122206	-40.8659	26.8332	-1.60481	0.0573668	0.123824	-33.5435	27.5812	-0.270877	0.0607527	0.0897849	-42.3166	42.2433	-0.964892	0.121449	0.171402	-33.1556	25.2168	-1.57643	0.0411373	0.11343	-26.7461	22.8093	-0.724117	0.0325255	0.0644133	0	0	0	0	0	216	86.4	-32.7882	23.4722	-1.14976
-30.5016	9.62065	-1.89096	0	0.0882878	-28.4718	21.317	-3.05303	0.0641026	0.222222	-56.2051	37.8339	-0.523577	0.123994	0.119225	-44.0163	27.4792	-1.54102	0.0639498	0.117555	-34.3702	27.1637	-0.190448	0.0698925	0.0876344	-42.3376	40.4275	-0.929668	0.126894	0.177794	-34.2673	24.6978	-1.58731	0.0396249	0.114035	-24.9238	22.7097	-0.63187	0.0331633	0.0637755	0	0	0	0	0	217	86.8	-33.0205	23.9232	-1.1257
-29.2308	10.2315	-1.88839	0.00118906	0.0924495	-30.666	22.0569	-3.05339	0.0655271	0.226852	-54.002	41.5776	-0.518782	0.115648	0.116841	-47.1666	28.1506	-1.496	0.0689655	0.11442	-35.197	27.1031	-0.115408	0.0784946	0.086828	-42.4412	39.3524	-0.911923	0.13518	0.179451	-35.379	24.2267	-1.59447	0.0375076	0.116757	-23.1014	22.61	-0.55295	0.0366709	0.0612245	0	0	0	0	0	218	87.2	-33.7391	25.0012	-1.1021
-28.0892	10.8424	-1.88988	0.00118906	0.0966112	-33.0664	22.9698	-3.05668	0.0655271	0.231481	-52.9982	46.7221	-0.535278	0.110581	0.113264	-50.317	29.0265	-1.4392	0.0755486	0.116614	-36.0237	27.7624	-0.031027	0.0862903	0.083871	-42.5448	41.1292	-0.898569	0.142756	0.189631	-36.5847	24.0203	-1.60136	0.03781	0.123412	-24.0278	22.5379	-0.466899	0.0385842	0.0605867	0	0	0	0	0	219	87.6	-34.9429	26.0996	-1.07516
-26.9476	11.4532	-1.89122	0.00118906	0.0980975	-35.4668	23.8827	-3.06451	0.0719373	0.233618	-54.7925	51.8666	-0.541237	0.109985	0.118927	-53.4673	29.9024	-1.39819	0.0821317	0.122257	-36.8505	28.462	0.0469178	0.0916667	0.0852151	-42.6485	42.9914	-0.847038	0.15483	0.199811	-38.1164	23.8139	-1.59643	0.0420448	0.124319	-26.1969	22.5241	-0.384772	0.0424107	0.059949	0	0	0	0	0	220	88	-36.2252	27.2182	-1.04934
-25.8068	12.0638	-1.8945	0.00267539	0.100178	-37.8649	24.9644	-3.06882	0.0751425	0.236111	-56.5851	57.0073	-0.550715	0.11535	0.124888	-56.6143	30.7767	-1.32295	0.0877743	0.131034	-38.3953	29.1847	0.124896	0.100806	0.0879032	-42.7491	44.8519	-0.833659	0.169744	0.204072	-39.6468	23.6054	-1.60626	0.0523291	0.130369	-28.3648	22.5093	-0.292097	0.0446429	0.0586735	0	0	0	0	0	221	88.4	-34.8453	25.293	-1.05046
-26.2383	12.1062	-1.87176	0.00297265	0.0998811	-35.5112	22.601	-2.92373	0.0737179	0.229701	-54.7917	54.302	-0.585565	0.111773	0.120417	-52.7114	28.7968	-1.31198	0.0811912	0.124765	-37.5473	26.0423	0.0766918	0.0903226	0.0833333	-40.3251	43.3036	-0.808805	0.162169	0.193419	-38.4043	20.3097	-1.64875	0.0417423	0.122505	-28.078	20.1753	-0.380245	0.0369898	0.057398	0	0	0	0	0	222	88.8	-33.8268	24.3368	-1.0551
-26.8539	12.1486	-1.84922	0.00208086	0.0972057	-33.1575	20.6499	-2.76182	0.0719373	0.224003	-53.0892	51.5967	-0.64409	0.11237	0.119821	-48.8086	27.6569	-1.31343	0.0755486	0.123197	-36.6994	26.022	0.0412058	0.0806452	0.077957	-40.3863	42.1461	-0.812338	0.155777	0.18821	-37.6552	19.4518	-1.68973	0.0353902	0.116152	-27.7912	19.3593	-0.46651	0.0315689	0.0545281	0	0	0	0	0	223	89.2	-33.1942	23.7642	-1.05806
-27.9655	12.1911	-1.83088	0.00208086	0.0963139	-32.357	20.5043	-2.61866	0.0676638	0.219373	-51.3866	48.8914	-0.67795	0.111475	0.120417	-44.9057	26.5729	-1.30589	0.0724138	0.129154	-36.2464	26.2194	-0.00616078	0.0693548	0.0741935	-40.7496	41.2325	-0.797734	0.147254	0.184422	-37.4056	19.6568	-1.74051	0.0287356	0.1098	-27.7316	18.6093	-0.544779	0.0245536	0.0529337	0	0	0	0	0	224	89.6	-32.6391	23.5675	-1.06309
-29.0771	12.2335	-1.8103	0.00208086	0.0957194	-31.6038	20.3588	-2.45819	0.0655271	0.212251	-49.684	46.1861	-0.729145	0.110879	0.126975	-41.0029	27.1038	-1.30245	0.0689655	0.130408	-35.9993	26.4168	-0.0491227	0.058871	0.0698925	-41.1128	40.3188	-0.793997	0.151752	0.182765	-37.1992	21.6308	-1.79097	0.0245009	0.103751	-28.0724	17.8592	-0.633672	0.0194515	0.0510204	0	0	0	0	0	225	90	-32.1268	23.4762	-1.06257
-30.1955	12.2759	-1.78658	0.00237812	0.0966112	-30.8506	21.0104	-2.29603	0.0694444	0.206553	-47.9815	43.4808	-0.784773	0.111773	0.131148	-37.1	27.7852	-1.26999	0.0711599	0.132602	-35.7521	26.6142	-0.10016	0.0486559	0.0680108	-41.476	39.4052	-0.780692	0.155777	0.183949	-36.9928	23.6048	-1.8254	0.0235935	0.101633	-28.7925	17.1092	-0.71948	0.0137117	0.0510204	0	0	0	0	0	226	90.4	-32.0448	23.4808	-1.06557
-31.3646	12.3184	-1.76391	0.00297265	0.0995838	-30.0974	21.8103	-2.13379	0.0744302	0.195157	-46.2789	40.7755	-0.833947	0.113562	0.132042	-36.4328	29.0461	-1.27345	0.0749216	0.139498	-35.505	26.8116	-0.14081	0.0427419	0.0666667	-41.8392	38.6275	-0.774619	0.158617	0.185843	-36.7865	25.5789	-1.86968	0.0278282	0.0980036	-30.0993	16.3591	-0.799954	0.00637755	0.0491071	0	0	0	0	0	227	90.8	-32.6989	23.6345	-1.06616
-32.5336	12.4256	-1.74324	0.00356718	0.0983948	-30.1955	22.6103	-1.98772	0.0815527	0.191239	-44.5763	38.0702	-0.875253	0.113562	0.137109	-39.2818	30.307	-1.25011	0.0808777	0.146082	-35.2578	27.9473	-0.170092	0.0435484	0.0669355	-42.6975	38.1881	-0.774715	0.164773	0.185606	-37.6473	27.5529	-1.91307	0.0320629	0.107078	-32.1004	15.609	-0.881221	0.00605867	0.051977	0	0	0	0	0	228	91.2	-33.9275	24.2668	-1.07047
-33.7027	12.7745	-1.72374	0.00564804	0.100773	-30.393	23.6235	-1.83181	0.0918803	0.183405	-42.8738	35.3649	-0.936931	0.116244	0.141282	-42.1308	32.0561	-1.24659	0.0830721	0.152351	-35.0106	30.0656	-0.219655	0.047043	0.0736559	-46.8918	37.9182	-0.760824	0.178267	0.192235	-40.2433	31.657	-1.95037	0.0341803	0.111918	-34.1016	14.9411	-0.964314	0.00669643	0.0545281	0	0	0	0	0	229	91.6	-35.7083	25.7744	-1.07171
-34.8718	13.3264	-1.70554	0.00951249	0.101367	-30.5906	24.6508	-1.67891	0.0990028	0.183048	-44.8954	35.77	-0.970069	0.119523	0.142772	-44.9799	35.1456	-1.23603	0.0852665	0.154859	-34.8151	32.1838	-0.261694	0.0505376	0.0798387	-51.0861	38.6092	-0.759436	0.191051	0.200521	-43.5313	37.9543	-1.99033	0.0369026	0.118572	-36.6049	14.3299	-1.04342	0.00733418	0.0577168	0	0	0	0	0	230	92	-23.5073	18.2527	-0.83672
-36.0399	14.4453	-1.68466	0.0130797	0.102854	-30.7887	25.7543	-1.52502	0.10755	0.180556	-49.5089	38.8283	-1.0332	0.123696	0.145156	-47.825	40.715	-1.23486	0.0918495	0.148589	0	0	0	0	0	0	0	0	0	0	-47.4034	44.5316	-2.05274	0.0429522	0.124622	0	0	0	0	0	0	0	0	0	0	231	92.4	-22.4229	18.2397	-0.806129
-35.267	12.8878	-1.66593	0.0104043	0.10107	-32.1692	23.2891	-1.51412	0.0986467	0.17094	-48.3047	39.2406	-1.14914	0.116542	0.144858	-43.321	42.3652	-1.17447	0.0799373	0.146708	0	0	0	0	0	0	0	0	0	0	-42.7443	46.3743	-1.75151	0.0420448	0.120992	0	0	0	0	0	0	0	0	0	0	232	92.8	-21.5289	18.3369	-0.779991
-34.4941	12.1912	-1.64383	0.00713436	0.100178	-33.5496	20.9367	-1.51334	0.0929487	0.157407	-47.1005	39.6717	-1.28293	0.109985	0.142772	-39.0981	44.0155	-1.12693	0.0736677	0.14232	0	0	0	0	0	0	0	0	0	0	-39.518	48.217	-1.45289	0.0408348	0.116455	0	0	0	0	0	0	0	0	0	0	233	93.2	-20.9982	18.6723	-0.748565
-34.0283	12.2526	-1.61836	0.00743163	0.0995838	-34.9301	19.97	-1.50406	0.0854701	0.146011	-47.2233	40.1028	-1.40199	0.104322	0.143368	-34.8751	45.6657	-1.07473	0.0636364	0.13605	0	0	0	0	0	0	0	0	0	0	-37.9271	50.0597	-1.13794	0.0468845	0.11343	0	0	0	0	0	0	0	0	0	0	234	93.6	-21.0386	19.1084	-0.722459
-34.095	12.314	-1.59657	0.00624257	0.0983948	-36.3199	19.8439	-1.50874	0.0730057	0.137821	-48.3265	40.5339	-1.54615	0.0977645	0.144262	-34.2694	47.316	-1.01372	0.0567398	0.125392	0	0	0	0	0	0	0	0	0	0	-36.3363	51.9675	-0.836949	0.0583787	0.108288	0	0	0	0	0	0	0	0	0	0	235	94	-21.2384	19.5468	-0.696683
-34.79	12.3754	-1.5743	0.00653983	0.0963139	-37.8773	19.7178	-1.52225	0.0637464	0.125712	-49.5483	40.9651	-1.68349	0.0932936	0.143964	-34.1846	48.9662	-0.95996	0.0476489	0.121317	0	0	0	0	0	0	0	0	0	0	-34.7454	53.897	-0.530152	0.0653358	0.102238	0	0	0	0	0	0	0	0	0	0	236	94.4	-21.5664	20.0624	-0.666834
-35.7235	12.4369	-1.54938	0.00743163	0.0870987	-39.4346	20.2854	-1.52241	0.0551994	0.10933	-51.6853	41.3962	-1.80583	0.0894188	0.146647	-34.0997	50.6165	-0.894362	0.0451411	0.115361	0	0	0	0	0	0	0	0	0	0	-33.1546	55.8265	-0.22953	0.0716878	0.0952813	0	0	0	0	0	0	0	0	0	0	237	94.8	-21.9207	20.6024	-0.639097
-36.6571	12.4998	-1.52841	0.010107	0.0790725	-40.992	20.9428	-1.51874	0.0480769	0.110043	-53.8223	41.8273	-1.94131	0.0870343	0.156185	-34.0148	52.3952	-0.837205	0.0470219	0.111285	0	0	0	0	0	0	0	0	0	0	-31.7999	57.756	0.0737888	0.0756201	0.0804598	0	0	0	0	0	0	0	0	0	0	238	95.2	-23.1379	21.1756	-0.60933
-37.5906	12.6181	-1.50432	0.0124851	0.0755054	-42.5493	21.6811	-1.51752	0.0459402	0.111111	-56.3593	42.2584	-2.07328	0.0870343	0.163934	-38.5325	54.3372	-0.771257	0.0523511	0.105956	0	0	0	0	0	0	0	0	0	0	-33.209	59.6855	0.382408	0.0828796	0.0710829	0	0	0	0	0	0	0	0	0	0	239	95.6	-24.4243	21.7494	-0.579763
-38.778	12.7409	-1.48869	0.0142687	0.0734245	-44.1067	22.4194	-1.51217	0.048433	0.110399	-59.2259	42.6895	-2.19895	0.0891207	0.168703	-43.0899	56.2793	-0.697786	0.0611285	0.110031	0	0	0	0	0	0	0	0	0	0	-34.618	61.6151	0.679735	0.0871143	0.0713854	0	0	0	0	0	0	0	0	0	0	240	96	-21.7102	15.3132	-0.658528
-40.0002	12.8999	-1.46298	0.0172414	0.074019	-45.6624	23.3294	-1.50655	0.0548433	0.118234	-62.0873	43.3709	-2.31909	0.0885246	0.173174	-47.6421	58.2182	-0.638136	0.0714734	0.117555	0	0	0	0	0	0	0	0	0	0	0	0	0	0	0	0	0	0	0	0	0	0	0	0	0	241	96.4	-20.2599	14.5938	-0.61743
-39.5116	12.1227	-1.46774	0.0139715	0.074019	-44.2548	23.1984	-1.3802	0.0509259	0.110043	-55.5653	41.5867	-2.09544	0.0837556	0.170194	-43.007	54.4361	-0.613486	0.0592476	0.110972	0	0	0	0	0	0	0	0	0	0	0	0	0	0	0	0	0	0	0	0	0	0	0	0	0	242	96.8	-18.8095	14.084	-0.576897
-39.023	11.7133	-1.46573	0.00921522	0.0722354	-42.8472	23.0674	-1.25431	0.0527066	0.108618	-49.0433	41.0348	-1.87954	0.0822653	0.164531	-38.3719	50.9401	-0.5925	0.0601881	0.106583	0	0	0	0	0	0	0	0	0	0	0	0	0	0	0	0	0	0	0	0	0	0	0	0	0	243	97.2	-17.3591	13.9028	-0.537494
-38.5344	11.9257	-1.47026	0.00713436	0.0722354	-41.4396	22.9364	-1.13312	0.0573362	0.105413	-42.5213	42.4608	-1.66154	0.0798808	0.157377	-33.7368	47.8028	-0.572531	0.061442	0.0971787	0	0	0	0	0	0	0	0	0	0	0	0	0	0	0	0	0	0	0	0	0	0	0	0	0	244	97.6	-16.306	13.7505	-0.496592
-38.0457	12.279	-1.47676	0.00564804	0.07283	-40.032	22.8054	-1.00704	0.0626781	0.107194	-39.5748	44.005	-1.43175	0.0789866	0.147243	-29.1016	44.6654	-0.553773	0.0623824	0.0918495	0	0	0	0	0	0	0	0	0	0	0	0	0	0	0	0	0	0	0	0	0	0	0	0	0	245	98	-15.4858	13.6409	-0.458397
-37.5571	12.6324	-1.48405	0.0068371	0.07283	-38.6244	22.7418	-0.888627	0.0690883	0.112892	-37.8523	45.8658	-1.21217	0.0766021	0.132042	-25.3387	41.528	-0.54073	0.0592476	0.0915361	0	0	0	0	0	0	0	0	0	0	0	0	0	0	0	0	0	0	0	0	0	0	0	0	0	246	98.4	-15.5468	13.5805	-0.415065
-37.0685	13.1346	-1.4875	0.00891795	0.0752081	-37.2168	22.9727	-0.762527	0.0772792	0.117877	-37.4861	47.7267	-0.967669	0.076304	0.117139	-28.1503	38.3907	-0.517884	0.0583072	0.0865204	0	0	0	0	0	0	0	0	0	0	0	0	0	0	0	0	0	0	0	0	0	0	0	0	0	247	98.8	-16.347	13.5644	-0.372746
-36.5799	13.6748	-1.48799	0.0104043	0.0755054	-35.8092	23.5641	-0.642371	0.0872507	0.120726	-40.4844	49.5875	-0.729385	0.0777943	0.108793	-34.2493	35.2533	-0.494966	0.0617555	0.0840125	0	0	0	0	0	0	0	0	0	0	0	0	0	0	0	0	0	0	0	0	0	0	0	0	0	248	99.2	-17.2513	14.1271	-0.332158
-36.0912	14.2151	-1.48824	0.0109988	0.0758026	-34.5527	24.6164	-0.518424	0.0961538	0.119658	-44.0425	51.4483	-0.509019	0.0822653	0.101639	-40.5757	36.8636	-0.473739	0.061442	0.0752351	0	0	0	0	0	0	0	0	0	0	0	0	0	0	0	0	0	0	0	0	0	0	0	0	0	249	99.6	-18.3543	14.979	-0.293621
-35.6026	14.8877	-1.49877	0.0127824	0.0775862	-33.2978	25.8296	-0.395666	0.109687	0.11859	-49.1334	53.3091	-0.282661	0.0900149	0.0986587	-47.1545	40.7842	-0.465498	0.0633229	0.0736677	0	0	0	0	0	0	0	0	0	0	0	0	0	0	0	0	0	0	0	0	0	0	0	0	0
[truncated: 7 more columns]

## Sheet: 2
P1					P2					P3					P4					P5					P6					P7					P8					P9							min	max	avg
min	max	avg	ccw [%]	cw [%]	min	max	avg	ccw [%]	cw [%]	min	max	avg	ccw [%]	cw [%]	min	max	avg	ccw [%]	cw [%]	min	max	avg	ccw [%]	cw [%]	min	max	avg	ccw [%]	cw [%]	min	max	avg	ccw [%]	cw [%]	min	max	avg	ccw [%]	cw [%]	min	max	avg	ccw [%]	cw [%]	0	0	-39.8024	39.83	-0.496669
-26.5391	16.9635	-2.13275	0.0263158	0.140664	-42.796	36.6497	-2.74336	0.0768194	0.188342	-52.0891	41.0068	-2.34793	0.0631378	0.154018	-37.4816	44.4298	1.49726	0.174569	0.115764	-26.5913	27.0453	0.6127	0.115985	0.0937188	-55.7242	69.5676	1.79347	0.200368	0.129464	-57.1355	57.7578	-0.716623	0.0875706	0.121155	-31.0667	31.1273	-0.574468	0.0508005	0.0871305	-28.798	33.9218	0.141683	0.0838207	0.0831709	1	0.4	-37.5384	37.253	-0.619514
-25.2409	15.5942	-2.13174	0.0191103	0.140038	-41.3475	32.9751	-2.75135	0.0690701	0.184299	-49.4654	41.3235	-2.35472	0.0621811	0.15338	-34.9192	42.6365	1.28287	0.163485	0.111761	-25.652	26.252	0.402072	0.10103	0.0900631	-55.9562	62.7756	1.5489	0.189076	0.118172	-51.4107	52.297	-0.89014	0.0825487	0.119586	-27.9435	28.7946	-0.657593	0.049569	0.0855911	-25.9104	32.628	-0.0239206	0.0734243	0.0760234	2	0.8	-35.6128	34.7551	-0.738938
-25.2087	14.225	-2.13069	0.014411	0.140038	-39.8989	29.3005	-2.76277	0.0592992	0.177898	-46.8417	41.968	-2.34421	0.0586735	0.15912	-32.9772	40.8433	1.0776	0.158559	0.111145	-24.7126	25.7804	0.177908	0.0860751	0.0834164	-56.1882	55.9836	1.31708	0.17542	0.104254	-45.686	46.8362	-1.07273	0.0734463	0.118644	-24.8203	26.5247	-0.732154	0.0486453	0.0889778	-24.1819	31.3342	-0.180482	0.0623782	0.0669266	3	1.2	-34.3234	32.3005	-0.854274
-25.1765	12.8557	-2.1355	0.0106516	0.138158	-38.4504	25.6259	-2.77691	0.0498652	0.169811	-44.2181	42.6125	-2.33157	0.0564413	0.166454	-35.4557	39.05	0.876464	0.144704	0.107451	-24.5894	25.5141	-0.0291932	0.0744433	0.078099	-56.4201	49.1916	1.09529	0.156775	0.0932248	-39.9613	41.3755	-1.25049	0.0662272	0.118958	-21.6971	24.4385	-0.804772	0.0498768	0.0929803	-22.9416	30.0403	-0.33179	0.0516569	0.0643275	4	1.6	-33.6504	30.0747	-0.969774
-25.1443	11.4864	-2.1292	0.0056391	0.134398	-37.0018	21.96	-2.7588	0.0421159	0.162399	-41.5944	43.2571	-2.33625	0.0538903	0.168367	-37.9342	37.6174	0.685692	0.138547	0.107143	-24.9757	25.4688	-0.253251	0.0628116	0.0754403	-56.6521	42.3996	0.867343	0.141544	0.0835084	-34.848	36.0257	-1.42627	0.0555556	0.117075	-22.5064	23.7111	-0.887622	0.0541872	0.0932882	-22.197	28.7465	-0.489607	0.0396361	0.0604288	5	2	-34.8232	28.6096	-1.09039
-25.1121	10.2274	-2.12834	0.0018797	0.128759	-35.5533	20.1661	-2.76342	0.0363881	0.168801	-39.3396	43.9016	-2.32959	0.0513393	0.165179	-40.4127	36.6123	0.490932	0.127771	0.107451	-25.4945	26.33	-0.490629	0.0591559	0.0757727	-56.8841	35.6076	0.625417	0.126576	0.0769433	-40.4534	30.7569	-1.6059	0.0442561	0.111739	-24.5075	26.4321	-0.966794	0.0544951	0.0917488	-25.6515	27.4526	-0.645168	0.0282651	0.0614035	6	2.4	-36.7151	27.5686	-1.20509
-25.0799	9.56187	-2.13253	0	0.126566	-34.1047	19.3756	-2.73913	0.0326819	0.168801	-40.6719	44.5461	-2.3379	0.049426	0.16486	-42.8912	36.68	0.289146	0.119458	0.110222	-26.0132	28.3386	-0.694363	0.0598205	0.079096	-57.116	28.8156	0.392985	0.112395	0.0819328	-47.23	25.488	-1.78481	0.0282486	0.101381	-27.5343	29.153	-1.04419	0.0544951	0.0920567	-29.7942	26.1588	-0.795025	0.0230669	0.0610786	7	2.8	-39.6201	27.5049	-1.3268
-25.0477	10.1174	-2.13487	0.000313283	0.12406	-32.6562	18.585	-2.75452	0.0286388	0.165768	-48.4149	45.1906	-2.32875	0.0529337	0.162628	-45.3697	38.2143	0.0816909	0.117611	0.115148	-26.532	30.3473	-0.928431	0.0604852	0.0907278	-57.899	28.1314	0.154532	0.106092	0.0916492	-55.1578	20.2192	-1.9561	0.0163214	0.0900816	-31.5308	31.8739	-1.12242	0.0578818	0.0929803	-33.9726	24.8649	-0.952327	0.0214425	0.0646524	8	3.2	-42.6689	27.9937	-1.44842
-25.0154	10.9867	-2.13589	0.00156642	0.127506	-31.6432	17.9461	-2.7521	0.0309973	0.165094	-56.1578	45.993	-2.32584	0.0580357	0.163265	-47.8482	39.7485	-0.13485	0.116071	0.121921	-27.0508	32.356	-1.14891	0.0634762	0.113327	-58.7476	31.6485	-0.0910335	0.103466	0.102679	-63.594	15.0023	-2.13827	0.0081607	0.081607	-35.5389	34.6913	-1.20756	0.0603448	0.100985	-38.4242	23.5711	-1.1013	0.0204678	0.0659519	9	3.6	-45.9415	28.9307	-1.56675
-25.3896	12.1333	-2.14602	0.0037594	0.12782	-31.9534	17.7463	-2.7616	0.0353774	0.16442	-63.9007	46.9631	-2.33083	0.0625	0.161352	-50.3267	41.2827	-0.323609	0.112377	0.127155	-27.5695	34.3646	-1.35458	0.0681289	0.139249	-59.5963	35.1656	-0.31024	0.107931	0.119223	-72.0301	12.0271	-2.31265	0.00408035	0.0784683	-39.547	37.7384	-1.28573	0.0631158	0.109606	-43.1601	22.9554	-1.27551	0.0220923	0.0721248	10	4	-49.5657	30.4461	-1.68477
-27.1162	13.2799	-2.13803	0.0075188	0.130952	-32.2637	18.5265	-2.75339	0.0444744	0.165768	-71.6436	47.9898	-2.30889	0.0672832	0.158482	-52.8247	42.817	-0.553431	0.112069	0.136084	-29.8811	36.3733	-1.5749	0.0717846	0.159189	-60.4449	39.1838	-0.560392	0.117384	0.135767	-80.4663	11.8967	-2.4825	0.00156937	0.084118	-43.555	40.7854	-1.35846	0.0661946	0.11915	-47.896	23.163	-1.43298	0.0243665	0.0812216	11	4.4	-51.8042	27.7679	-1.97923
-24.5409	12.3001	-2.13737	0.00595238	0.127193	-28.9323	16.1761	-2.89193	0.0340296	0.168127	-66.1899	41.5413	-2.2423	0.0596301	0.14764	-51.4556	38.3552	-0.753336	0.0982143	0.125616	-27.1985	33.2294	-1.65192	0.0568295	0.151878	-58.7427	36.298	-0.77945	0.105042	0.133403	-93.0451	10.7355	-3.39715	0.000627746	0.0988701	-55.8041	36.9973	-1.81296	0.0705049	0.129926	-60.3292	24.2785	-2.14664	0.0263158	0.0977908	12	4.8	-54.8658	26.2863	-2.28147
-24.1308	11.4302	-2.13269	0.00438596	0.122807	-27.1632	14.6198	-3.03474	0.0272911	0.169137	-60.7361	35.3013	-2.20254	0.0481505	0.133929	-50.106	33.8933	-0.992562	0.0877463	0.126232	-26.3087	31.5645	-1.73975	0.0531738	0.144566	-57.9668	33.9133	-0.997449	0.103729	0.141282	-105.624	16.1828	-4.30408	0.00753296	0.12398	-68.3604	34.2776	-2.25146	0.0741995	0.14101	-73.3963	25.3939	-2.87798	0.0318389	0.115984	13	5.2	-58.9816	26.08	-2.57992
-23.7208	10.962	-2.13009	0.00313283	0.115915	-27.6509	14.7822	-3.18281	0.0192049	0.173518	-55.2823	29.3899	-2.14613	0.0385842	0.129783	-48.7564	31.1672	-1.20626	0.0757389	0.130542	-27.78	33.7653	-1.82473	0.0521768	0.141243	-59.0187	32.3815	-1.22552	0.111082	0.151786	-118.203	24.2044	-5.20163	0.0150659	0.14344	-81.759	31.5579	-2.68092	0.0760468	0.144089	-88.6638	26.5094	-3.62116	0.0396361	0.130604	14	5.6	-64.7671	27.1004	-2.8762
-23.3107	11.2086	-2.12118	0.00407268	0.108396	-28.2492	14.9445	-3.32825	0.0101078	0.179245	-49.8285	23.4784	-2.06973	0.0309311	0.125319	-48.0165	29.6309	-1.41122	0.0720443	0.13516	-33.4597	35.9661	-1.91836	0.0551678	0.141243	-67.6407	34.2325	-1.44984	0.118697	0.156775	-130.781	32.2259	-6.10895	0.0304457	0.179535	-95.1577	34.592	-3.13068	0.0788177	0.153325	-106.459	27.6249	-4.34758	0.0490578	0.139051	15	6	-71.0758	28.8515	-3.1811
-24.2857	12.0561	-2.11724	0.00689223	0.110902	-28.8474	15.1069	-3.48422	0.00673854	0.186321	-44.8298	18.3531	-2.02603	0.0235969	0.122449	-47.7344	28.839	-1.64272	0.0723522	0.136084	-39.1393	38.1669	-1.99231	0.0548355	0.146228	-76.2627	38.1919	-1.68635	0.124475	0.164916	-143.36	40.2475	-7.02232	0.0408035	0.204331	-108.556	39.7358	-3.58455	0.0846675	0.160099	-126.666	28.9663	-5.07414	0.05718	0.143275	16	6.4	-77.6275	31.4796	-3.47894
-25.4913	13.415	-2.10215	0.00877193	0.109336	-29.4457	15.2693	-3.64674	0.00673854	0.189353	-40.343	16.6822	-1.98818	0.026148	0.115753	-47.4523	28.0562	-1.84725	0.0738916	0.141318	-44.819	40.3676	-2.06903	0.0561648	0.153207	-84.8847	42.7429	-1.90104	0.13209	0.172794	-156.159	48.269	-7.92757	0.0530446	0.225361	-122.583	44.8797	-4.00538	0.0865148	0.169643	-147.47	33.6343	-5.82314	0.0675763	0.151072	17	6.8	-84.6023	34.9595	-3.77504
-26.6969	14.8999	-2.09902	0.012218	0.112155	-30.044	15.4317	-3.77351	0.00673854	0.191375	-37.5391	19.4748	-1.92932	0.0369898	0.111288	-47.1702	29.0034	-2.07494	0.0788177	0.151786	-50.4986	42.5684	-2.15613	0.0584912	0.158524	-93.7463	47.8787	-2.11848	0.138918	0.176996	-169.32	56.2906	-8.82558	0.061833	0.242938	-137.022	50.0235	-4.45059	0.0905172	0.177032	-169.383	39.0645	-6.54777	0.0773229	0.155621	18	7.2	-92.455	39.2237	-4.07668
-27.9024	16.4687	-2.09307	0.0134712	0.115602	-31.2384	15.594	-3.91849	0.00808625	0.193059	-38.9	23.5333	-1.87175	0.0471939	0.112883	-48.029	35.0113	-2.2937	0.080665	0.161638	-56.3407	44.7692	-2.25116	0.0608175	0.160518	-103.349	53.3916	-2.35866	0.153361	0.188025	-182.481	64.3122	-9.72944	0.0687382	0.258004	-152.558	55.1674	-4.89611	0.0939039	0.184729	-191.296	44.7656	-7.27776	0.0880442	0.160169	19	7.6	-100.466	43.6997	-4.37899
-29.1793	18.0376	-2.08127	0.0156642	0.117481	-33.0047	15.7564	-4.07526	0.0128032	0.193396	-40.5326	28.6618	-1.8076	0.0564413	0.120855	-48.9325	41.0191	-2.52397	0.0895936	0.170874	-62.1906	46.97	-2.34657	0.0651379	0.165503	-112.952	59.3503	-2.59194	0.165966	0.198004	-195.643	72.3337	-10.6375	0.0747018	0.265537	-168.555	60.3112	-5.3376	0.100369	0.195505	-213.209	50.8572	-8.00923	0.0977908	0.169591	20	8	-108.989	48.3192	-4.67648
-30.7192	19.6065	-2.07888	0.018797	0.119987	-35.564	17.1157	-4.23103	0.0181941	0.198113	-42.9635	33.7902	-1.73591	0.0672832	0.132972	-52.5823	47.027	-2.77253	0.0926724	0.17734	-68.0405	49.1708	-2.41869	0.0734463	0.173812	-122.555	65.4035	-2.81924	0.178571	0.207983	-208.804	80.3553	-11.5347	0.0800377	0.27715	-184.551	65.455	-5.77059	0.107451	0.202586	-235.123	56.9488	-8.72672	0.109162	0.180637	21	8.4	-114.477	49.1129	-5.04929
-29.9413	16.363	-2.43609	0.0119048	0.126253	-35.1281	16.7849	-4.58054	0.0195418	0.221698	-45.6505	28.7653	-2.18871	0.0532526	0.128827	-64.6263	51.6731	-3.16193	0.0843596	0.181034	-74.5234	48.0964	-2.62362	0.0697906	0.172483	-130.251	62.1172	-3.02032	0.181723	0.211922	-218.032	89.1034	-12.1969	0.0775267	0.275895	-190.706	67.5228	-5.98375	0.105296	0.200123	-241.434	61.5904	-9.25171	0.112086	0.18616	22	8.8	-121.443	50.4747	-5.4286
-34.7155	13.1195	-2.79261	0.00720551	0.135338	-35.2278	17.651	-4.94479	0.0205526	0.244946	-48.3644	23.7403	-2.66982	0.0436862	0.122768	-77.5622	56.3192	-3.55371	0.0812808	0.186268	-82.8912	47.022	-2.84445	0.0651379	0.17215	-141.722	60.7661	-3.19649	0.192752	0.219275	-227.897	97.8516	-12.8679	0.0743879	0.282486	-196.86	70.3124	-6.2043	0.108682	0.198892	-247.745	67.4898	-9.78326	0.11306	0.191683	23	9.2	-128.874	52.2829	-5.80267
-40.1972	11.2493	-3.15531	0.0037594	0.14881	-35.4569	18.5171	-5.30525	0.0229111	0.254043	-51.5956	20.1155	-3.12151	0.0293367	0.123406	-90.4981	60.9654	-3.96058	0.0794335	0.1992	-93.6072	45.9476	-3.05535	0.0648056	0.171486	-153.273	60.5926	-3.39615	0.20667	0.230567	-238.169	106.6	-13.5108	0.0753296	0.286252	-203.015	73.1583	-6.41909	0.110837	0.197044	-254.056	73.4	-10.2999	0.11501	0.196556	24	9.6	-137.316	54.9846	-6.17901
-45.8294	12.4488	-3.50688	0.00501253	0.159461	-40.9964	20.4535	-5.66492	0.0229111	0.256402	-55.129	17.5661	-3.57215	0.0169005	0.134247	-103.434	65.6115	-4.36947	0.0800493	0.205049	-104.323	44.8733	-3.26295	0.0654703	0.174144	-167.65	61.6164	-3.60248	0.216124	0.237395	-248.522	115.348	-14.1518	0.079096	0.287508	-209.596	76.0042	-6.64616	0.106219	0.194581	-260.367	80.9398	-10.8343	0.11566	0.20013	25	10	-146.332	58.0584	-6.54723
-51.4616	13.9924	-3.87433	0.00689223	0.169799	-50.2217	22.6945	-6.01829	0.0242588	0.260445	-58.6623	15.2049	-4.01181	0.00765306	0.144452	-116.37	70.9502	-4.79296	0.0803571	0.213054	-116.229	44.9616	-3.47678	0.0681289	0.175141	-182.027	63.0011	-3.7682	0.220588	0.245273	-259.089	124.096	-14.7844	0.0800377	0.286252	-216.249	78.9935	-6.86085	0.10314	0.190887	-266.678	88.6317	-11.3375	0.118908	0.20078	26	10.4	-155.415	62.1293	-6.92667
-57.0937	15.7445	-4.22871	0.00783208	0.181078	-59.7226	24.9355	-6.37438	0.0262803	0.265499	-62.2373	12.9052	-4.46305	0.0028699	0.158163	-129.306	76.5149	-5.19408	0.0797414	0.21798	-128.242	47.3593	-3.70114	0.0704553	0.175806	-196.404	70.0137	-3.96471	0.22584	0.248162	-269.838	132.844	-15.4697	0.0812932	0.290647	-222.901	82.5227	-7.10355	0.106835	0.187808	-272.989	96.3236	-11.8407	0.117284	0.204029	27	10.8	-164.69	66.9772	-7.29727
-63.0467	17.4967	-4.59078	0.00845865	0.192356	-69.2235	27.2158	-6.72776	0.0293127	0.268531	-66.1532	11.8091	-4.90479	0.0028699	0.168048	-142.7	82.0795	-5.60034	0.0809729	0.217672	-140.256	49.7569	-3.92401	0.074111	0.177135	-210.781	81.9947	-4.13496	0.230305	0.252101	-281.199	142.374	-16.1387	0.0938481	0.298807	-229.554	86.0519	-7.30259	0.107451	0.184113	-279.3	104.015	-12.3515	0.122482	0.21345	28	11.2	-173.994	72.376	-7.67218
-69.2325	19.2488	-4.94721	0.0100251	0.205201	-78.7243	29.8888	-7.08261	0.0309973	0.271226	-70.0691	14.9977	-5.35407	0.00765306	0.179528	-156.12	87.6441	-6.01236	0.0874384	0.221059	-152.269	52.1545	-4.14527	0.078099	0.180459	-225.158	93.9756	-4.37365	0.237132	0.256303	-292.559	152.186	-16.7465	0.109228	0.302574	-236.207	89.5812	-7.52074	0.10899	0.187192	-285.612	111.707	-12.8672	0.125406	0.223847	29	11.6	-183.321	77.8035	-8.04577
-75.4183	21.001	-5.29782	0.0106516	0.215852	-88.2252	32.5617	-7.44052	0.0336927	0.273922	-73.985	18.1965	-5.80803	0.0153061	0.190689	-169.54	93.3715	-6.42132	0.0960591	0.220135	-164.282	54.5522	-4.36878	0.0824194	0.184779	-239.536	105.957	-4.54935	0.242122	0.261029	-303.919	161.997	-17.4209	0.122097	0.30634	-243.064	93.1104	-7.73132	0.112993	0.189963	-291.923	119.484	-13.3739	0.12898	0.237167	30	12	-192.692	83.4481	-8.41473
-81.6041	22.7532	-5.65673	0.0115915	0.225564	-97.7261	35.2346	-7.78975	0.0357143	0.277628	-77.9009	21.3953	-6.25379	0.0223214	0.204401	-182.96	99.7918	-6.84424	0.106835	0.222291	-176.296	56.9498	-4.58382	0.0877368	0.193752	-253.913	117.937	-4.69969	0.25105	0.263918	-315.28	171.809	-18.0701	0.132454	0.309479	-250.161	96.6397	-7.93916	0.118842	0.194273	-298.387	128.523	-13.8953	0.132229	0.250487	31	12.4	-196.026	83.7424	-8.6492
-95.4844	21.7998	-6.20815	0.0115915	0.235902	-108.735	37.4947	-8.20468	0.0357143	0.282008	-83.2428	21.7215	-6.77423	0.0162628	0.205995	-186.534	96.5794	-7.57114	0.103448	0.225369	-184.796	58.6675	-4.86318	0.0857428	0.194749	-253.321	124.035	-4.90995	0.254727	0.267069	-311.338	172.147	-17.9319	0.134652	0.312618	-244.835	96.0588	-7.45269	0.117611	0.187808	-295.944	125.178	-13.9269	0.126381	0.245289	32	12.8	-199.659	84.4103	-8.86864
-109.582	20.8465	-6.75461	0.0125313	0.25	-120.768	39.7548	-8.59818	0.037062	0.283693	-89.3741	22.8909	-7.29273	0.0114796	0.21014	-190.107	95.0877	-8.32008	0.103448	0.230603	-193.296	60.3852	-5.16341	0.0864074	0.193087	-253.061	130.132	-5.08815	0.263918	0.271271	-307.397	172.485	-17.7993	0.135907	0.314815	-239.692	95.4779	-6.91683	0.120998	0.181958	-293.654	122.632	-13.8844	0.123132	0.242365	33	13.2	-203.551	85.1979	-9.09122
-123.68	20.1432	-7.29937	0.0128446	0.259712	-133.463	42.0148	-9.00234	0.0380728	0.290768	-95.5584	24.0603	-7.8038	0.0137117	0.217793	-194.128	93.9371	-9.06506	0.107143	0.2383	-201.796	62.1029	-5.46414	0.0870721	0.194084	-253.504	136.23	-5.30457	0.271534	0.27521	-303.455	172.824	-17.644	0.134652	0.320778	-234.782	94.8971	-6.39158	0.135468	0.182574	-291.594	120.573	-13.8461	0.121183	0.238467	34	13.6	-207.854	86.183	-9.31599
-137.778	19.9286	-7.8472	0.0125313	0.26817	-146.157	44.2749	-9.40259	0.0397574	0.28942	-101.743	25.2296	-8.3086	0.0169005	0.223533	-198.488	94.0736	-9.79972	0.115456	0.248461	-210.296	63.8206	-5.75477	0.0877368	0.192423	-253.948	142.327	-5.4911	0.280987	0.278887	-299.514	173.162	-17.4885	0.136849	0.320778	-231.979	94.3162	-5.89154	0.148091	0.181342	-290.786	118.514	-13.86	0.116959	0.238791	35	14	-212.38	87.208	-9.53429
-151.876	19.7141	-8.38287	0.0137845	0.273183	-159.733	46.5349	-9.80544	0.041779	0.291779	-107.927	26.399	-8.81857	0.0191327	0.223852	-202.848	94.5703	-10.5838	0.121613	0.251847	-218.795	65.5383	-6.04344	0.0857428	0.196743	-255.216	148.424	-5.66427	0.287815	0.281513	-295.572	173.501	-17.3591	0.139987	0.322034	-229.473	93.7353	-5.33904	0.15548	0.179187	-289.979	116.455	-13.812	0.118908	0.239116	36	14.4	-217.067	88.362	-9.75119
-166.085	19.855	-8.92626	0.0134712	0.277569	-173.557	48.795	-10.2211	0.0454852	0.287399	-114.111	27.897	-9.3369	0.0274235	0.231824	-207.643	95.0671	-11.3081	0.13085	0.253079	-227.295	67.256	-6.33655	0.0847458	0.200066	-257.137	154.522	-5.82859	0.290704	0.281775	-291.631	173.839	-17.1643	0.142498	0.319837	-226.967	93.1545	-4.8345	0.162562	0.176416	-289.171	114.873	-13.8044	0.122482	0.244639	37	14.8	-221.983	89.7561	-9.97385
-180.546	20.8112	-9.4693	0.0137845	0.282581	-187.381	51.0551	-10.6318	0.0498652	0.283693	-120.296	29.6998	-9.85149	0.0322066	0.235332	-213.343	95.5638	-12.0825	0.139778	0.256158	-235.795	68.9737	-6.62039	0.0874045	0.201063	-259.725	160.619	-6.00237	0.296481	0.2823	-287.932	174.177	-16.9882	0.147207	0.314501	-224.461	93.0935	-4.31564	0.173645	0.175185	-288.364	113.812	-13.8029	0.122807	0.248863	38	15.2	-227.488	91.1985	-10.2003
-195.008	21.9726	-10.0172	0.0134712	0.285088	-201.205	53.3151	-11.0414	0.0552561	0.28066	-127.4	31.5027	-10.3446	0.0389031	0.241709	-219.042	96.0605	-12.8423	0.147475	0.256466	-244.295	70.6914	-6.90489	0.0913925	0.207046	-264.581	166.717	-6.17832	0.300945	0.285452	-284.504	174.516	-16.8974	0.150973	0.315129	-223.305	93.2609	-3.81054	0.181958	0.171798	-288.051	112.751	-13.766	0.125731	0.251462	39	15.6	-233.646	92.887	-10.4285
-209.469	23.54	-10.5569	0.0150376	0.286654	-215.029	55.5752	-11.4555	0.0596361	0.275606	-134.778	33.3055	-10.8745	0.0455995	0.246811	-224.741	97.6432	-13.5984	0.154865	0.257389	-252.795	72.4091	-7.18379	0.0950482	0.213692	-271.899	172.814	-6.35629	0.303309	0.286502	-281.076	174.854	-16.7722	0.154739	0.313873	-224.089	94.1519	-3.29821	0.188424	0.169643	-288.933	111.69	-13.7603	0.12768	0.25666	40	16	-240.132	94.5904	-10.6558
-223.931	25.1326	-11.099	0.0156642	0.2901	-228.852	57.8353	-11.8725	0.0636792	0.267183	-142.423	35.1084	-11.3709	0.051977	0.248406	-230.44	99.3353	-14.3518	0.164101	0.263547	-261.295	74.1268	-7.49574	0.0977069	0.218345	-281.909	178.911	-6.56673	0.30541	0.289391	-277.649	175.193	-16.633	0.157564	0.310734	-224.873	95.0429	-2.76356	0.195813	0.169335	-289.814	110.629	-13.7494	0.131904	0.261858	41	16.4	-236.996	94.2335	-10.6349
-229.051	26.165	-11.2185	0.0159774	0.291667	-228.557	60.4519	-11.8916	0.0626685	0.271226	-139.086	31.1179	-12.3124	0.0446429	0.253189	-230.068	100.538	-14.4367	0.160406	0.263547	-259.638	77.8888	-7.57381	0.0967099	0.210369	-276.648	176.119	-6.49151	0.306985	0.286239	-269.999	171.056	-16.1311	0.15882	0.30634	-218.44	94.8113	-2.41299	0.195197	0.168719	-281.48	109.954	-13.2458	0.141975	0.259584	42	16.8	-234.268	94.3372	-10.6197
-234.17	27.6612	-11.343	0.0162907	0.285088	-229.293	63.0684	-11.9284	0.0626685	0.28066	-135.748	30.177	-13.217	0.0357143	0.257653	-230.041	101.741	-14.5264	0.155788	0.266933	-257.981	81.6507	-7.64393	0.0987039	0.20339	-272.427	173.326	-6.49728	0.30541	0.286765	-262.348	166.918	-15.6059	0.15725	0.299435	-213.261	95.2123	-2.07079	0.197044	0.16718	-273.146	109.28	-12.7447	0.147823	0.259909	43	17.2	-231.781	94.8981	-10.6033
-239.29	29.181	-11.4624	0.0175439	0.284148	-230.029	65.685	-11.9729	0.0640162	0.306604	-132.409	30.1998	-14.125	0.0299745	0.262117	-230.014	105.536	-14.6387	0.153633	0.273091	-256.325	85.4127	-7.71258	0.10103	0.207046	-268.207	170.662	-6.4777	0.303571	0.28729	-255.921	162.781	-15.0384	0.159448	0.294413	-209.025	96.0202	-1.72054	0.194581	0.167796	-264.812	108.605	-12.282	0.149448	0.261209	44	17.6	-230.254	95.7197	-10.587
-244.41	30.7008	-11.5876	0.0191103	0.283208	-230.764	68.3016	-12.0104	0.0657008	0.310984	-137.038	30.2226	-15.0414	0.0264668	0.266901	-229.987	109.547	-14.7656	0.150246	0.280788	-254.668	89.1747	-7.78942	0.104354	0.215686	-264.422	168.503	-6.4546	0.303309	0.28729	-249.732	158.958	-14.5085	0.160075	0.290019	-204.79	98.1388	-1.33607	0.195505	0.166872	-256.478	107.931	-11.7891	0.153021	0.260234	45	18	-229.57	96.754	-10.5767
-249.946	32.2206	-11.7016	0.0200501	0.277882	-231.5	70.9182	-12.0392	0.0683962	0.311995	-146.364	30.2454	-15.964	0.0258291	0.270089	-230.029	113.558	-14.8382	0.15117	0.287254	-253.011	92.9367	-7.8803	0.109339	0.223662	-261.453	166.344	-6.44282	0.303046	0.287553	-243.542	156.213	-14.0193	0.159761	0.288763	-200.554	101.094	-1.01272	0.194889	0.168719	-249.731	107.256	-11.2925	0.154321	0.257635	46	18.4	-229.235	97.9149	-10.563
-256.409	33.7404	-11.8142	0.0216165	0.273496	-232.236	73.5348	-12.0768	0.0714286	0.304582	-156.241	30.2682	-16.8933	0.0258291	0.273916	-231.407	118.704	-14.9286	0.154865	0.292488	-251.354	96.6987	-7.96148	0.113327	0.231306	-258.484	164.186	-6.39376	0.303309	0.286502	-237.352	153.468	-13.5102	0.161017	0.288763	-196.319	104.053	-0.688723	0.195505	0.172722	-243.318	106.582	-10.8	0.15692	0.25796	47	18.8	-229.043	99.3886	-10.5499
-263.322	35.2601	-11.9318	0.0228697	0.262218	-232.972	76.1514	-12.0978	0.0758086	0.297507	-166.946	31.2372	-17.8169	0.0267857	0.277105	-232.784	125.013	-15.027	0.157943	0.298953	-249.697	100.461	-8.03127	0.125623	0.240611	-255.515	162.027	-6.40066	0.301208	0.287553	-231.163	150.723	-13.0211	0.163528	0.290019	-192.083	107.633	-0.307997	0.195813	0.1758	-236.905	105.992	-10.3151	0.161468	0.255036	48	19.2	-229.211	101.349	-10.5371
-270.236	36.7799	-12.0474	0.0234962	0.25188	-233.708	78.768	-12.121	0.0791779	0.285377	-178.079	35.0423	-18.7298	0.0299745	0.27838	-234.161	131.322	-15.1262	0.159791	0.307266	-248.04	104.223	-8.12939	0.133932	0.246926	-253.346	160.079	-6.37805	0.299632	0.286765	-226.886	148.955	-12.5029	0.168864	0.289077	-187.848	111.339	0.0346079	0.197968	0.177956	-230.597	105.629	-9.83384	0.164392	0.250812	49	19.6	-229.958	103.639	-10.5218
-277.149	38.2997	-12.1652	0.0238095	0.243421	-234.443	81.3846	-12.165	0.0811995	0.277291	-190.559	38.8474	-19.6449	0.0347577	0.28125	-236.341	137.631	-15.2148	0.163177	0.315579	-246.383	107.985	-8.19303	0.138917	0.252576	-251.541	158.755	-6.37183	0.298057	0.285977	-222.773	148.169	-11.9896	0.17828	0.287508	-183.612	116.41	0.390949	0.198276	0.18165	-226.816	105.267	-9.34285	0.166667	0.239116	50	20	-230.947	106.038	-10.5108
-284.063	40.304	-12.2927	0.0263158	0.235589	-235.179	84.2375	-12.1946	0.0838949	0.273922	-204.406	42.6524	-20.563	0.0401786	0.283801	-239.341	143.94	-15.3131	0.166564	0.321736	-244.726	111.747	-8.28437	0.144566	0.259887	-249.736	157.431	-6.34272	0.294118	0.28834	-218.661	147.437	-11.4918	0.179849	0.286252	-179.377	121.69	0.747178	0.200431	0.184729	-223.034	104.905	-8.86171	0.17089	0.235867	51	20.4	-225.51	101.389	-10.5555
-277.399	37.0571	-12.6015	0.0253759	0.250313	-222.276	81.2786	-12.8967	0.0822102	0.291442	-209.621	42.4517	-20.9422	0.033801	0.286352	-235.169	139.21	-15.0503	0.164101	0.320813	-241.346	111.52	-8.38001	0.148222	0.260552	-243.95	149.747	-6.23704	0.292279	0.279149	-213.113	139.733	-10.9079	0.183616	0.282172	-172.647	115.715	0.668488	0.197968	0.181342	-214.071	95.7908	-8.65236	0.165042	0.231319	52	20.8	-220.163	97.0795	-10.6007
-270.735	34.9725	-12.9125	0.0238095	0.261278	-209.584	79.0487	-13.5802	0.0842318	0.306267	-214.835	42.2509	-21.3379	0.0334821	0.289541	-230.996	134.481	-14.7667	0.163485	0.313424	-237.965	111.294	-8.47645	0.155866	0.263543	-238.443	142.081	-6.16794	0.288603	0.273109	-207.879	132.082	-10.3426	0.185813	0.278092	-165.918	110.058	0.6112	0.194889	0.17734	-205.109	87.4468	-8.43291	0.160494	0.226121	53	21.2	-215.218	93.1782	-10.6564
-264.071	34.4985	-13.2308	0.0250627	0.271617	-197.549	76.8189	-14.2717	0.0859164	0.311995	-220.634	42.0669	-21.7188	0.0341199	0.293048	-227.428	129.752	-14.5	0.161638	0.311884	-234.585	111.068	-8.59308	0.160186	0.266201	-233.389	135.125	-6.09071	0.282038	0.271008	-202.986	124.649	-9.7723	0.188324	0.272128	-159.189	105.067	0.522235	0.19181	0.174877	-197.132	79.5581	-8.2521	0.159194	0.221572	54	21.6	-210.459	89.52	-10.708
-257.407	34.9194	-13.5386	0.0256892	0.280702	-185.514	74.589	-14.9496	0.0950135	0.321429	-226.547	42.2713	-22.1039	0.0347577	0.297194	-224.265	125.022	-14.2402	0.156096	0.313116	-231.205	110.841	-8.7073	0.159854	0.269525	-229.083	128.169	-6.01924	0.27416	0.268382	-198.094	117.288	-9.20563	0.188638	0.268362	-152.46	100.077	0.441914	0.188732	0.17303	-189.561	72.5029	-8.0495	0.155296	0.216049	55	22	-205.735	86.161	-10.7496
-250.743	36.0412	-13.8362	0.0266291	0.287281	-173.655	72.3592	-15.6195	0.102426	0.328504	-232.459	43.6375	-22.4935	0.0357143	0.297513	-221.103	120.293	-13.9717	0.154865	0.314655	-227.824	110.727	-8.80439	0.163509	0.275507	-224.911	121.213	-5.9417	0.266807	0.264968	-193.201	109.926	-8.6183	0.190207	0.260515	-145.731	95.0869	0.395108	0.185961	0.17303	-181.989	66.1655	-7.85595	0.151722	0.210526	56	22.4	-201.068	83.3161	-10.7954
-244.079	37.3838	-14.1403	0.0316416	0.286028	-162.015	71.3122	-16.3055	0.105458	0.331873	-238.372	46.2932	-22.886	0.0357143	0.299745	-218.238	115.564	-13.7063	0.152709	0.315579	-224.444	110.628	-8.892	0.162512	0.285477	-220.739	114.667	-5.87009	0.259191	0.262342	-188.308	102.564	-8.04076	0.194915	0.256748	-139.001	90.5658	0.343935	0.181958	0.171182	-174.417	60.8668	-7.66177	0.144899	0.206303	57	22.8	-196.45	80.7928	-10.8407
-237.415	39.4088	-14.4556	0.0344612	0.283521	-150.375	70.4237	-16.9779	0.110512	0.333558	-244.285	48.9488	-23.2765	0.0353954	0.300064	-215.81	110.834	-13.4004	0.150554	0.312808	-221.063	110.529	-8.99583	0.163842	0.29445	-216.568	109.012	-5.79471	0.251313	0.260504	-183.416	95.2024	-7.48832	0.196171	0.249529	-132.272	86.7712	0.266241	0.177032	0.168411	-166.846	56.0043	-7.4431	0.138402	0.205003	58	23.2	-192.561	78.3218	-10.8905
-231.955	41.4338	-14.7527	0.0363409	0.280388	-142.443	69.9389	-17.6844	0.114555	0.33659	-250.198	51.6045	-23.6747	0.0360332	0.30102	-213.382	106.105	-13.1295	0.147783	0.312808	-217.683	110.431	-9.10202	0.163509	0.303755	-212.396	103.424	-5.73771	0.240546	0.265756	-179.271	87.8407	-6.89791	0.200565	0.245135	-125.543	82.9766	0.203656	0.172414	0.16564	-160.173	51.1418	-7.23905	0.127031	0.203704	59	23.6	-190.729	76.264	-10.9352
-227.297	43.4588	-15.0634	0.0388471	0.275063	-150.324	70.4805	-18.3923	0.120283	0.339623	-256.346	54.2601	-24.0632	0.0366709	0.299107	-211.151	101.375	-12.8246	0.150554	0.307266	-214.303	110.332	-9.19373	0.163509	0.313393	-208.224	99.3747	-5.64332	0.237658	0.267595	-175.472	80.479	-6.32583	0.204959	0.240427	-118.814	80.23	0.135471	0.168719	0.161022	-154.626	46.3854	-7.04586	0.119233	0.203704	60	24	-189.064	74.47	-10.9903
-222.638	46.3436	-15.3651	0.0410401	0.27193	-158.717	71.2313	-19.04	0.124663	0.338275	-262.704	56.9158	-24.4612	0.0382653	0.298469	-209.705	96.6461	-12.5767	0.146244	0.301416	-210.922	110.233	-9.30575	0.164839	0.319708	-204.052	95.325	-5.58824	0.232405	0.269958	-171.673	73.1173	-5.77948	0.210609	0.23258	-112.085	77.7014	0.0585962	0.163793	0.155788	-149.078	42.7166	-6.85446	0.118908	0.205003	61	24.4	-184.419	70.1908	-11.0105
-214.27	44.5697	-15.703	0.0391604	0.277569	-157.247	62.5213	-19.5218	0.121294	0.341981	-258.606	52.3201	-24.2541	0.0350765	0.302296	-206.181	93.7942	-12.1799	0.141933	0.295567	-205.877	107.657	-9.3261	0.162512	0.321702	-199.06	94.6446	-5.41974	0.229779	0.262605	-170.101	67.3432	-5.69601	0.204959	0.230383	-107.264	70.9464	-0.0871559	0.156404	0.144089	-141.166	37.9205	-6.90686	0.111111	0.203379	62	24.8	-179.965	66.1665	-11.0289
-205.901	43.5151	-16.0271	0.0382206	0.283521	-156.514	54.6163	-19.9965	0.119272	0.341644	-255.491	47.7241	-24.0403	0.0334821	0.303571	-202.656	90.9424	-11.7999	0.140086	0.291564	-200.832	105.082	-9.33962	0.157195	0.322034	-194.068	93.9643	-5.2495	0.227679	0.256303	-168.529	61.7651	-5.62767	0.20339	0.229441	-102.443	64.7653	-0.228387	0.146244	0.137007	-133.254	33.1243	-6.95131	0.100715	0.207277	63	25.2	-175.747	62.2525	-11.0482
-197.533	42.727	-16.3552	0.0369674	0.288847	-155.811	47.4377	-20.4726	0.112534	0.345013	-252.673	43.1281	-23.8276	0.033801	0.306441	-199.132	88.0905	-11.4141	0.138239	0.286946	-195.787	102.506	-9.3549	0.15221	0.325025	-189.075	93.2841	-5.10327	0.22479	0.251576	-168.206	56.1869	-5.5381	0.197112	0.226303	-97.6215	58.5843	-0.360965	0.141318	0.131773	-125.883	28.328	-7.00711	0.0938921	0.210851	64	25.6	-171.713	59.4314	-11.0673
-189.699	42.5885	-16.6624	0.0366541	0.291667	-155.277	44.2577	-20.9475	0.106806	0.34535	-249.855	38.5322	-23.608	0.0325255	0.309311	-195.608	85.2387	-11.0279	0.139778	0.278941	-190.742	99.9305	-9.37831	0.149219	0.326354	-184.265	92.9663	-4.94434	0.226366	0.252101	-168.19	50.6087	-5.45766	0.19209	0.220653	-92.8005	53.0977	-0.495902	0.129618	0.122229	-118.985	27.6626	-7.08352	0.0860949	0.208577	65	26	-167.946	57.0057	-11.0856
-182.249	42.6129	-16.9791	0.0357143	0.295739	-155.358	43.4493	-21.4207	0.100741	0.34872	-247.037	33.9362	-23.3973	0.0296556	0.311224	-192.083	82.3868	-10.6531	0.140394	0.272167	-185.697	97.3548	-9.40252	0.143569	0.326687	-179.553	92.6724	-4.76543	0.22584	0.246849	-168.174	45.0306	-5.38186	0.185185	0.216259	-87.9794	48.3133	-0.64597	0.12069	0.114224	-113.381	27.2954	-7.12426	0.0808967	0.207602	66	26.4	-164.608	55.6329	-11.1118
-176.278	42.9463	-17.3022	0.0357143	0.295739	-155.44	42.9303	-21.903	0.0943396	0.348046	-244.219	29.5525	-23.183	0.0293367	0.311543	-188.559	79.6923	-10.2795	0.141318	0.266318	-180.652	94.7792	-9.42808	0.139914	0.326687	-174.84	92.3784	-4.60469	0.227941	0.244223	-168.158	46.9146	-5.32854	0.177966	0.209981	-83.6489	44.5742	-0.787751	0.112993	0.109298	-109.681	26.9282	-7.18911	0.0737492	0.203379	67	26.8	-162.81	54.7702	-11.1305
-178.114	43.2798	-17.6267	0.0344612	0.296992	-156.162	42.5767	-22.3715	0.0916442	0.350067	-242.623	27.2283	-22.9826	0.0267857	0.313138	-185.094	77.5415	-9.88628	0.144704	0.258313	-175.975	92.9868	-9.44366	0.135261	0.328681	-170.128	92.0845	-4.43802	0.229779	0.240809	-168.143	48.9067	-5.26026	0.16447	0.205587	-79.4874	41.7666	-0.922065	0.107451	0.105296	-109.561	26.561	-7.24337	0.0669266	0.204353	68	27.2	-161.558	54.346	-11.1527
-181.253	43.6132	-17.9432	0.0341479	0.297619	-156.907	42.5411	-22.8478	0.0886119	0.352426	-241.245	27.5958	-22.7686	0.0264668	0.314094	-181.938	75.3907	-9.53087	0.149015	0.252155	-171.842	91.6086	-9.45566	0.129944	0.333001	-165.415	91.7906	-4.27842	0.233456	0.238708	-168.127	51.1432	-5.20041	0.155367	0.197426	-75.3259	39.2373	-1.0568	0.100677	0.102833	-111.972	26.1938	-7.29282	0.0640026	0.205653	69	27.6	-160.721	54.7613	-11.1733
-186.557	43.9467	-18.2866	0.0338346	0.299185	-157.722	43.1837	-23.3189	0.0852426	0.3531	-239.866	31.0578	-22.545	0.0258291	0.313457	-178.923	73.2399	-9.14852	0.152709	0.246921	-167.708	90.2304	-9.46852	0.12662	0.333001	-160.858	92.0042	-4.12281	0.23188	0.239233	-168.111	53.3797	-5.13847	0.146893	0.184871	-71.1644	37.7477	-1.18646	0.0975985	0.106527	-115.579	28.0621	-7.3446	0.0636777	0.206953	70	28	-160.136	55.5592	-11.1972
-191.873	44.2801	-18.5944	0.0344612	0.298872	-158.809	44.7893	-23.8057	0.0815364	0.356469	-238.89	34.5198	-22.3402	0.0232781	0.313776	-175.951	71.3182	-8.77044	0.156712	0.247229	-163.839	88.8522	-9.49795	0.123629	0.333001	-156.442	92.3227	-3.95881	0.233193	0.238445	-168.095	55.6161	-5.08685	0.136221	0.179849	-67.421	37.3815	-1.33695	0.100062	0.1133	-119.902	30.9531	-7.38346	0.0643275	0.210201	71	28.4	-156.11	52.9878	-10.9815
-189.677	41.7151	-18.3603	0.0319549	0.298872	-156.141	42.7169	-23.4886	0.0798518	0.356806	-236.318	34.1265	-21.8245	0.0248724	0.30963	-174.792	68.3239	-8.51862	0.15548	0.241687	-161.443	84.4971	-9.38797	0.119973	0.332669	-149.968	90.5214	-3.90446	0.22479	0.232931	-159.487	52.4585	-4.9939	0.121783	0.171375	-63.3327	33.9878	-1.26547	0.0972906	0.0994458	-113.831	28.5426	-7.08959	0.0640026	0.208577	72	28.8	-152.223	50.7013	-10.7687
-187.481	39.3207	-18.1185	0.0303885	0.296679	-153.651	40.7775	-23.1792	0.0754717	0.356469	-233.745	33.7331	-21.3184	0.0274235	0.308036	-173.632	65.519	-8.25226	0.151478	0.2383	-159.463	80.1419	-9.30724	0.115985	0.330342	-143.984	88.72	-3.85537	0.21875	0.22584	-150.879	49.3007	-4.8892	0.109542	0.169178	-59.2445	32.6614	-1.19481	0.0948276	0.085899	-107.925	26.1378	-6.80336	0.0610786	0.206628	73	29.2	-148.757	48.9669	-10.5504
-185.284	37.3634	-17.874	0.0294486	0.296679	-152.568	38.9038	-22.8693	0.0717655	0.358827	-231.173	33.3397	-20.8103	0.0328444	0.303571	-172.551	62.714	-8.00025	0.144397	0.235222	-158.77	75.971	-9.20681	0.11233	0.328016	-138.008	86.9186	-3.77214	0.208771	0.217437	-142.272	46.1428	-4.78546	0.0932203	0.16855	-55.1561	32.9575	-1.13256	0.0917488	0.0877463	-103.028	26.391	-6.50325	0.060104	0.205653	74	29.6	-145.564	47.383	-10.3362
-183.088	35.6447	-17.6339	0.0285088	0.296053	-151.694	37.4233	-22.5404	0.0690701	0.361186	-228.6	32.9463	-20.3022	0.0366709	0.302934	-171.914	59.9091	-7.75017	0.1367	0.227833	-158.077	72.4665	-9.11759	0.108342	0.327019	-132.628	85.1172	-3.71461	0.195903	0.210609	-134.311	42.985	-4.69927	0.0897677	0.169805	-51.6374	33.2536	-1.07025	0.08867	0.0960591	-98.1318	26.7016	-6.1971	0.060104	0.202404	75	30	-143.139	45.9263	-10.121
-180.891	34.3388	-17.3924	0.0266291	0.294486	-151.072	36.1876	-22.239	0.0663747	0.360512	-226.028	32.6189	-19.8262	0.0401786	0.301658	-171.277	57.1041	-7.49896	0.131773	0.22383	-158.365	68.9621	-8.99929	0.105683	0.323363	-128.466	83.3158	-3.65355	0.183298	0.208246	-126.531	40.247	-4.57531	0.0881984	0.16855	-48.3306	33.5497	-1.00105	0.0880542	0.117303	-97.2911	27.0122	-5.90341	0.0607537	0.20013	76	30.4	-141.135	44.9957	-9.90921
-178.695	33.212	-17.158	0.0260025	0.29386	-151.025	34.952	-21.9337	0.0660377	0.360175	-223.455	36.4228	-19.3098	0.0440051	0.300702	-170.64	54.2992	-7.24792	0.126847	0.216441	-159.088	65.6058	-8.89985	0.100033	0.32004	-125.928	81.5145	-3.61059	0.178571	0.20667	-118.752	37.7257	-4.47982	0.08914	0.168236	-45.7538	33.8459	-0.939083	0.0855911	0.126539	-96.8823	27.3835	-5.60415	0.0623782	0.193632	77	30.8	-139.748	44.4159	-9.69475
-176.506	32.279	-16.9166	0.0247494	0.29292	-151.207	33.7873	-21.6146	0.0623315	0.360512	-220.883	41.0092	-18.8075	0.0459184	0.298788	-170.002	51.8815	-6.97827	0.125924	0.214594	-159.916	62.9189	-8.80559	0.0980392	0.317714	-125.725	80.2609	-3.55806	0.174632	0.210084	-112.131	35.2045	-4.40311	0.0944758	0.170747	-44.3783	34.142	-0.864222	0.08867	0.131158	-96.9824	28.2602	-5.30477	0.0630279	0.189084	78	31.2	-138.801	44.2863	-9.47692
-174.697	31.6059	-16.6857	0.0219298	0.292293	-151.59	32.6758	-21.2978	0.059973	0.359838	-218.31	46.5874	-18.3034	0.0497449	0.296237	-169.365	50.4712	-6.72555	0.129002	0.212438	-160.798	60.2613	-8.70278	0.0960452	0.314058	-126.461	80.6343	-3.49461	0.175683	0.20667	-106.757	32.6832	-4.29569	0.104206	0.166353	-44.1497	34.4381	-0.792074	0.105603	0.130234	-97.0826	29.2196	-4.99471	0.0623782	0.182911	79	31.6	-138.524	44.2499	-9.26341
-172.887	30.9329	-16.4466	0.0222431	0.29104	-151.972	31.5642	-20.9849	0.0569407	0.355121	-215.738	52.1655	-17.7967	0.0529337	0.293367	-168.879	49.3905	-6.47357	0.132081	0.20782	-162.338	57.8353	-8.61478	0.0943835	0.309405	-128.225	81.0077	-3.43975	0.178571	0.209821	-104.714	30.4396	-4.19874	0.112053	0.165097	-44.6015	34.7343	-0.718294	0.116995	0.134236	-97.361	30.1789	-4.69738	0.0633528	0.176413	80	32	-138.924	45.2152	-9.04338
-171.078	30.2598	-16.2042	0.0203634	0.2901	-152.354	30.6557	-20.6684	0.0535714	0.350741	-213.165	58.0179	-17.2862	0.0567602	0.290497	-168.799	51.8758	-6.22242	0.137007	0.203202	-164.211	55.4092	-8.51532	0.0963775	0.304752	-131.735	81.391	-3.34027	0.185399	0.212973	-105.815	33.1586	-4.09847	0.116447	0.170119	-45.4966	35.0304	-0.660028	0.12931	0.132389	-97.6595	31.1383	-4.39514	0.0669266	0.169591	81	32.4	-135.031	43.5305	-8.89328
-168.823	27.4154	-15.965	0.0181704	0.287907	-151.022	30.1568	-20.5087	0.055593	0.353437	-210.27	58.0568	-16.975	0.0558036	0.288584	-161.574	50.4866	-6.18241	0.126539	0.196429	-159.87	49.4926	-8.45262	0.0884015	0.299103	-129.145	77.9592	-3.26551	0.180672	0.20667	-99.0753	34.0876	-3.99884	0.112994	0.165411	-42.9972	33.0181	-0.555752	0.131773	0.128695	-92.4985	31.101	-4.13566	0.0633528	0.163093	82	32.8	-131.169	42.2206	-8.74812
-166.568	24.5708	-15.7104	0.0156642	0.285401	-149.904	29.6644	-20.3567	0.0586253	0.359501	-207.376	58.0953	-16.6879	0.0580357	0.282526	-154.356	49.0972	-6.12136	0.115456	0.187808	-155.593	46.7639	-8.40775	0.0830841	0.290462	-126.555	74.537	-3.21595	0.175683	0.203519	-92.3353	35.0164	-3.91085	0.110483	0.165725	-40.4975	31.0057	-0.456221	0.137931	0.125308	-87.3374	31.2344	-3.86596	0.0610786	0.160494	83	33.2	-127.721	41.5046	-8.59893
-164.313	22.2681	-15.4585	0.0147243	0.283521	-149.065	29.5643	-20.2019	0.0613208	0.361523	-204.977	58.1338	-16.3738	0.0605867	0.27838	-148.297	47.7077	-6.0666	0.109298	0.180727	-151.661	48.1907	-8.36293	0.0774344	0.284812	-125.146	71.1149	-3.1394	0.171744	0.19354	-85.767	36.0387	-3.8183	0.107031	0.166667	-38.089	28.9933	-0.355406	0.142857	0.124076	-82.1761	31.5297	-3.6135	0.0581546	0.160169	84	33.6	-124.662	40.9671	-8.45019
-162.059	20.0876	-15.2107	0.012218	0.281015	-148.884	30.76	-20.0458	0.0643531	0.367925	-202.731	58.1723	-16.081	0.0634566	0.272959	-142.239	46.3183	-6.01095	0.102525	0.17734	-147.728	49.6175	-8.30234	0.0724493	0.28016	-124.942	67.6928	-3.06517	0.169643	0.184086	-79.7937	37.2497	-3.72218	0.105775	0.167608	-36.0879	26.9809	-0.26463	0.144089	0.123461	-77.4962	31.825	-3.34893	0.0558804	0.15627	85	34	-122.303	40.449	-8.29407
-159.804	17.9071	-14.9598	0.0103383	0.280702	-149.109	31.9557	-19.8862	0.0670485	0.370957	-200.834	58.2108	-15.7713	0.0634566	0.268176	-137.379	44.9288	-5.96483	0.102833	0.179803	-144.36	51.0443	-8.23024	0.069126	0.274842	-124.738	64.2707	-2.96315	0.170168	0.176733	-75.4592	38.6353	-3.61884	0.102009	0.169178	-36.0604	24.9685	-0.160726	0.143473	0.125	-72.9856	32.1202	-3.09159	0.0532814	0.153671	86	34.4	-120.437	39.931	-8.14725
-157.549	15.7266	-14.7091	0.00845865	0.279449	-149.769	33.1514	-19.7331	0.0710916	0.371968	-199.07	58.2493	-15.4668	0.0663265	0.26148	-132.668	43.5393	-5.90589	0.106219	0.185653	-141.814	52.4711	-8.18897	0.0654703	0.266866	-125.215	60.8485	-2.88701	0.167279	0.174895	-72.7202	40.0209	-3.52502	0.101695	0.172944	-36.6501	22.9561	-0.0671515	0.143165	0.127463	-68.475	32.4155	-2.84219	0.0516569	0.154646	87	34.8	-118.901	39.903	-7.9974
-155.295	15.2006	-14.4622	0.00814536	0.277569	-150.428	34.3637	-19.5729	0.0744609	0.375337	-197.307	58.4048	-15.17	0.0672832	0.25287	-128.941	42.247	-5.83979	0.110222	0.190887	-140.084	53.8979	-8.12406	0.0614822	0.257228	-126.022	57.4264	-2.8299	0.165966	0.174107	-70.7885	41.4065	-3.43468	0.100439	0.177024	-37.2811	23.4688	0.0345631	0.143781	0.125	-63.9643	32.7108	-2.57767	0.0523067	0.150422	88	35.2	-117.688	40.2606	-7.84644
-153.239	15.1081	-14.2101	0.00689223	0.277569	-151.353	35.5889	-19.4171	0.0771563	0.377022	-195.543	59.0385	-14.8687	0.0688776	0.248724	-125.67	41.4275	-5.78992	0.116379	0.192118	-139.416	55.3247	-8.06689	0.0588235	0.250914	-126.829	54.5298	-2.75243	0.162027	0.16833	-69.7745	42.7921	-3.33742	0.101695	0.174513	-37.9121	25.5301	0.13716	0.144089	0.120074	-59.4537	33.0061	-2.3126	0.0610786	0.151722	89	35.6	-117.147	40.6397	-7.69567
-151.558	15.0156	-13.957	0.0056391	0.278195	-152.495	36.8141	-19.2566	0.0798518	0.378369	-193.779	59.6722	-14.5666	0.0720663	0.240434	-123.177	40.6081	-5.73835	0.125	0.19335	-140.576	56.7515	-7.99255	0.0574942	0.245597	-128.414	51.8256	-2.68061	0.167017	0.167017	-70.0803	44.1777	-3.24524	0.101067	0.171689	-38.9128	27.5913	0.233969	0.149938	0.11484	-55.3326	33.3014	-2.05803	0.0786225	0.149773	90	36	-117.389	41.4895	-7.54682
-149.877	14.923	-13.7069	0.00877193	0.276942	-153.637	38.0393	-19.1022	0.083221	0.379043	-192.291	60.4637	-14.2637	0.0758929	0.236926	-122.455	40.0325	-5.6848	0.131466	0.193966	-142.565	58.1783	-7.95628	0.0578265	0.242606	-131.481	51.1465	-2.59524	0.174632	0.167542	-71.3542	45.5633	-3.1453	0.103578	0.167922	-40.7855	29.6526	0.324129	0.149938	0.1133	-52.0593	35.4063	-1.79101	0.10039	0.151722	91	36.4	-114.776	39.3623	-7.45478
-146.598	14.7941	-13.5935	0.0093985	0.276316	-151.602	36.9438	-18.8471	0.0781671	0.379717	-191.163	59.7456	-14.072	0.0717474	0.237883	-117.435	38.3206	-5.65106	0.125308	0.192734	-135.325	53.1829	-7.73757	0.0598205	0.235294	-127.117	49.0864	-2.5472	0.166754	0.161765	-70.4829	41.3556	-3.06515	0.0957313	0.1629	-40.3972	28.7543	0.334067	0.142857	0.107143	-52.8659	32.0774	-1.91353	0.091293	0.151397	92	36.8	-112.399	37.7587	-7.37005
-143.466	14.6651	-13.4796	0.0100251	0.277882	-150.985	38.0862	-18.5865	0.0761456	0.377695	-190.034	59.1853	-13.8746	0.0685587	0.236926	-112.611	37.0626	-5.63975	0.117303	0.191195	-128.084	48.5049	-7.54706	0.0611499	0.230974	-122.753	47.1745	-2.51943	0.159139	0.159139	-69.9722	37.1479	-2.99776	0.0900816	0.155995	-40.0088	28.1093	0.341037	0.130234	0.102217	-53.6727	29.8923	-2.02674	0.0890188	0.147823	93	37.2	-110.363	36.2943	-7.28464
-140.334	14.5361	-13.3695	0.0100251	0.281642	-150.368	39.3513	-18.3437	0.0724394	0.375337	-188.906	58.6249	-13.6881	0.0660077	0.237245	-108.732	35.8827	-5.62518	0.11053	0.189963	-122.659	44.2659	-7.34721	0.0611499	0.226321	-118.462	45.5429	-2.47505	0.158088	0.15625	-69.5107	32.9402	-2.9216	0.0847458	0.146893	-39.8189	27.4644	0.351969	0.113916	0.0932882	-54.4794	28.0401	-2.14348	0.0786225	0.144899	94	37.6	-109.399	35.0517	-7.19115
-137.203	14.4071	-13.2546	0.0106516	0.281955	-150.561	40.7293	-18.0823	0.0690701	0.371631	-187.852	58.0646	-13.4877	0.0605867	0.239158	-108.095	35.2507	-5.59974	0.102217	0.188424	-121.972	40.43	-7.13451	0.0674643	0.222001	-114.639	44.0945	-2.4272	0.157563	0.156513	-69.0823	28.7325	-2.84738	0.0787822	0.141243	-39.905	27.3159	0.363062	0.102525	0.0862069	-55.2862	26.4405	-2.24995	0.0773229	0.14165	95	38	-109.051	34.0522	-7.10253
-134.071	14.2782	-13.1393	0.0106516	0.281328	-151.215	42.3025	-17.8229	0.0667116	0.36624	-187.34	57.5042	-13.2973	0.0605867	0.23852	-110.069	34.7011	-5.58607	0.0985222	0.191195	-122.675	36.5942	-6.92337	0.0737787	0.212031	-110.815	42.6461	-2.38059	0.159664	0.156513	-68.9594	25.4778	-2.77597	0.0772128	0.135279	-40.22	27.8971	0.365512	0.0889778	0.0763547	-56.093	25.0683	-2.36276	0.0721248	0.138402	96	38.4	-109.044	33.7805	-7.01429
-131.067	14.4251	-13.0303	0.0112782	0.282895	-152.701	43.8757	-17.5722	0.0616577	0.364555	-186.827	56.9439	-13.116	0.0625	0.237564	-113.267	34.5737	-5.56157	0.0969828	0.190579	-123.668	35.2074	-6.70595	0.0810901	0.209704	-107.115	41.3006	-2.33295	0.163078	0.163078	-69.1863	23.1679	-2.71295	0.0768989	0.136535	-40.6698	28.5751	0.374549	0.0791256	0.0665025	-56.8997	25.9554	-2.47124	0.0695257	0.136127	97	38.8	-109.493	33.8783	-6.92721
-128.182	14.7852	-12.9192	0.0119048	0.280702	-155.138	45.4617	-17.3066	0.0582884	0.362534	-186.315	56.3835	-12.9349	0.0647321	0.238202	-117.054	34.4462	-5.55829	0.0997537	0.19181	-125.653	34.823	-6.48877	0.0857428	0.206713	-104.858	40.0475	-2.28772	0.16833	0.172794	-69.4132	21.4289	-2.64381	0.0740741	0.135279	-41.1197	29.4286	0.381847	0.0745074	0.0591133	-57.7065	28.1005	-2.58742	0.0662768	0.138402	98	39.2	-110.361	34.3709	-6.83847
-125.644	15.1453	-12.8068	0.012218	0.274436	-157.971	47.2048	-17.0427	0.0566038	0.359164	-185.803	55.8232	-12.7369	0.0663265	0.238839	-122.052	34.3724	-5.53447	0.104988	0.189963	-128.725	34.4387	-6.27741	0.0910602	0.206713	-103.219	38.7945	-2.23404	0.179622	0.179884	-69.64	23.0313	-2.59149	0.0747018	0.135279	-41.5695	30.2822	0.387549	0.0735837	0.0541872	-58.6247	30.2455	-2.71007	0.0682261	0.14165	99	39.6	-111.559	35.7031	-6.7519
-123.325	15.5055	-12.6924	0.0125313	0.267231	-161.811	48.9479	-16.7911	0.0552561	0.355458	-185.291	55.2628	-12.5534	0.0679209	0.236926	-127.108	34.6503	-5.51348	0.112069	0.186576	-131.797	35.9675	-6.0678	0.0923895	0.21336	-102.893	42.2487	-2.20068	0.186187	0.184349	-70.1863	25.2188	-2.50723	0.0762712	0.136849	-42.0194	31.1357	0.387936	0.0791256	0.054803	-59.5977	32.3905	-2.82893	0.0695257	0.148473	100	40	-112.933	37.3452	-6.66288
-121.006	15.8997	-12.5756	0.0125313	0.259712	-165.652	50.691	-16.5509	0.0549191	0.34872	-184.779	54.7025	-12.3578	0.0685587	0.237883	-132.163	34.9282	-5.48032	0.118227	0.187808	-134.868	39.1553	-5.86478	0.0997009	0.220339	-104.068	46.7993	-2.15281	0.193015	0.188025	-70.8208	27.4063	-2.44177	0.084118	0.139674	-42.4692	31.9892	0.402062	0.0825123	0.0554187	-60.5705	34.5354	-2.94399	0.0737492	0.154321	101	40.4	-109.351	35.5317	-6.51547
-117.212	15.4541	-12.4375	0.0100251	0.260652	-162.461	50.2995	-16.207	0.0566038	0.348383	-177.589	55.0913	-12.2165	0.0656888	0.240434	-127.944	32.1818	-5.39134	0.112069	0.182882	-130.575	39.2888	-5.61569	0.0943835	0.215022	-101.448	43.2049	-2.10005	0.187763	0.185137	-68.7774	25.3397	-2.37539	0.0831764	0.13371	-39.9402	29.1835	0.500067	0.072968	0.0474138	-58.2122	29.7418	-2.7957	0.0695257	0.148798	102	40.8	-106.443	34.0618	-6.36329
-118.684	15.0085	-12.2976	0.0075188	0.262218	-159.271	49.9079	-15.8563	0.0559299	0.348383	-170.4	55.4802	-12.0517	0.0605867	0.242028	-123.993	29.4355	-5.28284	0.107759	0.177956	-126.282	39.4222	-5.37454	0.0897308	0.202393	-99.0136	41.0462	-2.04501	0.182248	0.183298	-66.7339	23.2731	-2.30262	0.0800377	0.129316	-37.5848	26.3778	0.594547	0.0578818	0.0409483	-56.0279	26.6049	-2.65353	0.0695257	0.141975	103	41.2	-103.805	33.541	-6.20982
-121.204	14.563	-12.168	0.00720551	0.264724	-156.081	49.5164	-15.5069	0.0566038	0.346361	-163.211	55.8691	-11.8838	0.0561224	0.248087	-120.809	26.7501	-5.17794	0.103756	0.175493	-121.99	39.5556	-5.12748	0.0874045	0.198737	-96.5793	43.8235	-1.97672	0.175158	0.18041	-64.6904	23.0177	-2.23559	0.0756434	0.126491	-35.2295	23.7063	0.687645	0.0508005	0.0366379	-54.448	25.0677	-2.49956	0.0672515	0.136777	104	41.6	-101.414	33.3282	-6.05558
-123.724	14.1174	-12.0352	0.00657895	0.264724	-152.891	49.1249	-15.1677	0.0576146	0.343329	-156.021	56.258	-11.7388	0.0542092	0.255421	-118.255	24.9793	-5.07325	0.100985	0.173953	-117.697	39.6891	-4.88232	0.0857428	0.194084	-94.3449	46.9124	-1.91248	0.173582	0.178571	-64.0509	23.5985	-2.15679	0.0721908	0.126491	-32.8742	21.3408	0.791249	0.0504926	0.0335591	-52.8681	23.9335	-2.32497	0.0649773	0.133853	105	42	-99.1581	33.4249	-5.90157
-126.244	13.6718	-11.9072	0.00595238	0.262531	-149.966	48.7333	-14.8135	0.0582884	0.340296	-148.832	56.6468	-11.5644	0.0532526	0.265944	-116.296	25.9425	-4.96546	0.0982143	0.174569	-113.404	39.8225	-4.64043	0.0844134	0.192755	-92.2792	50.0014	-1.8436	0.172794	0.178571	-63.5941	24.231	-2.08757	0.0703076	0.124922	-30.5188	18.9753	0.883324	0.0514163	0.0314039	-51.2882	22.7993	-2.1753	0.0653021	0.134178	106	42.4	-97.3366	33.5477	-5.75266
-128.764	13.2262	-11.7739	0.00469925	0.257206	-147.239	48.3417	-14.4664	0.0572776	0.330526	-142.107	57.0357	-11.4003	0.0535714	0.272003	-114.531	26.9058	-4.87646	0.0948276	0.177956	-109.632	39.9559	-4.40117	0.0890661	0.190429	-90.8414	53.0903	-1.78255	0.170956	0.17542	-64.092	24.8636	-2.01199	0.0690521	0.122097	-28.1635	16.8449	0.971281	0.0615764	0.028633	-50.6609	21.6651	-2.03251	0.0688759	0.133203	107	42.8	-95.808	34.1086	-5.59984
-131.731	12.7806	-11.6438	0.00407268	0.253759	-144.512	48.0324	-14.1194	0.0579515	0.324461	-135.623	57.4245	-11.2482	0.0545281	0.272003	-112.771	27.869	-4.78084	0.0899015	0.179187	-106.031	40.0894	-4.15577	0.0990362	0.188102	-89.8103	56.1793	-1.705	0.167542	0.174632	-65.3192	25.4961	-1.93072	0.0684244	0.122411	-25.8082	17.5477	1.07273	0.0671182	0.0267857	-50.666	21.5584	-1.88757	0.0734243	0.137102	108	43.2	-94.7	35.0951	-5.44838
-135	12.335	-11.5013	0.00438596	0.249373	-141.784	47.7273	-13.763	0.0596361	0.319407	-129.684	57.9252	-11.0778	0.0548469	0.274554	-112.918	28.8323	-4.68229	0.0942118	0.181958	-102.574	40.2228	-3.91364	0.107345	0.184114	-88.7792	59.2682	-1.65101	0.162027	0.171218	-66.5464	26.1286	-1.86253	0.0731325	0.121469	-23.4528	20.7499	1.16486	0.0757389	0.0280172	-51.5618	22.6668	-1.74879	0.082846	0.140026	109	43.6	-93.9142	36.3195	-5.29925
-138.268	12.8713	-11.3685	0.00438596	0.241228	-139.057	47.5421	-13.4185	0.0619946	0.31469	-124.143	58.5607	-10.9099	0.0558036	0.275829	-113.065	29.8335	-4.57437	0.0994458	0.185653	-99.4399	41.0479	-3.68824	0.111997	0.175806	-87.7482	62.3571	-1.597	0.163603	0.173845	-68.7989	26.7612	-1.79725	0.0772128	0.121155	-21.155	23.9521	1.26434	0.0822044	0.0264778	-53.5524	23.95	-1.60382	0.0873944	0.143925	110	44	-93.3294	37.8062	-5.14797
-142.106	13.503	-11.2308	0.00407268	0.236529	-136.33	47.741	-13.0779	0.06469	0.309299	-118.893	59.1963	-10.7439	0.0570791	0.273916	-113.212	30.9294	-4.48106	0.0979064	0.186884	-96.4602	42.4034	-3.43514	0.115321	0.168827	-86.7169	65.4458	-1.53773	0.165704	0.174895	-71.2171	27.4539	-1.72608	0.0831764	0.120841	-19.3691	27.154	1.34943	0.0868227	0.0283251	-55.6595	26.4292	-1.44856	0.0964912	0.144899	111	44.4	-90.2006	36.5876	-5.06295
-140.422	13.547	-11.048	0.00438596	0.236842	-131.434	45.5051	-12.9577	0.0643531	0.310984	-112.972	58.8496	-10.5039	0.0558036	0.271046	-107.532	29.4123	-4.35249	0.0877463	0.181034	-94.6736	40.2032	-3.40832	0.111665	0.165503	-83.4263	63.5309	-1.49222	0.157826	0.168592	-69.2664	27.0922	-1.74545	0.0721908	0.115505	-19.0298	24.9973	1.27295	0.0778941	0.023399	-53.0492	26.1508	-1.33141	0.091293	0.137427	112	44.8	-87.2567	35.451	-4.98563
-138.738	13.5909	-10.8608	0.00438596	0.234962	-126.539	43.2692	-12.8398	0.0717655	0.31469	-107.415	58.503	-10.2794	0.0542092	0.268176	-102.728	28.066	-4.2119	0.0785099	0.1758	-92.887	38.003	-3.39346	0.109671	0.159854	-80.5517	61.6161	-1.46929	0.150735	0.163603	-67.3156	26.7305	-1.78236	0.0621469	0.11425	-18.6969	22.8407	1.1823	0.0689655	0.0218596	-50.439	26.4393	-1.21601	0.0844704	0.128005	113	45.2	-84.4015	34.6654	-4.90282
-137.054	13.6349	-10.6649	0.00438596	0.23183	-121.643	41.0334	-12.716	0.0758086	0.317722	-102.173	58.1563	-10.0411	0.0522959	0.265625	-97.9241	26.7197	-4.08848	0.067734	0.172106	-91.1004	36.2294	-3.37552	0.105683	0.154869	-77.6772	59.7012	-1.42178	0.144433	0.160977	-65.6653	26.3688	-1.80982	0.0549278	0.112053	-18.5474	23.0241	1.08626	0.0634236	0.0203202	-47.8288	27.1208	-1.09404	0.079922	0.121183	114	45.6	-82.2894	33.9963	-4.82244
-136.22	13.6789	-10.477	0.00438596	0.22807	-116.747	38.7975	-12.5972	0.0764825	0.320081	-102.531	57.8097	-9.79954	0.0510204	0.260523	-93.1203	25.3734	-3.94059	0.0563424	0.172106	-89.3138	35.3022	-3.36487	0.104354	0.152875	-74.8026	57.7863	-1.4263	0.142332	0.159401	-64.0705	26.0602	-1.82991	0.0505336	0.107659	-18.398	23.356	1.00223	0.0637315	0.0212438	-45.401	27.8024	-0.968742	0.0756985	0.110136	115	46	-80.3629	33.4249	-4.74759
-135.91	13.7228	-10.2924	0.00438596	0.223997	-111.914	36.5616	-12.4763	0.0781671	0.323787	-103.39	57.4631	-9.57973	0.0491071	0.254783	-88.3164	24.0271	-3.80337	0.0474138	0.169335	-87.5272	34.3749	-3.3679	0.102692	0.151878	-72.4354	56.4674	-1.39012	0.138918	0.158351	-62.4758	26.0358	-1.87544	0.0536723	0.106403	-18.2829	23.6879	0.914734	0.0661946	0.0221675	-43.0141	28.4838	-0.857863	0.0734243	0.106563	116	46.4	-78.6349	32.8587	-4.66451
-135.6	13.7668	-10.0988	0.00532581	0.221805	-107.253	34.3257	-12.3542	0.0818733	0.327493	-104.615	57.1164	-9.34711	0.0455995	0.249362	-83.5125	22.6808	-3.66033	0.0471059	0.163793	-86.3503	33.4477	-3.34584	0.103024	0.15221	-70.5086	55.1917	-1.35341	0.140494	0.157038	-60.8811	26.0114	-1.90643	0.0590082	0.107972	-18.3659	24.0228	0.828423	0.0655788	0.023399	-40.6272	29.1653	-0.742857	0.0734243	0.105588	117	46.8	-77.0792	32.5988	-4.58346
-135.291	13.8107	-9.91124	0.00501253	0.220865	-102.591	34.3628	-12.2352	0.0855795	0.330189	-106.184	56.7698	-9.11941	0.0440051	0.245855	-79.5592	21.3345	-3.51996	0.0554187	0.163177	-85.2352	32.9445	-3.33323	0.103689	0.15786	-68.5818	53.9159	-1.33135	0.147321	0.159664	-59.2864	25.987	-1.92678	0.0674827	0.113622	-18.5686	24.4167	0.737773	0.0655788	0.02617	-38.4151	29.8468	-0.611746	0.0724496	0.0997401	118	47.2	-75.9072	32.9219	-4.50416
-134.981	13.8957	-9.72733	0.00532581	0.217732	-97.93	35.5713	-12.1133	0.0862534	0.331536	-107.754	56.4231	-8.88373	0.0436862	0.245217	-75.7963	20.8734	-3.38829	0.0640394	0.165333	-84.1201	32.526	-3.32947	0.10103	0.159854	-66.655	52.6402	-1.2914	0.153887	0.16833	-57.6917	29.0284	-1.95493	0.0721908	0.123352	-20.2751	24.8107	0.652877	0.0652709	0.0310961	-37.9618	30.5283	-0.501885	0.0766732	0.0981157	119	47.6	-75.5644	33.6449	-4.41898
-134.671	13.9897	-9.53662	0.0056391	0.213659	-99.4143	36.7798	-11.9896	0.0882749	0.330526	-109.323	56.0765	-8.66213	0.0455995	0.240753	-72.0334	23.1594	-3.23853	0.0717365	0.166872	-83.1487	32.114	-3.30984	0.100033	0.161515	-64.7283	51.9333	-1.24709	0.162027	0.175158	-56.9332	32.3366	-1.99557	0.0797238	0.137476	-22.2051	25.2046	0.571294	0.0680419	0.0378695	-37.6225	31.2098	-0.362748	0.0789474	0.0984405	120	48	-75.7091	34.4182	-4.34184
-135.075	14.0837	-9.34805	0.00689223	0.209273	-102.107	37.9878	-11.8799	0.0886119	0.321765	-110.892	55.7295	-8.42872	0.0465561	0.239477	-68.2705	25.4449	-3.10407	0.0797414	0.164101	-82.2836	32.1181	-3.2914	0.0990362	0.166168	-63.7889	51.2652	-1.22452	0.172269	0.180935	-57.5472	35.6444	-2.02415	0.0872567	0.146265	-24.1348	25.5985	0.496559	0.072968	0.0474138	-37.2829	31.8912	-0.272297	0.0831709	0.0994152	121	48.4	-72.8695	32.5578	-4.30945
-131.504	13.7298	-9.19675	0.00344612	0.207707	-99.7565	34.5378	-11.8428	0.0825472	0.321765	-106.025	51.451	-8.24883	0.0424107	0.237245	-64.3462	23.5894	-2.99022	0.0766626	0.158251	-79.3053	29.9383	-3.28268	0.0967099	0.163509	-63.1235	49.3178	-1.35367	0.15625	0.173845	-54.9844	34.3568	-1.97435	0.0797238	0.139987	-22.1231	25.2522	0.396964	0.0671182	0.0474138	-34.657	30.8474	-0.292709	0.0786225	0.0968161	122	48.8	-70.0299	30.781	-4.27955
-127.934	13.3759	-9.05703	0.00281955	0.206454	-97.4056	31.8211	-11.8198	0.0771563	0.318059	-101.158	47.1725	-8.05263	0.0420918	0.230548	-60.422	21.7518	-2.86608	0.0705049	0.153633	-76.327	27.7585	-3.28979	0.0927218	0.162512	-62.4582	47.3704	-1.48623	0.142595	0.167542	-52.4216	33.0692	-1.93218	0.0756434	0.136849	-20.1113	24.9058	0.29356	0.0625	0.0489532	-32.0312	29.8037	-0.305762	0.0730994	0.0948668	123	49.2	-67.2787	29.2628	-4.23837
-124.363	13.0221	-8.90576	0.00313283	0.205201	-95.0547	29.8112	-11.7911	0.0700809	0.316038	-96.2913	42.8941	-7.8691	0.0414541	0.227679	-56.9639	21.1439	-2.75128	0.0683498	0.15117	-73.3488	25.7518	-3.28018	0.0870721	0.161515	-61.7928	45.423	-1.57771	0.126576	0.164391	-49.8588	31.7815	-1.87661	0.0756434	0.131199	-18.4293	24.778	0.212924	0.0606527	0.0498768	-29.4054	28.7599	-0.306482	0.0692008	0.0883691	124	49.6	-64.8447	28.387	-4.20342
-120.889	12.6682	-8.7622	0.00313283	0.202068	-92.7037	28.8991	-11.7507	0.065027	0.316712	-91.4245	39.1608	-7.67618	0.0404974	0.225128	-53.5278	23.1399	-2.65391	0.0625	0.147167	-71.0322	24.549	-3.27649	0.0837488	0.150881	-61.1275	43.5422	-1.71156	0.117647	0.160452	-47.296	30.6531	-1.81794	0.0715631	0.129002	-18.8221	24.6719	0.127175	0.0575739	0.049569	-26.7795	28.1984	-0.309012	0.0692008	0.0841455	125	50	-62.7031	27.728	-4.17201
-117.868	12.3143	-8.61158	0.00250627	0.194236	-90.3528	27.9869	-11.711	0.0613208	0.313679	-86.6756	35.5172	-7.49132	0.0382653	0.226403	-50.0917	25.1359	-2.55217	0.0618842	0.144397	-69.6672	24.8841	-3.26291	0.0840811	0.148222	-60.4621	41.9056	-1.83514	0.112658	0.161239	-44.7332	29.6011	-1.78181	0.0662272	0.130885	-19.9246	24.5658	0.0381552	0.0563424	0.0511084	-24.5521	27.6411	-0.340341	0.0692008	0.0795971	126	50.4	-60.8472	27.1876	-4.1364
-114.848	11.9604	-8.46473	0.0018797	0.193609	-88.3086	27.2571	-11.6946	0.0562668	0.313342	-82.3407	32.4254	-7.30188	0.0376276	0.225128	-46.9953	27.1319	-2.42697	0.0628079	0.141933	-68.3023	25.255	-3.24563	0.0850781	0.145896	-59.7968	40.5656	-1.95554	0.108718	0.168855	-42.7385	28.5491	-1.73316	0.0652856	0.131827	-21.1922	24.4596	-0.0546722	0.0538793	0.0554187	-23.1022	27.0838	-0.35036	0.0675763	0.0786225	127	50.8	-59.4035	26.9062	-4.10239
-112.271	11.6066	-8.3155	0.0018797	0.194549	-86.5774	26.6065	-11.6575	0.050876	0.311995	-78.1899	30.9031	-7.11816	0.0366709	0.226722	-44.7637	29.1545	-2.31224	0.0631158	0.143165	-66.9373	26.0438	-3.24641	0.0854104	0.145563	-59.1314	39.4639	-2.07245	0.10583	0.177258	-40.8471	27.4971	-1.68426	0.0630885	0.132454	-22.6331	24.3535	-0.154675	0.0514163	0.0578818	-23.281	26.5265	-0.360302	0.0717999	0.0818713	128	51.2	-59.3484	27.4773	-4.06695
-110.816	11.2527	-8.16698	0.00156642	0.193922	-84.8462	27.7584	-11.6203	0.0468329	0.311995	-82.0408	31.154	-6.92311	0.0344388	0.226722	-43.0008	31.2073	-2.20406	0.0621921	0.151478	-65.5724	26.9156	-3.24297	0.0837488	0.150548	-58.4661	38.3621	-2.19962	0.114758	0.187237	-39.5538	30.429	-1.63069	0.0655995	0.134338	-24.1537	24.2474	-0.243248	0.0529557	0.0612685	-25.6867	25.9692	-0.371563	0.0769981	0.0870695	129	51.6	-59.7057	28.1448	-4.03303
-111.402	10.8988	-8.01783	0.00125313	0.192356	-83.115	29.0593	-11.582	0.0454852	0.309636	-85.8918	32.0511	-6.74292	0.036352	0.226403	-41.6562	33.2601	-2.0908	0.0643473	0.162254	-64.2202	27.7873	-3.24129	0.0814224	0.154869	-57.8007	37.2603	-2.32223	0.123687	0.196691	-39.4984	33.3756	-1.57652	0.0677966	0.135593	-25.6743	24.1663	-0.346557	0.0523399	0.0686576	-28.0925	25.4447	-0.377128	0.0808967	0.0916179	130	52	-60.4856	29.1062	-3.99922
-112.831	10.8688	-7.86734	0.00125313	0.18985	-82.2458	30.3599	-11.5643	0.0421159	0.309973	-89.7419	33.3279	-6.55913	0.0395408	0.22162	-40.967	35.3124	-2.00173	0.0689655	0.171798	-62.9401	28.6587	-3.23377	0.0757727	0.158857	-57.1354	37.0494	-2.42459	0.133666	0.207983	-40.8173	36.3211	-1.51469	0.0734463	0.136535	-27.1946	24.2236	-0.438616	0.0532635	0.0726601	-30.4978	25.8342	-0.388842	0.0851202	0.0964912	131	52.4	-59.1926	27.4088	-3.96137
-109.051	10.6041	-7.82952	0.00093985	0.193922	-81.1956	29.8557	-11.5122	0.0407682	0.31031	-87.3996	31.8495	-6.46015	0.0369898	0.219388	-42.4239	33.9185	-1.99135	0.0606527	0.163793	-62.2396	26.1649	-3.15837	0.0697906	0.153872	-56.1853	35.923	-2.46135	0.122374	0.207458	-38.6914	30.9116	-1.49607	0.0674827	0.131827	-25.7366	23.2167	-0.377894	0.049569	0.0683498	-29.8102	24.2349	-0.365408	0.0802469	0.0847953	132	52.8	-58.0487	26.0155	-3.9196
-105.488	10.3393	-7.78318	0.000626566	0.196115	-80.7751	29.3516	-11.4508	0.037062	0.31469	-85.0574	30.371	-6.36737	0.0353954	0.21875	-44.3045	32.5245	-1.97346	0.0569581	0.153017	-61.5391	25.6656	-3.08725	0.0624792	0.150548	-55.2353	34.9089	-2.50655	0.113445	0.205882	-36.6374	25.5021	-1.45304	0.0640301	0.126177	-24.2786	22.2098	-0.324188	0.0474138	0.0609606	-29.1225	23.2666	-0.33052	0.079922	0.0737492	133	53.2	-57.1811	24.715	-3.88604
-102.019	10.0745	-7.74131	0.000313283	0.199248	-80.4713	28.8475	-11.4022	0.0367251	0.317049	-82.7152	28.8926	-6.29472	0.036352	0.220982	-46.43	31.1306	-1.96121	0.0557266	0.139778	-60.8385	25.5566	-3.01058	0.0604852	0.146893	-54.2853	33.8949	-2.5409	0.103729	0.201155	-36.615	20.0926	-1.42923	0.064344	0.12398	-22.8207	21.2029	-0.283513	0.0464901	0.0563424	-28.4348	22.7429	-0.310696	0.0737492	0.0646524	134	53.6	-56.6685	23.9787	-3.84752
-98.5502	9.8097	-7.70486	0	0.204261	-80.1675	28.3433	-11.3422	0.0363881	0.322776	-80.373	27.4141	-6.2161	0.036352	0.222258	-48.9133	29.7367	-1.95356	0.0532635	0.133929	-60.138	26.0079	-2.94129	0.0568295	0.143237	-53.3353	32.8808	-2.56952	0.0995273	0.197742	-39.3441	19.0401	-1.38191	0.0621469	0.116761	-21.448	20.196	-0.224911	0.0464901	0.0529557	-27.7471	22.3795	-0.293277	0.0698506	0.0646524	135	54	-56.2369	23.4976	-3.80806
-95.1168	9.54491	-7.66928	0	0.207707	-79.9848	27.8851	-11.2844	0.0353774	0.325809	-78.0307	25.9357	-6.11968	0.0373087	0.22162	-51.6816	28.3427	-1.94409	0.0551108	0.127771	-59.4375	26.4593	-2.86887	0.0545032	0.140911	-52.5038	31.8668	-2.59734	0.095063	0.195903	-42.0732	20.2387	-1.34313	0.059322	0.116133	-20.2444	19.1891	-0.169248	0.0455665	0.0514163	-27.0595	22.0161	-0.276482	0.0679012	0.0614035	136	54.4	-55.9597	23.5234	-3.76645
-92.1138	9.28013	-7.62818	0	0.210213	-80.2098	27.5069	-11.2327	0.037062	0.331536	-75.6885	24.4572	-6.02732	0.0398597	0.220663	-54.4499	26.9488	-1.93148	0.0584975	0.127771	-58.7898	27.3505	-2.80178	0.0518445	0.13659	-51.7942	33.1863	-2.62806	0.0919118	0.196429	-44.8023	23.0661	-1.30487	0.0624608	0.117389	-19.0712	18.2623	-0.11209	0.0446429	0.0480296	-26.7181	21.6527	-0.231584	0.0688759	0.0607537	137	54.8	-55.8224	23.9061	-3.72812
-89.1108	9.01535	-7.59509	0	0.214286	-80.4349	27.1287	-11.1809	0.0384097	0.33659	-73.3463	24.748	-5.95942	0.0424107	0.221939	-57.2182	25.5549	-1.91735	0.0615764	0.126232	-58.4485	28.5683	-2.7337	0.0555002	0.136258	-51.0846	35.3614	-2.66061	0.0974265	0.204307	-47.5314	26.1458	-1.25949	0.0709353	0.120527	-18.8058	17.3433	-0.0532257	0.0477217	0.0471059	-26.4214	21.2893	-0.19332	0.071475	0.0640026	138	55.2	-55.9459	24.4151	-3.69192
-86.5574	8.75056	-7.55725	0	0.217732	-80.6599	26.7505	-11.1276	0.0478437	0.341644	-71.1625	26.1757	-5.87847	0.0465561	0.220663	-59.9865	24.1609	-1.90315	0.0655788	0.127463	-58.2858	29.7862	-2.66977	0.0601529	0.13792	-51.4986	37.5365	-2.6953	0.102416	0.211397	-50.2605	29.2256	-1.22245	0.0759573	0.125863	-18.8675	16.4242	-0.0021436	0.0501847	0.049569	-26.2339	20.9259	-0.17121	0.0756985	0.0682261	139	55.6	-56.4423	25.0016	-3.6509
-84.1862	8.48578	-7.51695	0	0.216792	-80.885	26.3723	-11.0681	0.0518868	0.341307	-69.06	27.6363	-5.78522	0.0507015	0.216837	-62.7548	22.767	-1.88798	0.070197	0.127463	-58.1232	31.004	-2.57944	0.0674643	0.139249	-53.9885	39.7116	-2.73315	0.103466	0.222426	-52.9896	32.3053	-1.20757	0.0853735	0.131199	-19.0417	15.5052	0.0538341	0.0511084	0.0504926	-26.9515	21.2266	-0.133537	0.0786225	0.0727745	140	56	-57.2798	26.1848	-3.6132
-83.9261	8.22101	-7.47843	0	0.217419	-81.1562	25.9939	-11.0039	0.0559299	0.341644	-66.9576	29.0966	-5.70067	0.0532526	0.21301	-65.5221	23.614	-1.87649	0.083436	0.132697	-57.96	32.2977	-2.51491	0.0724493	0.140246	-57.0545	41.8862	-2.76773	0.107668	0.22479	-55.7178	35.3842	-1.17622	0.0951036	0.138104	-19.2158	16.1556	0.110188	0.0532635	0.0523399	-28.0081	23.0143	-0.110706	0.0821962	0.0779727	141	56.4	-55.3475	25.2971	-3.53524
-84.6502	8.00308	-7.3987	0	0.218985	-77.9139	24.7945	-10.8686	0.0532345	0.339286	-65.1676	28.6112	-5.61877	0.046875	0.212372	-62.5195	21.7445	-1.75442	0.0818966	0.126232	-54.9946	30.5838	-2.50612	0.0687936	0.139914	-53.4973	41.154	-2.56165	0.102416	0.209821	-53.5685	33.8817	-1.16767	0.0885122	0.135279	-19.2739	15.7331	0.137891	0.0508005	0.0449507	-26.5419	23.1683	-0.0791261	0.0711501	0.0675763	142	56.8	-53.758	24.6874	-3.45506
-85.3744	7.78515	-7.32062	0	0.219298	-74.8294	23.6983	-10.7353	0.0498652	0.335243	-65.46	28.1259	-5.53624	0.036352	0.208865	-59.9352	20.1565	-1.63565	0.0791256	0.122845	-52.1075	28.9462	-2.49669	0.0694583	0.138584	-50.2592	40.4218	-2.32414	0.0990021	0.19354	-51.4192	32.3793	-1.1579	0.0803515	0.134965	-19.332	16.8797	0.14912	0.0483374	0.041564	-25.1047	23.7936	-0.0381059	0.0627031	0.0581546	143	57.2	-52.4706	24.1324	-3.37504
-86.0985	7.56722	-7.24059	0	0.220238	-71.7449	22.6022	-10.5942	0.0485175	0.329852	-66.5112	27.6406	-5.44304	0.0318878	0.205357	-58.3344	19.013	-1.50135	0.075431	0.11915	-49.4022	27.3086	-2.49644	0.0667996	0.137587	-47.4945	39.6895	-2.11067	0.0955882	0.184086	-49.5918	30.8768	-1.1383	0.0762712	0.133082	-19.39	18.0263	0.166215	0.0464901	0.0350985	-23.6676	24.4673	-0.0169483	0.0523067	0.0471085	144	57.6	-51.4815	24.2179	-3.29285
-86.8226	7.3493	-7.16367	0	0.220551	-68.6995	24.2955	-10.4588	0.0448113	0.326819	-68.508	27.1553	-5.3595	0.0302934	0.200893	-57.1734	20.6798	-1.38215	0.075431	0.111761	-46.697	25.671	-2.47673	0.0621469	0.137255	-45.7897	39.0949	-1.88023	0.0942752	0.172794	-47.9647	29.4012	-1.12514	0.0743879	0.132141	-19.4481	19.173	0.20031	0.046798	0.0320197	-22.2305	25.141	0.0102168	0.0445094	0.0412606	145	58	-50.678	24.4069	-3.21135
-87.5468	7.13137	-7.08754	0	0.221491	-65.8319	26.2385	-10.314	0.0427898	0.32345	-70.5049	26.67	-5.27465	0.0315689	0.198023	-56.2351	22.5071	-1.25553	0.0717365	0.110837	-44.1934	24.0334	-2.45423	0.0601529	0.139581	-45.1532	38.6266	-1.67196	0.0934874	0.164653	-46.3376	28.2304	-1.11452	0.0728186	0.133082	-19.5062	20.4098	0.218794	0.0508005	0.03633	-20.7934	25.8147	0.051459	0.0354126	0.0341131	146	58.4	-49.9913	24.9256	-3.12656
-88.2709	6.91344	-7.00871	0	0.221491	-63.1919	28.1814	-10.1659	0.0397574	0.321429	-72.5017	26.1847	-5.18153	0.0328444	0.194515	-55.2969	24.3343	-1.12869	0.0717365	0.109298	-42.2267	24.8661	-2.44682	0.0571618	0.143569	-44.8026	38.4003	-1.44539	0.0903361	0.1573	-44.7104	27.3005	-1.08579	0.0750157	0.136849	-19.5643	21.6608	0.240047	0.0538793	0.039101	-19.3563	26.4884	0.0837776	0.0367122	0.0337882	147	58.8	-49.8259	26.079	-3.04548
-89.0056	6.69551	-6.93119	0	0.222744	-62.8119	30.1244	-10.0338	0.0397574	0.320418	-74.6752	25.6994	-5.08301	0.0334821	0.194515	-54.3587	26.1616	-1.01082	0.0738916	0.109606	-41.6043	26.0739	-2.4233	0.0564972	0.148887	-45.1613	39.0011	-1.21326	0.0892857	0.14916	-43.0833	30.8463	-1.09448	0.0794099	0.13936	-19.8132	22.9118	0.252963	0.0578818	0.0412562	-17.9192	27.1968	0.127618	0.0425601	0.0363873	148	59.2	-50.1464	27.619	-2.96169
-90.2025	6.47759	-6.853	0	0.223058	-62.4361	32.0674	-9.88471	0.0384097	0.317722	-77.0101	26.5338	-4.9911	0.0366709	0.20727	-53.4708	27.9888	-0.874956	0.0778941	0.109606	-41.0597	27.2816	-2.42091	0.0555002	0.151878	-45.5201	40.0086	-0.998087	0.0948004	0.142857	-41.4561	35.856	-1.06709	0.0878845	0.142498	-20.1117	24.1627	0.29075	0.0665025	0.0461823	-20.0507	28.1946	0.143887	0.0497076	0.0402859	149	59.6	-50.7576	29.6401	-2.88352
-91.3994	6.91374	-6.77555	0	0.221491	-62.4781	34.0103	-9.74704	0.0394205	0.317049	-79.3449	30.7022	-4.91374	0.0369898	0.210459	-52.8331	29.8161	-0.748424	0.080665	0.109298	-40.6686	28.4894	-2.41307	0.0561648	0.157527	-45.8788	41.3049	-0.792939	0.10084	0.141019	-39.829	40.8657	-1.04987	0.0960452	0.146893	-21.938	25.4666	0.315896	0.0726601	0.0501847	-22.4483	29.1923	0.173098	0.0558804	0.0445094	150	60	-51.5394	31.8226	-2.80011
-92.5954	7.61955	-6.70303	0	0.221491	-62.6447	36.1027	-9.58885	0.041442	0.316375	-81.679	34.8688	-4.82509	0.0395408	0.20727	-52.195	31.6422	-0.620531	0.0880542	0.11053	-40.2775	29.6964	-2.39251	0.0571618	0.163509	-46.9204	43.1363	-0.575255	0.111345	0.144695	-38.2016	45.8734	-1.04501	0.103578	0.150973	-24.4964	27.146	0.340293	0.0766626	0.0554187	-24.8449	30.3183	0.208947	0.0640026	0.0480832	151	60.4	-49.6114	29.4944	-2.76296
-89.5669	7.17101	-6.62484	0	0.222118	-61.1613	36.2755	-9.46279	0.0387466	0.313679	-80.3961	30.6968	-4.84086	0.0373087	0.207589	-49.4145	28.1878	-0.556265	0.0815887	0.101601	-39.158	27.2797	-2.36302	0.0521768	0.160186	-45.1074	41.2878	-0.547147	0.107405	0.137868	-35.4269	41.2206	-0.895552	0.100439	0.139046	-23.457	26.0373	0.330006	0.0717365	0.0461823	-22.8145	27.2931	0.0937974	0.0562053	0.0497076	152	60.8	-47.8154	27.5974	-2.72303
-86.5383	7.14405	-6.54866	0	0.222744	-59.6779	36.4482	-9.31199	0.0373989	0.310984	-79.5302	26.5247	-4.84401	0.036352	0.200893	-46.8898	25.5763	-0.485696	0.0741995	0.0979064	-38.5543	26.4286	-2.3348	0.0478564	0.155201	-43.2944	39.4627	-0.491723	0.102153	0.128676	-32.6522	36.5677	-0.778083	0.100126	0.131513	-22.4176	25.4105	0.312504	0.0646552	0.0409483	-20.7841	24.8134	-0.024847	0.0529565	0.0487329	153	61.2	-46.3656	26.6267	-2.68455
-83.5098	7.51713	-6.47085	0	0.222744	-58.1945	36.6209	-9.16604	0.0367251	0.309973	-79.0511	26.5924	-4.83509	0.0369898	0.202806	-44.5629	25.3297	-0.424864	0.0655788	0.0932882	-37.9629	26.5217	-2.30595	0.0451977	0.156863	-41.5155	37.6376	-0.468792	0.10084	0.125	-29.8775	32.24	-0.647197	0.102637	0.123038	-21.3782	24.7836	0.307617	0.0581897	0.0341749	-21.2381	22.3972	-0.149823	0.0510071	0.0493827	154	61.6	-45.1974	25.7333	-2.64256
-80.5639	7.8902	-6.39148	0	0.223997	-56.7112	36.7936	-9.0251	0.0357143	0.308962	-78.572	27.2125	-4.84189	0.0366709	0.205038	-42.236	25.0831	-0.365787	0.0652709	0.0905172	-37.3715	26.6147	-2.27993	0.0435361	0.156198	-39.8267	35.8126	-0.429088	0.0987395	0.122637	-28.067	27.9908	-0.490991	0.100753	0.114878	-20.3388	24.2214	0.30184	0.0557266	0.033867	-23.09	19.9809	-0.2606	0.0477583	0.0545809	155	62	-44.2515	25.274	-2.60633
-77.9132	8.26327	-6.31091	0	0.223997	-55.4453	36.9663	-8.87734	0.0360512	0.311658	-78.4796	27.9596	-4.85138	0.0398597	0.209503	-39.909	24.8365	-0.298662	0.0720443	0.0871305	-36.7801	26.7077	-2.25142	0.0422067	0.155533	-38.1379	34.1075	-0.402499	0.0948004	0.122899	-27.1853	26.3538	-0.361614	0.0976146	0.108914	-19.3128	23.9577	0.28494	0.054803	0.0341749	-25.1006	18.3131	-0.388066	0.0435348	0.0578298	156	62.4	-43.4312	25.2024	-2.56742
-75.2625	8.63634	-6.23486	0	0.225877	-54.361	37.1391	-8.73425	0.0360512	0.31031	-78.7924	29.0339	-4.85974	0.0446429	0.210778	-37.925	24.6382	-0.227821	0.0837438	0.0889778	-36.1887	26.8007	-2.21583	0.0428714	0.15653	-36.4491	33.1473	-0.366987	0.0966387	0.124475	-26.4184	26.6747	-0.237002	0.0947897	0.100439	-18.3729	23.6941	0.276395	0.0523399	0.0314039	-27.1112	17.0577	-0.506673	0.0412606	0.0614035	157	62.8	-42.78	25.9752	-2.52548
-72.6117	9.00941	-6.16059	0	0.225877	-53.9929	37.3118	-8.59751	0.0357143	0.306941	-79.1052	30.1082	-4.87094	0.0484694	0.214605	-36.2598	27.149	-0.1663	0.0862069	0.0923645	-35.964	26.8937	-2.17924	0.0422067	0.153872	-34.7603	33.6907	-0.32205	0.103729	0.126313	-25.6515	28.2368	-0.0865889	0.0963591	0.0985562	-17.5528	23.502	0.270811	0.0523399	0.0317118	-29.1218	17.875	-0.616892	0.0389864	0.0672515	158	63.2	-42.423	27.3178	-2.48421
-69.961	9.38248	-6.08295	0	0.226504	-54.5884	37.4845	-8.45573	0.0363881	0.302898	-79.615	31.3927	-4.86513	0.0542092	0.220026	-34.5947	32.049	-0.0887655	0.0982143	0.0969828	-35.8702	26.9868	-2.14755	0.0398804	0.154204	-33.3038	35.2128	-0.282323	0.111082	0.13104	-25.5303	30.4856	0.054702	0.0938481	0.0976146	-16.8806	23.3921	0.258484	0.0541872	0.0347906	-31.4632	19.4741	-0.748624	0.0412606	0.0737492	159	63.6	-42.9626	28.733	-2.453
-67.3103	9.75556	-6.00643	0	0.225877	-55.3824	37.6572	-8.327	0.0397574	0.299191	-80.4903	33.0269	-4.87249	0.0583546	0.22162	-33.2703	36.9491	-0.0283959	0.104372	0.103756	-35.7765	27.0798	-2.12916	0.041542	0.152875	-34.5609	37.0389	-0.256906	0.118172	0.136555	-27.9823	32.7344	0.169343	0.0957313	0.0960452	-17.6976	23.2823	0.241232	0.0544951	0.0344828	-34.1925	21.0732	-0.867198	0.0454841	0.0812216	160	64	-43.7166	30.197	-2.40976
-64.6596	10.1281	-5.92985	0.000313283	0.225564	-56.4113	37.8299	-8.17625	0.0438005	0.299191	-81.3644	34.66	-4.8644	0.0644133	0.222258	-32.9014	41.847	0.0500529	0.11484	0.111145	-35.6826	27.1726	-2.10483	0.0448654	0.150881	-35.8173	38.8647	-0.220397	0.123687	0.142332	-30.4335	35.3775	0.310979	0.0982423	0.0998117	-19.1021	23.2223	0.23136	0.0609606	0.0394089	-37.0775	22.6713	-0.984522	0.0526316	0.0903184	161	64.4	-41.9718	29.0714	-2.37169
-61.8338	8.39149	-5.83823	0	0.224624	-54.8528	37.75	-8.10751	0.041779	0.298518	-77.5999	32.8187	-4.79107	0.0609056	0.223214	-32.9407	38.0416	-0.0269216	0.107143	0.106219	-34.9939	26.5581	-2.08337	0.0418744	0.148554	-33.9642	39.4676	-0.123615	0.116071	0.133666	-29.9304	34.7989	0.373377	0.0957313	0.0969868	-17.6163	23.8058	0.18563	0.0538793	0.0332512	-34.0144	20.0108	-0.933515	0.0480832	0.0802469	162	64.8	-40.3905	28.1629	-2.33007
-59.1112	6.65487	-5.74717	0	0.227757	-53.2943	37.6702	-8.02387	0.0394205	0.298181	-73.8355	31.6061	-4.71794	0.0567602	0.22449	-33.6031	34.2362	-0.122475	0.0994458	0.104064	-34.3051	25.9436	-2.0487	0.0412097	0.142572	-32.1111	40.1371	-0.0468974	0.108193	0.125788	-29.4273	34.2202	0.441532	0.0944758	0.0935342	-16.1303	24.4389	0.170285	0.052032	0.0289409	-31.6967	18.5592	-0.875368	0.042885	0.0708252	163	65.2	-38.8549	27.6539	-2.29159
-56.4678	4.91825	-5.65486	0	0.228697	-51.8829	37.5904	-7.93519	0.0373989	0.297844	-70.071	30.3936	-4.6307	0.0535714	0.222577	-34.2655	30.9034	-0.20646	0.0929803	0.103448	-33.6164	25.3291	-2.00821	0.039548	0.13792	-30.258	40.8066	0.0152997	0.102679	0.117122	-28.9242	33.6416	0.494394	0.0951036	0.0919648	-14.6445	25.072	0.134859	0.0489532	0.0206281	-29.5637	20.2305	-0.833398	0.0389864	0.0604288	164	65.6	-37.4969	27.3547	-2.25142
-53.8245	4.41515	-5.56693	0	0.228697	-52.0701	37.5106	-7.86249	0.0357143	0.295822	-66.3066	29.5408	-4.54026	0.0500638	0.220663	-34.928	27.7194	-0.292429	0.0917488	0.103448	-32.9276	24.7262	-1.98505	0.038551	0.134929	-28.4049	41.4761	0.102431	0.102416	0.110032	-28.4212	33.0629	0.562777	0.0966729	0.0872567	-13.1586	25.7051	0.101869	0.0464901	0.0178571	-27.4308	22.0357	-0.782744	0.0363873	0.0610786	165	66	-36.5116	27.1675	-2.21228
-51.1812	4.28772	-5.47476	0	0.23089	-52.6422	37.4307	-7.802	0.0333558	0.292116	-62.5421	28.9304	-4.47744	0.0465561	0.220026	-35.5904	24.5354	-0.37068	0.0926724	0.106835	-32.3706	24.1787	-1.94681	0.0392157	0.130276	-28.6791	42.1457	0.175008	0.103729	0.104779	-27.9181	32.4843	0.632724	0.0994978	0.0828625	-12.3827	26.4976	0.0860903	0.0452586	0.0172414	-25.2978	24.0173	-0.73266	0.0350877	0.0653021	166	66.4	-36.2326	27.4473	-2.18135
-48.5379	4.1603	-5.38563	0	0.234649	-53.3102	37.3509	-7.72687	0.0350404	0.290768	-58.7777	28.32	-4.39631	0.0424107	0.220026	-36.3281	25.428	-0.465531	0.0932882	0.109914	-33.7979	23.6312	-1.92333	0.038551	0.128614	-31.4153	42.8152	0.23717	0.108718	0.107668	-27.6581	31.9057	0.675603	0.10295	0.0797238	-13.1039	27.3299	0.0468157	0.0489532	0.0178571	-23.1648	26.0847	-0.694103	0.0380117	0.0675763	167	66.8	-36.1131	27.8879	-2.1408
-45.8945	4.03287	-5.29556	0	0.234649	-54.2273	37.2711	-7.65068	0.0367251	0.286388	-55.0132	27.7096	-4.31401	0.0389031	0.214923	-37.2267	27.7682	-0.546801	0.0948276	0.115456	-35.2252	23.0838	-1.89361	0.0412097	0.128946	-34.1515	43.4847	0.323123	0.116859	0.109506	-28.3198	31.327	0.729405	0.109542	0.0806654	-13.8251	28.1622	0.0276817	0.0526478	0.0280172	-21.1348	28.1521	-0.64672	0.0425601	0.0705003	168	67.2	-36.159	28.3711	-2.09676
-43.2512	3.90544	-5.20487	0	0.234962	-55.2879	37.1912	-7.58471	0.0390836	0.285377	-51.2488	27.1794	-4.22976	0.0366709	0.201531	-38.1253	30.1432	-0.635038	0.0948276	0.123153	-36.6525	22.5363	-1.85886	0.0418744	0.127617	-36.8877	44.4221	0.41413	0.127101	0.112658	-29.6352	30.7484	0.813508	0.111739	0.0831764	-14.7326	28.9945	-0.00131802	0.0557266	0.0378695	-19.6097	30.2195	-0.583964	0.0484081	0.0734243	169	67.6	-36.7056	29.0562	-2.062
-41.203	3.77802	-5.11317	0	0.233396	-56.3484	37.1114	-7.50646	0.0404313	0.282008	-47.517	27.7018	-4.13665	0.0369898	0.196747	-39.0239	32.6531	-0.724573	0.0975985	0.130234	-38.0797	21.9889	-1.83203	0.0432037	0.126288	-39.6239	45.5598	0.485944	0.13813	0.120273	-31.1178	30.5989	0.850729	0.120841	0.0863151	-15.9624	29.8268	-0.0370308	0.0591133	0.0480296	-21.4742	32.2869	-0.544725	0.0549058	0.0792723	170	68	-37.5188	30.1427	-2.0232
-39.5444	3.65061	-5.02061	0	0.232456	-57.4081	37.031	-7.42766	0.0411051	0.278302	-44.0417	28.3117	-4.06233	0.0411352	0.198023	-39.9218	35.4404	-0.820073	0.0960591	0.141626	-39.5059	21.8422	-1.80171	0.0485211	0.128946	-42.3586	46.6965	0.557937	0.153887	0.130515	-32.5988	33.2568	0.921497	0.128688	0.0900816	-18.0821	30.6582	-0.0596179	0.0621921	0.0563424	-24.2074	34.3968	-0.496236	0.0614035	0.0825211	171	68.4	-35.6373	28.6762	-2.01531
-38.7426	3.79064	-4.97338	0	0.232143	-55.4298	34.9199	-7.41461	0.0394205	0.27965	-42.7852	26.4237	-4.03219	0.0385842	0.193878	-38.0252	33.8115	-0.724858	0.0914409	0.132389	-37.0646	20.6865	-1.72898	0.0455301	0.127285	-40.1454	44.6525	0.435552	0.142332	0.125	-28.3263	32.5206	0.802431	0.119272	0.0869429	-17.2529	28.275	-0.0462474	0.0612685	0.0504926	-22.9635	33.0054	-0.455536	0.0604288	0.0730994	172	68.8	-34.3916	27.4973	-2.00611
-37.9517	4.37435	-4.92714	0	0.23089	-53.4515	32.8089	-7.40081	0.037062	0.282008	-41.5287	24.5357	-4.01483	0.0353954	0.19324	-36.1287	33.132	-0.633592	0.0895936	0.122229	-34.6233	19.9317	-1.63758	0.0422067	0.125955	-38.4976	42.6086	0.317882	0.136555	0.125263	-28.1012	32.5352	0.69576	0.111739	0.0809793	-17.0813	25.8918	-0.0284197	0.057266	0.0458744	-22.1605	31.6575	-0.426265	0.060104	0.0633528	173	69.2	-33.491	26.4053	-2.00052
-37.1709	5.18956	-4.88084	0	0.227444	-51.5796	30.6978	-7.3833	0.0347035	0.28066	-41.9302	22.7513	-3.97391	0.0334821	0.19037	-34.2685	32.4525	-0.556472	0.0892857	0.109298	-32.182	19.1947	-1.56748	0.040545	0.122632	-37.3153	40.5646	0.189733	0.133141	0.122637	-28.263	32.9789	0.578006	0.100753	0.0784683	-17.3516	23.5086	-0.0151176	0.0554187	0.044335	-21.3574	30.3096	-0.395308	0.0568551	0.0594542	174	69.6	-33.0014	25.6724	-1.98967
-36.3902	6.28891	-4.83328	0	0.225251	-50.4373	28.5868	-7.3707	0.0330189	0.282682	-44.598	21.7499	-3.93593	0.0331633	0.191327	-32.4893	31.7731	-0.468147	0.0880542	0.10468	-29.7407	20.2608	-1.49733	0.0435361	0.120306	-36.133	38.5206	0.077689	0.126313	0.121849	-28.8574	33.4226	0.472647	0.0951036	0.0728186	-17.7654	21.4874	0.0102873	0.0532635	0.044335	-20.6016	28.9616	-0.362238	0.0552307	0.0562053	175	70	-32.8602	25.0219	-1.97675
-35.6095	7.59201	-4.78487	0	0.225251	-50.5138	26.4758	-7.35286	0.0326819	0.28066	-47.2657	20.7486	-3.9146	0.0325255	0.189732	-30.7101	31.0936	-0.359379	0.0895936	0.0972906	-27.4398	21.6387	-1.41413	0.0428714	0.11665	-34.9507	36.4767	-0.0399285	0.121061	0.125525	-29.5279	33.8663	0.376094	0.0863151	0.069366	-18.2096	19.6916	0.0220477	0.0538793	0.0446429	-21.5144	27.6137	-0.32315	0.0529565	0.0610786	176	70.4	-33.099	24.5996	-1.97207
-34.8287	8.89609	-4.73712	0	0.225251	-50.8644	24.3647	-7.33821	0.0320081	0.277628	-49.9335	19.9131	-3.90007	0.0334821	0.186862	-28.931	30.4142	-0.277798	0.0902094	0.0917488	-25.1756	23.0166	-1.33204	0.0445331	0.111	-34.5523	34.4327	-0.158086	0.124212	0.128939	-30.1984	34.31	0.254649	0.0699937	0.071877	-18.6538	19.7832	0.039647	0.0557266	0.0458744	-24.7532	26.2658	-0.299639	0.0516569	0.0636777	177	70.8	-33.4473	24.5211	-1.96007
-34.048	10.2372	-4.6904	0.00093985	0.222118	-51.2151	23.244	-7.31359	0.032345	0.278302	-52.6012	20.0778	-3.87629	0.0373087	0.183673	-27.1518	29.7347	-0.189497	0.0954433	0.0874384	-23.3278	24.3945	-1.25557	0.0455301	0.107677	-34.7226	32.3887	-0.264358	0.125263	0.135767	-30.8689	34.7538	0.157173	0.0665411	0.0778406	-19.098	20.9411	0.0594813	0.0594212	0.0514163	-27.9919	24.9179	-0.267603	0.054256	0.0695257	178	71.2	-34.0563	25.2797	-1.95099
-33.2673	11.8521	-4.64589	0.00250627	0.221178	-51.6729	23.5567	-7.29889	0.0309973	0.275943	-55.2689	21.0986	-3.85535	0.0408163	0.177615	-25.3727	29.0552	-0.106006	0.0948276	0.0892857	-23.6364	25.7724	-1.1828	0.0458624	0.109339	-34.9761	34.7649	-0.371637	0.125	0.14312	-31.5394	35.3879	0.0364063	0.0677966	0.0860013	-19.5422	22.4595	0.0823449	0.0637315	0.0554187	-31.2306	23.57	-0.21706	0.0584795	0.0717999	179	71.6	-34.8906	26.419	-1.94483
-33.2959	13.467	-4.60048	0.00438596	0.218985	-52.4198	23.8694	-7.27794	0.0316712	0.272237	-57.9367	22.1194	-3.82236	0.0459184	0.170599	-23.7525	30.9694	-0.0320287	0.0969828	0.0920567	-23.971	27.1503	-1.09914	0.0485211	0.110336	-35.6312	37.5769	-0.494669	0.126576	0.154149	-32.2099	36.3081	-0.0780942	0.069366	0.091651	-20.3289	24.0884	0.0951233	0.067734	0.0600369	-34.4693	22.222	-0.193883	0.0633528	0.0779727	180	72	-36.1889	27.7332	-1.93132
-34.3267	15.0809	-4.55118	0.00532581	0.217732	-53.1947	24.1817	-7.26278	0.0303235	0.278639	-60.6036	23.3754	-3.80312	0.0516582	0.170281	-22.9019	33.8536	0.0712523	0.0994458	0.0942118	-24.6751	28.5276	-1.01711	0.0588235	0.109006	-37.1163	40.3862	-0.601992	0.128676	0.158876	-32.9299	37.6023	-0.182153	0.0743879	0.100439	-22.2456	25.7168	0.117047	0.0717365	0.0646552	-37.7063	20.8742	-0.151831	0.0727745	0.0818713	181	72.4	-35.1297	26.1061	-1.95922
-33.3597	13.8991	-4.5876	0.00438596	0.218045	-50.67	23.4641	-7.20781	0.027628	0.282682	-60.5716	23.0334	-3.85838	0.0475128	0.174426	-22.7196	31.8671	0.0946603	0.0874384	0.0775862	-24.7	27.8581	-1.02858	0.0545032	0.108009	-35.4244	34.9267	-0.656875	0.113445	0.148897	-31.9347	33.938	-0.213947	0.071877	0.0994978	-21.0738	25.5264	0.0948396	0.0640394	0.0591133	-35.7131	20.442	-0.269326	0.0630279	0.0818713	182	72.8	-34.5437	24.7523	-1.99086
-33.8426	12.7174	-4.62022	0.00281955	0.216792	-49.7985	22.7464	-7.15454	0.027965	0.28841	-60.5396	22.6914	-3.92468	0.0414541	0.17889	-23.624	29.8807	0.111475	0.0822044	0.0652709	-24.7248	27.1887	-1.02627	0.0541708	0.10668	-33.7519	31.5958	-0.713212	0.101103	0.140231	-30.9895	30.2738	-0.26869	0.0731325	0.0954175	-19.902	25.3698	0.074137	0.0569581	0.0557266	-33.7199	20.3065	-0.395758	0.0536062	0.0812216	183	73.2	-34.2678	23.8231	-2.01871
-35.203	11.5356	-4.65206	0.0018797	0.215852	-48.9271	22.0287	-7.10533	0.027965	0.288747	-60.5076	22.3493	-3.987	0.0379464	0.180166	-24.7752	27.8942	0.132366	0.0735837	0.0511084	-24.7497	26.5193	-1.02916	0.0521768	0.102027	-33.4079	31.1902	-0.754312	0.0905987	0.135242	-30.0443	27.0299	-0.317951	0.0712492	0.0925926	-18.8191	25.2345	0.0548337	0.0483374	0.0489532	-31.9764	20.6263	-0.509751	0.0490578	0.0818713	184	73.6	-34.2012	23.2034	-2.04406
-36.6483	10.3538	-4.68306	0.000626566	0.214912	-48.0556	21.7226	-7.04294	0.0272911	0.293127	-60.4757	22.0073	-4.05478	0.0360332	0.181441	-26.0477	25.9077	0.148743	0.0621921	0.0452586	-24.7745	25.8499	-1.03554	0.0518445	0.10103	-34.4541	30.7847	-0.791604	0.082458	0.132616	-29.0991	26.1036	-0.349998	0.0740741	0.0907094	-17.9842	25.0993	0.0411702	0.044335	0.0427956	-30.2711	21.0013	-0.628491	0.0510071	0.0825211	185	74	-34.2673	22.74	-2.07442
-38.0935	9.17208	-4.71758	0	0.214912	-47.1842	21.8863	-6.98128	0.0343666	0.297844	-60.4437	22.3877	-4.11235	0.0357143	0.182398	-27.3202	23.9213	0.161164	0.0554187	0.0431034	-24.8766	25.3956	-1.03731	0.0531738	0.104686	-35.9186	30.3792	-0.845477	0.0772059	0.129989	-28.1539	25.1774	-0.40154	0.0712492	0.0907094	-17.1494	24.964	0.0140246	0.041564	0.0378695	-29.2659	21.3762	-0.749427	0.051332	0.0890188	186	74.4	-34.8966	23.1673	-2.10156
-39.5388	10.0221	-4.74854	0.000313283	0.213659	-46.3127	22.05	-6.91267	0.0407682	0.300876	-60.4117	23.8044	-4.16451	0.0376276	0.179209	-28.5928	24.0959	0.184083	0.0544951	0.0455665	-25.1044	25.1321	-1.03937	0.0535061	0.105683	-37.6038	29.9737	-0.899326	0.0716912	0.129464	-27.6015	25.539	-0.459873	0.0740741	0.0885122	-16.9095	24.8287	-0.0042397	0.0381773	0.0409483	-31.9946	23.0601	-0.869555	0.0532814	0.0968161	187	74.8	-36.0661	24.4039	-2.12697
-41.1038	11.5303	-4.78578	0.00125313	0.211466	-45.4412	22.2137	-6.86018	0.0458221	0.302898	-60.3797	26.2967	-4.24168	0.0360332	0.177934	-29.8653	26.9105	0.213205	0.0560345	0.0504926	-26.2852	25.0104	-1.04786	0.0591559	0.103357	-39.289	29.5681	-0.934206	0.0716912	0.130515	-29.0587	27.4904	-0.499981	0.0747018	0.0894539	-18.4484	24.6935	-0.0170956	0.0381773	0.044335	-34.7232	25.9213	-0.969185	0.0536062	0.101365	188	75.2	-37.3238	25.8695	-2.15798
-42.7444	13.0844	-4.81156	0.0037594	0.213033	-44.7211	23.6868	-6.80295	0.0512129	0.306267	-60.3477	29.1149	-4.29586	0.0369898	0.179209	-31.1378	29.7251	0.226563	0.0581897	0.0557266	-27.9054	24.8886	-1.05374	0.0624792	0.107677	-40.9743	29.1626	-1.00376	0.0769433	0.132878	-30.5159	29.4419	-0.554002	0.0750157	0.0960452	-20.1158	24.5582	-0.0422471	0.0366379	0.0492611	-37.4519	29.1632	-1.08426	0.0558804	0.107537	189	75.6	-38.813	27.6353	-2.18588
-44.3851	14.6386	-4.84528	0.00438596	0.211466	-45.0952	27.1401	-6.74143	0.0579515	0.31031	-60.3158	32.4475	-4.36207	0.0382653	0.183036	-32.4104	32.5396	0.250339	0.0646552	0.0612685	-30.1189	24.9728	-1.05111	0.07112	0.111665	-43.0196	28.7571	-1.04204	0.0890231	0.139443	-31.9731	31.3933	-0.612322	0.0778406	0.102637	-21.8185	24.423	-0.0673112	0.0372537	0.0523399	-40.1806	32.4052	-1.20173	0.0565302	0.113385	190	76	-40.6416	29.5494	-2.21446
-46.0243	16.1914	-4.87524	0.00595238	0.210526	-46.8152	30.592	-6.68251	0.0636792	0.313005	-60.4908	35.777	-4.41499	0.0401786	0.1875	-33.6813	35.3521	0.267915	0.0732759	0.0689655	-32.6099	25.4686	-1.05894	0.0787637	0.117315	-45.1359	28.9069	-1.10478	0.0976891	0.143645	-34.0918	33.7231	-0.65251	0.0787822	0.109856	-24.0176	24.2876	-0.0899302	0.039101	0.0563424	-42.9077	35.6453	-1.31917	0.0588044	0.118259	191	76.4	-38.73	27.4844	-2.22064
-43.8005	14.041	-4.85978	0.00438596	0.210526	-43.3641	30.0846	-6.5558	0.059973	0.311321	-61.078	30.4149	-4.53984	0.0315689	0.189413	-30.6687	32.3414	0.18583	0.0646552	0.0658867	-32.917	24.1639	-1.05113	0.076105	0.114988	-40.348	26.8352	-1.00813	0.0882353	0.133141	-30.9365	31.7092	-0.678552	0.0743879	0.105148	-24.1203	24.0786	-0.178193	0.0341749	0.0538793	-41.3372	33.6911	-1.30012	0.0532814	0.112736	192	76.8	-37.1803	25.5246	-2.22754
-41.6186	11.8904	-4.83959	0.0018797	0.208647	-42.2569	29.7023	-6.44718	0.0572776	0.302561	-61.6651	25.2014	-4.67519	0.0213648	0.190689	-27.8224	29.3308	0.11305	0.0606527	0.0637315	-33.2241	23.0697	-1.04152	0.074111	0.115985	-35.6015	24.7634	-0.922406	0.0819328	0.12395	-28.4441	29.6952	-0.698222	0.0696798	0.106403	-24.2231	23.8696	-0.245969	0.0292488	0.0526478	-39.7668	32.1982	-1.29081	0.0523067	0.107862	193	77.2	-35.7725	23.7292	-2.23837
-39.743	9.73997	-4.82385	0	0.207393	-41.727	29.6905	-6.31497	0.0559299	0.297844	-62.4846	20.4776	-4.80411	0.0127551	0.191645	-24.9951	26.3201	0.0138261	0.0612685	0.0625	-33.5312	22.0988	-1.02933	0.069126	0.11665	-30.9974	22.6917	-0.842796	0.0790441	0.119485	-25.9517	28.1286	-0.701	0.0662272	0.105775	-24.3258	23.6606	-0.34668	0.0252463	0.052032	-38.1964	30.7548	-1.2964	0.0500325	0.105263	194	77.6	-34.9141	22.0808	-2.24585
-38.1167	7.58947	-4.81296	0	0.206454	-41.2874	29.6787	-6.18926	0.0552561	0.292116	-63.5521	15.7537	-4.93299	0.00765306	0.191008	-23.0989	24.3342	-0.0743085	0.0634236	0.0612685	-33.8384	21.3314	-1.02345	0.0681289	0.121303	-29.6043	20.62	-0.752487	0.0877101	0.114233	-23.4593	26.6568	-0.729983	0.066855	0.1086	-24.4286	23.4516	-0.414804	0.020936	0.0529557	-36.8415	29.3115	-1.28241	0.0480832	0.10039	195	78	-34.887	21.6292	-2.25671
-36.5626	5.43898	-4.78908	0	0.206767	-41.1086	29.6669	-6.07539	0.0552561	0.290094	-64.6754	14.818	-5.06841	0.00669643	0.193878	-23.9388	25.6511	-0.164667	0.0621921	0.0631158	-34.1455	21.3802	-1.009	0.0677966	0.122964	-30.8736	21.1228	-0.669841	0.0963761	0.115546	-22.4778	25.1851	-0.750481	0.0677966	0.1086	-24.5313	23.2426	-0.511957	0.0197044	0.0557266	-35.6697	28.157	-1.27157	0.0464587	0.0951917	196	78.4	-35.2686	22.3854	-2.26108
-35.4346	3.95479	-4.76625	0	0.205827	-40.9298	29.6552	-5.94954	0.0569407	0.28841	-65.7987	19.354	-5.18594	0.00860969	0.195791	-24.7788	26.968	-0.23548	0.0625	0.0668103	-34.4526	23.2016	-0.997909	0.0661349	0.120306	-32.1429	22.5886	-0.578934	0.0979517	0.115284	-23.753	24.1846	-0.778355	0.0646579	0.110483	-25.6288	23.3982	-0.597599	0.0212438	0.0618842	-34.498	28.1636	-1.25966	0.042885	0.0964912	197	78.8	-35.9672	23.6057	-2.26704
-34.7927	4.33023	-4.75132	0	0.204887	-40.8217	29.6434	-5.82307	0.0589623	0.287399	-66.9221	23.89	-5.30763	0.0137117	0.199298	-25.6187	28.2849	-0.326927	0.0665025	0.0745074	-34.7597	25.4343	-0.991151	0.0641409	0.11665	-33.4123	24.0545	-0.503771	0.110032	0.11896	-26.5774	24.7202	-0.793186	0.0624608	0.111739	-27.2163	23.7124	-0.669335	0.0221675	0.0695813	-33.584	28.3813	-1.23695	0.0451592	0.0964912	198	79.2	-36.9993	25.4801	-2.27353
-34.5297	4.70567	-4.73438	0	0.204261	-42.3463	29.9241	-5.70785	0.0633423	0.28841	-68.0454	28.426	-5.43482	0.0191327	0.211097	-26.6645	29.8594	-0.409331	0.0649631	0.0800493	-35.2034	27.667	-0.974148	0.0664673	0.115653	-34.6816	26.741	-0.418148	0.121849	0.127363	-29.4017	28.3059	-0.809423	0.0677966	0.112053	-29.2019	24.0266	-0.74637	0.0255542	0.0766626	-32.919	29.6649	-1.2273	0.0490578	0.101365	199	79.6	-38.4023	27.8075	-2.28115
-34.4163	5.08111	-4.71936	0	0.202068	-43.871	30.4516	-5.58262	0.0653639	0.285377	-69.1687	32.962	-5.55973	0.0251913	0.217793	-30.6553	32.6484	-0.498348	0.0714286	0.0923645	-35.7903	29.8997	-0.955925	0.0727817	0.116318	-35.9509	31.2286	-0.33717	0.129202	0.136555	-32.2261	32.3401	-0.832365	0.0721908	0.114564	-31.1874	24.3409	-0.830915	0.0304803	0.0871305	-32.3546	31.3152	-1.21391	0.0519818	0.107212	200	80	-39.9299	30.1538	-2.28685
-34.5413	5.45605	-4.70352	0	0.202068	-45.3938	30.9783	-5.45665	0.0714286	0.28066	-70.2911	37.4954	-5.67555	0.0309311	0.226084	-35.0941	35.619	-0.566257	0.0794335	0.110837	-36.376	32.1311	-0.944168	0.076105	0.119309	-37.2186	35.7137	-0.263469	0.137342	0.146271	-35.0489	36.3721	-0.844447	0.0759573	0.116761	-33.1791	24.6548	-0.926914	0.0387931	0.0960591	-32.226	32.9641	-1.20069	0.0578298	0.116634	201	80.4	-37.9171	28.7908	-2.24899
-33.1435	4.57961	-4.58259	0	0.198308	-42.3747	29.9017	-5.42881	0.069407	0.283019	-69.1853	35.6611	-5.56099	0.0315689	0.222258	-33.2345	33.1391	-0.642886	0.0741995	0.102217	-33.8039	31.3691	-0.89104	0.0664673	0.111997	-34.4975	33.9235	-0.285805	0.130252	0.142857	-34.1123	35.2204	-0.87316	0.0709353	0.109856	-32.1757	24.113	-0.904418	0.0329433	0.0948276	-28.7263	31.2093	-1.0712	0.0536062	0.102989	202	80.8	-35.9299	27.5802	-2.20819
-31.8226	4.12071	-4.4633	0	0.197368	-39.465	28.8251	-5.40112	0.0677224	0.284704	-68.0795	33.8267	-5.42756	0.0302934	0.217156	-31.3747	31.3105	-0.710193	0.0689655	0.100369	-31.2695	30.6838	-0.831131	0.0551678	0.107012	-31.7763	32.1333	-0.347059	0.124212	0.137605	-33.1758	34.2959	-0.867901	0.0634024	0.108286	-31.1796	23.5711	-0.892373	0.0292488	0.0945197	-25.2265	29.4546	-0.933031	0.0529565	0.0922677	203	81.2	-34.2257	26.5624	-2.17257
-30.5827	4.48967	-4.34389	0	0.195802	-37.5872	27.7485	-5.36485	0.0636792	0.280997	-66.9736	31.9924	-5.2975	0.0306122	0.209821	-29.515	29.5438	-0.784901	0.0652709	0.100985	-28.9888	30.3315	-0.785828	0.0521768	0.102027	-30.234	30.343	-0.417104	0.118435	0.135504	-32.2392	33.5003	-0.877302	0.0602637	0.105148	-30.1835	23.1214	-0.880347	0.0267857	0.0929803	-21.7268	27.9907	-0.801372	0.0493827	0.0815465	204	81.6	-33.3978	25.6774	-2.1371
-29.3428	4.85864	-4.2271	0	0.194236	-36.7115	26.6719	-5.32415	0.0609838	0.279987	-65.8678	30.1581	-5.17408	0.0290179	0.206952	-27.8297	27.7771	-0.854021	0.0600369	0.0997537	-28.095	29.9792	-0.749279	0.0525091	0.0960452	-30.504	28.5528	-0.469965	0.116597	0.135504	-31.3027	33.2729	-0.885636	0.0599498	0.103264	-29.1874	22.734	-0.871917	0.0243227	0.0902094	-21.7396	27.0923	-0.677753	0.045809	0.0708252	205	82	-32.9546	24.8727	-2.09466
-28.1029	5.2276	-4.10927	0	0.192043	-36.0658	25.9299	-5.29036	0.0572776	0.278639	-64.762	28.3238	-5.04304	0.0302934	0.201849	-26.9977	26.1616	-0.90722	0.0578818	0.101293	-28.3203	29.6269	-0.696054	0.0518445	0.0927218	-30.7739	26.7626	-0.517382	0.11187	0.136555	-31.2397	33.2338	-0.895927	0.061833	0.107031	-28.1913	22.3466	-0.850018	0.0267857	0.0868227	-22.138	26.2419	-0.542692	0.0435348	0.0682261	206	82.4	-32.8245	24.6166	-2.05427
-27.0641	5.59656	-3.99038	0	0.188283	-36.2363	26.7938	-5.26134	0.0552561	0.270553	-64.0701	26.4895	-4.8994	0.0290179	0.198342	-26.181	24.6472	-0.966061	0.0566502	0.102217	-28.7828	29.2745	-0.646868	0.0531738	0.0867398	-31.0439	27.6811	-0.571613	0.108981	0.133403	-32.3104	33.4564	-0.906874	0.0659134	0.112053	-27.1952	22.1158	-0.844761	0.028633	0.0791256	-22.5365	25.4949	-0.401114	0.0480832	0.0623782	207	82.8	-33.4482	24.5877	-2.01837
-26.0942	5.96552	-3.87338	0	0.186404	-38.0578	27.6577	-5.22123	0.055593	0.267857	-63.625	24.6552	-4.77705	0.0334821	0.194834	-26.377	23.1327	-1.02948	0.0566502	0.104064	-29.2917	28.9222	-0.606154	0.0568295	0.0837488	-33.1948	29.3509	-0.627162	0.110294	0.133403	-33.3811	33.6791	-0.927873	0.0712492	0.114564	-28.0776	22.1919	-0.829192	0.0323276	0.0748153	-22.9349	25.7343	-0.273826	0.0558804	0.0653021	208	83.2	-34.5774	24.9241	-1.97701
-25.4044	6.33449	-3.74828	0	0.182644	-40.1519	28.5216	-5.19868	0.0559299	0.264151	-63.1799	22.8209	-4.65355	0.0392219	0.19324	-28.1944	21.6183	-1.0735	0.0588054	0.109606	-29.9015	28.5699	-0.564015	0.0601529	0.0814224	-36.2141	31.4586	-0.678845	0.112395	0.142857	-34.4518	33.9017	-0.92352	0.0725047	0.118958	-30.0846	22.7484	-0.822286	0.0357143	0.0738916	-23.6137	28.3429	-0.130383	0.065627	0.0711501	209	83.6	-36.0374	25.4922	-1.93798
-25.6437	6.70345	-3.62836	0	0.179511	-42.4602	29.3855	-5.15661	0.0552561	0.261456	-63.0516	21.7661	-4.52717	0.044324	0.192921	-30.0117	20.1038	-1.12895	0.0655788	0.115764	-30.7564	28.2176	-0.511196	0.0671319	0.0800931	-39.2335	33.9755	-0.731165	0.115809	0.152048	-35.5225	34.1243	-0.94166	0.0768989	0.125549	-32.2058	24.0202	-0.813763	0.0387931	0.0748153	-25.4515	31.133	-0.00294829	0.0717999	0.0773229	210	84	-34.67	23.2523	-1.90989
-27.4442	7.0716	-3.51091	0	0.171992	-44.7666	30.2485	-5.12457	0.0552561	0.257075	-63.0074	25.4402	-4.40043	0.0465561	0.191645	-31.8282	20.615	-1.18366	0.0717365	0.123461	-31.7601	27.8651	-0.461511	0.070123	0.0787637	-42.2508	37.9654	-0.775249	0.121061	0.155987	-36.5924	34.3464	-0.934779	0.0828625	0.130571	-34.3799	25.7188	-0.797954	0.0412562	0.0769704	0	0	0	0	0	211	84.4	-33.6561	22.0098	-1.86435
-27.1256	5.72661	-3.4804	0	0.170426	-42.7925	29.1219	-5.05183	0.0471698	0.255054	-61.5648	23.2651	-4.40928	0.041773	0.188776	-31.6954	20.2595	-1.1423	0.0575739	0.11484	-30.287	27.1368	-0.418419	0.0641409	0.075108	-40.7587	34.8712	-0.689846	0.113183	0.14417	-35.9	33.412	-0.868202	0.0740741	0.127746	-32.7809	24.2949	-0.718908	0.0369458	0.0723522	0	0	0	0	0	212	84.8	-32.7938	20.8769	-1.82074
-26.8069	4.50356	-3.45266	0	0.168546	-40.8184	27.9953	-4.98312	0.0441375	0.25438	-60.8399	21.09	-4.41829	0.0334821	0.1875	-31.5626	20.3621	-1.09334	0.046798	0.106219	-29.4609	26.4085	-0.377009	0.0578265	0.0747757	-39.2665	31.8528	-0.598477	0.10688	0.127101	-35.2076	32.5099	-0.824081	0.0690521	0.120841	-31.1819	23.1703	-0.639704	0.0354064	0.0655788	0	0	0	0	0	213	85.2	-31.9921	20.1207	-1.77322
-26.4883	3.47084	-3.424	0	0.166353	-38.8442	26.8687	-4.90806	0.0434636	0.254717	-60.115	21.1737	-4.41315	0.0293367	0.1875	-31.4297	20.4648	-1.0314	0.0366379	0.0960591	-28.7667	25.6802	-0.330938	0.0518445	0.072117	-37.7744	29.5355	-0.528686	0.0963761	0.118697	-34.7855	31.7816	-0.764272	0.0640301	0.115819	-29.7253	22.1107	-0.558446	0.0317118	0.0588054	0	0	0	0	0	214	85.6	-31.2803	19.7683	-1.72812
-26.1696	4.15777	-3.39566	0	0.16604	-37.0914	25.7422	-4.82985	0.0424528	0.253706	-59.3901	22.3839	-4.41657	0.0255102	0.187181	-31.2969	20.7611	-0.994418	0.0298645	0.085899	-28.0829	24.952	-0.276684	0.0478564	0.072117	-36.2822	27.4666	-0.452958	0.0900735	0.116334	-34.6294	31.0534	-0.693428	0.061833	0.113622	-28.5799	21.3979	-0.493543	0.0310961	0.0517241	0	0	0	0	0	215	86	-30.6318	19.5992	-1.68208
-26.0906	4.87982	-3.37308	0	0.164787	-35.4217	24.6156	-4.75961	0.0387466	0.254717	-58.6652	23.5941	-4.41604	0.0232781	0.185268	-31.164	21.3179	-0.931989	0.0274015	0.0760468	-27.452	24.6093	-0.234677	0.0455301	0.0687936	-34.9847	25.7789	-0.363971	0.0832458	0.116334	-34.4732	30.3366	-0.640697	0.0624608	0.110483	-27.4345	21.2608	-0.418694	0.0310961	0.0480296	0	0	0	0	0	216	86.4	-30.068	20.1051	-1.63445
-26.3184	5.61521	-3.3477	0	0.1651	-34.0248	23.489	-4.6776	0.0367251	0.253032	-57.9403	24.8043	-4.42029	0.0229592	0.18463	-31.0312	21.8748	-0.875763	0.0264778	0.0692734	-26.8769	24.6289	-0.183882	0.0451977	0.070123	-33.8145	28.4936	-0.28015	0.0913866	0.121061	-34.3171	29.8975	-0.583307	0.0630885	0.106089	-26.2891	22.1425	-0.341353	0.0283251	0.0406404	0	0	0	0	0	217	86.8	-29.7403	20.7903	-1.59214
-26.5463	6.47449	-3.31986	0	0.164787	-33.4998	22.3624	-4.61399	0.0347035	0.25	-57.8783	26.0145	-4.42008	0.0223214	0.185906	-30.8984	22.4316	-0.820994	0.0274015	0.067734	-26.3019	24.6485	-0.149941	0.0495181	0.0707876	-32.9506	32.3987	-0.203906	0.103204	0.121849	-34.161	29.4584	-0.525185	0.0646579	0.10295	-25.4267	23.3244	-0.275308	0.0320197	0.0400246	0	0	0	0	0	218	87.2	-29.9151	21.9612	-1.54944
-26.7741	7.33377	-3.29421	0	0.165414	-32.9805	24.2789	-4.54549	0.0333558	0.244272	-58.2601	27.2247	-4.41828	0.0251913	0.182398	-30.7655	23.6501	-0.786197	0.0307882	0.0717365	-25.7268	24.8932	-0.109831	0.0608175	0.0704553	-35.9861	36.3038	-0.139582	0.115546	0.127101	-34.093	29.0193	-0.459699	0.064344	0.0957313	-24.6502	24.9472	-0.191702	0.0326355	0.0381773	0	0	0	0	0	219	87.6	-30.2553	23.3423	-1.50174
-27.0019	8.2807	-3.26669	0	0.164787	-32.9689	26.4509	-4.46952	0.0313342	0.235175	-59.0174	28.4349	-4.42701	0.0280612	0.18176	-30.6327	25.349	-0.725963	0.0344828	0.0791256	-25.4363	25.6456	-0.0638635	0.0687936	0.0747757	-39.0217	40.2089	-0.0532682	0.129989	0.130252	-34.1927	28.9795	-0.389984	0.0671689	0.0957313	-24.0263	26.7316	-0.119352	0.0369458	0.0400246	0	0	0	0	0	220	88	-31.1546	24.7899	-1.45322
-28.0843	9.23773	-3.24015	0	0.166353	-33.4615	28.7853	-4.39879	0.0309973	0.23248	-61.8751	29.6439	-4.42916	0.0306122	0.182079	-30.4986	27.432	-0.671077	0.0483374	0.0874384	-26.0772	26.3971	-0.00789629	0.0754403	0.0820871	-42.0545	44.113	0.0428703	0.142857	0.136555	-34.291	28.9852	-0.330915	0.0725047	0.094162	-24.0493	28.5145	-0.0438571	0.044335	0.0449507	0	0	0	0	0	221	88.4	-29.7864	24.3302	-1.43108
-27.894	8.62761	-3.25128	0	0.1651	-31.6958	27.3721	-4.35992	0.0299865	0.230121	-61.0911	28.8764	-4.41639	0.0258291	0.183036	-27.7708	27.8998	-0.553236	0.0458744	0.0769704	-25.8536	25.386	0.049459	0.0744433	0.079096	-39.5798	46.0577	0.199655	0.137868	0.130777	-31.3576	27.7026	-0.453527	0.066855	0.0897677	-22.8353	27.0498	-0.0944741	0.0366379	0.044335	0	0	0	0	0	222	88.8	-28.8048	23.8916	-1.40954
-27.7037	8.0175	-3.26092	0	0.168546	-32.9614	25.9588	-4.33342	0.0286388	0.227426	-60.307	28.2283	-4.40062	0.0242347	0.18176	-25.043	28.3675	-0.455032	0.0471059	0.0668103	-25.6301	24.3749	0.105676	0.072117	0.0787637	-37.1605	48.0024	0.378787	0.134191	0.125	-28.4242	26.4555	-0.576413	0.0615191	0.084118	-22.0132	25.6199	-0.143879	0.0357143	0.0406404	0	0	0	0	0	223	89.2	-28.6206	23.4992	-1.38959
-27.676	7.80805	-3.27178	0	0.16792	-34.747	24.5456	-4.30877	0.0286388	0.220013	-59.523	27.5801	-4.38201	0.0248724	0.180166	-24.3722	28.8352	-0.365532	0.0498768	0.0581897	-25.4065	23.3638	0.176418	0.076105	0.077102	-37.2079	49.9471	0.541167	0.131828	0.120798	-27.3737	25.2085	-0.701751	0.0571249	0.0850596	-21.2792	24.2045	-0.194033	0.0369458	0.0409483	0	0	0	0	0	224	89.6	-29.2156	23.1759	-1.36984
-28.0799	7.93485	-3.27994	0	0.16792	-36.5326	23.1323	-4.28698	0.0269542	0.216307	-58.739	26.9319	-4.36735	0.0239158	0.184311	-24.768	29.3029	-0.26745	0.0514163	0.0541872	-25.183	22.4513	0.223245	0.079096	0.0757727	-39.8533	52.0792	0.709319	0.130515	0.117647	-28.4193	23.9615	-0.811277	0.0596359	0.08914	-21.3656	22.7892	-0.248097	0.0381773	0.0480296	0	0	0	0	0	225	90	-29.9024	22.9799	-1.34627
-28.4838	8.06166	-3.28773	0	0.16604	-38.3183	21.7191	-4.25448	0.0269542	0.213949	-58.6138	26.3639	-4.35705	0.0239158	0.184949	-25.3306	30.191	-0.159705	0.0544951	0.0557266	-24.9594	21.6497	0.287726	0.0844134	0.078099	-42.4987	54.7457	0.897024	0.138393	0.118172	-29.4649	22.7144	-0.935876	0.0615191	0.0951036	-21.4519	21.3739	-0.306307	0.0397167	0.0529557	0	0	0	0	0	226	90.4	-30.801	23.0436	-1.32358
-28.8877	8.18846	-3.2966	0	0.161967	-40.1039	20.3059	-4.21806	0.027628	0.212601	-60.1812	26.1245	-4.34266	0.0251913	0.182079	-25.8931	31.373	-0.0745251	0.0606527	0.0609606	-24.7358	20.8481	0.361106	0.0887338	0.079096	-45.1441	57.4122	1.07342	0.148109	0.117647	-30.7247	21.4674	-1.05093	0.0630885	0.100126	-21.5383	21.6727	-0.36395	0.0418719	0.057266	0	0	0	0	0	227	90.8	-31.901	23.7891	-1.29986
-29.4434	8.35422	-3.30347	0	0.161028	-41.8896	20.0024	-4.19948	0.0309973	0.209906	-62.8994	25.8851	-4.3115	0.0274235	0.181441	-26.5941	32.5551	0.0312405	0.0631158	0.0634236	-24.5123	21.0964	0.42263	0.0907278	0.0850781	-47.7894	60.0786	1.24287	0.158613	0.119485	-32.1095	22.0938	-1.16748	0.0621469	0.104206	-21.871	24.0367	-0.413565	0.0427956	0.0643473	0	0	0	0	0	228	91.2	-33.4862	25.2062	-1.28228
-30.5232	8.81838	-3.31807	0	0.161028	-43.7915	20.7852	-4.16998	0.0336927	0.208895	-65.6177	25.6457	-4.2889	0.0322066	0.176339	-27.5279	33.7372	0.105491	0.0674261	0.0692734	-24.2887	22.8339	0.478573	0.10236	0.0857428	-50.4348	62.9654	1.40704	0.171481	0.122374	-34.2553	25.6693	-1.28081	0.064344	0.110483	-24.9368	26.4006	-0.473855	0.0449507	0.0735837	0	0	0	0	0	229	91.6	-35.3333	26.6904	-1.25837
-31.603	9.28253	-3.32698	0	0.159148	-45.733	21.7163	-4.1486	0.0441375	0.209906	-69.0255	25.4063	-4.28836	0.0357143	0.172832	-28.4617	34.9192	0.206871	0.0760468	0.0748153	-25.2199	24.9401	0.560034	0.109671	0.0897308	-53.0802	65.9396	1.61455	0.186187	0.126313	-36.8736	29.2449	-1.41228	0.0674827	0.11268	-28.0025	28.7645	-0.530532	0.0474138	0.0797414	0	0	0	0	0	230	92	-24.8002	14.1273	-1.43905
-32.9451	9.86339	-3.33515	0	0.158208	-48.6971	22.7072	-4.11766	0.0515499	0.212264	-72.6741	25.5619	-4.27871	0.0360332	0.167092	-29.3945	36.1939	0.306356	0.091133	0.0794335	0	0	0	0	0	0	0	0	0	0	-39.4911	32.8195	-1.52624	0.0743879	0.127119	0	0	0	0	0	0	0	0	0	0	231	92.4	-23.8965	14.0348	-1.3948
-31.7241	10.967	-3.26478	0.000626566	0.158521	-46.9076	21.9943	-4.03328	0.0498652	0.210243	-67.4367	26.5051	-4.09294	0.0357143	0.167092	-28.5124	32.5269	0.284143	0.0889778	0.0748153	0	0	0	0	0	0	0	0	0	0	-40.4881	34.32	-1.44638	0.0721908	0.11833	0	0	0	0	0	0	0	0	0	0	232	92.8	-23.0221	14.1067	-1.35758
-30.7665	12.0707	-3.20258	0.00156642	0.155388	-45.1181	21.2814	-3.96116	0.0485175	0.207884	-62.1992	28.4192	-3.94639	0.033801	0.162946	-27.6303	28.9066	0.264176	0.085899	0.0705049	0	0	0	0	0	0	0	0	0	0	-41.4852	36.2824	-1.37231	0.0690521	0.11425	0	0	0	0	0	0	0	0	0	0	233	93.2	-22.2791	14.2327	-1.31063
-30.5359	13.1743	-3.12997	0.00281955	0.149749	-43.3872	20.5685	-3.87779	0.0468329	0.206199	-56.9617	30.503	-3.76703	0.0334821	0.165816	-26.7482	25.3106	0.265304	0.0880542	0.0680419	0	0	0	0	0	0	0	0	0	0	-42.8785	38.5377	-1.28614	0.0655995	0.114878	0	0	0	0	0	0	0	0	0	0	234	93.6	-21.6884	14.5137	-1.27031
-30.381	14.2779	-3.06613	0.00313283	0.142231	-42.4089	20.2365	-3.79488	0.0458221	0.204515	-51.9419	32.5868	-3.60148	0.0331633	0.168367	-25.9076	22.7292	0.234046	0.0905172	0.0689655	0	0	0	0	0	0	0	0	0	0	-44.5562	40.793	-1.20433	0.064344	0.113622	0	0	0	0	0	0	0	0	0	0	235	94	-21.2397	15.2489	-1.22643
-30.226	15.3816	-2.99625	0.0037594	0.140664	-41.6629	21.2087	-3.72157	0.0451482	0.204515	-46.9758	34.9504	-3.43811	0.0341199	0.168686	-26.0577	22.6506	0.223804	0.0948276	0.0757389	0	0	0	0	0	0	0	0	0	0	-46.2348	43.0484	-1.10572	0.0649718	0.113622	0	0	0	0	0	0	0	0	0	0	236	94.4	-21.1519	16.0902	-1.1868
-30.071	16.4852	-2.93538	0.00501253	0.138158	-40.9168	22.2778	-3.64269	0.046496	0.205189	-42.0097	37.8426	-3.27936	0.0360332	0.168686	-28.9741	22.5721	0.206933	0.100062	0.0828202	0	0	0	0	0	0	0	0	0	0	-48.3957	45.6339	-1.03072	0.0696798	0.111739	0	0	0	0	0	0	0	0	0	0	237	94.8	-21.3884	17.1274	-1.14595
-29.9161	17.5888	-2.87325	0.00501253	0.135025	-40.3494	23.3468	-3.57562	0.046159	0.199798	-39.7832	40.7349	-3.10549	0.0379464	0.166773	-31.8905	23.811	0.191549	0.101909	0.0899015	0	0	0	0	0	0	0	0	0	0	-50.5567	48.6653	-0.950744	0.0765851	0.113622	0	0	0	0	0	0	0	0	0	0	238	95.2	-22.0943	18.2307	-1.10379
-29.7611	18.6925	-2.80992	0.00595238	0.135338	-40.5109	24.5847	-3.49581	0.0491914	0.198787	-40.614	43.6271	-2.94659	0.0404974	0.16486	-35.2452	25.4754	0.178902	0.107143	0.0942118	0	0	0	0	0	0	0	0	0	0	-52.7176	51.6967	-0.860681	0.0828625	0.115191	0	0	0	0	0	0	0	0	0	0	239	95.6	-22.8049	19.3808	-1.06326
-29.6062	19.7961	-2.74262	0.00595238	0.133459	-40.6724	26.0121	-3.43028	0.0512129	0.197439	-41.4447	46.751	-2.77334	0.0440051	0.160077	-38.6424	27.1398	0.16195	0.112069	0.0985222	0	0	0	0	0	0	0	0	0	0	-54.8786	54.7281	-0.785017	0.0853735	0.118016	0	0	0	0	0	0	0	0	0	0	240	96	-17.2093	14.1323	-0.942778
-29.4509	20.8988	-2.67228	0.00783208	0.135338	-41.0781	27.5613	-3.34395	0.0545822	0.194744	-42.3188	49.9263	-2.61054	0.0487883	0.157844	-42.0363	28.8039	0.141765	0.11915	0.104372	0	0	0	0	0	0	0	0	0	0	0	0	0	0	0	0	0	0	0	0	0	0	0	0	0	241	96.4	-16.4799	13.6408	-0.911773
-28.7528	20.3402	-2.61508	0.00877193	0.138158	-40.8996	27.2171	-3.27786	0.0502022	0.192049	-39.1571	45.2416	-2.58699	0.0455995	0.157207	-39.5093	29.9686	0.27397	0.117611	0.100369	0	0	0	0	0	0	0	0	0	0	0	0	0	0	0	0	0	0	0	0	0	0	0	0	0	242	96.8	-15.9932	13.1507	-0.880503
-28.0547	19.7815	-2.56619	0.00971178	0.138471	-40.8158	26.8728	-3.21628	0.0478437	0.192049	-38.0859	40.5569	-2.57192	0.0452806	0.155293	-36.9822	31.1449	0.429861	0.116379	0.0994458	0	0	0	0	0	0	0	0	0	0	0	0	0	0	0	0	0	0	0	0	0	0	0	0	0	243	97.2	-15.539	12.7066	-0.848408
-27.3566	19.2229	-2.51365	0.0109649	0.139724	-40.7319	26.5286	-3.15757	0.0488544	0.190027	-37.3069	35.8722	-2.53718	0.0427296	0.153699	-34.4552	32.7356	0.57273	0.119766	0.0982143	0	0	0	0	0	0	0	0	0	0	0	0	0	0	0	0	0	0	0	0	0	0	0	0	0	244	97.6	-15.3876	12.2808	-0.821394
-26.6585	18.7489	-2.46043	0.0112782	0.142857	-40.6481	26.1843	-3.11029	0.0522237	0.190364	-39.2536	31.1875	-2.51017	0.0395408	0.15338	-31.9281	34.4063	0.68834	0.121613	0.100677	0	0	0	0	0	0	0	0	0	0	0	0	0	0	0	0	0	0	0	0	0	0	0	0	0	245	98	-15.4248	11.8667	-0.790803
-25.9604	18.3804	-2.39688	0.0115915	0.143797	-40.5643	25.8401	-3.04407	0.0549191	0.189016	-41.2911	26.5028	-2.47889	0.0427296	0.151786	-31.0074	36.077	0.802617	0.125924	0.101601	0	0	0	0	0	0	0	0	0	0	0	0	0	0	0	0	0	0	0	0	0	0	0	0	0	246	98.4	-15.7224	11.7794	-0.759223
-25.2623	18.0119	-2.34477	0.0137845	0.14317	-40.8084	25.4959	-2.9796	0.0592992	0.181941	-43.3285	24.7594	-2.45926	0.044324	0.149554	-32.1026	37.7478	0.950626	0.133929	0.101909	0	0	0	0	0	0	0	0	0	0	0	0	0	0	0	0	0	0	0	0	0	0	0	0	0	247	98.8	-16.036	12.4287	-0.726478
-24.5642	17.6434	-2.2884	0.014411	0.144424	-41.1083	26.4923	-2.92712	0.0630054	0.181267	-45.4532	28.3039	-2.42575	0.0471939	0.144452	-33.1979	39.4185	1.10298	0.144089	0.108067	0	0	0	0	0	0	0	0	0	0	0	0	0	0	0	0	0	0	0	0	0	0	0	0	0	248	99.2	-16.4311	13.3846	-0.697787
-24.1807	17.2749	-2.23646	0.0156642	0.143797	-41.6672	29.5645	-2.86457	0.0680593	0.182951	-47.6656	32.5323	-2.39818	0.0510204	0.146046	-34.3662	41.0893	1.21913	0.156712	0.109298	0	0	0	0	0	0	0	0	0	0	0	0	0	0	0	0	0	0	0	0	0	0	0	0	0	249	99.6	-17.006	14.3939	-0.667307
-25.0195	16.9064	-2.1818	0.018797	0.142857	-42.2318	33.1082	-2.80921	0.0734501	0.186995	-49.878	36.7708	-2.37396	0.0554847	0.147321	-35.9243	42.76	1.3592	0.166872	0.1133	0	0	0	0	0	0	0	0	0	0	0	0	0	0	0	0	0	0	0	0	0	0	0	0	0
[truncated: 7 more columns]

## Sheet: 3
P1					P2					P3					P4					P5					P6					P7					P8					P9							min	max	avg
min	max	avg	ccw [%]	cw [%]	min	max	avg	ccw [%]	cw [%]	min	max	avg	ccw [%]	cw [%]	min	max	avg	ccw [%]	cw [%]	min	max	avg	ccw [%]	cw [%]	min	max	avg	ccw [%]	cw [%]	min	max	avg	ccw [%]	cw [%]	min	max	avg	ccw [%]	cw [%]	min	max	avg	ccw [%]	cw [%]	0	0	-49.9951	44.9777	-0.821754
-25.007	19.1494	-2.43662	0.0232213	0.150198	-63.934	34.5268	-1.23408	0.0857372	0.136619	-66.4392	44.5735	-1.44613	0.0840875	0.107089	-50.3503	55.7931	1.8166	0.221016	0.164568	-26.0814	24.7389	-0.34883	0.0807547	0.0950943	-62.6045	81.1309	-0.702159	0.247283	0.283062	-61.4698	70.7715	-2.22256	0.110735	0.202611	-31.5878	33.9046	-0.43042	0.0781145	0.1	-62.482	40.2106	-0.391596	0.171614	0.173469	1	0.4	-46.4435	41.5731	-0.89383
-24.0373	15.3026	-2.51778	0.013834	0.149704	-62.528	34.9387	-1.25813	0.0809295	0.135016	-58.8579	37.755	-1.34335	0.0776772	0.102941	-47.7997	50.7315	1.66287	0.213634	0.1637	-25.0395	22.7236	-0.512782	0.0735849	0.100755	-58.6527	74.5312	-0.801178	0.236413	0.279891	-56.7827	68.998	-2.10748	0.098646	0.193907	-30.3364	31.3718	-0.608344	0.0713805	0.111111	-53.957	37.8052	-0.558296	0.159091	0.182746	2	0.8	-43.0741	39.0607	-0.971462
-24.2271	11.8604	-2.60616	0.00543478	0.144763	-61.1219	35.3507	-1.28807	0.0761218	0.131811	-51.2767	31.1749	-1.21589	0.0693816	0.0991704	-45.2491	45.6699	1.48528	0.198003	0.163265	-24.4785	23.5297	-0.680124	0.0664151	0.109811	-54.7008	68.3244	-0.928506	0.230072	0.276721	-52.0957	67.2245	-1.97754	0.0923598	0.194391	-29.0851	30.9081	-0.780356	0.0659933	0.117845	-45.432	37.5041	-0.751796	0.153525	0.191095	3	1.2	-40.9142	37.6279	-1.05211
-25.0672	10.1081	-2.68107	0.000494071	0.147233	-59.7158	35.7626	-1.32159	0.0705128	0.130208	-46.1656	24.9348	-1.12601	0.0633484	0.091629	-44.4095	45.2276	1.30543	0.184108	0.158923	-25.0429	24.7753	-0.845533	0.0603774	0.113962	-50.8823	62.3027	-1.0631	0.224185	0.278986	-47.4182	65.451	-1.8353	0.0962282	0.189555	-27.8337	31.2098	-0.97106	0.0612795	0.128283	-41.6926	38.8791	-0.930711	0.154917	0.195733	4	1.6	-42.1398	37.5463	-1.12877
-26.1005	10.3467	-2.75939	0.000988142	0.148715	-58.3097	36.1746	-1.32282	0.0657051	0.125	-43.2437	21.5755	-1.0214	0.0527903	0.0829563	-45.4655	45.9724	1.11581	0.1802	0.155015	-27.9943	27.4934	-1.0163	0.0573585	0.12	-54.4596	58.1381	-1.19432	0.223732	0.288496	-44.7573	63.7052	-1.68716	0.101064	0.189555	-26.5823	31.8513	-1.15095	0.052862	0.132323	-52.3453	42.6596	-1.12238	0.150742	0.19666	5	2	-43.5442	39.2331	-1.21312
-27.1339	10.966	-2.84706	0.00296443	0.145257	-56.9037	36.5865	-1.34442	0.0600962	0.122196	-41.4663	25.1208	-0.921337	0.0512821	0.0780543	-46.5215	47.1682	0.926809	0.166739	0.149805	-30.9457	30.5963	-1.17433	0.0588679	0.122642	-58.0988	59.2931	-1.37939	0.232337	0.294837	-42.0964	62.5815	-1.58699	0.111219	0.191489	-25.7338	32.4928	-1.3227	0.0481481	0.135354	-62.998	48.293	-1.26863	0.153525	0.19666	6	2.4	-45.2986	41.2674	-1.3046
-28.1672	12.5509	-2.92138	0.00790514	0.146245	-55.4976	36.9984	-1.36763	0.0592949	0.119792	-39.9836	28.6661	-0.831733	0.0486425	0.0780543	-47.5774	49.6339	0.743078	0.154147	0.147199	-33.8971	33.7129	-1.36291	0.0596226	0.129434	-61.7381	60.4482	-1.54841	0.23913	0.306612	-39.4355	61.4578	-1.50655	0.123791	0.195358	-27.7401	33.1343	-1.51076	0.0468013	0.136027	-73.6508	54.8043	-1.43511	0.155844	0.190631	7	2.8	-47.2915	43.5136	-1.38449
-29.6203	14.5409	-3.01753	0.0108696	0.147727	-54.0915	37.4104	-1.39987	0.0600962	0.120994	-38.7727	32.7089	-0.74672	0.0524133	0.0825792	-48.7195	52.0996	0.564601	0.147634	0.14416	-36.8485	36.8295	-1.54016	0.0611321	0.138868	-65.3773	61.6032	-1.68345	0.248641	0.31567	-37.0288	60.3342	-1.33638	0.133946	0.194391	-30.8618	33.7758	-1.70045	0.0451178	0.136364	-84.3035	62.3198	-1.60045	0.165584	0.18692	8	3.2	-49.9531	46.4736	-1.46377
-31.3378	16.7356	-3.08992	0.0133399	0.149704	-52.6854	37.8223	-1.4449	0.0580929	0.124199	-38.5648	42.9715	-0.633387	0.0558069	0.0863499	-50.0406	54.5652	0.382599	0.138515	0.140686	-39.7999	39.9461	-1.71796	0.0683019	0.147925	-69.0165	62.7583	-1.83319	0.254529	0.323822	-38.6167	59.2105	-1.20023	0.144101	0.194391	-33.9834	34.4172	-1.88939	0.043771	0.138384	-95.5325	69.8354	-1.7476	0.170686	0.195269	9	3.6	-53.0772	49.5232	-1.54138
-33.0554	19.0595	-3.16095	0.0153162	0.157609	-51.2794	38.2343	-1.4699	0.0645032	0.129006	-38.9046	53.6723	-0.538063	0.0607089	0.0904977	-51.3617	57.2707	0.217153	0.135475	0.140252	-42.7513	43.0628	-1.89706	0.0743396	0.156604	-72.6558	63.9134	-1.9931	0.261775	0.341033	-43.6674	58.0868	-1.0542	0.153772	0.198743	-37.105	35.0587	-2.06524	0.0427609	0.140404	-106.915	77.3509	-1.91109	0.179499	0.200371	10	4	-56.9967	52.6998	-1.6241
-35.2847	21.3834	-3.24758	0.0192688	0.163538	-49.8733	38.6462	-1.49778	0.0709135	0.133814	-44.8717	64.373	-0.432698	0.0674962	0.0935143	-52.6827	60.3772	0.0482935	0.134607	0.142857	-45.7027	46.1793	-2.07191	0.0796226	0.166038	-76.295	65.5298	-2.16213	0.269928	0.351902	-49.6767	57.2431	-0.919395	0.161992	0.207447	-40.2861	35.7002	-2.23693	0.0427609	0.144108	-118.297	84.8664	-2.09679	0.187848	0.205009	11	4.4	-56.4824	49.4063	-1.91276
-35.4352	20.2394	-3.15299	0.0167984	0.158103	-44.2165	35.4727	-1.63316	0.0604968	0.135016	-42.5833	65.0502	-0.560947	0.0671192	0.0972851	-50.1778	52.7711	-0.00202769	0.12462	0.131568	-42.5851	42.7896	-1.91729	0.0762264	0.16	-70.1326	59.2684	-2.65461	0.245018	0.341938	-47.6347	53.5175	-1.75424	0.148453	0.242263	-50.856	32.9374	-2.72817	0.0380471	0.141751	-124.72	82.6103	-2.81141	0.179499	0.21243	12	4.8	-57.3423	46.2767	-2.19631
-35.5856	19.0955	-3.05198	0.0148221	0.155632	-38.5597	32.2991	-1.76668	0.0540865	0.143029	-46.3645	65.7274	-0.672749	0.0648567	0.0991704	-47.6729	45.8897	-0.022124	0.118975	0.120712	-39.4674	39.3999	-1.78372	0.0777358	0.153962	-64.5718	53.007	-3.1688	0.220562	0.32971	-45.5926	49.792	-2.56499	0.133946	0.242263	-61.4853	30.1746	-3.1893	0.0323232	0.13771	-136.781	81.1051	-3.5464	0.169295	0.220315	13	5.2	-59.5854	44.1388	-2.49698
-35.736	17.9515	-2.97719	0.0133399	0.154644	-32.9029	29.1256	-1.89533	0.0480769	0.142628	-51.989	66.7143	-0.844418	0.0607089	0.100679	-45.168	43.8183	-0.0684122	0.114199	0.114199	-37.5108	36.2549	-1.65721	0.0818868	0.149057	-61.2886	49.0662	-3.66283	0.213315	0.324275	-50.717	46.0665	-3.43314	0.120406	0.239362	-72.1146	27.4118	-3.66048	0.0309764	0.130303	-148.842	80.8399	-4.27383	0.164657	0.225881	14	5.6	-64.3574	42.7039	-2.77947
-35.8865	16.916	-2.893	0.0113636	0.150198	-30.3663	25.9521	-2.01821	0.046875	0.146234	-58.0574	67.9885	-0.965829	0.0607089	0.104827	-42.6631	42.3879	-0.0950469	0.11333	0.112462	-39.2429	33.3427	-1.51414	0.0879245	0.147547	-66.4234	49.7978	-4.12792	0.205163	0.333333	-62.5656	42.3409	-4.2575	0.107834	0.237911	-83.1096	24.649	-4.14564	0.0323232	0.132323	-160.902	80.9601	-4.99792	0.159091	0.231911	15	6	-69.5011	41.5317	-3.05524
-36.0369	16.1228	-2.80763	0.0103755	0.146245	-29.9941	22.7785	-2.16089	0.0448718	0.149038	-64.1257	69.2627	-1.09541	0.0592006	0.107089	-40.1582	40.9576	-0.129547	0.112462	0.117673	-40.975	30.4304	-1.36411	0.089434	0.144151	-72.372	50.7093	-4.55276	0.201087	0.342391	-74.6805	40.4237	-5.06818	0.103482	0.249033	-94.2048	21.8863	-4.60073	0.0329966	0.13569	-172.963	81.2139	-5.71786	0.153061	0.238868	16	6.4	-74.8017	41.2247	-3.34841
-36.6016	15.3296	-2.71477	0.0177866	0.144269	-29.6218	20.7243	-2.28331	0.0424679	0.146234	-70.194	70.537	-1.2141	0.0569382	0.112368	-37.6532	39.9915	-0.170308	0.10812	0.118975	-42.7071	27.6796	-1.23998	0.090566	0.140377	-78.3207	52.2003	-5.08748	0.195199	0.350996	-87.3065	39.4961	-5.91419	0.108801	0.252418	-105.787	22.4382	-5.06374	0.0333333	0.141414	-185.023	82.6256	-6.44779	0.151206	0.239796	17	6.8	-80.717	41.8479	-3.63382
-37.2692	14.5364	-2.63723	0.0222332	0.13834	-29.2496	21.3689	-2.41526	0.0440705	0.143029	-76.2623	71.8112	-1.32641	0.0565611	0.115762	-39.8548	39.8391	-0.199661	0.105515	0.124186	-44.4392	27.5545	-1.09258	0.089434	0.138113	-84.2693	53.6914	-5.57144	0.201087	0.346014	-100.368	39.039	-6.69873	0.115087	0.255803	-117.657	24.7532	-5.5404	0.0350168	0.148485	-197.084	84.0373	-7.22264	0.148887	0.236549	18	7.2	-86.901	43.6782	-3.93377
-37.9368	16.4795	-2.5507	0.0286561	0.143775	-29.427	23.8763	-2.53482	0.0420673	0.146635	-82.3307	73.0854	-1.46517	0.0603318	0.119532	-43.2797	41.0341	-0.235425	0.109857	0.131133	-46.1713	31.5354	-0.977555	0.0883019	0.13283	-90.218	55.1825	-6.12493	0.199728	0.347826	-114.049	38.7943	-7.55164	0.128143	0.262089	-129.552	27.6675	-6.00921	0.0353535	0.157576	-209.145	85.4489	-7.95444	0.148887	0.232839	19	7.6	-93.3253	46.1064	-4.21658
-38.6045	18.925	-2.44686	0.0316206	0.143775	-31.3584	26.9227	-2.65841	0.0408654	0.153446	-88.399	74.3597	-1.59759	0.0607089	0.125189	-46.7045	43.3114	-0.260317	0.127225	0.139383	-47.9034	35.8594	-0.862185	0.0883019	0.126415	-96.1666	56.6736	-6.56566	0.197464	0.360054	-127.731	41.3595	-8.38944	0.139749	0.26499	-141.855	30.5819	-6.4892	0.0383838	0.162626	-221.205	86.9643	-8.67954	0.146568	0.227273	20	8	-99.9169	49.1511	-4.4995
-39.2721	21.3706	-2.35753	0.034585	0.146245	-34.5605	29.969	-2.78062	0.041266	0.163061	-94.4673	75.6339	-1.73635	0.0652338	0.129336	-50.1293	45.7524	-0.308035	0.144594	0.155449	-49.6355	40.2494	-0.742532	0.0860377	0.114717	-102.352	58.1646	-7.06137	0.203804	0.361866	-141.412	48.4455	-9.19315	0.147002	0.264507	-154.158	33.4963	-6.94125	0.0481481	0.16936	-233.266	89.2783	-9.3747	0.147032	0.226345	21	8.4	-102.727	46.5009	-4.90431
-38.9511	19.3866	-2.60529	0.0311265	0.150198	-33.1649	25.2137	-2.69195	0.0352564	0.155449	-83.7001	67.3679	-1.80711	0.0637255	0.129713	-62.1469	43.32	-1.24724	0.130265	0.172384	-55.7334	38.3631	-0.852614	0.0811321	0.103396	-101.603	54.005	-7.22192	0.191123	0.357337	-153.378	53.6118	-10.1476	0.15087	0.269342	-161.723	36.0267	-7.48657	0.0481481	0.175084	-234.138	81.2133	-10.0785	0.17115	0.233302	22	8.8	-107.065	45.139	-5.32474
-41.062	17.4189	-2.85999	0.0261858	0.155138	-31.8802	20.4583	-2.61907	0.0388622	0.157051	-72.9329	59.1019	-1.90745	0.061463	0.129713	-75.3676	41.1999	-2.14054	0.110291	0.184976	-61.8313	41.6245	-0.975939	0.0807547	0.0901887	-107.287	52.6869	-7.40678	0.192029	0.348279	-167.831	58.7781	-11.1501	0.151354	0.278046	-169.288	38.9866	-8.01487	0.0474747	0.182155	-236.109	75.9961	-10.8479	0.197124	0.241187	23	9.2	-112.839	46.0287	-5.74949
-43.1984	15.7945	-3.1037	0.020751	0.158597	-30.6681	22.3518	-2.53252	0.0360577	0.160256	-66.9852	51.2349	-2.04407	0.0542986	0.131976	-88.5883	39.9748	-3.07497	0.0976987	0.196266	-67.9292	44.8859	-1.13342	0.0796226	0.0826415	-115.918	55.5053	-7.62296	0.211051	0.347826	-184.619	63.9444	-12.1317	0.158607	0.282398	-176.854	42.6968	-8.54668	0.0464646	0.190236	-240.788	77.8695	-11.5554	0.220779	0.250928	24	9.6	-120.719	48.7355	-6.17484
-45.3348	14.1701	-3.36974	0.0167984	0.162549	-29.4561	29.1416	-2.45617	0.0344551	0.165465	-75.158	54.6861	-2.1342	0.0531674	0.130845	-101.809	38.7971	-4.03048	0.0968302	0.2132	-74.0272	48.1472	-1.28732	0.0803774	0.0871698	-126.804	58.4167	-7.79485	0.225543	0.352808	-201.529	69.1107	-13.0888	0.166344	0.280464	-185.5	46.407	-9.06584	0.0488215	0.19697	-246.853	79.7428	-12.3461	0.22449	0.258813	25	10	-128.996	51.7546	-6.5865
-47.4712	12.5539	-3.61385	0.0133399	0.170949	-30.193	36.2328	-2.37061	0.0364583	0.173077	-83.3308	58.1373	-2.23223	0.0437406	0.122926	-115.837	38.8646	-4.99617	0.102475	0.23274	-80.1251	51.4086	-1.4383	0.0788679	0.0928302	-137.689	61.7319	-7.97892	0.233243	0.354167	-218.968	74.277	-13.9954	0.173598	0.275145	-194.433	50.969	-9.59876	0.0505051	0.208081	-252.919	81.6162	-13.0542	0.227273	0.264378	26	10.4	-138.291	55.7939	-7.01298
-49.6076	12.3123	-3.85597	0.00988142	0.175395	-34.3907	43.331	-2.28059	0.0544872	0.183494	-91.834	61.5885	-2.32185	0.0399698	0.108597	-130.277	40.2706	-5.95589	0.108988	0.247937	-86.223	54.67	-1.57293	0.0803774	0.101887	-148.574	65.1799	-8.16307	0.247283	0.350543	-237.454	79.4433	-15.0103	0.182785	0.27853	-203.366	55.662	-10.1305	0.0525253	0.216835	-262.888	89.6878	-13.8257	0.2282	0.273191	27	10.8	-147.812	60.7786	-7.43073
-51.744	12.1036	-4.11287	0.00790514	0.1833	-38.6573	50.4292	-2.20098	0.0689103	0.189904	-100.993	65.0397	-2.4148	0.0350679	0.0995475	-145.312	42.3855	-6.89888	0.11637	0.256622	-92.3209	58.0797	-1.70359	0.0830189	0.111321	-160.095	68.628	-8.32456	0.259058	0.360054	-255.941	84.6097	-16.0318	0.189072	0.283849	-212.299	61.0367	-10.6528	0.0548822	0.225589	-272.949	104.696	-14.5363	0.230983	0.275974	28	11.2	-157.857	66.0245	-7.85803
-53.8804	12.0076	-4.35305	0.00592885	0.193182	-43.2112	57.5274	-2.13547	0.0877404	0.195913	-110.152	68.4909	-2.50918	0.0294118	0.0923831	-160.831	44.8672	-7.83984	0.114633	0.264438	-98.4189	61.7444	-1.88549	0.090566	0.123019	-172.261	72.076	-8.50993	0.258605	0.365489	-274.427	90.6123	-17.018	0.198259	0.285783	-221.459	67.1099	-11.1706	0.0572391	0.23064	-286.075	119.785	-15.3008	0.233766	0.28154	29	11.6	-168.021	72.1311	-8.27105
-56.0244	11.989	-4.58926	0.00494071	0.201087	-47.7651	64.6256	-2.04518	0.101763	0.199119	-119.31	71.9421	-2.59	0.040724	0.0961538	-176.35	47.3488	-8.78983	0.121146	0.276596	-104.517	65.7987	-2.00825	0.0988679	0.133208	-184.428	82.6593	-8.66961	0.268569	0.370018	-292.914	96.7591	-17.9669	0.210348	0.289168	-230.987	73.1832	-11.7098	0.0572391	0.23569	-299.894	134.874	-16.0707	0.233302	0.284787	30	12	-178.493	78.2808	-8.69321
-58.3712	12.1532	-4.84145	0.00543478	0.20504	-52.319	71.7238	-1.96664	0.113782	0.203526	-128.469	75.3933	-2.67899	0.0497738	0.100679	-191.869	49.8305	-9.74321	0.122883	0.280504	-110.615	69.9108	-2.13796	0.106038	0.139623	-196.595	93.3902	-8.85423	0.280797	0.377264	-311.797	102.906	-18.9569	0.222437	0.29352	-240.975	79.2565	-12.2267	0.0592593	0.240067	-315.426	149.963	-16.8328	0.230983	0.292208	31	12.4	-179.01	76.633	-8.99561
-56.3546	10.9359	-5.15377	0.00197628	0.211462	-61.5815	73.6151	-2.52402	0.115785	0.215545	-131.681	68.2158	-2.9884	0.0475113	0.10822	-190.124	45.975	-10.7273	0.129831	0.284846	-118.544	68.9404	-2.63061	0.105283	0.144906	-193.398	93.6331	-9.25445	0.282609	0.370018	-309.229	101.467	-19.1453	0.225822	0.294487	-237.73	80.3157	-11.8273	0.0616162	0.232323	-312.45	146.599	-16.7093	0.231911	0.292208	32	12.8	-179.909	74.9939	-9.28902
-54.3893	9.71859	-5.46323	0	0.226779	-70.8441	75.5063	-3.08331	0.117388	0.223157	-134.892	61.1176	-3.29735	0.0478884	0.11086	-188.38	42.1195	-11.7275	0.134607	0.293096	-126.472	67.97	-3.12213	0.106792	0.149434	-193.122	93.8761	-9.60271	0.291214	0.355525	-306.661	100.027	-19.3299	0.227273	0.295455	-234.946	81.3748	-11.4532	0.0632997	0.221886	-309.474	143.235	-16.5219	0.232375	0.29128	33	13.2	-181.177	74.4698	-9.59224
-53.2673	8.50129	-5.7776	0	0.235672	-80.1067	77.3975	-3.66926	0.120994	0.227163	-138.167	54.0195	-3.58344	0.0516591	0.112745	-186.635	41.8387	-12.7621	0.144594	0.29657	-134.401	72.7977	-3.58248	0.10566	0.158113	-195.265	94.119	-9.97375	0.298913	0.35462	-304.092	99.1549	-19.5963	0.230174	0.304159	-232.162	82.5202	-11.069	0.0656566	0.208754	-306.498	139.88	-16.3162	0.231447	0.289889	34	13.6	-183.452	74.0564	-9.89425
-53.2565	7.284	-6.08382	0	0.239625	-89.4108	79.2888	-4.23345	0.125801	0.229567	-142.824	46.9213	-3.88729	0.0542986	0.114253	-185.611	41.828	-13.8095	0.150239	0.297872	-142.33	77.649	-4.07508	0.109057	0.170189	-203.119	94.3619	-10.3572	0.304801	0.35462	-301.524	98.5296	-19.835	0.230658	0.309478	-229.468	83.9476	-10.7028	0.06633	0.19798	-303.521	136.697	-16.0642	0.230519	0.286178	35	14	-186.399	73.7261	-10.1909
-55.5635	6.0667	-6.39374	0	0.241601	-99.3999	81.18	-4.81951	0.133013	0.232372	-147.481	39.8232	-4.18901	0.0592006	0.118024	-185.078	41.9489	-14.8513	0.14937	0.30178	-150.259	83.1172	-4.52877	0.115472	0.178868	-213.24	94.6047	-10.7448	0.316123	0.353261	-298.967	97.9043	-20.0028	0.228723	0.309961	-227.06	85.3751	-10.3234	0.0690236	0.186532	-300.545	133.514	-15.865	0.2282	0.284323	36	14.4	-190.277	74.2331	-10.4857
-61.437	6.34149	-6.69684	0	0.25	-109.389	83.0712	-5.38586	0.135417	0.237981	-152.138	33.1501	-4.49926	0.061086	0.118024	-185.585	46.2682	-15.8869	0.153278	0.303951	-158.188	89.1954	-5.01914	0.116226	0.19283	-225.78	94.8477	-11.0191	0.336504	0.353261	-297.752	98.0891	-20.2264	0.224855	0.315764	-224.653	86.8026	-9.94769	0.0710438	0.184175	-297.569	130.332	-15.6906	0.2282	0.280148	37	14.8	-195.041	76.3578	-10.7914
-70.7201	5.69317	-7.00971	0	0.249506	-119.378	84.9625	-5.97658	0.139423	0.23758	-156.796	38.9329	-4.79238	0.0580694	0.119532	-189.194	53.2232	-16.8624	0.15241	0.306557	-166.117	95.2736	-5.50477	0.118113	0.205283	-238.996	95.0905	-11.4612	0.350996	0.353714	-297.332	98.6649	-20.445	0.224371	0.319149	-222.245	88.2301	-9.56535	0.0744108	0.183502	-294.593	127.149	-15.505	0.228664	0.277829	38	15.2	-200.356	79.9871	-11.0973
-80.9881	6.60487	-7.32384	0	0.250494	-129.367	86.8537	-6.52005	0.14383	0.240385	-161.453	44.7156	-5.09006	0.0595777	0.11991	-196.567	60.2497	-17.8823	0.151976	0.307859	-174.045	101.352	-6.00881	0.120377	0.215849	-252.286	95.3334	-11.8666	0.361866	0.351449	-297.046	111.15	-20.7036	0.223888	0.324468	-219.837	89.6575	-9.18912	0.0794613	0.181818	-291.617	123.967	-15.2917	0.229592	0.275046	39	15.6	-206.539	84.0926	-11.401
-91.2561	7.73275	-7.6364	0	0.253953	-139.356	88.745	-7.08375	0.148237	0.24359	-166.11	50.4984	-5.40342	0.0580694	0.121795	-210.158	67.2763	-18.9392	0.148068	0.311767	-182.492	107.43	-6.47312	0.124528	0.221887	-266.644	99.0337	-12.2834	0.368659	0.351902	-296.761	124.248	-20.8892	0.227756	0.330271	-217.43	91.085	-8.8051	0.0895623	0.182155	-288.64	120.784	-15.0956	0.230056	0.272727	40	16	-213.194	88.7189	-11.6923
-101.989	8.86064	-7.93927	0	0.253953	-149.345	90.6362	-7.6205	0.157051	0.245593	-170.768	56.2878	-5.72303	0.0569382	0.122926	-226.692	74.3029	-19.9445	0.144594	0.311767	-191.246	113.508	-6.93953	0.130189	0.230189	-281.002	104.941	-12.6353	0.377717	0.353261	-297.016	137.346	-21.1099	0.232592	0.338491	-215.022	93.0702	-8.44103	0.104377	0.183502	-285.664	119.517	-14.8774	0.232375	0.272727	41	16.4	-212.327	87.0906	-11.7263
-112.575	8.8629	-8.37901	0	0.257411	-155.183	90.7686	-7.7476	0.15024	0.245192	-160.508	50.6991	-6.0693	0.0539216	0.134615	-230.036	72.6092	-20.0568	0.148936	0.311333	-196.704	113.257	-7.20996	0.119245	0.230189	-276.056	104.01	-12.7182	0.376812	0.351902	-293.05	131.777	-20.814	0.236944	0.33559	-204.878	92.8879	-8.00289	0.104377	0.183165	-281.955	118.943	-14.5386	0.227737	0.269944	42	16.8	-211.892	85.5685	-11.7358
-123.161	9.25694	-8.80338	0	0.259881	-161.391	90.901	-7.84838	0.143429	0.241987	-151.049	45.1168	-6.4079	0.050905	0.144042	-233.38	70.9153	-20.1636	0.14937	0.307425	-202.163	113.006	-7.47221	0.110566	0.230566	-271.11	103.079	-12.7263	0.374094	0.353714	-289.384	126.208	-20.5066	0.237427	0.337041	-197.146	93.2633	-7.60067	0.10404	0.182155	-278.249	118.369	-14.0935	0.227273	0.26577	43	17.2	-212.089	85.4283	-11.7433
-133.747	9.65097	-9.21776	0	0.265316	-167.6	91.0334	-7.96628	0.138221	0.238381	-142.916	51.3058	-6.73851	0.0516591	0.149698	-239.08	69.888	-20.1724	0.158489	0.305688	-207.621	112.755	-7.75485	0.106038	0.228302	-266.163	102.149	-12.7863	0.370924	0.356431	-287.014	120.639	-20.1966	0.24323	0.337041	-190.114	93.6388	-7.15486	0.102357	0.182155	-274.543	117.795	-13.7018	0.225881	0.261596	44	17.6	-212.707	85.8352	-11.7657
-144.394	10.045	-9.683	0.000494071	0.268281	-173.809	91.1658	-8.07129	0.135016	0.236779	-135.25	58.2972	-7.02573	0.0493967	0.156486	-245.518	70.9625	-20.2951	0.162831	0.306122	-213.08	112.504	-8.00377	0.102264	0.228302	-261.662	103.238	-12.829	0.371377	0.35779	-285.054	115.07	-19.8778	0.246132	0.336557	-183.693	94.0142	-6.74766	0.103367	0.180135	-271.9	117.221	-13.358	0.224026	0.263451	45	18	-214.241	86.3678	-11.7875
-155.112	10.4844	-10.1209	0.0034585	0.269269	-180.502	91.2982	-8.15815	0.133413	0.232372	-129.893	65.2885	-7.36015	0.0501508	0.161011	-253.35	72.2083	-20.3879	0.167173	0.307859	-218.538	112.253	-8.28748	0.100755	0.229057	-257.417	105.241	-12.8742	0.367301	0.361413	-283.093	109.501	-19.6451	0.246615	0.338491	-179.825	94.3896	-6.31345	0.105724	0.177104	-270.44	116.646	-12.9405	0.224954	0.262059	46	18.4	-216.294	86.925	-11.8094
-165.829	11.1453	-10.5585	0.00444664	0.272233	-187.609	91.4306	-8.27269	0.133013	0.230769	-128.752	72.2798	-7.69757	0.0437406	0.164027	-261.216	73.4541	-20.49	0.169779	0.306991	-223.997	112.002	-8.57369	0.102642	0.22717	-253.173	107.243	-12.869	0.371377	0.36413	-281.133	103.932	-19.3604	0.248066	0.339942	-175.957	94.7651	-5.89415	0.108081	0.173401	-268.981	116.072	-12.569	0.223562	0.261132	47	18.8	-218.792	87.4973	-11.8228
-176.546	11.8062	-11.0024	0.00543478	0.271245	-194.717	91.563	-8.34676	0.133013	0.228766	-130.447	79.2711	-8.05161	0.0411011	0.167044	-270.253	74.6999	-20.5957	0.174121	0.307425	-229.455	111.751	-8.80528	0.103396	0.227925	-248.928	109.246	-12.9193	0.370924	0.365942	-279.173	98.4522	-19.0539	0.253868	0.341876	-172.089	95.1882	-5.47617	0.112458	0.168687	-267.521	115.498	-12.1544	0.224954	0.257421	48	19.2	-221.687	88.1811	-11.843
-187.264	12.4671	-11.4419	0.00988142	0.270751	-201.825	91.8259	-8.46168	0.132612	0.232372	-133.429	86.2625	-8.34741	0.035822	0.167421	-279.29	75.9457	-20.726	0.188016	0.309596	-234.913	111.5	-9.0716	0.102642	0.22566	-245.132	111.249	-12.9767	0.368207	0.37183	-277.213	93.3507	-18.737	0.255319	0.339942	-169.029	96.1052	-5.05473	0.119192	0.168013	-267.089	114.924	-11.7704	0.227273	0.255566	49	19.6	-225.072	88.9508	-11.8597
-197.981	13.3742	-11.8859	0.0158103	0.269763	-208.932	92.6155	-8.5556	0.136218	0.229968	-138.318	93.2538	-8.64537	0.0380845	0.168552	-288.493	77.1915	-20.8078	0.190187	0.303951	-240.372	111.249	-9.34222	0.103019	0.232453	-241.637	113.252	-13.0247	0.369565	0.375906	-275.253	88.2492	-18.4094	0.255803	0.339942	-166.85	97.0222	-4.61026	0.126263	0.165657	-267.815	114.35	-11.4564	0.22449	0.251855	50	20	-229.191	89.8765	-11.8725
-208.699	15.6864	-12.3197	0.0187747	0.269269	-216.189	93.4051	-8.64749	0.139824	0.230769	-147.353	100.245	-8.95956	0.046003	0.169306	-297.72	78.4373	-20.9131	0.195832	0.302649	-245.83	110.998	-9.58178	0.102642	0.237358	-238.756	115.255	-13.0758	0.370924	0.379529	-274.12	83.1476	-18.1235	0.254352	0.340909	-165.506	97.9391	-4.20534	0.132997	0.158923	-268.542	113.776	-11.0258	0.227273	0.244898	51	20.4	-226.296	85.789	-11.8924
-207.969	13.7249	-12.9756	0.0103755	0.27668	-208.052	87.1431	-9.39534	0.122997	0.253205	-157.169	100.935	-8.95584	0.050905	0.170814	-294.802	76.7488	-20.6271	0.193226	0.302215	-244.224	110.684	-9.76798	0.101509	0.240755	-233.902	106.901	-12.7259	0.371377	0.375453	-272.769	79.0774	-17.7766	0.25	0.338975	-158.1	93.8481	-4.03207	0.129966	0.157576	-259.674	103.039	-10.7748	0.225417	0.241187	52	20.8	-223.607	82.085	-11.912
-207.24	14.545	-13.6271	0.00889328	0.282609	-200.064	80.881	-10.1322	0.116587	0.272436	-166.985	101.625	-8.95118	0.0554299	0.173077	-292.24	75.5654	-20.3208	0.192792	0.303517	-242.682	110.37	-9.96525	0.104528	0.244528	-230.335	98.7121	-12.3462	0.376359	0.370018	-271.419	75.0072	-17.4655	0.245648	0.334623	-150.694	89.7569	-3.87307	0.124242	0.154882	-250.806	92.303	-10.5263	0.218924	0.236549	53	21.2	-220.918	79.1648	-11.9374
-206.51	15.6128	-14.3095	0.00790514	0.284585	-192.075	74.6189	-10.8226	0.110978	0.286058	-176.801	102.314	-8.98435	0.061463	0.177225	-289.678	77.1057	-20.0243	0.191924	0.302215	-241.139	110.056	-10.1429	0.105283	0.247925	-226.767	91.966	-11.9839	0.381793	0.368207	-270.068	72.9171	-17.1753	0.237427	0.332205	-143.287	85.6656	-3.72143	0.121549	0.152525	-241.938	82.227	-10.2725	0.212894	0.235158	54	21.6	-218.267	77.0751	-11.9577
-205.78	16.6807	-14.9731	0.00790514	0.286561	-184.087	68.3568	-11.5715	0.105769	0.299679	-186.617	103.004	-8.97795	0.0671192	0.184766	-287.117	78.8587	-19.7388	0.194963	0.30482	-239.596	109.742	-10.3322	0.104528	0.250566	-223.199	90.7503	-11.6239	0.381793	0.37183	-268.718	71.6475	-16.8449	0.231141	0.327369	-136.219	81.5745	-3.56192	0.114141	0.149495	-233.07	73.0613	-9.9946	0.204082	0.234694	55	22	-215.858	75.8431	-11.9775
-205.347	15.3123	-15.6692	0.00889328	0.29249	-176.099	62.0947	-12.2773	0.103766	0.309696	-196.553	103.693	-8.99776	0.0742836	0.184766	-284.555	80.6117	-19.4729	0.191924	0.31003	-238.053	109.429	-10.5275	0.104906	0.250943	-220.984	89.5347	-11.1922	0.381341	0.370471	-267.367	70.3779	-16.5052	0.222921	0.323985	-129.563	77.4832	-3.41687	0.111448	0.148148	-224.202	74.0516	-9.73812	0.195269	0.232839	56	22.4	-213.837	74.7351	-11.9877
-206.265	14.7146	-16.3536	0.0148221	0.301877	-168.288	55.8327	-12.9939	0.100561	0.316106	-206.977	104.383	-8.96264	0.0844646	0.182504	-281.993	82.3646	-19.1546	0.191924	0.311333	-236.51	109.115	-10.7271	0.106038	0.251321	-218.852	88.3205	-10.8438	0.379076	0.372283	-266.017	69.3904	-16.1108	0.214217	0.315764	-122.908	73.392	-3.25464	0.109764	0.150842	-216.726	75.1035	-9.48785	0.187384	0.232839	57	22.8	-211.99	74.0899	-11.9952
-207.183	17.3229	-17.0409	0.0222332	0.30583	-160.853	49.5705	-13.6924	0.0985577	0.322516	-217.402	105.073	-8.979	0.0912519	0.17911	-280.505	84.1176	-18.8694	0.191489	0.312636	-234.967	108.801	-10.9131	0.105283	0.250943	-216.721	87.6149	-10.4183	0.378623	0.372736	-264.666	68.8528	-15.715	0.210348	0.307544	-116.252	69.3009	-3.08914	0.109428	0.152525	-209.362	76.1555	-9.23966	0.173933	0.234694	58	23.2	-210.399	73.5502	-12.0186
-208.798	20.8405	-17.7132	0.0286561	0.3083	-153.892	43.3085	-14.4263	0.0925481	0.326923	-227.827	105.762	-8.98399	0.101433	0.178733	-280.155	85.8877	-18.6068	0.191924	0.314373	-233.424	108.511	-11.1207	0.10566	0.250943	-214.589	86.9093	-10.0087	0.376812	0.374094	-263.316	68.3153	-15.3957	0.205996	0.305126	-109.596	65.2097	-2.92788	0.109764	0.153535	-201.998	77.2074	-8.9837	0.170223	0.235622	59	23.6	-209.002	73.7249	-12.0457
-211.543	24.358	-18.3894	0.0335968	0.306324	-146.993	42.7747	-15.1743	0.0889423	0.326923	-238.251	106.452	-8.98223	0.111614	0.177979	-279.806	88.2565	-18.3683	0.194095	0.316544	-231.881	108.324	-11.3067	0.106415	0.251698	-212.457	86.2037	-9.6381	0.372736	0.37817	-261.965	67.7778	-15.0403	0.203095	0.298839	-103.492	61.1185	-2.7727	0.109428	0.153535	-194.633	78.2593	-8.7394	0.164657	0.233766	60	24	-207.702	74.9445	-12.0618
-214.564	27.8756	-19.0751	0.0365613	0.30583	-140.094	42.2551	-15.8614	0.0833333	0.324519	-248.676	107.142	-8.98501	0.120287	0.176471	-279.456	90.6252	-18.0792	0.193226	0.317412	-230.338	108.136	-11.4863	0.106415	0.250566	-210.326	94.3453	-9.2824	0.365036	0.383152	-260.615	67.7834	-14.6954	0.210348	0.29352	-97.9827	57.0273	-2.61189	0.108081	0.157912	-187.269	79.3113	-8.47964	0.156308	0.232839	61	24.4	-201.833	72.2371	-12.1066
-211.659	25.0162	-19.6999	0.0335968	0.314229	-130.479	40.3781	-16.4059	0.0737179	0.332933	-245.097	100.681	-9.09177	0.116893	0.175716	-271.656	90.2996	-17.8775	0.184542	0.315241	-225.928	106.217	-11.6386	0.10566	0.249811	-208.164	93.0627	-9.0578	0.358696	0.374094	-250.568	65.2659	-14.0785	0.212766	0.289652	-95.0767	54.1469	-2.68663	0.10303	0.155219	-177.867	75.0663	-8.423	0.151206	0.231447	62	24.8	-196.471	69.7135	-12.1705
-209.03	22.1566	-20.3552	0.0271739	0.324111	-121.294	38.501	-16.9925	0.0657051	0.34375	-241.858	94.2198	-9.24747	0.111991	0.174585	-264.93	90.8108	-17.6984	0.174989	0.312636	-221.706	104.575	-11.8372	0.0988679	0.250189	-206.267	91.7798	-8.82704	0.351902	0.36413	-240.522	63.2916	-13.457	0.210348	0.2853	-94.1642	51.2666	-2.76509	0.0989899	0.156902	-168.465	70.8211	-8.35461	0.143785	0.231911	63	25.2	-191.352	67.3821	-12.2137
-206.401	19.5667	-21.0057	0.0227273	0.331028	-113.347	36.6238	-17.5268	0.0576923	0.351763	-238.619	88.5835	-9.39709	0.107466	0.174585	-258.873	91.8172	-17.4462	0.165436	0.306557	-217.484	102.932	-11.9693	0.0969811	0.247925	-204.655	90.4968	-8.63195	0.351449	0.355525	-230.475	61.3172	-12.8402	0.206963	0.281915	-93.2518	48.5255	-2.83615	0.0912458	0.157576	-159.063	66.5759	-8.27015	0.137291	0.232839	64	25.6	-187.563	65.4005	-12.2516
-203.963	17.5688	-21.635	0.0192688	0.33498	-115.731	34.7467	-18.0604	0.0480769	0.354167	-235.38	84.4232	-9.54955	0.103318	0.173454	-252.815	92.8235	-17.1988	0.156318	0.303951	-213.262	101.29	-12.1393	0.0928302	0.250189	-203.043	89.6381	-8.38417	0.352808	0.350091	-220.428	59.5719	-12.1822	0.205513	0.277079	-93.2518	46.132	-2.91342	0.0828283	0.156902	-150.196	62.4102	-8.20103	0.134972	0.232375	65	26	-184.639	64.2222	-12.2908
-202.458	17.3084	-22.2876	0.0133399	0.338933	-123.455	32.8696	-18.6149	0.0360577	0.355769	-232.142	82.2359	-9.67402	0.0995475	0.173077	-246.758	94.0066	-16.9352	0.150673	0.300478	-209.04	99.6476	-12.2696	0.0924528	0.253585	-201.431	91.0466	-8.1567	0.356884	0.339674	-211.01	58.4574	-11.5722	0.20648	0.277563	-93.6177	43.828	-2.98453	0.0744108	0.156902	-141.834	58.5999	-8.12212	0.130798	0.23423	66	26.4	-181.908	63.5382	-12.3277
-201.206	17.048	-22.9227	0.0108696	0.343379	-131.246	30.9925	-19.1546	0.0292468	0.357772	-228.903	81.2372	-9.79256	0.0984163	0.171569	-241.233	96.0222	-16.712	0.149805	0.298741	-204.819	98.0052	-12.4596	0.089434	0.257736	-199.82	93.7271	-7.90938	0.353261	0.335145	-201.714	57.343	-10.8958	0.210348	0.275629	-93.9837	41.5241	-3.05717	0.069697	0.156566	-134.249	55.9444	-8.04561	0.133581	0.235158	67	26.8	-179.708	62.5998	-12.3968
-200.212	13.1517	-23.5771	0.00642292	0.344862	-139.037	29.1154	-19.7249	0.0268429	0.365785	-225.664	81.0899	-9.9947	0.0935143	0.171192	-237.319	98.0377	-16.4981	0.143726	0.297438	-200.597	96.3628	-12.618	0.0875472	0.263396	-198.208	96.4076	-7.75342	0.355072	0.337862	-192.58	56.2285	-10.278	0.216151	0.276112	-94.7872	39.2201	-3.12855	0.0707071	0.158923	-128.966	53.7843	-7.99806	0.140538	0.236085	68	27.2	-178.044	62.1696	-12.4445
-200.17	12.9278	-24.2226	0.00642292	0.346344	-146.828	27.2383	-20.2418	0.0236378	0.370994	-222.426	81.7796	-10.1067	0.0931373	0.170437	-233.405	100.053	-16.3087	0.142857	0.298307	-196.378	94.7205	-12.7667	0.0916981	0.267547	-196.596	99.088	-7.56196	0.354167	0.334239	-184.075	55.114	-9.64938	0.217118	0.277079	-96.3596	36.9161	-3.20781	0.0727273	0.155219	-126.159	51.6887	-7.93493	0.146568	0.236085	69	27.6	-176.781	61.8024	-12.4786
-200.56	13.2708	-24.86	0.00642292	0.347332	-154.618	25.3612	-20.8011	0.0204327	0.374599	-219.187	82.4692	-10.2213	0.0950226	0.170437	-229.49	102.069	-16.0509	0.139818	0.301346	-193.219	93.0781	-12.9196	0.0939623	0.275472	-194.984	101.768	-7.28455	0.351449	0.337409	-176.48	53.9996	-9.00325	0.215667	0.277079	-97.9319	34.6122	-3.28871	0.076431	0.155556	-124.553	49.593	-7.87814	0.150742	0.240724	70	28	-175.981	61.4517	-12.5308
-201.975	13.6138	-25.5111	0.006917	0.347332	-162.409	23.5625	-21.3559	0.0200321	0.379808	-215.948	83.1589	-10.3585	0.0976621	0.170437	-226.074	104.084	-15.858	0.138081	0.30178	-190.061	91.4357	-13.1008	0.0928302	0.280377	-193.373	104.449	-7.05467	0.350091	0.344656	-168.886	52.9553	-8.39071	0.218085	0.273694	-100.309	32.3082	-3.35667	0.079798	0.148485	-124.791	47.4974	-7.79127	0.153989	0.241651	71	28.4	-171.449	59.022	-12.4143
-197.835	13.4535	-25.489	0.00642292	0.348814	-161.321	23.9043	-21.2524	0.0192308	0.375801	-209.5	76.2387	-10.445	0.0878582	0.169306	-222.301	99.6354	-15.4366	0.14112	0.294399	-185.971	87.5607	-13.0275	0.0935849	0.278868	-192.292	103.778	-6.93293	0.344203	0.325634	-161.457	52.2788	-8.0021	0.222437	0.270793	-93.5758	31.299	-3.29902	0.0760943	0.148485	-118.788	43.0493	-7.84436	0.141929	0.241651	72	28.8	-167.101	56.6038	-12.2958
-193.892	13.2933	-25.4713	0.00642292	0.351779	-160.232	24.2947	-21.1306	0.0184295	0.374199	-203.051	69.3182	-10.4775	0.0825792	0.170437	-219.015	95.1864	-15.0263	0.141989	0.283109	-182.122	83.7412	-12.9525	0.0928302	0.279245	-191.716	103.107	-6.82121	0.340127	0.313406	-154.027	51.6022	-7.64595	0.217602	0.268375	-87.066	30.2899	-3.26462	0.0727273	0.149832	-112.784	38.6011	-7.87275	0.132189	0.242579	73	29.2	-163.171	54.6039	-12.1755
-190.84	13.133	-25.4555	0.00592885	0.351779	-159.659	24.7001	-21.0167	0.0184295	0.370593	-197.671	62.3976	-10.5253	0.0750377	0.1727	-215.73	90.7373	-14.6042	0.145897	0.271819	-178.603	80.0629	-12.8651	0.0913208	0.278113	-192.103	102.436	-6.70288	0.33288	0.29846	-146.597	50.9257	-7.27098	0.222921	0.265957	-80.5562	29.2808	-3.21073	0.0700337	0.153535	-106.781	37.7612	-7.9282	0.119666	0.245362	74	29.6	-159.359	52.7279	-12.0519
-187.787	12.9727	-25.4322	0.0034585	0.354743	-159.395	25.1054	-20.9152	0.0176282	0.370593	-193.042	55.4771	-10.5791	0.0686275	0.174208	-212.444	86.2882	-14.1875	0.144594	0.267911	-175.084	76.3847	-12.805	0.0916981	0.276981	-192.49	101.766	-6.51066	0.32654	0.280344	-139.168	50.2491	-6.90813	0.220503	0.260638	-74.0465	28.2717	-3.15947	0.0653199	0.158923	-100.778	38.0362	-7.9698	0.113173	0.247681	75	30	-155.94	50.8518	-11.9339
-186.161	12.8125	-25.4109	0.00247036	0.356225	-160.537	25.5108	-20.7897	0.0232372	0.368189	-188.414	48.5566	-10.6252	0.061086	0.176471	-209.158	81.8391	-13.7685	0.138949	0.260964	-172.264	72.7064	-12.7228	0.090566	0.275849	-192.876	101.095	-6.4166	0.326087	0.267663	-131.738	49.5726	-6.5473	0.220986	0.25677	-67.5367	27.2626	-3.10421	0.0599327	0.162963	-94.7743	38.3111	-8.01975	0.109462	0.25603	76	30.4	-153.06	49.0153	-11.8159
-185.546	12.6522	-25.3842	0.00247036	0.358202	-163.293	25.9162	-20.6929	0.0276442	0.364984	-185.354	41.636	-10.7052	0.0539216	0.179487	-205.873	77.39	-13.3419	0.140686	0.256188	-169.626	69.0282	-12.634	0.0909434	0.275849	-193.263	100.424	-6.30197	0.324275	0.261775	-124.308	48.896	-6.18418	0.220019	0.248066	-61.5046	26.3349	-3.05804	0.0575758	0.16734	-88.7709	38.8605	-8.04091	0.104824	0.269017	77	30.8	-150.769	47.3347	-11.6974
-186.451	12.4919	-25.3535	0.00247036	0.356719	-166.911	26.3216	-20.5686	0.0336538	0.362179	-183.298	34.7155	-10.7699	0.046003	0.183635	-202.596	72.941	-12.9289	0.138949	0.253582	-166.989	65.693	-12.5549	0.0898113	0.275094	-194.163	99.7531	-6.2172	0.338768	0.260417	-116.879	48.9316	-5.80199	0.218569	0.242263	-56.866	25.4131	-2.99625	0.0569024	0.167677	-82.7676	39.7513	-8.08569	0.0992579	0.275974	78	31.2	-149.535	46.1522	-11.5693
-188.954	12.3316	-25.3333	0.00247036	0.353755	-171.109	26.7269	-20.4527	0.0348558	0.358974	-182.85	28.4858	-10.8134	0.040724	0.18552	-200.054	68.4919	-12.526	0.139383	0.250109	-165.183	62.7934	-12.4778	0.0898113	0.276981	-195.555	99.0823	-6.01405	0.361413	0.267663	-109.449	52.3246	-5.43964	0.213733	0.242747	-55.9014	24.4912	-2.95884	0.0555556	0.16835	-76.7642	40.642	-8.10817	0.101113	0.278293	79	31.6	-148.81	45.4776	-11.4573
-193.076	12.1714	-25.3153	0.00197628	0.353261	-175.306	27.671	-20.3359	0.0404647	0.354167	-182.761	26.2887	-10.8713	0.0346908	0.189291	-197.513	64.0428	-12.1223	0.144594	0.253582	-163.586	59.8938	-12.3977	0.090566	0.275094	-196.947	98.4115	-5.88616	0.378623	0.275362	-102.02	55.7175	-5.0859	0.213733	0.239845	-56.624	23.5694	-2.90703	0.0589226	0.168687	-71.4528	41.5328	-8.1944	0.101113	0.279221	80	32	-149.873	45.7625	-11.3437
-197.403	12.1594	-25.2963	0.00197628	0.351285	-179.503	31.3891	-20.2248	0.0428686	0.351362	-183.592	28.4529	-10.9394	0.030543	0.194193	-194.971	59.8234	-11.7357	0.155449	0.252714	-161.99	57.5591	-12.3168	0.0901887	0.273585	-198.339	97.7406	-5.78465	0.37817	0.282609	-98.4976	59.1105	-4.71027	0.214217	0.243714	-58.1726	23.2041	-2.8564	0.0612795	0.165993	-76.392	42.4235	-8.22949	0.0992579	0.280148	81	32.4	-145.961	44.4309	-11.1527
-193.528	11.9489	-25.0473	0.00197628	0.352273	-176.918	29.703	-20.0731	0.0408654	0.347356	-181.613	30.0013	-10.7663	0.0324284	0.189668	-186.911	58.2299	-11.3115	0.150673	0.250109	-160.122	54.6935	-12.1624	0.0860377	0.27283	-189.395	94.0538	-5.43424	0.375	0.279438	-98.6014	59.9759	-4.81799	0.208897	0.24323	-53.7899	21.8017	-2.7891	0.0484848	0.161953	-72.7691	39.47	-7.97237	0.096475	0.276438	82	32.8	-142.395	43.3231	-10.9669
-189.653	11.7643	-24.7989	0.00197628	0.353261	-174.333	28.2009	-19.9231	0.0388622	0.345353	-180.422	31.5497	-10.5911	0.0320513	0.185897	-179.298	57.3202	-10.9249	0.140252	0.245332	-158.255	52.3928	-11.9999	0.0822642	0.269057	-180.45	90.3669	-5.09435	0.357337	0.278986	-99.3992	60.8411	-4.94097	0.205029	0.245164	-49.4749	20.9559	-2.73005	0.0427609	0.156566	-70.2648	36.5162	-7.69893	0.0904453	0.276902	83	33.2	-139.084	42.263	-10.7884
-185.778	11.641	-24.5668	0.00197628	0.355237	-171.747	27.0152	-19.7717	0.0380609	0.342147	-180.28	33.1499	-10.4381	0.0335596	0.184012	-171.686	56.4104	-10.5295	0.135475	0.242727	-156.956	50.0921	-11.8235	0.0788679	0.266792	-171.505	86.68	-4.76506	0.346467	0.278533	-100.511	61.7064	-5.0799	0.199226	0.25677	-45.3798	20.1101	-2.66567	0.037037	0.150842	-67.9123	33.5624	-7.45507	0.0848794	0.2718	84	33.6	-136.059	41.2752	-10.5966
-182.652	11.5176	-24.3205	0.00197628	0.356719	-169.219	26.0639	-19.6158	0.0380609	0.338942	-180.438	35.1657	-10.273	0.0343137	0.179487	-164.073	55.5007	-10.0965	0.13287	0.236648	-155.866	47.7914	-11.6714	0.0750943	0.264528	-162.56	82.993	-4.419	0.344656	0.277627	-102.141	62.5716	-5.16044	0.188588	0.266441	-41.2846	19.2642	-2.61529	0.0319865	0.144108	-66.2953	30.6086	-7.19745	0.0834879	0.269481	85	34	-133.132	40.402	-10.4107
-179.556	11.3942	-24.0748	0.00197628	0.358202	-166.812	25.192	-19.4611	0.0388622	0.335337	-180.998	37.1814	-10.112	0.0373303	0.171569	-156.46	54.5909	-9.67967	0.130699	0.231003	-154.776	46.0581	-11.5064	0.0679245	0.260755	-153.615	79.3061	-4.09416	0.340127	0.28442	-103.771	63.4369	-5.28525	0.180851	0.272727	-37.1894	18.4184	-2.54067	0.0292929	0.138384	-65.01	28.0399	-6.94194	0.0816327	0.264378	86	34.4	-131.103	39.9659	-10.2271
-176.461	11.2708	-23.8338	0.00148221	0.360672	-164.405	24.4881	-19.2941	0.0388622	0.333333	-182.737	39.1972	-9.93624	0.0380845	0.164404	-149.275	53.6812	-9.26741	0.13591	0.233174	-153.685	44.4068	-11.3435	0.0641509	0.258491	-144.671	75.7821	-3.79996	0.333333	0.288043	-105.431	64.3021	-5.41308	0.1794	0.277079	-36.6097	17.8156	-2.47944	0.0276094	0.13468	-66.6537	28.7488	-6.67647	0.080705	0.251855	87	34.8	-129.771	39.6582	-10.0517
-173.365	11.1474	-23.5907	0.00148221	0.362648	-161.997	24.4965	-19.1395	0.0416667	0.332933	-185.128	41.4452	-9.79079	0.0422323	0.157994	-142.566	52.7714	-8.87383	0.137647	0.233608	-152.595	42.7554	-11.1791	0.0539623	0.255849	-135.726	72.3588	-3.48794	0.325634	0.288949	-108.108	65.1674	-5.56538	0.182785	0.27176	-37.2699	17.259	-2.41869	0.0249158	0.131313	-71.1861	29.5224	-6.4197	0.0797774	0.241651	88	35.2	-128.71	39.5291	-9.86703
-170.269	11.0241	-23.3473	0.000988142	0.364625	-159.59	25.74	-18.9845	0.0424679	0.327324	-189.211	43.887	-9.6437	0.0441176	0.154977	-136.457	51.8617	-8.47333	0.146765	0.227964	-151.504	41.104	-11.0122	0.0486792	0.252075	-126.781	68.9354	-3.13855	0.329257	0.282609	-110.934	66.0326	-5.6752	0.188588	0.279014	-37.9302	16.881	-2.35841	0.0225589	0.12862	-75.7184	30.296	-6.17017	0.0774583	0.225881	89	35.6	-127.731	39.5724	-9.68266
-167.173	10.9007	-23.1045	0.000988142	0.367095	-157.182	27.8622	-18.8252	0.0436699	0.323317	-193.317	46.3289	-9.48909	0.0490196	0.153846	-130.347	50.9519	-8.0797	0.154147	0.224924	-150.414	39.4526	-10.8429	0.0441509	0.249811	-118.256	66.1227	-2.8375	0.325634	0.276268	-113.761	66.8978	-5.77253	0.193424	0.281915	-38.8755	16.5649	-2.29383	0.0276094	0.127609	-80.2508	31.0695	-5.89859	0.0765306	0.217069	90	36	-126.961	39.8443	-9.49426
-164.077	10.7773	-22.8613	0.000988142	0.369071	-154.775	30.6918	-18.65	0.0448718	0.318109	-197.423	48.7707	-9.33201	0.0550528	0.1546	-125.248	50.2335	-7.66671	0.165436	0.225358	-149.897	37.8012	-10.6748	0.0381132	0.248679	-109.907	63.8385	-2.5146	0.326993	0.279438	-116.588	67.7631	-5.88626	0.195358	0.288201	-39.948	16.6093	-2.2243	0.0309764	0.127946	-84.7832	32.1135	-5.63832	0.0871985	0.213822	91	36.4	-122.67	36.3073	-9.35423
-161.769	10.6497	-22.4781	0.000494071	0.368083	-154.449	28.6256	-18.3304	0.0428686	0.314904	-188.545	42.1496	-9.18188	0.0486425	0.154223	-116.933	48.245	-7.68221	0.159357	0.234911	-147.185	30.8426	-10.5883	0.0264151	0.246038	-104.151	57.658	-2.41201	0.31567	0.274909	-113.004	62.4522	-5.79742	0.190039	0.284333	-38.4593	17.1663	-2.13441	0.023569	0.120202	-79.5374	28.9762	-5.58336	0.0876623	0.214286	92	36.8	-119.286	33.2314	-9.22139
-159.828	10.5222	-22.0905	0.000494071	0.371047	-154.124	26.5594	-17.998	0.0424679	0.308494	-179.666	36.9838	-9.06367	0.0426094	0.155354	-116.371	46.2564	-7.67722	0.151976	0.240122	-144.473	24.6774	-10.5341	0.0158491	0.245283	-98.3962	51.4774	-2.3529	0.303895	0.272645	-109.42	58.6536	-5.67705	0.190522	0.277079	-37.0062	17.8767	-2.05133	0.0185185	0.114141	-74.2914	26.0754	-5.54776	0.0899814	0.219852	93	37.2	-116.085	30.9688	-9.08345
-158.026	10.3946	-21.7057	0.000494071	0.37253	-153.799	24.4931	-17.6771	0.0408654	0.302885	-170.787	33.2935	-8.92745	0.0380845	0.155354	-117.207	44.2678	-7.70689	0.155015	0.244898	-141.762	18.8347	-10.4228	0.00792453	0.248302	-92.7469	47.5232	-2.26216	0.299819	0.268116	-105.837	55.6478	-5.57642	0.188104	0.274178	-35.553	18.8148	-1.95376	0.0158249	0.111785	-69.0455	25.4494	-5.51873	0.0946197	0.226345	94	37.6	-113.32	29.5691	-8.94773
-156.225	10.2671	-21.3194	0.000494071	0.37253	-153.473	22.5105	-17.3533	0.0376603	0.295272	-164.083	30.7824	-8.79366	0.0320513	0.155354	-118.878	42.2792	-7.71635	0.15241	0.24099	-139.05	13.6759	-10.3541	0.00301887	0.250566	-87.3655	47.5225	-2.16011	0.302989	0.268569	-102.437	52.6763	-5.49028	0.179884	0.267892	-34.5662	19.8253	-1.86114	0.0151515	0.112458	-63.7995	26.5829	-5.48126	0.0974026	0.232375	95	38	-111.36	28.6028	-8.81325
-154.585	10.1395	-20.9252	0.000494071	0.375494	-153.148	20.6419	-17.0334	0.0352564	0.289663	-158.085	28.6309	-8.6591	0.025264	0.156863	-121.442	40.3585	-7.71782	0.146765	0.24099	-136.338	8.83474	-10.2682	0	0.256226	-81.9842	49.893	-2.09189	0.318841	0.275362	-99.4589	49.9382	-5.38845	0.176015	0.264507	-33.5945	21.2717	-1.77846	0.0154882	0.108418	-63.6046	27.7163	-5.45669	0.0974026	0.235158	96	38.4	-110.078	28.9304	-8.67597
-153.063	10.012	-20.5387	0.000494071	0.378458	-153.3	21.2624	-16.7146	0.0332532	0.28726	-153.425	26.9878	-8.52611	0.020362	0.159125	-124.133	38.8448	-7.71637	0.145897	0.238385	-133.626	10.4513	-10.1792	0.00150943	0.26	-76.6029	52.8511	-2.0367	0.325181	0.281703	-96.7502	47.2	-5.27408	0.172631	0.255803	-32.6227	22.718	-1.69305	0.0212121	0.107071	-67.1804	30.0463	-5.40492	0.096475	0.239332	97	38.8	-109.417	29.6597	-8.5399
-152.148	9.88442	-20.1543	0	0.377964	-153.819	21.9613	-16.4042	0.03125	0.284856	-150.971	26.2192	-8.39389	0.0158371	0.16365	-127.436	37.331	-7.72055	0.146765	0.234477	-131.22	13.2494	-10.0788	0.0162264	0.262264	-71.2215	56.7492	-1.92719	0.326993	0.284873	-94.47	44.4618	-5.21164	0.17118	0.253868	-31.6509	24.1643	-1.59683	0.0279461	0.107071	-71.8134	32.9166	-5.37174	0.0983302	0.242115	98	39.2	-109.671	30.5568	-8.41534
-151.3	9.75686	-19.7753	0	0.379941	-154.338	22.6602	-16.0781	0.0300481	0.281651	-149.4	25.4847	-8.2701	0.0131976	0.163273	-131.536	35.8343	-7.76648	0.14416	0.231003	-129.336	16.8659	-9.99377	0.0230189	0.261132	-71.2873	60.6472	-1.8639	0.325634	0.288043	-92.1898	41.7236	-5.14139	0.167795	0.254836	-30.6791	26.1914	-1.51159	0.0343434	0.110101	-76.9691	35.8469	-5.33743	0.0992579	0.238868	99	39.6	-110.639	31.6892	-8.27823
-150.452	9.62931	-19.3868	0	0.379447	-155.2	23.3591	-15.7606	0.0276442	0.278446	-149.072	24.7502	-8.13462	0.0120664	0.164027	-136.217	35.0968	-7.75628	0.147199	0.228832	-127.452	21.2815	-9.90572	0.030566	0.244151	-75.0403	64.5453	-1.77669	0.329257	0.296649	-89.9096	38.9855	-5.01083	0.164894	0.249516	-30.2254	28.4691	-1.43012	0.0393939	0.112121	-82.1859	39.0856	-5.34242	0.0987941	0.241187	100	40	-112.209	33.373	-8.14301
-150.109	9.50175	-19.0017	0	0.375988	-156.915	24.058	-15.443	0.0248397	0.277644	-148.841	24.0156	-7.98734	0.0113122	0.164027	-140.898	36.6573	-7.76657	0.145462	0.230135	-125.569	25.996	-9.81582	0.0350943	0.230566	-79.2195	68.4431	-1.73718	0.341938	0.305254	-87.8451	38.1679	-4.90362	0.15619	0.245648	-33.0267	31.1933	-1.33704	0.0444444	0.114478	-87.4551	42.3243	-5.29484	0.102505	0.25	101	40.4	-109.458	30.8136	-7.98094
-148.461	9.16907	-18.4917	0	0.370553	-156.187	22.7541	-15.047	0.0276442	0.275641	-144.82	19.6836	-7.88736	0.0116893	0.165913	-133.986	34.9394	-7.56164	0.139383	0.227964	-121.735	26.3638	-9.64628	0.0350943	0.231321	-76.9763	58.0695	-1.91115	0.330616	0.302083	-86.3729	37.3379	-4.82947	0.152805	0.244681	-32.1318	28.8081	-1.29967	0.0447811	0.111111	-84.4506	40.1971	-5.15408	0.096475	0.242115	102	40.8	-106.832	29.1615	-7.81994
-146.812	9.00821	-17.9848	0	0.358696	-155.698	21.7475	-14.6612	0.0300481	0.275641	-141.073	21.9831	-7.7902	0.0120664	0.175339	-127.689	33.2214	-7.35273	0.134173	0.227964	-117.902	26.9338	-9.48793	0.0366038	0.229811	-74.7332	47.6959	-2.04952	0.317029	0.290761	-84.9007	37.2122	-4.74152	0.141199	0.237427	-31.2368	26.5816	-1.26529	0.0447811	0.109764	-81.446	38.0699	-5.04621	0.0909091	0.236085	103	41.2	-104.534	28.8439	-7.65357
-145.168	8.89594	-17.4614	0	0.336957	-155.209	20.7409	-14.2707	0.0336538	0.274038	-138.874	26.3736	-7.6824	0.0113122	0.177979	-122.4	31.5035	-7.16594	0.12766	0.224056	-114.068	27.8455	-9.31542	0.04	0.230189	-72.8727	41.0744	-2.17052	0.303442	0.285326	-83.4285	37.6946	-4.64982	0.126209	0.228723	-30.3419	29.1229	-1.24252	0.0434343	0.10404	-78.4414	36.344	-4.92352	0.0853432	0.230519	104	41.6	-102.443	29.125	-7.48398
-143.603	8.89141	-16.9545	0	0.318182	-154.72	19.7343	-13.8831	0.0380609	0.272837	-136.674	30.7642	-7.56861	0.0116893	0.177979	-118.35	29.7856	-6.94583	0.119409	0.220582	-110.468	29.2179	-9.13925	0.0418868	0.226415	-71.2422	38.1442	-2.30524	0.282156	0.278533	-82.0444	38.1771	-4.56337	0.117021	0.220503	-29.447	32.744	-1.19689	0.0420875	0.0989899	-75.4368	34.6666	-4.799	0.0830241	0.225417	105	42	-100.632	30.0707	-7.31637
-142.039	8.98191	-16.4522	0	0.306818	-154.231	19.0392	-13.4852	0.041266	0.273237	-134.757	35.1547	-7.46104	0.0128205	0.175716	-115.095	28.0677	-6.71115	0.112028	0.21624	-107.014	30.673	-8.95964	0.0456604	0.222264	-69.8124	40.7059	-2.4808	0.267663	0.27038	-81.7558	38.6595	-4.46432	0.117021	0.210348	-28.5521	36.365	-1.1574	0.043771	0.0959596	-72.4322	32.9893	-4.67567	0.080705	0.222171	106	42.4	-99.2359	31.5137	-7.16167
-140.474	9.0724	-15.9418	0	0.296937	-153.742	20.5148	-13.0956	0.0444712	0.270032	-134.131	39.5452	-7.36199	0.0165913	0.170814	-112.651	28.5084	-6.51732	0.108554	0.211898	-103.626	32.1281	-8.80438	0.0471698	0.221509	-68.8411	43.4147	-2.6585	0.23913	0.263587	-81.467	39.1419	-4.36666	0.11412	0.204545	-28.7628	39.9861	-1.13449	0.0420875	0.0946128	-69.4276	31.3119	-4.57421	0.0871985	0.219852	107	42.8	-98.0551	33.3653	-6.99671
-138.91	9.1629	-15.4333	0	0.291008	-153.253	22.086	-12.7068	0.0448718	0.269631	-133.505	43.9357	-7.25435	0.0237557	0.167044	-110.43	31.0818	-6.30918	0.107686	0.210161	-100.239	33.7557	-8.62679	0.0498113	0.220377	-67.8697	46.1236	-2.82802	0.231431	0.261322	-81.1783	39.6244	-4.27474	0.110735	0.212766	-30.1146	43.6072	-1.0928	0.0417508	0.0922559	-66.9963	30.9106	-4.44443	0.0918367	0.221707	108	43.2	-97.2613	35.3433	-6.83348
-137.345	9.2534	-14.9226	0	0.284091	-152.764	23.6953	-12.3134	0.0472756	0.26883	-132.88	48.3262	-7.14114	0.0275264	0.164027	-109.373	34.2146	-6.12448	0.103343	0.208424	-96.8509	35.5654	-8.46234	0.0539623	0.219245	-67.1612	48.8324	-2.9257	0.22962	0.26404	-80.8896	40.3254	-4.23483	0.118956	0.219536	-33.2484	47.3195	-1.06369	0.043771	0.089899	-64.8399	30.5573	-4.31314	0.102041	0.224026	109	43.6	-96.953	37.3613	-6.67545
-135.781	9.34389	-14.4133	0	0.278656	-152.274	25.4806	-11.9276	0.0488782	0.26883	-132.254	52.7167	-7.04589	0.0328054	0.167044	-108.315	37.3474	-5.91626	0.0998697	0.205818	-93.4632	37.3751	-8.29857	0.0615094	0.220377	-70.1899	51.5412	-3.09538	0.22192	0.276268	-80.6009	41.0402	-4.13763	0.121857	0.228723	-37.0148	51.2022	-1.03338	0.0447811	0.0895623	-62.6835	30.204	-4.211	0.113636	0.230519	110	44	-97.1647	39.7168	-6.50704
-134.216	10.7737	-13.9235	0.00197628	0.275692	-151.785	27.2656	-11.5286	0.0504808	0.264022	-132.529	57.1067	-6.92419	0.0380845	0.169306	-107.257	40.4797	-5.69627	0.0990013	0.214503	-92.2564	39.1846	-8.12345	0.0683019	0.222642	-74.0207	54.2497	-3.22861	0.22192	0.278533	-81.1099	41.7548	-4.06286	0.126209	0.237427	-40.7809	55.0846	-0.997449	0.0478114	0.0892256	-60.5271	31.5518	-4.07848	0.118738	0.234694	111	44.4	-93.0859	37.478	-6.35766
-130.95	9.8161	-13.5448	0	0.275198	-149.789	25.1711	-11.3106	0.0444712	0.260016	-125.816	52.7266	-6.77448	0.0343137	0.168552	-99.1496	36.0078	-5.53861	0.0868432	0.206687	-87.5241	38.2636	-7.99316	0.0660377	0.221132	-71.781	50.8375	-3.09079	0.221014	0.27808	-76.9181	37.8203	-3.93056	0.122824	0.231141	-38.6026	53.1879	-1.07585	0.0414141	0.0845118	-57.2416	33.4708	-3.96012	0.118738	0.231911	112	44.8	-89.2104	35.6468	-6.22253
-128.879	10.1978	-13.173	0.000494071	0.273221	-147.793	23.0766	-11.1096	0.0380609	0.251202	-119.103	48.3465	-6.6672	0.0324284	0.167044	-91.0422	31.5359	-5.39447	0.08033	0.198871	-82.7918	37.3425	-7.84312	0.065283	0.22	-69.9946	47.4252	-3.04214	0.210145	0.277627	-72.7263	36.2159	-3.7802	0.114603	0.225338	-36.6069	51.2911	-1.14411	0.0360269	0.0784512	-53.9561	35.3898	-3.84885	0.113636	0.229592	113	45.2	-85.6598	33.9336	-6.07466
-128.155	10.5795	-12.7953	0.000988142	0.268775	-145.797	20.9822	-10.908	0.0348558	0.245593	-112.39	43.9663	-6.49535	0.0290347	0.166667	-82.9348	27.064	-5.2304	0.0686062	0.198437	-78.4593	36.4215	-7.69921	0.0618868	0.22	-68.2982	44.4195	-2.94993	0.202446	0.277627	-68.5345	35.2665	-3.66991	0.114603	0.220986	-34.6805	49.3944	-1.20647	0.0309764	0.0760943	-51.6888	37.3088	-3.71745	0.109926	0.223562	114	45.6	-83.1962	32.2797	-5.93201
-127.431	10.9612	-12.4185	0.000988142	0.266798	-143.802	18.9594	-10.7181	0.0324519	0.239183	-111.468	39.5862	-6.34816	0.0275264	0.163273	-75.5765	22.6016	-5.08603	0.0607903	0.199305	-74.8361	35.5005	-7.55422	0.0588679	0.219245	-67.0585	41.7273	-2.84879	0.197917	0.274004	-64.3426	34.3251	-3.53993	0.114603	0.220986	-32.7542	47.4976	-1.26224	0.0289562	0.0787879	-51.4963	39.3586	-3.61206	0.113173	0.218924	115	46	-81.0735	30.7555	-5.78667
-126.713	11.3429	-12.0419	0.00148221	0.26581	-141.901	17.1409	-10.5198	0.0288462	0.230769	-113.475	35.2061	-6.20659	0.0237557	0.162142	-68.234	18.8476	-4.92998	0.0499349	0.192358	-71.2129	34.5794	-7.43149	0.054717	0.220377	-65.8431	39.035	-2.73372	0.195199	0.27038	-60.1508	33.3836	-3.40132	0.112186	0.218569	-30.8278	45.6009	-1.33728	0.0289562	0.0845118	-51.3039	41.6628	-3.47793	0.115955	0.213358	116	46.4	-79.2754	29.8847	-5.64734
-127.417	12.1805	-11.6734	0.0153162	0.261364	-140.09	15.3224	-10.3147	0.0292468	0.224359	-115.482	31.1913	-6.03965	0.0199849	0.161011	-60.8914	18.4074	-4.78648	0.0473296	0.191055	-67.5897	33.6584	-7.31829	0.0498113	0.219245	-64.6278	38.0889	-2.65416	0.201993	0.26404	-56.9877	32.4422	-3.2697	0.115087	0.218085	-28.9015	43.7041	-1.39837	0.0272727	0.0946128	-51.4918	43.9671	-3.37136	0.1141	0.205937	117	46.8	-78.2502	29.7139	-5.49782
-128.121	14.9885	-11.3055	0.0237154	0.256423	-138.278	14.8366	-10.1133	0.0264423	0.223558	-117.488	27.1768	-5.88495	0.015083	0.162142	-56.4583	18.624	-4.60556	0.0503691	0.198437	-63.9665	32.7373	-7.18139	0.0486792	0.219245	-63.9953	39.4824	-2.54998	0.203351	0.267663	-57.2735	31.5007	-3.10635	0.117988	0.221954	-26.9751	41.8074	-1.47179	0.0265993	0.106061	-51.6953	46.2714	-3.2615	0.112709	0.198516	118	47.2	-78.8776	30.459	-5.34933
-130.611	17.7966	-10.9249	0.027668	0.250494	-136.467	17.4881	-9.92045	0.0252404	0.227163	-119.495	23.1622	-5.73194	0.01546	0.162142	-61.5392	20.0186	-4.43781	0.0560139	0.194095	-60.9408	31.8163	-7.02811	0.0475472	0.224151	-63.421	40.9313	-2.44421	0.210598	0.275815	-57.5772	34.4316	-2.98119	0.119439	0.225338	-27.949	39.9106	-1.54217	0.0276094	0.118182	-51.8988	48.5757	-3.13321	0.113173	0.194341	119	47.6	-80.8332	31.7653	-5.19615
-136.833	20.6047	-10.5366	0.0335968	0.244565	-134.655	20.1396	-9.72056	0.025641	0.229567	-121.502	19.5219	-5.5757	0.0165913	0.162519	-68.4301	24.2298	-4.28107	0.0620929	0.193226	-61.6949	30.8953	-6.87856	0.0471698	0.224906	-63.0403	43.0356	-2.31832	0.216033	0.283967	-57.881	38.5667	-2.82224	0.124275	0.227756	-29.3451	38.0139	-1.61219	0.0356902	0.128283	-54.1178	50.88	-3.02014	0.116883	0.19666	120	48	-82.8764	33.4152	-5.05445
-143.055	23.5146	-10.1646	0.0370553	0.23913	-132.843	22.7906	-9.52897	0.0316506	0.232372	-123.507	18.6596	-5.42725	0.0177225	0.164027	-75.7007	28.4406	-4.1301	0.070343	0.198437	-62.4487	30.1247	-6.73104	0.0483019	0.226415	-62.9833	45.169	-2.2375	0.228714	0.290308	-58.1846	42.7368	-2.6832	0.133946	0.224855	-30.7408	36.1171	-1.67701	0.0430976	0.135017	-56.4236	53.1838	-2.91044	0.12013	0.198052	121	48.4	-79.9602	30.9108	-4.86677
-139.661	20.3471	-9.97477	0.0301383	0.23666	-130.746	20.4193	-9.31798	0.0240385	0.230369	-117.322	13.7013	-5.02811	0.0139517	0.156863	-74.476	27.0557	-3.89531	0.0677377	0.185845	-61.3125	27.4714	-6.52301	0.0460377	0.225283	-57.6247	43.1895	-2.09068	0.222826	0.286232	-56.5802	42.1922	-2.62045	0.128143	0.221954	-30.4956	33.3954	-1.75022	0.0367003	0.13367	-51.4237	50.425	-2.60037	0.112245	0.197588	122	48.8	-77.2599	28.9283	-4.68318
-136.268	17.6228	-9.75001	0.0247036	0.234684	-129.017	18.1281	-9.10166	0.021234	0.228766	-111.136	12.0609	-4.62381	0.00490196	0.142911	-73.5268	25.6708	-3.66892	0.0686062	0.18541	-60.1763	24.9688	-6.33681	0.0403774	0.222264	-52.266	41.8005	-1.99317	0.221014	0.28442	-54.9757	41.7628	-2.52643	0.121373	0.214217	-31.3239	30.6737	-1.84967	0.0289562	0.124242	-46.6488	47.6664	-2.29816	0.1141	0.196197	123	49.2	-74.8103	27.8357	-4.50246
-132.874	14.8985	-9.5531	0.0167984	0.233696	-127.289	19.6869	-8.90133	0.0208333	0.227564	-104.951	12.6431	-4.21415	0.00678733	0.131599	-72.63	24.576	-3.44479	0.0794616	0.181068	-59.1464	22.4662	-6.1223	0.0381132	0.214717	-47.5227	41.0678	-1.89851	0.226449	0.28125	-53.8777	41.3334	-2.44635	0.107834	0.205513	-32.1523	27.952	-1.93264	0.0242424	0.122222	-42.8497	45.8972	-2.00894	0.11039	0.191095	124	49.6	-73.0321	27.6883	-4.31785
-129.481	12.4347	-9.35072	0.00988142	0.23419	-125.561	21.596	-8.67975	0.0248397	0.22476	-98.7649	14.7267	-3.81142	0.00942685	0.119532	-71.7332	25.905	-3.25606	0.096396	0.1802	-58.3832	22.2078	-5.91341	0.0373585	0.212453	-47.2312	40.3351	-1.77038	0.227808	0.282609	-53.2428	41.5307	-2.36896	0.0991296	0.201161	-32.9806	25.2304	-2.01121	0.0205387	0.117508	-39.9119	45.2287	-1.69872	0.108534	0.184137	125	50	-71.5361	28.3065	-4.1365
-126.087	11.11	-9.13267	0.00197628	0.235672	-123.832	23.5052	-8.47661	0.0288462	0.223958	-92.5792	17.7814	-3.40873	0.0139517	0.120287	-70.8364	27.2339	-3.03916	0.108988	0.181937	-57.6201	22.0475	-5.70645	0.0339623	0.213208	-47.0612	39.6609	-1.67224	0.228261	0.278533	-52.6079	45.7134	-2.29329	0.0996132	0.189555	-33.809	22.5087	-2.09756	0.0164983	0.113131	-39.3919	45.1973	-1.40178	0.109926	0.173933	126	50.4	-70.3868	29.7102	-3.9553
-122.694	10.696	-8.93064	0.00247036	0.236166	-123.058	25.4143	-8.26708	0.0316506	0.220353	-86.3936	21.4194	-3.01781	0.0324284	0.121418	-69.9396	32.4475	-2.814	0.121146	0.183239	-56.8569	21.8873	-5.50638	0.0328302	0.213208	-47.0848	40.0398	-1.58945	0.230525	0.282156	-51.973	49.8962	-2.20241	0.111702	0.184236	-34.6373	19.787	-2.18644	0.0141414	0.109091	-40.8445	45.8045	-1.08347	0.113173	0.163265	127	50.8	-69.5256	31.7006	-3.76862
-119.3	12.2698	-8.72892	0.0034585	0.233696	-122.37	27.3235	-8.06448	0.0364583	0.220353	-80.2079	25.1754	-2.59185	0.0475113	0.124811	-69.4599	37.9753	-2.59506	0.135475	0.184542	-56.0937	21.727	-5.29059	0.030566	0.210943	-47.1083	42.376	-1.46235	0.237772	0.288043	-53.4274	54.0789	-2.12145	0.116054	0.180851	-35.4656	17.177	-2.27222	0.0111111	0.106734	-42.2972	47.2028	-0.790697	0.121985	0.157236	128	51.2	-68.9	34.0105	-3.58744
-115.934	14.1962	-8.51041	0.00592885	0.230237	-121.682	29.2326	-7.8579	0.0420673	0.217548	-74.0223	29.4818	-2.20414	0.0580694	0.125943	-69.1435	43.5032	-2.37287	0.151541	0.184976	-55.3305	22.0212	-5.08957	0.030566	0.209811	-47.1319	45.6014	-1.40423	0.242301	0.294837	-55.7072	58.2616	-2.03785	0.118472	0.183752	-36.294	14.982	-2.34407	0.00841751	0.107071	-44.8537	48.8141	-0.465892	0.129406	0.153989	129	51.6	-68.6246	37.2098	-3.40392
-113.059	16.1226	-8.30357	0.00741107	0.226779	-120.995	31.1417	-7.64913	0.0448718	0.217949	-67.9187	37.6466	-1.80707	0.0678733	0.123303	-68.8271	49.0311	-2.16155	0.166305	0.187147	-55.0067	24.286	-4.86039	0.0369811	0.210189	-47.1554	50.453	-1.25364	0.247736	0.300272	-58.1604	62.4443	-1.98968	0.126209	0.183269	-37.3012	13.337	-2.43657	0.00707071	0.109428	-49.1976	50.4255	-0.173682	0.147032	0.146568	130	52	-68.7378	40.5898	-3.21951
-110.183	18.0487	-8.09989	0.00938735	0.225296	-120.306	33.1602	-7.44396	0.0500801	0.219551	-62.9374	45.8103	-1.40156	0.076546	0.122926	-68.5098	54.5571	-1.93325	0.175423	0.188884	-56.5331	26.5505	-4.68121	0.0418868	0.207547	-47.1786	55.4199	-1.1274	0.25317	0.298007	-60.8287	66.6261	-1.90995	0.140232	0.192456	-38.6224	13.0993	-2.51461	0.00505051	0.112121	-53.5402	52.0362	0.136255	0.156772	0.141929	131	52.4	-64.503	38.4438	-3.07627
-106.362	17.2749	-7.84842	0.00889328	0.22085	-114.35	29.918	-7.11387	0.0428686	0.21234	-56.0951	45.6055	-1.12177	0.0761689	0.121418	-62.4937	46.7362	-1.91734	0.167173	0.18845	-53.8207	26.0872	-4.59018	0.0422642	0.209434	-44.7903	55.773	-1.03063	0.251812	0.291214	-59.5662	63.4869	-1.89687	0.133946	0.18617	-34.9416	11.8304	-2.31436	0.003367	0.0993266	-48.108	49.2823	0.146991	0.148423	0.138683	132	52.8	-61.603	36.8725	-2.93396
-102.715	16.5115	-7.5989	0.00839921	0.216403	-108.393	28.5471	-6.78378	0.036859	0.202324	-54.6415	45.7325	-0.827287	0.076546	0.115762	-60.2084	39.3406	-1.91416	0.155449	0.182805	-51.1083	25.624	-4.52375	0.0422642	0.208302	-43.6327	56.1262	-0.876547	0.253623	0.289402	-58.3037	60.3477	-1.90291	0.132012	0.180851	-32.7491	13.0949	-2.13044	0.003367	0.0915825	-42.6757	46.5284	0.15217	0.138219	0.12987	133	53.2	-59.0043	35.4404	-2.78748
-99.3927	15.748	-7.34619	0.00889328	0.217391	-102.436	27.1761	-6.45511	0.03125	0.197516	-53.1878	46.7378	-0.532822	0.0780543	0.110106	-57.9231	32.1939	-1.91425	0.14937	0.179766	-48.3959	25.1607	-4.42767	0.0415094	0.209434	-44.2863	56.4793	-0.741245	0.256341	0.28125	-57.0412	57.2085	-1.9157	0.128627	0.169246	-31.1315	14.4846	-1.94303	0.0040404	0.0835017	-37.2435	43.7745	0.18872	0.12616	0.12616	134	53.6	-56.8461	35.3948	-2.6368
-96.0708	14.9846	-7.09118	0.0103755	0.216897	-96.4798	25.8052	-6.12037	0.0316506	0.189103	-51.7342	49.4925	-0.215506	0.0795626	0.104072	-55.8765	34.2355	-1.92919	0.14112	0.175423	-45.6835	26.0528	-4.3381	0.0430189	0.209057	-44.9399	56.8325	-0.580828	0.26087	0.273098	-55.7786	54.0693	-1.92881	0.12766	0.174565	-29.5138	16.0603	-1.73263	0.00639731	0.0771044	-35.5377	41.0206	0.205409	0.124304	0.122449	135	54	-54.7895	35.5079	-2.49323
-92.7488	14.2731	-6.8339	0.0118577	0.218874	-90.7489	24.683	-5.78911	0.0344551	0.187901	-50.2805	52.2472	0.0733482	0.0825792	0.096908	-54.1727	37.0028	-1.89334	0.134607	0.181937	-43.0319	27.3464	-4.26192	0.0464151	0.210566	-45.5935	57.1856	-0.474049	0.254982	0.266757	-54.5161	50.9301	-1.93063	0.128143	0.181818	-27.8961	17.6361	-1.54323	0.00808081	0.0690236	-34.1173	38.2667	0.213771	0.12616	0.119202	136	54.4	-53.2668	35.798	-2.34393
-89.4269	13.9007	-6.57723	0.0118577	0.216897	-85.0328	23.9478	-5.44734	0.0384615	0.186298	-48.9312	55.0019	0.369057	0.0833333	0.0912519	-52.4689	40.4169	-1.91357	0.126791	0.186279	-42.748	28.6399	-4.1681	0.0483019	0.209434	-46.2471	57.7591	-0.30966	0.255435	0.265851	-53.2536	47.7908	-1.91425	0.130561	0.187621	-26.3642	19.2119	-1.34474	0.0117845	0.0659933	-34.928	35.5128	0.21048	0.132189	0.114564	137	54.8	-51.9929	36.352	-2.19675
-86.105	14.4033	-6.31624	0.0143281	0.215909	-79.8343	24.3589	-5.13093	0.0476763	0.188702	-47.6795	57.7566	0.670092	0.0908748	0.0863499	-50.7652	44.071	-1.92943	0.123317	0.191924	-42.6903	29.9334	-4.07772	0.0498113	0.208679	-46.9007	58.4465	-0.160509	0.250453	0.263134	-51.9911	44.6516	-1.89567	0.141199	0.193907	-25.4861	20.7877	-1.15068	0.0175084	0.0616162	-36.4844	32.7589	0.220365	0.137291	0.121521	138	55.2	-51.0855	37.6996	-2.04236
-83.4537	15.6349	-6.06315	0.0158103	0.215415	-75.2933	27.3377	-4.80392	0.056891	0.200721	-46.4278	60.5113	1.01551	0.0995475	0.0852187	-50.3086	47.871	-1.9146	0.12462	0.198003	-42.6326	31.2269	-3.99477	0.0490566	0.209434	-47.5543	59.134	-0.0251818	0.245018	0.262228	-50.7286	41.5124	-1.87663	0.146518	0.203578	-24.7631	22.3634	-0.961219	0.0276094	0.0582492	-38.6073	33.7044	0.242727	0.141466	0.125232	139	55.6	-50.6252	40.0293	-1.90566
-80.9487	17.0711	-5.81853	0.0167984	0.211957	-71.171	30.9684	-4.48152	0.0645032	0.215545	-45.1761	63.266	1.32066	0.102941	0.0810709	-53.0649	51.671	-1.9405	0.124186	0.204516	-42.5748	32.5204	-3.9045	0.0509434	0.215094	-48.2079	59.8214	0.0928791	0.240036	0.261775	-49.4661	43.0921	-1.88701	0.148936	0.218569	-24.2536	23.9392	-0.766145	0.0373737	0.059596	-40.764	37.9144	0.233733	0.147959	0.130798	140	56	-50.4452	42.7059	-1.75599
-79.1212	18.507	-5.56692	0.0182806	0.208498	-67.7256	35.0074	-4.15271	0.0741186	0.22516	-43.9237	66.0197	1.62686	0.109351	0.0776772	-56.9912	55.4697	-1.92833	0.131133	0.208424	-42.5167	33.8131	-3.81752	0.0539623	0.21434	-48.8608	60.5077	0.254364	0.238225	0.260417	-48.2038	47.2986	-1.90732	0.157157	0.227273	-23.7438	25.5143	-0.568665	0.0508418	0.0612795	-42.9196	42.2158	0.256298	0.150278	0.140074	141	56.4	-48.3619	40.3851	-1.7438
-79.0373	18.0013	-5.43835	0.0172925	0.205534	-64.6609	33.8897	-3.86283	0.0701122	0.202724	-41.6323	63.1355	1.75429	0.109729	0.0739065	-55.0553	51.6945	-1.90202	0.13591	0.204516	-40.3892	30.4084	-3.68991	0.0486792	0.206038	-45.6763	57.7363	-0.0234675	0.221467	0.254982	-48.169	45.7261	-2.03899	0.15087	0.231625	-21.9321	23.0348	-0.598231	0.0397306	0.056229	-38.7044	39.8392	0.105272	0.144249	0.141929	142	56.8	-46.6787	38.2681	-1.71565
-79.4507	17.4957	-5.30629	0.0153162	0.199605	-64.2175	32.7722	-3.59375	0.0649038	0.186699	-39.5962	61.0598	1.90885	0.115008	0.0693816	-53.1194	47.9194	-1.83578	0.138949	0.201911	-38.2617	27.0037	-3.55127	0.0441509	0.193585	-42.7189	55.763	-0.271334	0.205163	0.245018	-48.1343	44.3817	-2.1208	0.145551	0.231141	-20.1203	20.5552	-0.625498	0.0313131	0.0531987	-34.4892	37.4627	-0.0449694	0.134972	0.141466	143	57.2	-45.9734	36.4551	-1.68495
-79.9703	16.99	-5.17971	0.0128458	0.192688	-63.7741	31.6546	-3.30362	0.0625	0.173478	-37.7751	60.3162	2.0157	0.121041	0.0678733	-51.1926	44.1442	-1.75843	0.139383	0.1967	-36.1342	23.599	-3.40651	0.0366038	0.189057	-42.8516	53.7898	-0.516398	0.202446	0.233696	-48.0995	44.4405	-2.22047	0.141683	0.241779	-18.695	18.0757	-0.634817	0.026936	0.0555556	-35.2681	35.0862	-0.160319	0.127087	0.134045	144	57.6	-45.5749	35.5254	-1.65895
-80.4899	16.6725	-5.05485	0.0113636	0.187253	-63.3307	30.537	-3.02636	0.0592949	0.159455	-36.2172	61.4665	2.17421	0.125943	0.0659879	-49.6137	40.369	-1.72677	0.143291	0.195832	-34.0067	20.1942	-3.26621	0.0313208	0.18717	-42.9843	51.8165	-0.794464	0.192029	0.227355	-48.1264	46.9599	-2.28897	0.136364	0.245164	-18.324	16.0285	-0.646913	0.0279461	0.056229	-37.0815	35.6848	-0.300197	0.12987	0.134045	145	58	-46.0774	35.6522	-1.64044
-81.0344	16.6121	-4.92762	0.0103755	0.181324	-62.8873	29.4194	-2.73989	0.0552885	0.149439	-40.9797	67.0337	2.31601	0.130468	0.0656109	-48.0348	38.617	-1.67847	0.143291	0.191489	-31.8792	16.7895	-3.12361	0.0256604	0.188679	-43.1169	49.8433	-1.07612	0.187047	0.227355	-48.3744	49.4793	-2.42383	0.133946	0.249516	-19.4951	15.8089	-0.667913	0.026936	0.0592593	-38.8948	37.2664	-0.442547	0.12616	0.134508	146	58.4	-47.0999	36.9407	-1.62709
-81.9303	16.5517	-4.80156	0.00889328	0.172925	-62.6573	28.3017	-2.47195	0.0504808	0.137019	-46.9371	72.6009	2.44356	0.13537	0.0652338	-46.4559	38.4069	-1.65106	0.14112	0.190621	-29.9663	17.3836	-2.99232	0.0207547	0.18566	-43.2496	50.0728	-1.35856	0.178895	0.236866	-48.6225	52.2815	-2.51982	0.130561	0.250967	-23.298	18.0193	-0.687081	0.0296296	0.062963	-40.7824	38.8479	-0.604996	0.122913	0.141002	147	58.8	-48.3862	38.8156	-1.61399
-82.8262	16.4914	-4.67997	0.00889328	0.166502	-62.5312	27.3609	-2.19505	0.0548878	0.129006	-53.3496	78.1681	2.55687	0.139894	0.0701357	-44.877	38.8304	-1.62551	0.138949	0.192358	-28.1539	19.0728	-2.85484	0.0230189	0.184906	-44.6896	52.8699	-1.64414	0.17346	0.245471	-48.8705	55.3622	-2.61701	0.123791	0.254352	-27.1009	20.7551	-0.699538	0.0316498	0.0683502	-43.0768	40.4294	-0.76672	0.118275	0.151206	148	59.2	-49.9401	40.8031	-1.59143
-83.7221	16.431	-4.5479	0.00839921	0.157115	-62.4051	26.4391	-1.91852	0.0560897	0.120593	-59.7622	83.7353	2.72547	0.145928	0.0735294	-43.2981	40.0557	-1.57416	0.138515	0.192358	-28.1123	20.762	-2.70693	0.0283019	0.181132	-46.7676	55.667	-1.90287	0.165761	0.255435	-49.1186	58.4429	-2.73269	0.123791	0.257253	-30.9038	23.684	-0.722297	0.0340067	0.0700337	-45.3712	42.011	-0.942948	0.115492	0.154453	149	59.6	-51.8721	42.8417	-1.56871
-84.618	16.3706	-4.42911	0.00790514	0.149209	-62.279	25.5174	-1.64618	0.0685096	0.115785	-66.1747	89.3025	2.82613	0.147813	0.0791855	-44.5743	41.4204	-1.54654	0.136778	0.196266	-28.6184	22.7715	-2.56376	0.0328302	0.177736	-48.8455	58.4642	-2.13984	0.169384	0.269928	-49.3666	61.5236	-2.84008	0.122824	0.255803	-34.7067	26.613	-0.736473	0.037037	0.0707071	-47.6657	43.5925	-1.04257	0.117347	0.157236	150	60	-54.0502	45.1523	-1.5395
-85.513	16.3099	-4.2996	0.00790514	0.140316	-62.1531	26.59	-1.3524	0.0805288	0.111378	-72.5854	95.0454	3.00304	0.15083	0.0780543	-47.4946	42.7841	-1.49522	0.135041	0.205384	-29.1242	24.8447	-2.42662	0.0369811	0.173208	-50.939	61.4799	-2.38992	0.17663	0.276721	-49.6141	64.603	-2.93284	0.12234	0.260155	-38.5085	29.541	-0.736946	0.040404	0.0767677	-50.5201	45.1732	-1.22504	0.124768	0.166512	151	60.4	-51.8782	42.7302	-1.45444
-81.7441	14.5277	-4.23608	0.00543478	0.139328	-62.7159	25.9539	-1.30597	0.0737179	0.106971	-70.4956	89.5671	2.91148	0.150452	0.0754148	-45.7025	39.6996	-1.43001	0.130265	0.183673	-27.935	24.857	-2.39804	0.0339623	0.171698	-46.7736	57.983	-2.32926	0.153986	0.266757	-47.0697	61.3738	-2.64802	0.119923	0.247099	-37.2097	27.8916	-0.736434	0.0377104	0.069697	-47.2578	42.7182	-0.917624	0.122913	0.16141	152	60.8	-49.9288	40.5221	-1.36944
-77.9752	12.7456	-4.16915	0.00395257	0.13834	-63.2789	25.6817	-1.2744	0.0721154	0.101763	-68.4058	84.0888	2.82873	0.148944	0.0735294	-44.296	36.6152	-1.35471	0.118975	0.161094	-27.7854	24.8693	-2.38117	0.0335849	0.166038	-42.6251	54.7059	-2.24655	0.143569	0.258152	-44.5252	59.2013	-2.29212	0.124275	0.237427	-35.9108	26.5282	-0.736586	0.0346801	0.0690236	-44.5565	40.2632	-0.699026	0.122913	0.157699	153	61.2	-48.3428	38.4163	-1.29302
-74.2063	10.9634	-4.10243	0.00197628	0.139822	-63.8418	26.2956	-1.2443	0.0709135	0.0949519	-66.6137	78.6104	2.7146	0.147436	0.0708899	-43.0988	33.5307	-1.30398	0.11637	0.143726	-29.4154	24.8816	-2.35253	0.0373585	0.158491	-38.7009	51.4288	-2.18603	0.138134	0.245924	-42.7407	57.0628	-1.95803	0.125242	0.226789	-34.612	25.1647	-0.742205	0.0346801	0.0686869	-41.8552	37.8082	-0.462322	0.131725	0.145176	154	61.6	-47.2099	36.5095	-1.20547
-70.4375	9.29143	-4.05767	0	0.147233	-64.4776	26.9096	-1.20208	0.0705128	0.0917468	-65.41	73.1321	2.67361	0.145551	0.0667421	-41.9017	31.3232	-1.21629	0.109857	0.138515	-31.0454	24.8939	-2.32447	0.0381132	0.150189	-37.5349	48.1517	-2.12103	0.136322	0.238225	-41.2692	55.7289	-1.67784	0.132012	0.217118	-33.659	23.8012	-0.733167	0.03367	0.0737374	-39.154	35.3533	-0.190301	0.134972	0.134972	155	62	-46.3503	35.4919	-1.11652
-66.6686	9.99951	-4.00042	0	0.156126	-65.4293	27.5505	-1.15885	0.0749199	0.0945513	-64.2064	67.6538	2.57524	0.144796	0.0644796	-41.295	31.3366	-1.1495	0.104646	0.136778	-32.6754	24.9062	-2.29064	0.0388679	0.142642	-37.7429	45.1316	-2.02857	0.134964	0.234149	-39.9401	54.732	-1.33947	0.139749	0.20648	-32.7424	22.7602	-0.732109	0.0319865	0.0781145	-36.4527	35.3566	0.075662	0.137755	0.128479	156	62.4	-46.2418	35.249	-1.02651
-62.8997	12.3337	-3.94491	0.006917	0.165514	-66.3811	28.4707	-1.09688	0.0821314	0.104567	-63.0027	62.4605	2.48551	0.143288	0.0607089	-40.9613	33.3338	-1.07904	0.0976987	0.135041	-34.3054	25.0344	-2.25615	0.0392453	0.138113	-40.7561	42.4273	-1.9273	0.141757	0.236413	-38.6109	53.9471	-0.997648	0.14942	0.19971	-31.8257	22.1462	-0.727978	0.03367	0.0821549	-37.4329	37.0875	0.305759	0.148423	0.128479	157	62.8	-47.4046	35.8432	-0.937278
-59.3954	14.6807	-3.87118	0.0158103	0.16996	-67.3329	29.4772	-1.05763	0.0885417	0.110176	-62.3375	57.8413	2.41306	0.142534	0.0588235	-41.3645	35.7623	-0.986431	0.0976987	0.133304	-35.9354	25.1835	-2.22812	0.0407547	0.134717	-45.6636	44.5366	-1.89779	0.151268	0.242754	-40.8009	54.2143	-0.663461	0.15764	0.191489	-30.909	22.0745	-0.709145	0.0420875	0.0868687	-42.9027	38.8185	0.565184	0.15538	0.12384	158	63.2	-49.3461	37.2756	-0.860325
-56.0705	17.0277	-3.81788	0.0212451	0.174407	-68.2846	30.4836	-1.03824	0.0949519	0.114183	-62.4071	58.7687	2.31138	0.145551	0.0580694	-42.4419	38.1909	-0.911888	0.101172	0.132436	-38.5793	25.3326	-2.22147	0.0403774	0.132453	-50.571	47.7959	-1.80677	0.156703	0.246377	-47.087	54.7655	-0.353113	0.166828	0.186654	-30.301	22.5109	-0.709343	0.0515152	0.0909091	-48.3726	40.605	0.804406	0.162801	0.124768	159	63.6	-51.5399	39.0058	-0.768909
-52.7455	19.3746	-3.75039	0.0247036	0.180336	-69.2364	31.4901	-0.99666	0.10016	0.117388	-63.626	60.4362	2.23702	0.146682	0.0576923	-43.6494	40.6195	-0.810757	0.108988	0.136344	-41.8599	25.4816	-2.18839	0.04	0.132075	-55.4784	51.0553	-1.72195	0.167572	0.254982	-53.3732	55.3167	-0.026233	0.183752	0.188588	-30.0477	23.3153	-0.71003	0.0599327	0.096633	-53.8424	43.9634	1.0472	0.171614	0.122449	160	64	-53.9542	41.3502	-0.686441
-49.4211	21.8613	-3.67639	0.027668	0.185771	-70.6084	32.495	-0.95835	0.108173	0.120994	-65.3943	62.3093	2.12364	0.145173	0.0565611	-45.0561	43.047	-0.739934	0.121146	0.145028	-45.1678	27.4247	-2.17314	0.0426415	0.130189	-60.3838	54.3134	-1.65055	0.193841	0.262228	-59.6572	55.8672	0.286678	0.193424	0.188588	-30.5886	27.5144	-0.706428	0.0639731	0.0989899	-59.3103	47.3198	1.31651	0.185065	0.119666	161	64.4	-50.6515	39.2435	-0.704756
-48.3717	20.6169	-3.6371	0.0271739	0.1833	-65.1836	27.1365	-1.04967	0.100962	0.123397	-58.3588	62.7449	2.10577	0.141403	0.0524133	-41.8927	41.727	-0.595843	0.112028	0.138081	-42.3582	25.7082	-2.1242	0.0418868	0.130566	-57.5912	52.8308	-1.69303	0.18433	0.255888	-57.371	53.7092	0.197639	0.183269	0.173598	-28.042	25.3052	-0.743593	0.0582492	0.0949495	-56.6944	43.4124	1.19722	0.170223	0.114564	162	64.8	-47.4911	37.7574	-0.724593
-47.3224	19.4179	-3.59963	0.0256917	0.179842	-60.1805	23.657	-1.17387	0.0905449	0.121795	-51.3232	63.3864	2.05891	0.134238	0.050905	-38.9499	40.5545	-0.425525	0.103778	0.132436	-39.5485	23.9917	-2.08898	0.0433962	0.128679	-55.2491	51.3482	-1.71502	0.178442	0.248188	-55.0849	51.5513	0.120226	0.17118	0.160542	-25.6825	23.0961	-0.753264	0.0518519	0.0915825	-54.0786	42.814	1.05582	0.16141	0.11039	163	65.2	-44.6126	37.0624	-0.756723
-46.2731	18.2955	-3.56432	0.0232213	0.17836	-55.1774	26.1103	-1.30145	0.0801282	0.125	-44.7499	64.0279	1.98991	0.122172	0.0520362	-36.4596	39.3819	-0.28575	0.100304	0.125488	-37.3028	22.2752	-2.02923	0.0449057	0.126038	-52.907	49.8655	-1.75277	0.180254	0.243659	-53.1446	49.3933	0.0257526	0.15764	0.153772	-24.0365	21.9654	-0.773476	0.0461279	0.086532	-51.4627	42.2467	0.880833	0.152134	0.10436	164	65.6	-42.3547	36.4893	-0.788682
-45.2238	17.173	-3.52278	0.020751	0.174901	-50.3439	28.5637	-1.43151	0.0689103	0.124199	-38.4077	64.6694	1.90827	0.11727	0.0539216	-34.1008	38.2094	-0.117422	0.107251	0.119409	-37.1104	20.5587	-1.99159	0.0501887	0.123774	-50.748	48.3829	-1.787	0.181159	0.242754	-51.444	47.2353	-0.109306	0.145551	0.15087	-24.9669	21.4857	-0.792789	0.0400673	0.0828283	-48.8468	42.1251	0.745986	0.153989	0.103896	165	66	-40.4661	35.9483	-0.806009
-44.4229	16.0506	-3.47908	0.0187747	0.175889	-45.9846	31.017	-1.553	0.0596955	0.126202	-32.0655	65.3109	1.85971	0.115385	0.0580694	-33.3082	37.0368	0.0426877	0.117238	0.112462	-36.918	18.8422	-1.94458	0.0532075	0.123396	-49.6241	47.1901	-1.81528	0.1875	0.247283	-49.7433	45.0774	-0.189906	0.136364	0.150387	-25.8973	21.006	-0.821709	0.0343434	0.0818182	-46.231	42.0036	0.647077	0.153525	0.113636	166	66.4	-39.0376	35.7671	-0.835885
-43.7925	14.9282	-3.44545	0.0177866	0.179842	-41.6253	33.4703	-1.6613	0.0564904	0.127804	-27.9004	65.9524	1.78439	0.115008	0.066365	-32.5157	36.2647	0.209764	0.127225	0.118975	-37.2046	18.6864	-1.90433	0.06	0.124151	-49.8144	46.957	-1.83189	0.196105	0.249547	-48.0426	43.0615	-0.289467	0.13588	0.152321	-26.8276	20.5262	-0.850584	0.03367	0.0771044	-43.6151	42.0569	0.465902	0.160946	0.12616	167	66.8	-39.7444	36.1731	-0.857322
-43.162	13.8057	-3.41745	0.0143281	0.177866	-39.2477	35.9237	-1.79981	0.0584936	0.129808	-33.7548	66.5939	1.7514	0.115385	0.071644	-31.7232	38.738	0.384538	0.133739	0.123752	-37.5998	20.3777	-1.8591	0.0630189	0.125283	-51.9061	46.7238	-1.86986	0.198822	0.252717	-46.3419	41.0917	-0.357789	0.144101	0.157157	-27.758	20.0465	-0.87565	0.0313131	0.0727273	-46.2066	42.2571	0.32781	0.166976	0.139147	168	67.2	-41.4634	37.7003	-0.889168
-42.5781	14.5335	-3.37274	0.0118577	0.175889	-41.5481	38.377	-1.91563	0.0616987	0.136218	-39.9912	67.5202	1.70199	0.116893	0.071644	-30.9306	42.1853	0.525097	0.147634	0.123317	-38.2455	22.4239	-1.81537	0.0641509	0.124528	-55.8896	47.0464	-1.90176	0.213315	0.258152	-44.6412	44.7452	-0.477181	0.153772	0.166344	-28.8423	20.0137	-0.891921	0.030303	0.0737374	-50.5038	42.4572	0.145008	0.169759	0.149351	169	67.6	-43.6001	39.5493	-0.900934
-42.4861	16.3273	-3.31709	0.0158103	0.171937	-43.8486	40.8304	-2.03859	0.0608974	0.140224	-46.2276	68.452	1.61903	0.118024	0.0773002	-30.1381	46.1657	0.719118	0.159792	0.13591	-39.2166	24.4701	-1.74411	0.0633962	0.128302	-60.1206	48.1607	-1.89134	0.23279	0.268116	-45.5291	48.8118	-0.551329	0.163443	0.178917	-29.9795	20.0685	-0.922719	0.0306397	0.0747475	-54.8546	42.6574	0.0186203	0.173469	0.160019	170	68	-45.9419	41.5605	-0.930562
-42.4098	18.1208	-3.28702	0.0148221	0.168478	-46.3687	43.2825	-2.15705	0.0653045	0.144631	-52.5511	69.3827	1.57747	0.123303	0.0791855	-29.3453	50.5442	0.880872	0.173252	0.145462	-40.214	26.612	-1.71611	0.0683019	0.133585	-64.6973	49.7805	-1.9109	0.245471	0.276268	-47.5712	52.8762	-0.690381	0.173114	0.188588	-31.1157	20.5889	-0.939975	0.0363636	0.0784512	-59.2038	42.8566	-0.131967	0.178108	0.169295	171	68.4	-44.1861	39.6952	-1.03629
-39.868	18.6573	-3.13094	0.013834	0.157609	-46.1086	41.5712	-2.22914	0.0588942	0.145032	-51.672	66.6663	1.50792	0.121041	0.0769231	-27.5596	49.5104	0.628731	0.159792	0.141554	-36.7178	23.4807	-1.7467	0.0607547	0.131698	-63.0138	47.6191	-2.15262	0.219656	0.267663	-45.8835	49.0874	-0.92762	0.154739	0.188588	-28.8408	20.9379	-0.939455	0.0309764	0.0784512	-58.011	39.7262	-0.336753	0.169759	0.166512	172	68.8	-43.0268	38.3076	-1.14309
-37.3261	19.1939	-2.96913	0.0133399	0.138834	-46.107	39.8598	-2.30193	0.0520833	0.143429	-50.8818	63.9498	1.44464	0.118778	0.0727753	-27.9542	48.8761	0.392015	0.14416	0.137647	-35.0045	20.3493	-1.78224	0.0584906	0.129434	-61.3304	45.4577	-2.42297	0.193388	0.256793	-45.2532	45.4561	-1.22369	0.135397	0.191006	-26.5659	21.2869	-0.927421	0.0279461	0.0740741	-56.8181	40.3392	-0.49706	0.16141	0.165584	173	69.2	-42.0322	37.1789	-1.2396
-34.7842	19.7304	-2.81355	0.0133399	0.128953	-46.4195	38.1485	-2.3678	0.0456731	0.144631	-50.0917	61.2333	1.34985	0.11463	0.0723982	-29.2215	48.2417	0.154816	0.126357	0.138949	-33.2913	18.3219	-1.78707	0.0543396	0.128679	-59.6469	43.2964	-2.6541	0.174366	0.252717	-44.9188	42.076	-1.47789	0.116054	0.191489	-24.291	21.8517	-0.915666	0.0272727	0.0740741	-55.6252	41.7098	-0.644994	0.152134	0.163729	174	69.6	-41.0846	36.2028	-1.3472
-32.2423	20.2669	-2.65219	0.0133399	0.129941	-46.8131	36.4372	-2.43263	0.0448718	0.146234	-49.3016	58.5168	1.25903	0.112368	0.0705128	-30.4886	47.6456	-0.09136	0.112896	0.135041	-31.578	17.2382	-1.81795	0.0524528	0.130189	-57.9635	41.464	-2.91384	0.161232	0.253623	-44.7802	38.6958	-1.7693	0.098646	0.194874	-22.1615	22.4804	-0.90842	0.0272727	0.0707071	-54.4323	43.0804	-0.798106	0.142857	0.165121	175	70	-40.2887	35.6292	-1.45133
-29.7005	20.8974	-2.47517	0.0143281	0.130435	-47.4286	34.7259	-2.49917	0.0420673	0.146234	-48.5115	55.8004	1.19422	0.112745	0.0701357	-31.8622	47.7725	-0.32846	0.105949	0.139818	-30.5369	18.7798	-1.83949	0.0479245	0.132453	-56.2801	39.8113	-3.14973	0.150362	0.265399	-44.6415	35.3157	-2.06956	0.0865571	0.196325	-20.0964	23.1091	-0.897253	0.0279461	0.069697	-53.5403	44.451	-0.997312	0.133117	0.169295	176	70.4	-40.0404	35.1696	-1.55383
-27.1586	21.5749	-2.31464	0.0153162	0.126976	-48.3142	33.0145	-2.57364	0.0408654	0.147436	-48.7273	53.6857	1.10927	0.110106	0.0697587	-33.2577	47.8995	-0.572389	0.103778	0.145897	-29.757	20.4168	-1.86841	0.0456604	0.131321	-54.5966	38.1586	-3.39826	0.149909	0.27808	-44.5157	32.1074	-2.32878	0.0860735	0.198259	-21.231	23.847	-0.881313	0.0292929	0.0740741	-52.8058	45.8216	-1.15627	0.12987	0.170686	177	70.8	-40.4965	35.6513	-1.65999
-26.1338	22.2524	-2.15468	0.0172925	0.126976	-49.3248	31.3032	-2.65232	0.041266	0.149038	-50.5866	56.9164	1.01788	0.107089	0.0705128	-34.6532	48.1641	-0.808403	0.0994355	0.153713	-30.7916	22.359	-1.90467	0.049434	0.133585	-52.9132	36.5059	-3.6291	0.150815	0.296196	-44.9273	31.4511	-2.59947	0.0841393	0.192456	-23.0667	24.7175	-0.881731	0.030303	0.0818182	-52.0713	47.1921	-1.32743	0.136364	0.172542	178	71.2	-41.4022	36.2385	-1.76708
-27.1507	22.9299	-1.99453	0.0222332	0.127964	-50.6467	29.5919	-2.72293	0.0428686	0.151843	-53.8421	60.201	0.948184	0.104449	0.0708899	-36.0487	48.9975	-1.04395	0.0976987	0.160226	-32.0605	24.3363	-1.93373	0.0558491	0.137358	-51.2297	34.8532	-3.90032	0.154891	0.3125	-45.4019	31.0858	-2.89165	0.0918762	0.200677	-24.9023	25.588	-0.868613	0.03367	0.0882155	-51.3368	48.5627	-1.49617	0.137755	0.179035	179	71.6	-42.9037	36.8257	-1.87203
-30.0923	23.6074	-1.83461	0.0296443	0.125988	-51.9687	27.8805	-2.80202	0.0504808	0.153045	-57.1737	63.4855	0.882727	0.0976621	0.071644	-37.4442	49.8309	-1.29138	0.0937907	0.168042	-34.6368	26.3137	-1.95612	0.0615094	0.143396	-51.271	33.2006	-4.16485	0.157156	0.32654	-46.2065	30.7204	-3.16916	0.0952611	0.214217	-26.738	26.4585	-0.850451	0.0373737	0.0902357	-50.6024	49.9333	-1.66239	0.135436	0.183673	180	72	-45.2549	37.9414	-1.97583
-33.5426	24.2841	-1.65439	0.041996	0.12747	-53.2895	26.6922	-2.88219	0.0560897	0.154647	-61.0849	66.7685	0.796805	0.0942685	0.0735294	-38.8386	51.3984	-1.55833	0.0933565	0.175423	-37.9842	28.2887	-1.97634	0.0739623	0.150566	-56.8095	35.0549	-4.42272	0.166667	0.330616	-47.3047	30.354	-3.42381	0.0981625	0.220019	-28.5724	27.3284	-0.839928	0.0420875	0.0952862	-49.8675	51.3033	-1.82157	0.132653	0.190631	181	72.4	-42.9026	35.2811	-1.92135
-31.3706	22.6108	-1.74289	0.0266798	0.125494	-51.417	24.2055	-2.88606	0.0480769	0.151042	-58.876	65.027	0.742398	0.0893665	0.0701357	-36.8838	48.2361	-1.51144	0.0881459	0.171515	-37.401	22.8609	-2.02166	0.0686792	0.149434	-53.8324	30.3338	-4.18169	0.149457	0.312047	-41.2382	27.2358	-3.1359	0.0855899	0.211315	-27.0885	26.2673	-0.906567	0.0377104	0.0905724	-48.0158	50.7529	-1.6483	0.12616	0.179499	182	72.8	-41.1155	33.8631	-1.8629
-29.5384	20.9375	-1.80893	0.0197628	0.124506	-49.6484	22.275	-2.90339	0.0388622	0.147837	-56.667	63.2856	0.692	0.0844646	0.066365	-35.5456	45.0738	-1.45484	0.086409	0.165436	-36.8179	23.9136	-2.06592	0.0607547	0.147547	-52.7224	27.9433	-3.90989	0.13587	0.28442	-36.3172	25.9306	-2.83632	0.073501	0.201644	-25.8088	25.2063	-0.966037	0.0319865	0.086532	-46.9741	50.2026	-1.51277	0.120594	0.168831	183	73.2	-40.0727	32.9579	-1.80392
-27.9604	19.2642	-1.88139	0.0197628	0.122036	-47.9955	21.1338	-2.91641	0.0348558	0.146234	-54.4581	61.5441	0.632531	0.0776772	0.0633484	-34.389	42.5815	-1.40379	0.0877117	0.165871	-36.2347	25.5309	-2.11685	0.0513208	0.148302	-53.1241	25.5528	-3.63899	0.123188	0.259511	-35.5824	27.2161	-2.55024	0.0647969	0.189072	-24.5291	24.1452	-1.02628	0.0306397	0.0824916	-46.3812	49.6522	-1.33385	0.119202	0.160019	184	73.6	-39.1926	32.483	-1.73987
-27.1798	18.0156	-1.95009	0.0177866	0.116601	-46.566	21.2034	-2.91717	0.0328526	0.147035	-52.2491	59.8027	0.575474	0.0746606	0.061463	-33.6146	41.9125	-1.35975	0.0898828	0.171515	-35.6515	27.2238	-2.14317	0.0445283	0.145283	-53.5258	23.2477	-3.36496	0.118207	0.237319	-34.8477	28.5016	-2.27641	0.0594778	0.180851	-23.3107	23.3378	-1.08256	0.0272727	0.0760943	-45.7884	49.1019	-1.14022	0.116883	0.151206	185	74	-38.6246	32.8536	-1.68037
-27.3626	17.2389	-2.02189	0.0182806	0.112648	-45.1365	22.4041	-2.92546	0.0304487	0.15024	-50.0401	58.1613	0.542977	0.0720211	0.0595777	-33.4381	42.8434	-1.32382	0.0924881	0.171081	-35.0683	29.0109	-2.1936	0.0471698	0.146792	-54.467	24.9698	-3.11239	0.117301	0.240942	-34.176	29.7871	-1.98701	0.0556093	0.161992	-22.7373	22.7155	-1.1515	0.0272727	0.0744108	-45.1955	48.5515	-0.950651	0.116419	0.145176	186	74.4	-38.221	34.1199	-1.61809
-27.8257	17.6091	-2.08799	0.0182806	0.113142	-43.7069	24.2331	-2.9303	0.0288462	0.154647	-47.8312	57.2068	0.493448	0.0686275	0.0584465	-33.8925	43.9346	-1.25681	0.100738	0.16891	-34.4851	30.7995	-2.2278	0.0479245	0.149811	-55.5616	31.6911	-2.85054	0.131793	0.236413	-33.888	31.4121	-1.71622	0.0633462	0.136364	-22.1951	22.1918	-1.20246	0.026936	0.0791246	-44.6026	48.0011	-0.784135	0.119666	0.143785	187	74.8	-38.1555	35.6759	-1.55668
-28.4383	18.4611	-2.15262	0.0172925	0.108202	-42.2774	26.381	-2.94267	0.0260417	0.161859	-45.6222	56.5983	0.454774	0.0674962	0.0607089	-34.5504	45.5751	-1.22939	0.109422	0.172818	-34.1291	32.5881	-2.27221	0.049434	0.149811	-56.6562	39.2754	-2.59888	0.135417	0.23596	-34.0317	33.0855	-1.42118	0.0705996	0.131528	-22.0606	21.6681	-1.25834	0.0299663	0.0821549	-45.6333	47.4508	-0.589566	0.119202	0.138219	188	75.2	-38.5707	37.5334	-1.48938
-29.3098	19.6991	-2.21482	0.0153162	0.109684	-40.8479	28.5289	-2.93914	0.0264423	0.16226	-43.8229	55.9898	0.450483	0.0674962	0.0637255	-37.8237	47.61	-1.17883	0.117673	0.175858	-33.8806	34.3767	-2.31305	0.0532075	0.153208	-57.7507	47.8245	-2.32054	0.144928	0.242754	-34.1754	35.0308	-1.1252	0.0783366	0.129594	-22.3381	21.8401	-1.31012	0.0309764	0.0851852	-47.1868	46.9004	-0.453235	0.122449	0.129406	189	75.6	-39.419	39.7862	-1.43508
-30.1812	20.9371	-2.29034	0.0158103	0.120059	-39.5247	30.699	-2.95369	0.0276442	0.163862	-42.3121	55.8876	0.378948	0.0682504	0.0671192	-41.0971	49.645	-1.12704	0.129831	0.1802	-36.4443	36.1654	-2.3647	0.0558491	0.154717	-58.8453	58.4405	-2.06811	0.164402	0.255435	-34.762	37.0201	-0.858017	0.0938104	0.132012	-22.8639	22.9307	-1.37818	0.0306397	0.0905724	-48.7402	46.3501	-0.254611	0.134972	0.12616	190	76	-41.3249	42.2656	-1.37675
-31.0519	22.1743	-2.37307	0.0222332	0.132411	-38.5384	33.0603	-2.96056	0.0316506	0.168269	-42.7556	55.9285	0.330873	0.0690045	0.0708899	-44.3681	51.6776	-1.07612	0.138949	0.18541	-41.4341	37.9519	-2.40421	0.0573585	0.159245	-63.7073	69.633	-1.8069	0.192935	0.266757	-35.3546	39.0074	-0.58095	0.130561	0.139265	-24.4234	25.159	-1.44487	0.0319865	0.0946128	-50.2907	45.7982	-0.0749107	0.144712	0.122449	191	76.4	-39.1041	39.0287	-1.39215
[truncated: 59 more rows]
[truncated: 7 more columns]

## Sheet: 4
P1					P2					P3					P4					P5					P6					P7					P8					P9							min	max	avg
[truncated: 251 more rows]
[truncated: 7 more columns]

## Sheet: 5
P1					P2					P3					P4					P5					P6					P7					P8					P9							min	max	avg
[truncated: 251 more rows]
[truncated: 7 more columns]
